# Supplementary material for: A larger basis set describes atomization energy core–valence correction better than a higher-order coupled-cluster method
Source: Royal Society of Chemistry journal article supplement (doi:10.1039/d3cp03893a), 2023-01-01
Supplement: d3cp03893a1.pdf [file d3cp03893a1.pdf]

# Supporting Information

## Physical Chemistry Chemical Physics

### **A larger basis set describes atomization energy core-valence correction better than a higher-order coupled-cluster method**

Aleksandr A. Chamkin,\* Elena S. Chamkina

#### Table of Contents

|                                                            |    |
|------------------------------------------------------------|----|
| <i>Extrapolation Techniques</i> .....                      | 2  |
| <i>Batch #1</i> .....                                      | 4  |
| <i>Batch #2</i> .....                                      | 15 |
| <i>Batches #3 and #4</i> .....                             | 22 |
| <i>Batch #5</i> .....                                      | 29 |
| <i>Batch #6</i> .....                                      | 38 |
| <i>Geometry Data</i> .....                                 | 44 |
| <i>Cartesian Coordinates of Optimized Structures</i> ..... | 47 |
| <i>Raw Energies</i> .....                                  | 63 |

## Extrapolation Techniques

In addition to using finite basis sets, we extrapolated the correlation energies to the complete basis set (CBS) limit using three different methods (**e1–e3**) as described below.

**e1:** The correlation energy is assumed to converge as  $E_X = E + AX^{-3}$  (widely known as the Helgaker formula<sup>1</sup>), where  $E_X$  stands for the correlation energy obtained with the basis set cardinal number  $X$ ,  $E$  is the CBS limit energy, and  $A$  is a system-specific constant. The present formula was used for the two-point extrapolation of the total correlation energy for each considered coupled-cluster method.

**e2:** The following more flexible form was used:  $E_X = E + AX^{-\beta}$ , where  $\beta$  is a constant specific for a given pair of cardinal numbers,  $X$  and  $X + 1$ . Initially, this constant was derived for the two-point  $2/3$  ( $\beta = 2.46$ ) and  $3/4$  ( $\beta = 3.05$ ) extrapolations for the SD(T)/nZ level.<sup>2</sup> We optimized this exponent for the  $4/5$  ( $\beta = 3.22$ ) extrapolation by performing the  $3/4/5$  three-point extrapolations for all available SD(T)/nZ ( $n = T, Q, 5$ ) data and taking the median value. The described exponents were used for extrapolation of the SD- and SD(T)-level correlation energies. The higher-order increments were extrapolated separately using the same formula but specifically derived exponents: 2.7174 ( $2/3$ , SDT–SD(T)), 2.9968 ( $2/3$ , SDT(Q)–SDT), 1.7139 ( $2/3$ , SDTQ–SDT(Q)), 2.4807 ( $3/4$ , SDT–SD(T)), 3.3831 ( $3/4$ , SDT(Q)–SDT), and 2.6072 ( $3/4$ , SDT(Q)–SDT).<sup>3</sup> There are no exponents optimized for higher contributions (SDTQ(P)–SDTQ and SDTQP–SDTQ(P)), so we assumed that these increments were sufficiently converged at the TZ level. The final extrapolated energy was then taken as the sum of the extrapolated SD(T)-level energies, extrapolated SDT–SD(T), SDT(Q)–SDT, and SDTQ–SDT(Q) increments (each with a specific exponent), and the SDTQP/TZ – SDTQ/TZ quantity. The extrapolations for the augmented basis sets were performed similarly, with the only difference in the  $2/3$  exponent ( $\beta = 2.51$ ) for the SD(T)/anZ level.<sup>2</sup>

**e3:** This is the recent extrapolation technique based on the Riemann zeta function.<sup>4</sup> The key formula is  $E = E_L + L^4(E_L - E_{L-1})\left(\frac{\pi^4}{90} - \sum_{l=1}^L l^{-4}\right)$ , where  $E_L$  is the correlation energy obtained with the basis set cardinal number  $L$ , and  $E$  is the exact energy. This two-point extrapolation method does not require the

determination of any additional L-specific constants. This technique was applied to the full correlation energies for each considered coupled-cluster method, as in the **e1** method.

For clarity, the abbreviation “eN{X,Y}Z” was used throughout the text, where eN represents the type of the two-point extrapolation (**e1–e3**), while XZ and YZ are two consecutive basis sets used for this extrapolation.

The extrapolated energies can be represented as a linear combination of finite basis set energies in all cases (**e1–e3**). Therefore, when the reaction energies are of interest (e.g. total atomization energy), there is no difference in whether they are extrapolated directly or the energies of the individual systems are extrapolated first and then subtracted.

The extrapolation of the Hartree-Fock energy was performed similarly for all methods (**e1–e3**) by using  $E_X = E + A \exp(-\alpha X^{1/2})$  formula with fitted values of  $\alpha$  (4.42 for 2/3 and 5.46 for 3/4 extrapolation).<sup>2</sup>

1. A. Halkier, T. Helgaker, P. Jørgensen, W. Klopper, H. Koch, J. Olsen and A. K. Wilson, *Chem. Phys. Lett.*, 1998, **286**, 243-252. DOI: 10.1016/s0009-2614(98)00111-0
2. F. Neese and E. F. Valeev, *J. Chem. Theory Comput.*, 2011, **7**, 33-43. DOI: 10.1021/ct100396y
3. A. Karton, *J. Chem. Phys.*, 2020, **153**, 024102. DOI: 10.1063/5.0011674
4. M. Lesiuk and B. Jeziorski, *J. Chem. Theory Comput.*, 2019, **15**, 5398-5403. DOI: 10.1021/acs.jctc.9b00705

*Batch #1*

Table S1. Absolute deviations of core-valence corrections to the atomization energy from reference values in kcal mol<sup>-1</sup>. Reference values (REFERENCE) are computed as the mean of SD(T)/eN{Q,5}Z (N = 1 – 3) values. The range of SD(T)/eN{Q,5}Z (N = 1 – 3) values (RANGE, RMS = 0.0094 kcal mol<sup>-1</sup>) and the absolute deviations for a given coupled-cluster method and basis set (including extrapolated results) are shown. Color encoding shows the highest (red) and the lowest (green) values. Maximum (MAX), mean (MAD), root mean square (RMS), and standard deviation (SD) are provided at the bottom of the Table.

| System   | REFERENCE | RANGE  | SD/DZ  | SD(T)/DZ | SD/TZ  | SD(T)/TZ | SD/QZ  | SD(T)/QZ | SD/SZ  | SD(T)/SZ | SD/e{D,T}Z | SD(T)/e{D,T}Z | SD/e{T,Q}Z | SD(T)/e{T,Q}Z | SD/e{Q,5}Z | SD(T)/e{Q,5}Z | SD/e2{D,T}Z | SD(T)/e2{D,T}Z | SD/e2{T,Q}Z | SD(T)/e2{T,Q}Z | SD/e2{Q,5}Z | SD(T)/e2{Q,5}Z | SD/e3{D,T}Z | SD(T)/e3{D,T}Z | SD/e3{T,Q}Z | SD(T)/e3{T,Q}Z | SD/e3{Q,5}Z | SD(T)/e3{Q,5}Z |
|----------|-----------|--------|--------|----------|--------|----------|--------|----------|--------|----------|------------|---------------|------------|---------------|------------|---------------|-------------|----------------|-------------|----------------|-------------|----------------|-------------|----------------|-------------|----------------|-------------|----------------|
| alcl     | 0.4094    | 0.0028 | 0.3314 | 0.1827   | 0.2214 | 0.0584   | 0.1970 | 0.0205   | 0.1920 | 0.0106   | 0.1751     | 0.0060        | 0.1791     | 0.0072        | 0.1867     | 0.0003        | 0.1572      | 0.0143         | 0.1795      | 0.0065         | 0.1872      | 0.0012         | 0.1548      | 0.0169         | 0.1746      | 0.0142         | 0.1858      | 0.0015         |
| alf      | 0.6198    | 0.0207 | 0.8341 | 0.7601   | 0.4254 | 0.3311   | 0.2663 | 0.1527   | 0.2005 | 0.0792   | 0.2533     | 0.1504        | 0.1501     | 0.0225        | 0.1316     | 0.0021        | 0.1866      | 0.0803         | 0.1530      | 0.0257         | 0.1380      | 0.0093         | 0.1779      | 0.0712         | 0.1208      | 0.0104         | 0.1196      | 0.0114         |
| alh      | -0.1010   | 0.0011 | 0.2440 | 0.1564   | 0.1318 | 0.0327   | 0.1176 | 0.0079   | 0.1174 | 0.0041   | 0.0845     | 0.0193        | 0.1073     | 0.0102        | 0.1171     | 0.0001        | 0.0662      | 0.0395         | 0.1076      | 0.0098         | 0.1172      | 0.0005         | 0.0638      | 0.0422         | 0.1047      | 0.0148         | 0.1171      | 0.0006         |
| alh3     | -0.6714   | 0.0053 | 0.6728 | 0.7693   | 0.1474 | 0.1275   | 0.2550 | 0.0392   | 0.2785 | 0.0203   | 0.4927     | 0.1428        | 0.3335     | 0.0253        | 0.3031     | 0.0005        | 0.6266      | 0.2476         | 0.3316      | 0.0237         | 0.3008      | 0.0024         | 0.6441      | 0.2613         | 0.3533      | 0.0415         | 0.3074      | 0.0029         |
| bf       | 0.7881    | 0.0073 | 0.3949 | 0.3732   | 0.2065 | 0.1515   | 0.1167 | 0.0541   | 0.0927 | 0.0280   | 0.1272     | 0.0582        | 0.0512     | 0.0171        | 0.0674     | 0.0007        | 0.0964      | 0.0220         | 0.0528      | 0.0153         | 0.0698      | 0.0033         | 0.0924      | 0.0172         | 0.0346      | 0.0350         | 0.0630      | 0.0040         |
| bh       | 0.2136    | 0.0013 | 0.1562 | 0.1216   | 0.0828 | 0.0287   | 0.0687 | 0.0100   | 0.0653 | 0.0052   | 0.0519     | 0.0105        | 0.0585     | 0.0037        | 0.0616     | 0.0001        | 0.0399      | 0.0256         | 0.0587      | 0.0033         | 0.0620      | 0.0006         | 0.0383      | 0.0276         | 0.0559      | 0.0071         | 0.0610      | 0.0007         |
| bh3      | 1.1503    | 0.0073 | 0.6194 | 0.6718   | 0.0691 | 0.1552   | 0.0327 | 0.0540   | 0.0588 | 0.0280   | 0.1625     | 0.0623        | 0.1071     | 0.0199        | 0.0861     | 0.0007        | 0.2524      | 0.1467         | 0.1053      | 0.0181         | 0.0835      | 0.0033         | 0.2641      | 0.1577         | 0.1259      | 0.0386         | 0.0908      | 0.0040         |
| c2h2     | 2.6228    | 0.0170 | 1.2407 | 1.1681   | 0.4994 | 0.3403   | 0.3077 | 0.1256   | 0.2536 | 0.0651   | 0.1872     | 0.0083        | 0.1678     | 0.0311        | 0.1970     | 0.0017        | 0.0662      | 0.1434         | 0.1712      | 0.0273         | 0.2023      | 0.0076         | 0.0504      | 0.1611         | 0.1324      | 0.0708         | 0.1871      | 0.0093         |
| c2h3f    | 2.6234    | 0.0141 | 0.9827 | 0.8940   | 0.4639 | 0.2802   | 0.3134 | 0.1044   | 0.2704 | 0.0541   | 0.2454     | 0.0218        | 0.2037     | 0.0240        | 0.2252     | 0.0014        | 0.1607      | 0.0784         | 0.2063      | 0.0208         | 0.2295      | 0.0063         | 0.1497      | 0.0915         | 0.1759      | 0.0564         | 0.2174      | 0.0078         |
| c2h4     | 2.5094    | 0.0140 | 1.0144 | 0.9581   | 0.3947 | 0.2807   | 0.2352 | 0.1034   | 0.1904 | 0.0536   | 0.1337     | 0.0045        | 0.1188     | 0.0260        | 0.1434     | 0.0014        | 0.0325      | 0.1152         | 0.1217      | 0.0229         | 0.1478      | 0.0063         | 0.0193      | 0.1296         | 0.0894      | 0.0588         | 0.1352      | 0.0077         |
| ccl2     | 0.7729    | 0.0027 | 0.3955 | 0.0416   | 0.3709 | 0.1033   | 0.4873 | 0.0198   | 0.5091 | 0.0103   | 0.3606     | 0.1643        | 0.5722     | 0.0411        | 0.5321     | 0.0003        | 0.3566      | 0.1880         | 0.5701      | 0.0396         | 0.5299      | 0.0012         | 0.3561      | 0.1911         | 0.5936      | 0.0565         | 0.5361      | 0.0015         |
| cf2      | 0.6058    | 0.0018 | 0.0594 | 0.0328   | 0.2261 | 0.0368   | 0.2215 | 0.0134   | 0.2201 | 0.0069   | 0.2963     | 0.0661        | 0.2182     | 0.0037        | 0.2185     | 0.0002        | 0.3236      | 0.0775         | 0.2182      | 0.0033         | 0.2187      | 0.0008         | 0.3271      | 0.0790         | 0.2173      | 0.0080         | 0.2183      | 0.0010         |
| ch2c     | 1.9148    | 0.0117 | 0.8770 | 0.8038   | 0.3773 | 0.2357   | 0.2470 | 0.0864   | 0.2109 | 0.0448   | 0.1670     | 0.0035        | 0.1520     | 0.0225        | 0.1729     | 0.0012        | 0.0854      | 0.0962         | 0.1543      | 0.0199         | 0.1765      | 0.0053         | 0.0747      | 0.1084         | 0.1279      | 0.0501         | 0.1663      | 0.0064         |
| ch2nh    | 1.8027    | 0.0098 | 0.6593 | 0.5588   | 0.3861 | 0.1931   | 0.2878 | 0.0725   | 0.2593 | 0.0376   | 0.2711     | 0.0392        | 0.2161     | 0.0155        | 0.2294     | 0.0010        | 0.2265      | 0.0205         | 0.2179      | 0.0133         | 0.2322      | 0.0044         | 0.2206      | 0.0283         | 0.1980      | 0.0377         | 0.2241      | 0.0054         |
| ch2-sing | 0.4607    | 0.0023 | 0.1780 | 0.1288   | 0.1226 | 0.0483   | 0.0976 | 0.0172   | 0.0909 | 0.0089   | 0.0993     | 0.0144        | 0.0794     | 0.0054        | 0.0839     | 0.0002        | 0.0903      | 0.0012         | 0.0798      | 0.0048         | 0.0845      | 0.0010         | 0.0891      | 0.0005         | 0.0748      | 0.0111         | 0.0827      | 0.0013         |
| ch3f     | 1.2829    | 0.0060 | 0.3548 | 0.3151   | 0.2026 | 0.1191   | 0.1412 | 0.0447   | 0.1236 | 0.0232   | 0.1385     | 0.0365        | 0.0963     | 0.0097        | 0.1052     | 0.0006        | 0.1137      | 0.0045         | 0.0974      | 0.0083         | 0.1069      | 0.0027         | 0.1104      | 0.0003         | 0.0850      | 0.0234         | 0.1020      | 0.0033         |
| ch3nh2   | 1.9726    | 0.0092 | 0.5619 | 0.4953   | 0.3085 | 0.1815   | 0.2133 | 0.0683   | 0.1861 | 0.0354   | 0.2018     | 0.0494        | 0.1438     | 0.0144        | 0.1576     | 0.0009        | 0.1604      | 0.0019         | 0.1455      | 0.0124         | 0.1603      | 0.0042         | 0.1550      | 0.0086         | 0.1262      | 0.0353         | 0.1527      | 0.0051         |
| ch4      | 1.3312    | 0.0071 | 0.4661 | 0.4590   | 0.1590 | 0.1446   | 0.0728 | 0.0526   | 0.0492 | 0.0273   | 0.0296     | 0.0122        | 0.0099     | 0.0145        | 0.0243     | 0.0007        | 0.0205      | 0.0392         | 0.0115      | 0.0128         | 0.0267      | 0.0032         | 0.0271      | 0.0459         | 0.0060      | 0.0314         | 0.0200      | 0.0039         |
| c-hcoh   | 0.9832    | 0.0049 | 0.2822 | 0.2040   | 0.2471 | 0.0937   | 0.2058 | 0.0363   | 0.1928 | 0.0188   | 0.2324     | 0.0473        | 0.1757     | 0.0057        | 0.1791     | 0.0005        | 0.2267      | 0.0293         | 0.1764      | 0.0047         | 0.1804      | 0.0022         | 0.2259      | 0.0270         | 0.1680      | 0.0163         | 0.1767      | 0.0027         |
| c-hono   | 0.8667    | 0.0030 | 0.1439 | 0.0583   | 0.4325 | 0.0440   | 0.4476 | 0.0220   | 0.4472 | 0.0114   | 0.5540     | 0.0870        | 0.4587     | 0.0059        | 0.4468     | 0.0003        | 0.6012      | 0.1037         | 0.4584      | 0.0063         | 0.4468      | 0.0013         | 0.6073      | 0.1059         | 0.4615      | 0.0018         | 0.4467      | 0.0016         |

| System    | REFERENCE | RANGE  | SD/DZ  | SD(T)/DZ | SD/TZ  | SD(T)/TZ | SD/QZ  | SD(T)/QZ | SD/5Z  | SD(T)/5Z | SD/e1{D,T}Z | SD(T)/e1{D,T}Z | SD/e1{T,Q}Z | SD(T)/e1{T,Q}Z | SD/e1{Q,5}Z | SD(T)/e1{Q,5}Z | SD/e2{D,T}Z | SD(T)/e2{D,T}Z | SD/e2{T,Q}Z | SD(T)/e2{T,Q}Z | SD/e2{Q,5}Z | SD(T)/e2{Q,5}Z | SD/e3{D,T}Z | SD(T)/e3{D,T}Z | SD/e3{T,Q}Z | SD(T)/e3{T,Q}Z | SD/e3{Q,5}Z | SD(T)/e3{Q,5}Z |
|-----------|-----------|--------|--------|----------|--------|----------|--------|----------|--------|----------|-------------|----------------|-------------|----------------|-------------|----------------|-------------|----------------|-------------|----------------|-------------|----------------|-------------|----------------|-------------|----------------|-------------|----------------|
| cl2       | 0.2572    | 0.0066 | 0.2385 | 0.0492   | 0.2556 | 0.1274   | 0.3600 | 0.0488   | 0.3920 | 0.0253   | 0.2628      | 0.1603         | 0.4362      | 0.0086         | 0.4255      | 0.0007         | 0.2656      | 0.1731         | 0.4343      | 0.0072         | 0.4224      | 0.0030         | 0.2660      | 0.1748         | 0.4555      | 0.0231         | 0.4314      | 0.0036         |
| clcn      | 2.0616    | 0.0088 | 0.9346 | 0.6869   | 0.5397 | 0.1525   | 0.4874 | 0.0653   | 0.4672 | 0.0339   | 0.3734      | 0.0726         | 0.4493      | 0.0017         | 0.4460      | 0.0009         | 0.3089      | 0.1598         | 0.4503      | 0.0033         | 0.4480      | 0.0040         | 0.3005      | 0.1712         | 0.4397      | 0.0143         | 0.4424      | 0.0049         |
| clf       | 0.1399    | 0.0048 | 0.0716 | 0.1146   | 0.1794 | 0.0803   | 0.2449 | 0.0353   | 0.2691 | 0.0183   | 0.2247      | 0.0659         | 0.2927      | 0.0025         | 0.2945      | 0.0005         | 0.2423      | 0.0603         | 0.2915      | 0.0033         | 0.2922      | 0.0021         | 0.2446      | 0.0596         | 0.3048      | 0.0058         | 0.2990      | 0.0026         |
| c-n2h2    | 0.9857    | 0.0045 | 0.2809 | 0.1242   | 0.3721 | 0.0823   | 0.3501 | 0.0331   | 0.3417 | 0.0171   | 0.4105      | 0.0646         | 0.3340      | 0.0029         | 0.3330      | 0.0004         | 0.4254      | 0.0578         | 0.3343      | 0.0020         | 0.3338      | 0.0020         | 0.4274      | 0.0569         | 0.3299      | 0.0120         | 0.3315      | 0.0025         |
| co        | 1.1318    | 0.0094 | 0.5711 | 0.4902   | 0.3567 | 0.1798   | 0.2669 | 0.0694   | 0.2393 | 0.0360   | 0.2664      | 0.0491         | 0.2014      | 0.0112         | 0.2103      | 0.0009         | 0.2314      | 0.0016         | 0.2030      | 0.0092         | 0.2130      | 0.0042         | 0.2269      | 0.0082         | 0.1848      | 0.0316         | 0.2052      | 0.0052         |
| co2       | 2.0468    | 0.0145 | 0.8292 | 0.6975   | 0.5492 | 0.2717   | 0.4174 | 0.1072   | 0.3750 | 0.0556   | 0.4313      | 0.0923         | 0.3213      | 0.0128         | 0.3306      | 0.0015         | 0.3855      | 0.0228         | 0.3236      | 0.0099         | 0.3348      | 0.0065         | 0.3796      | 0.0137         | 0.2970      | 0.0431         | 0.3229      | 0.0080         |
| cs        | 1.0464    | 0.0085 | 0.8685 | 0.5534   | 0.5726 | 0.1270   | 0.5516 | 0.0628   | 0.5364 | 0.0326   | 0.4480      | 0.0525         | 0.5363      | 0.0159         | 0.5205      | 0.0009         | 0.3997      | 0.1221         | 0.5366      | 0.0171         | 0.5220      | 0.0038         | 0.3934      | 0.1312         | 0.5324      | 0.0041         | 0.5178      | 0.0047         |
| cs2       | 1.9868    | 0.0056 | 1.2520 | 0.7727   | 0.7141 | 0.0961   | 0.7143 | 0.0414   | 0.7132 | 0.0215   | 0.4877      | 0.1888         | 0.7144      | 0.0014         | 0.7120      | 0.0006         | 0.3999      | 0.2993         | 0.7144      | 0.0024         | 0.7121      | 0.0025         | 0.3884      | 0.3138         | 0.7144      | 0.0087         | 0.7118      | 0.0031         |
| dioxirane | 1.4135    | 0.0050 | 0.3442 | 0.1689   | 0.4329 | 0.0938   | 0.4118 | 0.0372   | 0.4041 | 0.0193   | 0.4703      | 0.0622         | 0.3964      | 0.0042         | 0.3959      | 0.0005         | 0.4848      | 0.0499         | 0.3968      | 0.0032         | 0.3967      | 0.0023         | 0.4867      | 0.0483         | 0.3925      | 0.0146         | 0.3945      | 0.0028         |
| f2        | 0.0084    | 0.0010 | 0.0286 | 0.1017   | 0.2119 | 0.0197   | 0.2436 | 0.0075   | 0.2525 | 0.0039   | 0.2891      | 0.0148         | 0.2667      | 0.0013         | 0.2618      | 0.0001         | 0.3190      | 0.0282         | 0.2661      | 0.0011         | 0.2609      | 0.0005         | 0.3229      | 0.0300         | 0.2725      | 0.0036         | 0.2635      | 0.0006         |
| f2co      | 1.7404    | 0.0095 | 0.4817 | 0.3433   | 0.4634 | 0.1783   | 0.3877 | 0.0704   | 0.3628 | 0.0365   | 0.4558      | 0.1088         | 0.3324      | 0.0084         | 0.3366      | 0.0010         | 0.4528      | 0.0818         | 0.3338      | 0.0064         | 0.3390      | 0.0043         | 0.4524      | 0.0783         | 0.3185      | 0.0283         | 0.3320      | 0.0052         |
| fccf      | 3.1610    | 0.0186 | 1.3257 | 1.1791   | 0.6760 | 0.3674   | 0.4842 | 0.1375   | 0.4287 | 0.0713   | 0.4025      | 0.0256         | 0.3442      | 0.0303         | 0.3705      | 0.0019         | 0.2964      | 0.1069         | 0.3477      | 0.0262         | 0.3759      | 0.0084         | 0.2825      | 0.1242         | 0.3088      | 0.0728         | 0.3604      | 0.0102         |
| formic    | 1.9196    | 0.0107 | 0.5935 | 0.4715   | 0.4479 | 0.2009   | 0.3548 | 0.0792   | 0.3248 | 0.0411   | 0.3866      | 0.0870         | 0.2868      | 0.0096         | 0.2933      | 0.0011         | 0.3629      | 0.0428         | 0.2885      | 0.0074         | 0.2963      | 0.0048         | 0.3598      | 0.0370         | 0.2696      | 0.0321         | 0.2879      | 0.0059         |
| h2co      | 1.4753    | 0.0087 | 0.5545 | 0.4675   | 0.3421 | 0.1685   | 0.2582 | 0.0644   | 0.2328 | 0.0334   | 0.2527      | 0.0426         | 0.1969      | 0.0115         | 0.2062      | 0.0009         | 0.2180      | 0.0062         | 0.1984      | 0.0096         | 0.2087      | 0.0039         | 0.2134      | 0.0126         | 0.1814      | 0.0307         | 0.2016      | 0.0048         |
| h2o       | 0.4768    | 0.0022 | 0.0988 | 0.0661   | 0.1027 | 0.0414   | 0.0843 | 0.0159   | 0.0793 | 0.0083   | 0.1043      | 0.0311         | 0.0709      | 0.0027         | 0.0741      | 0.0002         | 0.1049      | 0.0271         | 0.0713      | 0.0023         | 0.0745      | 0.0010         | 0.1050      | 0.0265         | 0.0675      | 0.0074         | 0.0731      | 0.0012         |
| h2s       | 0.4455    | 0.0008 | 0.3051 | 0.1791   | 0.1060 | 0.0223   | 0.1314 | 0.0061   | 0.1376 | 0.0032   | 0.0222      | 0.1070         | 0.1499      | 0.0056         | 0.1441      | 0.0001         | 0.0104      | 0.1399         | 0.1495      | 0.0053         | 0.1435      | 0.0004         | 0.0146      | 0.1442         | 0.1546      | 0.0086         | 0.1453      | 0.0005         |
| hccf      | 2.8756    | 0.0179 | 1.2694 | 1.1615   | 0.5853 | 0.3539   | 0.3942 | 0.1325   | 0.3389 | 0.0687   | 0.2972      | 0.0138         | 0.2548      | 0.0290         | 0.2808      | 0.0018         | 0.1855      | 0.1181         | 0.2582      | 0.0250         | 0.2862      | 0.0081         | 0.1709      | 0.1353         | 0.2195      | 0.0698         | 0.2707      | 0.0099         |
| hcl       | 0.2675    | 0.0005 | 0.1560 | 0.0855   | 0.0755 | 0.0010   | 0.0837 | 0.0036   | 0.0833 | 0.0019   | 0.0416      | 0.0374         | 0.0897      | 0.0070         | 0.0828      | 0.0000         | 0.0284      | 0.0515         | 0.0896      | 0.0069         | 0.0829      | 0.0002         | 0.0267      | 0.0533         | 0.0912      | 0.0078         | 0.0827      | 0.0003         |
| hcn       | 1.8806    | 0.0133 | 0.9066 | 0.7913   | 0.4971 | 0.2626   | 0.3609 | 0.0986   | 0.3212 | 0.0511   | 0.3248      | 0.0400         | 0.2614      | 0.0211         | 0.2795      | 0.0013         | 0.2579      | 0.0463         | 0.2639      | 0.0181         | 0.2834      | 0.0060         | 0.2492      | 0.0576         | 0.2363      | 0.0513         | 0.2723      | 0.0073         |
| hcno      | 2.5758    | 0.0150 | 0.9922 | 0.8035   | 0.6698 | 0.2915   | 0.5321 | 0.1112   | 0.4904 | 0.0577   | 0.5340      | 0.0759         | 0.4315      | 0.0204         | 0.4467      | 0.0015         | 0.4814      | 0.0077         | 0.4340      | 0.0172         | 0.4508      | 0.0068         | 0.4745      | 0.0186         | 0.4061      | 0.0537         | 0.4391      | 0.0083         |
| hf        | 0.2317    | 0.0009 | 0.0499 | 0.0325   | 0.0526 | 0.0169   | 0.0470 | 0.0067   | 0.0455 | 0.0035   | 0.0537      | 0.0104         | 0.0430      | 0.0008         | 0.0438      | 0.0001         | 0.0541      | 0.0078         | 0.0431      | 0.0006         | 0.0440      | 0.0004         | 0.0542      | 0.0075         | 0.0420      | 0.0027         | 0.0435      | 0.0005         |
| hnc       | 1.6505    | 0.0110 | 0.7173 | 0.6230   | 0.4150 | 0.2181   | 0.3013 | 0.0813   | 0.2686 | 0.0422   | 0.2877      | 0.0476         | 0.2183      | 0.0185         | 0.2343      | 0.0011         | 0.2384      | 0.0185         | 0.2203      | 0.0161         | 0.2376      | 0.0049         | 0.2319      | 0.0271         | 0.1973      | 0.0438         | 0.2284      | 0.0061         |
| hnco      | 2.4516    | 0.0156 | 0.9358 | 0.7924   | 0.5930 | 0.3000   | 0.4430 | 0.1153   | 0.3974 | 0.0598   | 0.4487      | 0.0926         | 0.3336      | 0.0195         | 0.3496      | 0.0016         | 0.3927      | 0.0122         | 0.3363      | 0.0162         | 0.3540      | 0.0070         | 0.3854      | 0.0017         | 0.3060      | 0.0536         | 0.3412      | 0.0086         |
| hnnn      | 1.8891    | 0.0100 | 0.6455 | 0.4078   | 0.6454 | 0.1888   | 0.5770 | 0.0736   | 0.5545 | 0.0382   | 0.6453      | 0.0967         | 0.5270      | 0.0105         | 0.5310      | 0.0010         | 0.6453      | 0.0609         | 0.5283      | 0.0084         | 0.5332      | 0.0045         | 0.6453      | 0.0562         | 0.5144      | 0.0317         | 0.5269      | 0.0055         |
| hno       | 0.6472    | 0.0024 | 0.1733 | 0.0200   | 0.3275 | 0.0425   | 0.3292 | 0.0181   | 0.3276 | 0.0094   | 0.3925      | 0.0519         | 0.3303      | 0.0003         | 0.3260      | 0.0002         | 0.4177      | 0.0556         | 0.3303      | 0.0007         | 0.3262      | 0.0011         | 0.4209      | 0.0561         | 0.3306      | 0.0042         | 0.3257      | 0.0013         |
| hocl      | 0.4234    | 0.0027 | 0.1376 | 0.0599   | 0.2385 | 0.0487   | 0.2924 | 0.0200   | 0.3107 | 0.0104   | 0.2810      | 0.0440         | 0.3317      | 0.0010         | 0.3298      | 0.0003         | 0.2975      | 0.0422         | 0.3308      | 0.0004         | 0.3281      | 0.0012         | 0.2996      | 0.0419         | 0.3417      | 0.0063         | 0.3332      | 0.0015         |
| hocn      | 2.3552    | 0.0150 | 0.9448 | 0.7859   | 0.6066 | 0.2874   | 0.4662 | 0.1108   | 0.4229 | 0.0575   | 0.4642      | 0.0774         | 0.3637      | 0.0180         | 0.3776      | 0.0015         | 0.4090      | 0.0040         | 0.3662      | 0.0149         | 0.3818      | 0.0067         | 0.4018      | 0.0146         | 0.3377      | 0.0506         | 0.3697      | 0.0082         |
| hof       | 0.2667    | 0.0001 | 0.0293 | 0.0838   | 0.2120 | 0.0011   | 0.2314 | 0.0008   | 0.2368 | 0.0004   | 0.2889      | 0.0369         | 0.2456      | 0.0005         | 0.2424      | 0.0000         | 0.3188      | 0.0507         | 0.2453      | 0.0005         | 0.2419      | 0.0000         | 0.3227      | 0.0525         | 0.2492      | 0.0005         | 0.2434      | 0.0001         |

| System   | REFERENCE | RANGE  | SD/DZ  | SD(T)/DZ | SD/TZ  | SD(T)/TZ | SD/QZ  | SD(T)/QZ | SD/5Z  | SD(T)/5Z | SD/e1{D,T}Z | SD(T)/e1{D,T}Z | SD/e1{T,Q}Z | SD(T)/e1{T,Q}Z | SD/e1{Q,5}Z | SD(T)/e1{Q,5}Z | SD/e2{D,T}Z | SD(T)/e2{D,T}Z | SD/e2{T,Q}Z | SD(T)/e2{T,Q}Z | SD/e2{Q,5}Z | SD(T)/e2{Q,5}Z | SD/e3{D,T}Z | SD(T)/e3{D,T}Z | SD/e3{T,Q}Z | SD(T)/e3{T,Q}Z | SD/e3{Q,5}Z | SD(T)/e3{Q,5}Z |
|----------|-----------|--------|--------|----------|--------|----------|--------|----------|--------|----------|-------------|----------------|-------------|----------------|-------------|----------------|-------------|----------------|-------------|----------------|-------------|----------------|-------------|----------------|-------------|----------------|-------------|----------------|
| honc     | 1.9160    | 0.0113 | 0.6991 | 0.5365   | 0.5449 | 0.2142   | 0.4499 | 0.0832   | 0.4198 | 0.0431   | 0.4800      | 0.0784         | 0.3805      | 0.0124         | 0.3883      | 0.0011         | 0.4548      | 0.0258         | 0.3822      | 0.0100         | 0.3913      | 0.0051         | 0.4515      | 0.0189         | 0.3630      | 0.0365         | 0.3828      | 0.0062         |
| hooh     | 0.5601    | 0.0016 | 0.0731 | 0.0406   | 0.2445 | 0.0279   | 0.2503 | 0.0120   | 0.2512 | 0.0062   | 0.3166      | 0.0567         | 0.2545      | 0.0004         | 0.2521      | 0.0002         | 0.3446      | 0.0679         | 0.2544      | 0.0007         | 0.2520      | 0.0007         | 0.3483      | 0.0694         | 0.2555      | 0.0025         | 0.2523      | 0.0009         |
| ketene   | 2.9891    | 0.0184 | 1.2148 | 1.1053   | 0.5886 | 0.3585   | 0.3974 | 0.1363   | 0.3405 | 0.0707   | 0.3250      | 0.0440         | 0.2578      | 0.0258         | 0.2808      | 0.0019         | 0.2228      | 0.0779         | 0.2612      | 0.0219         | 0.2864      | 0.0083         | 0.2094      | 0.0938         | 0.2225      | 0.0668         | 0.2704      | 0.0101         |
| methanol | 1.5946    | 0.0076 | 0.4378 | 0.3819   | 0.2588 | 0.1473   | 0.1839 | 0.0564   | 0.1617 | 0.0293   | 0.1834      | 0.0486         | 0.1292      | 0.0099         | 0.1384      | 0.0008         | 0.1542      | 0.0102         | 0.1305      | 0.0083         | 0.1406      | 0.0034         | 0.1504      | 0.0052         | 0.1154      | 0.0267         | 0.1344      | 0.0042         |
| n2       | 1.0684    | 0.0080 | 0.5449 | 0.3931   | 0.4504 | 0.1543   | 0.3865 | 0.0594   | 0.3667 | 0.0308   | 0.4106      | 0.0537         | 0.3399      | 0.0099         | 0.3460      | 0.0008         | 0.3952      | 0.0147         | 0.3410      | 0.0082         | 0.3480      | 0.0036         | 0.3932      | 0.0096         | 0.3281      | 0.0274         | 0.3424      | 0.0044         |
| n2h4     | 1.3939    | 0.0054 | 0.2925 | 0.1827   | 0.3108 | 0.1062   | 0.2674 | 0.0400   | 0.2554 | 0.0208   | 0.3185      | 0.0740         | 0.2357      | 0.0082         | 0.2428      | 0.0005         | 0.3214      | 0.0615         | 0.2364      | 0.0071         | 0.2440      | 0.0024         | 0.3218      | 0.0599         | 0.2277      | 0.0204         | 0.2406      | 0.0030         |
| n2o      | 1.5454    | 0.0086 | 0.5151 | 0.2842   | 0.6045 | 0.1551   | 0.5584 | 0.0636   | 0.5401 | 0.0330   | 0.6421      | 0.1007         | 0.5247      | 0.0031         | 0.5210      | 0.0009         | 0.6567      | 0.0796         | 0.5255      | 0.0014         | 0.5228      | 0.0039         | 0.6587      | 0.0769         | 0.5162      | 0.0199         | 0.5176      | 0.0047         |
| nccn     | 3.8062    | 0.0259 | 1.7242 | 1.4751   | 0.9992 | 0.5018   | 0.7465 | 0.1916   | 0.6706 | 0.0994   | 0.6939      | 0.0920         | 0.5621      | 0.0348         | 0.5910      | 0.0026         | 0.5755      | 0.0669         | 0.5666      | 0.0292         | 0.5984      | 0.0117         | 0.5600      | 0.0877         | 0.5155      | 0.0920         | 0.5771      | 0.0143         |
| nh2cl    | 0.7528    | 0.0004 | 0.2178 | 0.0303   | 0.2629 | 0.0140   | 0.2990 | 0.0030   | 0.3091 | 0.0016   | 0.2819      | 0.0326         | 0.3254      | 0.0050         | 0.3197      | 0.0000         | 0.2892      | 0.0399         | 0.3247      | 0.0048         | 0.3187      | 0.0002         | 0.2902      | 0.0408         | 0.3320      | 0.0070         | 0.3215      | 0.0002         |
| nh3      | 0.7791    | 0.0035 | 0.1817 | 0.1363   | 0.1520 | 0.0717   | 0.1153 | 0.0258   | 0.1061 | 0.0134   | 0.1396      | 0.0445         | 0.0886      | 0.0077         | 0.0964      | 0.0004         | 0.1347      | 0.0340         | 0.0892      | 0.0069         | 0.0973      | 0.0016         | 0.1341      | 0.0326         | 0.0818      | 0.0162         | 0.0947      | 0.0019         |
| ocs      | 2.0202    | 0.0109 | 1.0173 | 0.7462   | 0.5864 | 0.1881   | 0.5193 | 0.0809   | 0.4935 | 0.0419   | 0.4049      | 0.0468         | 0.4704      | 0.0026         | 0.4664      | 0.0011         | 0.3345      | 0.1380         | 0.4716      | 0.0045         | 0.4690      | 0.0049         | 0.3253      | 0.1499         | 0.4580      | 0.0172         | 0.4617      | 0.0060         |
| oxirene  | 2.6280    | 0.0126 | 1.0132 | 0.8623   | 0.5693 | 0.2592   | 0.4407 | 0.0933   | 0.4065 | 0.0484   | 0.3823      | 0.0052         | 0.3469      | 0.0277         | 0.3706      | 0.0013         | 0.3098      | 0.0932         | 0.3492      | 0.0247         | 0.3739      | 0.0057         | 0.3004      | 0.1061         | 0.3232      | 0.0583         | 0.3643      | 0.0069         |
| p2       | 0.9716    | 0.0004 | 1.0739 | 0.3914   | 0.8788 | 0.0054   | 0.9434 | 0.0030   | 0.9654 | 0.0016   | 0.7967      | 0.1571         | 0.9906      | 0.0092         | 0.9885      | 0.0000         | 0.7649      | 0.2202         | 0.9894      | 0.0090         | 0.9863      | 0.0002         | 0.7607      | 0.2284         | 1.0025      | 0.0107         | 0.9925      | 0.0002         |
| ph3      | 0.4547    | 0.0044 | 0.3889 | 0.2420   | 0.0813 | 0.0559   | 0.1227 | 0.0326   | 0.1444 | 0.0169   | 0.0482      | 0.1814         | 0.1529      | 0.0155         | 0.1671      | 0.0004         | 0.0985      | 0.2300         | 0.1521      | 0.0159         | 0.1650      | 0.0020         | 0.1050      | 0.2364         | 0.1605      | 0.0112         | 0.1711      | 0.0024         |
| sih3f    | 0.1712    | 0.0046 | 0.8794 | 0.8505   | 0.1181 | 0.1771   | 0.0167 | 0.0341   | 0.0281 | 0.0177   | 0.2025      | 0.1064         | 0.1150      | 0.0704         | 0.0401      | 0.0005         | 0.3268      | 0.2164         | 0.1126      | 0.0678         | 0.0390      | 0.0021         | 0.3431      | 0.2307         | 0.1398      | 0.0968         | 0.0422      | 0.0025         |
| sih4     | -0.0259   | 0.0020 | 0.7742 | 0.7605   | 0.0379 | 0.0649   | 0.1200 | 0.0149   | 0.1118 | 0.0077   | 0.3798      | 0.2280         | 0.1798      | 0.0731         | 0.1032      | 0.0002         | 0.5124      | 0.3416         | 0.1784      | 0.0717         | 0.1040      | 0.0009         | 0.5298      | 0.3564         | 0.1950      | 0.0878         | 0.1017      | 0.0011         |
| sio      | 1.1827    | 0.0207 | 1.1245 | 0.9235   | 0.6351 | 0.3571   | 0.4651 | 0.1534   | 0.4037 | 0.0795   | 0.4290      | 0.1186         | 0.3411      | 0.0047         | 0.3393      | 0.0021         | 0.3491      | 0.0261         | 0.3442      | 0.0084         | 0.3454      | 0.0093         | 0.3387      | 0.0140         | 0.3098      | 0.0329         | 0.3281      | 0.0114         |
| so2      | 1.2417    | 0.0020 | 0.7633 | 0.4062   | 0.5762 | 0.0507   | 0.5975 | 0.0147   | 0.6109 | 0.0076   | 0.4974      | 0.0989         | 0.6131      | 0.0116         | 0.6248      | 0.0002         | 0.4668      | 0.1570         | 0.6127      | 0.0110         | 0.6235      | 0.0009         | 0.4628      | 0.1646         | 0.6171      | 0.0183         | 0.6273      | 0.0011         |
| t-hcoh   | 1.0322    | 0.0049 | 0.3017 | 0.2260   | 0.2465 | 0.0966   | 0.2024 | 0.0364   | 0.1892 | 0.0189   | 0.2233      | 0.0421         | 0.1702      | 0.0075         | 0.1755      | 0.0005         | 0.2142      | 0.0210         | 0.1709      | 0.0065         | 0.1767      | 0.0022         | 0.2131      | 0.0182         | 0.1620      | 0.0186         | 0.1731      | 0.0027         |
| t-hono   | 0.8783    | 0.0027 | 0.1549 | 0.0520   | 0.4402 | 0.0419   | 0.4564 | 0.0199   | 0.4574 | 0.0103   | 0.5603      | 0.0814         | 0.4683      | 0.0038         | 0.4585      | 0.0003         | 0.6069      | 0.0967         | 0.4680      | 0.0042         | 0.4584      | 0.0012         | 0.6130      | 0.0987         | 0.4713      | 0.0002         | 0.4587      | 0.0015         |
| t-n2h2   | 1.0306    | 0.0044 | 0.2946 | 0.1412   | 0.3696 | 0.0842   | 0.3450 | 0.0322   | 0.3374 | 0.0167   | 0.4011      | 0.0602         | 0.3270      | 0.0058         | 0.3293      | 0.0004         | 0.4134      | 0.0509         | 0.3275      | 0.0049         | 0.3301      | 0.0020         | 0.4150      | 0.0497         | 0.3225      | 0.0154         | 0.3279      | 0.0024         |
| cch      | 2.2462    | 0.0148 | 1.1555 | 1.0685   | 0.4768 | 0.2999   | 0.3093 | 0.1092   | 0.2632 | 0.0567   | 0.1911      | 0.0237         | 0.1871      | 0.0299         | 0.2149      | 0.0015         | 0.0803      | 0.1492         | 0.1900      | 0.0265         | 0.2194      | 0.0066         | 0.0658      | 0.1656         | 0.1561      | 0.0650         | 0.2064      | 0.0081         |
| cf       | 0.4154    | 0.0018 | 0.1125 | 0.0657   | 0.1372 | 0.0384   | 0.1215 | 0.0130   | 0.1178 | 0.0067   | 0.1476      | 0.0269         | 0.1101      | 0.0056         | 0.1140      | 0.0002         | 0.1516      | 0.0225         | 0.1104      | 0.0051         | 0.1143      | 0.0008         | 0.1521      | 0.0219         | 0.1072      | 0.0103         | 0.1133      | 0.0010         |
| ch       | 0.1831    | 0.0007 | 0.0634 | 0.0342   | 0.0640 | 0.0164   | 0.0573 | 0.0055   | 0.0560 | 0.0028   | 0.0642      | 0.0089         | 0.0525      | 0.0025         | 0.0546      | 0.0001         | 0.0643      | 0.0060         | 0.0526      | 0.0024         | 0.0547      | 0.0003         | 0.0643      | 0.0057         | 0.0513      | 0.0046         | 0.0544      | 0.0004         |
| ch2ch    | 2.3096    | 0.0132 | 0.9871 | 0.9352   | 0.3703 | 0.2665   | 0.2179 | 0.0974   | 0.1758 | 0.0505   | 0.1106      | 0.0150         | 0.1067      | 0.0260         | 0.1316      | 0.0013         | 0.0099      | 0.1242         | 0.1094      | 0.0230         | 0.1358      | 0.0059         | 0.0033      | 0.1385         | 0.0785      | 0.0572         | 0.1240      | 0.0072         |
| ch2nh2   | 1.9804    | 0.0089 | 0.6256 | 0.5656   | 0.3021 | 0.1848   | 0.1999 | 0.0656   | 0.1737 | 0.0340   | 0.1659      | 0.0244         | 0.1253      | 0.0214         | 0.1461      | 0.0009         | 0.1131      | 0.0377         | 0.1271      | 0.0193         | 0.1487      | 0.0040         | 0.1062      | 0.0459         | 0.1064      | 0.0434         | 0.1413      | 0.0049         |
| ch3      | 1.1186    | 0.0059 | 0.4214 | 0.4236   | 0.1224 | 0.1234   | 0.0469 | 0.0437   | 0.0273 | 0.0227   | 0.0035      | 0.0030         | 0.0082      | 0.0145         | 0.0067      | 0.0006         | 0.0524      | 0.0520         | 0.0069      | 0.0130         | 0.0086      | 0.0027         | 0.0588      | 0.0584         | 0.0222      | 0.0292         | 0.0031      | 0.0033         |
| ch3nh    | 1.6877    | 0.0079 | 0.4965 | 0.4375   | 0.2704 | 0.1567   | 0.1889 | 0.0587   | 0.1659 | 0.0304   | 0.1753      | 0.0385         | 0.1294      | 0.0129         | 0.1417      | 0.0008         | 0.1383      | 0.0074         | 0.1309      | 0.0111         | 0.1440      | 0.0036         | 0.1335      | 0.0134         | 0.1144      | 0.0310         | 0.1375      | 0.0044         |

| System   | REFERENCE | RANGE      | SD/DZ  | SD(T)/DZ | SD/TZ  | SD(T)/TZ | SD/QZ  | SD(T)/QZ | SD/5Z  | SD(T)/5Z | SD/e1{D,T}Z | SD(T)/e1{D,T}Z | SD/e1{T,Q}Z | SD(T)/e1{T,Q}Z | SD/e1{Q,5}Z | SD(T)/e1{Q,5}Z | SD/e2{D,T}Z | SD(T)/e2{D,T}Z | SD/e2{T,Q}Z | SD(T)/e2{T,Q}Z | SD/e2{Q,5}Z | SD(T)/e2{Q,5}Z | SD/e3{D,T}Z | SD(T)/e3{D,T}Z | SD/e3{T,Q}Z | SD(T)/e3{T,Q}Z | SD/e3{Q,5}Z | SD(T)/e3{Q,5}Z |
|----------|-----------|------------|--------|----------|--------|----------|--------|----------|--------|----------|-------------|----------------|-------------|----------------|-------------|----------------|-------------|----------------|-------------|----------------|-------------|----------------|-------------|----------------|-------------|----------------|-------------|----------------|
| clo      | 0.3081    | 0.0044     | 0.1733 | 0.0365   | 0.2557 | 0.0660   | 0.3226 | 0.0324   | 0.3502 | 0.0168   | 0.2904      | 0.0784         | 0.3714      | 0.0079         | 0.3792      | 0.0004         | 0.3039      | 0.0833         | 0.3702      | 0.0085         | 0.3765      | 0.0020         | 0.3056      | 0.0839         | 0.3838      | 0.0017         | 0.3842      | 0.0024         |
| cn       | 1.4216    | 0.0299     | 0.8487 | 0.6861   | 0.6344 | 0.3707   | 0.4944 | 0.2213   | 0.3903 | 0.1148   | 0.5441      | 0.2378         | 0.3923      | 0.1123         | 0.2810      | 0.0030         | 0.5091      | 0.1863         | 0.3948      | 0.1150         | 0.2913      | 0.0135         | 0.5046      | 0.1796         | 0.3665      | 0.0848         | 0.2620      | 0.0165         |
| h2cn     | 1.6636    | 0.0097     | 0.6847 | 0.5867   | 0.3794 | 0.1926   | 0.2805 | 0.0719   | 0.2522 | 0.0373   | 0.2508      | 0.0267         | 0.2084      | 0.0162         | 0.2225      | 0.0010         | 0.2009      | 0.0376         | 0.2102      | 0.0141         | 0.2253      | 0.0044         | 0.1944      | 0.0460         | 0.1902      | 0.0385         | 0.2173      | 0.0054         |
| hcnh     | 1.6982    | 0.0095     | 0.6826 | 0.5856   | 0.3828 | 0.1923   | 0.2828 | 0.0702   | 0.2553 | 0.0364   | 0.2566      | 0.0267         | 0.2098      | 0.0189         | 0.2265      | 0.0010         | 0.2076      | 0.0376         | 0.2116      | 0.0168         | 0.2292      | 0.0043         | 0.2012      | 0.0460         | 0.1914      | 0.0415         | 0.2215      | 0.0052         |
| hco      | 1.3271    | 0.0085     | 0.5679 | 0.4919   | 0.3311 | 0.1681   | 0.2456 | 0.0629   | 0.2208 | 0.0326   | 0.2314      | 0.0317         | 0.1832      | 0.0138         | 0.1949      | 0.0009         | 0.1927      | 0.0212         | 0.1847      | 0.0119         | 0.1973      | 0.0038         | 0.1876      | 0.0281         | 0.1674      | 0.0332         | 0.1904      | 0.0047         |
| hoo      | 0.4157    | 0.0008     | 0.0547 | 0.0483   | 0.2108 | 0.0110   | 0.2247 | 0.0057   | 0.2272 | 0.0030   | 0.2765      | 0.0360         | 0.2349      | 0.0018         | 0.2298      | 0.0001         | 0.3020      | 0.0457         | 0.2347      | 0.0019         | 0.2295      | 0.0003         | 0.3054      | 0.0470         | 0.2375      | 0.0008         | 0.2302      | 0.0004         |
| hs       | 0.2276    | 0.0003     | 0.1425 | 0.0768   | 0.0526 | 0.0134   | 0.0699 | 0.0019   | 0.0728 | 0.0010   | 0.0148      | 0.0514         | 0.0825      | 0.0065         | 0.0758      | 0.0000         | 0.0001      | 0.0661         | 0.0822      | 0.0063         | 0.0755      | 0.0001         | 0.0018      | 0.0680         | 0.0857      | 0.0087         | 0.0763      | 0.0001         |
| n2h      | 1.0384    | 0.0055     | 0.3914 | 0.2460   | 0.3827 | 0.1080   | 0.3431 | 0.0409   | 0.3312 | 0.0212   | 0.3791      | 0.0499         | 0.3142      | 0.0081         | 0.3187      | 0.0006         | 0.3777      | 0.0274         | 0.3149      | 0.0069         | 0.3199      | 0.0025         | 0.3775      | 0.0244         | 0.3069      | 0.0205         | 0.3165      | 0.0030         |
| nh2      | 0.4227    | 0.0018     | 0.0765 | 0.0396   | 0.1041 | 0.0370   | 0.0881 | 0.0133   | 0.0845 | 0.0069   | 0.1157      | 0.0359         | 0.0764      | 0.0041         | 0.0807      | 0.0002         | 0.1202      | 0.0355         | 0.0767      | 0.0036         | 0.0811      | 0.0008         | 0.1208      | 0.0355         | 0.0735      | 0.0085         | 0.0801      | 0.0010         |
| no       | 0.6262    | 0.0033     | 0.2319 | 0.1016   | 0.3113 | 0.0598   | 0.3006 | 0.0242   | 0.2957 | 0.0126   | 0.3448      | 0.0423         | 0.2927      | 0.0018         | 0.2907      | 0.0003         | 0.3577      | 0.0354         | 0.2929      | 0.0012         | 0.2912      | 0.0015         | 0.3594      | 0.0345         | 0.2907      | 0.0084         | 0.2898      | 0.0018         |
| no2      | 1.0139    | 0.0038     | 0.2443 | 0.0424   | 0.4561 | 0.0621   | 0.4619 | 0.0280   | 0.4593 | 0.0145   | 0.5453      | 0.0703         | 0.4661      | 0.0032         | 0.4565      | 0.0004         | 0.5798      | 0.0735         | 0.4660      | 0.0038         | 0.4568      | 0.0017         | 0.5844      | 0.0739         | 0.4672      | 0.0031         | 0.4561      | 0.0021         |
| oh       | 0.2025    | 0.0008     | 0.0307 | 0.0101   | 0.0549 | 0.0152   | 0.0500 | 0.0057   | 0.0490 | 0.0029   | 0.0651      | 0.0174         | 0.0464      | 0.0013         | 0.0478      | 0.0001         | 0.0691      | 0.0183         | 0.0465      | 0.0012         | 0.0479      | 0.0003         | 0.0696      | 0.0184         | 0.0455      | 0.0031         | 0.0476      | 0.0004         |
| sif      | 0.4928    | 0.0090     | 0.3769 | 0.3114   | 0.2382 | 0.1532   | 0.1693 | 0.0663   | 0.1441 | 0.0344   | 0.1798      | 0.0866         | 0.1190      | 0.0029         | 0.1177      | 0.0009         | 0.1572      | 0.0608         | 0.1203      | 0.0044         | 0.1201      | 0.0040         | 0.1542      | 0.0574         | 0.1063      | 0.0132         | 0.1130      | 0.0049         |
| sih      | 0.0274    | 0.0006     | 0.1542 | 0.0839   | 0.0673 | 0.0032   | 0.0751 | 0.0044   | 0.0803 | 0.0023   | 0.0307      | 0.0399         | 0.0808      | 0.0052         | 0.0858      | 0.0001         | 0.0165      | 0.0541         | 0.0807      | 0.0052         | 0.0853      | 0.0003         | 0.0147      | 0.0560         | 0.0823      | 0.0054         | 0.0868      | 0.0003         |
| ssh      | 0.6532    | 0.0063     | 0.4636 | 0.1341   | 0.2604 | 0.1390   | 0.3844 | 0.0463   | 0.4163 | 0.0240   | 0.1748      | 0.2540         | 0.4749      | 0.0214         | 0.4498      | 0.0006         | 0.1416      | 0.2986         | 0.4727      | 0.0198         | 0.4466      | 0.0028         | 0.1372      | 0.3045         | 0.4978      | 0.0386         | 0.4556      | 0.0034         |
| ch2-trip | 0.8449    | 0.0047     | 0.3538 | 0.3714   | 0.0714 | 0.0998   | 0.0077 | 0.0349   | 0.0084 | 0.0181   | 0.0475      | 0.0146         | 0.0388      | 0.0125         | 0.0252      | 0.0005         | 0.0936      | 0.0589         | 0.0376      | 0.0114         | 0.0236      | 0.0021         | 0.0996      | 0.0647         | 0.0505      | 0.0245         | 0.0282      | 0.0026         |
| nh       | 0.1644    | 0.0005     | 0.0122 | 0.0093   | 0.0517 | 0.0112   | 0.0489 | 0.0037   | 0.0489 | 0.0019   | 0.0684      | 0.0198         | 0.0469      | 0.0018         | 0.0488      | 0.0001         | 0.0748      | 0.0232         | 0.0469      | 0.0016         | 0.0488      | 0.0002         | 0.0757      | 0.0236         | 0.0464      | 0.0032         | 0.0487      | 0.0003         |
| o2       | 0.3716    | 0.0013     | 0.1092 | 0.0056   | 0.2139 | 0.0159   | 0.2265 | 0.0093   | 0.2270 | 0.0048   | 0.2579      | 0.0203         | 0.2357      | 0.0044         | 0.2275      | 0.0001         | 0.2750      | 0.0220         | 0.2355      | 0.0045         | 0.2274      | 0.0006         | 0.2773      | 0.0222         | 0.2380      | 0.0032         | 0.2276      | 0.0007         |
| s2       | 0.6492    | 0.0032     | 0.5732 | 0.2087   | 0.3809 | 0.0781   | 0.4729 | 0.0238   | 0.4958 | 0.0123   | 0.2999      | 0.1989         | 0.5400      | 0.0159         | 0.5198      | 0.0003         | 0.2685      | 0.2458         | 0.5383      | 0.0149         | 0.5176      | 0.0014         | 0.2644      | 0.2519         | 0.5570      | 0.0259         | 0.5240      | 0.0018         |
| so       | 0.6357    | 0.0014     | 0.4167 | 0.2229   | 0.2926 | 0.0349   | 0.2948 | 0.0103   | 0.2995 | 0.0053   | 0.2403      | 0.0442         | 0.2964      | 0.0077         | 0.3044      | 0.0001         | 0.2200      | 0.0749         | 0.2964      | 0.0073         | 0.3039      | 0.0006         | 0.2174      | 0.0789         | 0.2968      | 0.0122         | 0.3052      | 0.0008         |
|          |           | <b>MAX</b> | 1.7242 | 1.4751   | 0.9992 | 0.5018   | 0.9434 | 0.2213   | 0.9654 | 0.1148   | 0.7967      | 0.2540         | 0.9906      | 0.1123         | 0.9885      | 0.0030         | 0.7649      | 0.3416         | 0.9894      | 0.1150         | 0.9863      | 0.0135         | 0.7607      | 0.3564         | 1.0025      | 0.0968         | 0.9925      | 0.0165         |
|          |           | <b>MAD</b> | 0.5244 | 0.4090   | 0.3390 | 0.1381   | 0.2918 | 0.0533   | 0.2773 | 0.0276   | 0.2833      | 0.0638         | 0.2611      | 0.0139         | 0.2623      | 0.0007         | 0.2661      | 0.0761         | 0.2618      | 0.0128         | 0.2637      | 0.0032         | 0.2641      | 0.0799         | 0.2537      | 0.0275         | 0.2597      | 0.0040         |
|          |           | <b>RMS</b> | 0.6463 | 0.5368   | 0.3943 | 0.1760   | 0.3405 | 0.0696   | 0.3259 | 0.0361   | 0.3299      | 0.0835         | 0.3127      | 0.0212         | 0.3127      | 0.0009         | 0.3177      | 0.1054         | 0.3132      | 0.0202         | 0.3139      | 0.0042         | 0.3167      | 0.1105         | 0.3076      | 0.0360         | 0.3107      | 0.0052         |
|          |           | <b>SD</b>  | 0.3798 | 0.3496   | 0.2024 | 0.1096   | 0.1764 | 0.0450   | 0.1721 | 0.0234   | 0.1699      | 0.0541         | 0.1730      | 0.0161         | 0.1712      | 0.0006         | 0.1744      | 0.0733         | 0.1729      | 0.0158         | 0.1711      | 0.0027         | 0.1757      | 0.0767         | 0.1748      | 0.0234         | 0.1714      | 0.0034         |

Table S2. Differences between absolute deviations obtained at given levels of theory in kcal mol<sup>-1</sup>. Reference values are computed as the mean of SD(T)/eN{Q,5}Z (N = 1 – 3) values. Positive values are highlighted in red. Maximum (MAX), mean (MAD), root mean square (RMS), and standard deviation (SD) are provided at the bottom of the Table.

| System   | SD(T)/DZ<br>–<br>SD/TZ | SD(T)/TZ<br>–<br>SD/QZ | SD(T)/QZ<br>–<br>SD/5Z | SD(T)/e1{D,T}Z<br>–<br>SD/e1{T,Q}Z | SD(T)/e1{T,Q}Z<br>–<br>SD/e1{Q,5}Z | SD(T)/e2{D,T}Z<br>–<br>SD/e2{T,Q}Z | SD(T)/e2{T,Q}Z<br>–<br>SD/e2{Q,5}Z | SD(T)/e3{D,T}Z<br>–<br>SD/e3{T,Q}Z | SD(T)/e3{T,Q}Z<br>–<br>SD/e3{Q,5}Z |
|----------|------------------------|------------------------|------------------------|------------------------------------|------------------------------------|------------------------------------|------------------------------------|------------------------------------|------------------------------------|
| alcl     | -0.0387                | -0.1386                | -0.1715                | -0.1731                            | -0.1795                            | -0.1653                            | -0.1807                            | -0.1577                            | -0.1716                            |
| alf      | 0.3347                 | 0.0648                 | -0.0478                | 0.0003                             | -0.1091                            | -0.0726                            | -0.1123                            | -0.0496                            | -0.1092                            |
| alh      | 0.0246                 | -0.0849                | -0.1095                | -0.0880                            | -0.1069                            | -0.0681                            | -0.1074                            | -0.0626                            | -0.1023                            |
| alh3     | 0.6219                 | -0.1275                | -0.2393                | -0.1907                            | -0.2778                            | -0.0840                            | -0.2771                            | -0.0920                            | -0.2658                            |
| bf       | 0.1667                 | 0.0348                 | -0.0386                | 0.0070                             | -0.0504                            | -0.0308                            | -0.0545                            | -0.0174                            | -0.0280                            |
| bh       | 0.0388                 | -0.0401                | -0.0553                | -0.0480                            | -0.0580                            | -0.0331                            | -0.0586                            | -0.0283                            | -0.0539                            |
| bh3      | 0.6026                 | 0.1224                 | -0.0048                | -0.0447                            | -0.0662                            | 0.0414                             | -0.0654                            | 0.0318                             | -0.0522                            |
| c2h2     | 0.6688                 | 0.0326                 | -0.1281                | -0.1595                            | -0.1658                            | -0.0277                            | -0.1749                            | 0.0287                             | -0.1163                            |
| c2h3f    | 0.4301                 | -0.0332                | -0.1660                | -0.1819                            | -0.2013                            | -0.1279                            | -0.2086                            | -0.0844                            | -0.1610                            |
| c2h4     | 0.5635                 | 0.0455                 | -0.0870                | -0.1143                            | -0.1173                            | -0.0065                            | -0.1249                            | 0.0402                             | -0.0764                            |
| ccl2     | -0.3293                | -0.3840                | -0.4893                | -0.4078                            | -0.4910                            | -0.3821                            | -0.4904                            | -0.4025                            | -0.4796                            |
| cf2      | -0.1934                | -0.1847                | -0.2067                | -0.1520                            | -0.2148                            | -0.1408                            | -0.2154                            | -0.1383                            | -0.2102                            |
| ch2c     | 0.4265                 | -0.0113                | -0.1245                | -0.1485                            | -0.1504                            | -0.0581                            | -0.1566                            | -0.0196                            | -0.1163                            |
| ch2nh    | 0.1727                 | -0.0947                | -0.1868                | -0.1769                            | -0.2139                            | -0.1974                            | -0.2188                            | -0.1697                            | -0.1864                            |
| ch2–sing | 0.0062                 | -0.0493                | -0.0737                | -0.0650                            | -0.0785                            | -0.0786                            | -0.0797                            | -0.0743                            | -0.0715                            |
| ch3f     | 0.1125                 | -0.0221                | -0.0789                | -0.0598                            | -0.0955                            | -0.0929                            | -0.0986                            | -0.0846                            | -0.0786                            |
| ch3nh2   | 0.1869                 | -0.0318                | -0.1179                | -0.0944                            | -0.1432                            | -0.1436                            | -0.1479                            | -0.1177                            | -0.1174                            |
| ch4      | 0.3001                 | 0.0718                 | 0.0035                 | 0.0022                             | -0.0099                            | 0.0277                             | -0.0138                            | 0.0399                             | 0.0114                             |
| c–hcoh   | -0.0431                | -0.1121                | -0.1565                | -0.1284                            | -0.1734                            | -0.1471                            | -0.1757                            | -0.1411                            | -0.1604                            |
| c–hono   | -0.3742                | -0.4036                | -0.4252                | -0.3716                            | -0.4409                            | -0.3547                            | -0.4405                            | -0.3556                            | -0.4449                            |
| cl2      | -0.2065                | -0.2326                | -0.3432                | -0.2759                            | -0.4169                            | -0.2612                            | -0.4152                            | -0.2807                            | -0.4083                            |
| clcn     | 0.1472                 | -0.3350                | -0.4019                | -0.3768                            | -0.4443                            | -0.2904                            | -0.4447                            | -0.2685                            | -0.4280                            |
| clf      | -0.0648                | -0.1646                | -0.2338                | -0.2268                            | -0.2921                            | -0.2312                            | -0.2889                            | -0.2452                            | -0.2931                            |



| System           | $\frac{SD(T)/DZ}{-SD/TZ}$ | $\frac{SD(T)/TZ}{-SD/QZ}$ | $\frac{SD(T)/QZ}{-SD/5Z}$ | $\frac{SD(T)/e1\{D,T\}Z}{-SD/e1\{T,Q\}Z}$ | $\frac{SD(T)/e1\{T,Q\}Z}{-SD/e1\{Q,5\}Z}$ | $\frac{SD(T)/e2\{D,T\}Z}{-SD/e2\{T,Q\}Z}$ | $\frac{SD(T)/e2\{T,Q\}Z}{-SD/e2\{Q,5\}Z}$ | $\frac{SD(T)/e3\{D,T\}Z}{-SD/e3\{T,Q\}Z}$ | $\frac{SD(T)/e3\{T,Q\}Z}{-SD/e3\{Q,5\}Z}$ |
|------------------|---------------------------|---------------------------|---------------------------|-------------------------------------------|-------------------------------------------|-------------------------------------------|-------------------------------------------|-------------------------------------------|-------------------------------------------|
| <b>c-n2h2</b>    | -0.2480                   | -0.2678                   | -0.3087                   | -0.2693                                   | -0.3301                                   | -0.2766                                   | -0.3318                                   | -0.2730                                   | -0.3195                                   |
| <b>co</b>        | 0.1335                    | -0.0871                   | -0.1699                   | -0.1523                                   | -0.1991                                   | -0.2014                                   | -0.2037                                   | -0.1766                                   | -0.1736                                   |
| <b>co2</b>       | 0.1484                    | -0.1458                   | -0.2678                   | -0.2289                                   | -0.3178                                   | -0.3008                                   | -0.3249                                   | -0.2832                                   | -0.2797                                   |
| <b>cs</b>        | -0.0192                   | -0.4246                   | -0.4736                   | -0.4838                                   | -0.5046                                   | -0.4145                                   | -0.5049                                   | -0.4012                                   | -0.5137                                   |
| <b>cs2</b>       | 0.0586                    | -0.6182                   | -0.6718                   | -0.5256                                   | -0.7105                                   | -0.4151                                   | -0.7097                                   | -0.4007                                   | -0.7031                                   |
| <b>dioxirane</b> | -0.2641                   | -0.3180                   | -0.3669                   | -0.3342                                   | -0.3917                                   | -0.3469                                   | -0.3935                                   | -0.3442                                   | -0.3799                                   |
| <b>f2</b>        | -0.1102                   | -0.2239                   | -0.2449                   | -0.2519                                   | -0.2605                                   | -0.2379                                   | -0.2598                                   | -0.2426                                   | -0.2599                                   |
| <b>f2co</b>      | -0.1202                   | -0.2094                   | -0.2924                   | -0.2237                                   | -0.3283                                   | -0.2520                                   | -0.3326                                   | -0.2402                                   | -0.3038                                   |
| <b>fccf</b>      | 0.5031                    | -0.1168                   | -0.2913                   | -0.3186                                   | -0.3402                                   | -0.2407                                   | -0.3497                                   | -0.1846                                   | -0.2876                                   |
| <b>formic</b>    | 0.0236                    | -0.1539                   | -0.2456                   | -0.1999                                   | -0.2837                                   | -0.2457                                   | -0.2888                                   | -0.2326                                   | -0.2558                                   |
| <b>h2co</b>      | 0.1254                    | -0.0897                   | -0.1684                   | -0.1543                                   | -0.1947                                   | -0.1922                                   | -0.1991                                   | -0.1689                                   | -0.1709                                   |
| <b>h2o</b>       | -0.0366                   | -0.0429                   | -0.0634                   | -0.0398                                   | -0.0713                                   | -0.0442                                   | -0.0723                                   | -0.0410                                   | -0.0657                                   |
| <b>h2s</b>       | 0.0731                    | -0.1092                   | -0.1315                   | -0.0429                                   | -0.1385                                   | -0.0096                                   | -0.1382                                   | -0.0104                                   | -0.1367                                   |
| <b>hccf</b>      | 0.5762                    | -0.0403                   | -0.2063                   | -0.2410                                   | -0.2518                                   | -0.1401                                   | -0.2612                                   | -0.0842                                   | -0.2009                                   |
| <b>hcl</b>       | 0.0100                    | -0.0828                   | -0.0796                   | -0.0524                                   | -0.0759                                   | -0.0381                                   | -0.0760                                   | -0.0379                                   | -0.0749                                   |
| <b>hcn</b>       | 0.2941                    | -0.0983                   | -0.2226                   | -0.2214                                   | -0.2585                                   | -0.2176                                   | -0.2653                                   | -0.1787                                   | -0.2209                                   |
| <b>hcno</b>      | 0.1337                    | -0.2405                   | -0.3792                   | -0.3556                                   | -0.4263                                   | -0.4264                                   | -0.4336                                   | -0.3875                                   | -0.3854                                   |
| <b>hf</b>        | -0.0201                   | -0.0301                   | -0.0388                   | -0.0326                                   | -0.0430                                   | -0.0353                                   | -0.0434                                   | -0.0345                                   | -0.0409                                   |
| <b>hnc</b>       | 0.2080                    | -0.0832                   | -0.1873                   | -0.1706                                   | -0.2158                                   | -0.2018                                   | -0.2215                                   | -0.1702                                   | -0.1846                                   |
| <b>hnco</b>      | 0.1994                    | -0.1431                   | -0.2821                   | -0.2410                                   | -0.3301                                   | -0.3241                                   | -0.3378                                   | -0.3042                                   | -0.2877                                   |
| <b>hnnn</b>      | -0.2376                   | -0.3881                   | -0.4809                   | -0.4304                                   | -0.5206                                   | -0.4674                                   | -0.5248                                   | -0.4582                                   | -0.4952                                   |
| <b>hno</b>       | -0.3075                   | -0.2867                   | -0.3095                   | -0.2784                                   | -0.3257                                   | -0.2747                                   | -0.3254                                   | -0.2746                                   | -0.3215                                   |
| <b>hocl</b>      | -0.1786                   | -0.2437                   | -0.2907                   | -0.2877                                   | -0.3289                                   | -0.2886                                   | -0.3276                                   | -0.2997                                   | -0.3269                                   |
| <b>hocn</b>      | 0.1792                    | -0.1788                   | -0.3121                   | -0.2862                                   | -0.3596                                   | -0.3622                                   | -0.3670                                   | -0.3231                                   | -0.3191                                   |
| <b>hof</b>       | -0.1281                   | -0.2304                   | -0.2360                   | -0.2088                                   | -0.2419                                   | -0.1946                                   | -0.2414                                   | -0.1967                                   | -0.2429                                   |
| <b>honc</b>      | -0.0084                   | -0.2357                   | -0.3367                   | -0.3021                                   | -0.3760                                   | -0.3564                                   | -0.3812                                   | -0.3441                                   | -0.3463                                   |
| <b>hooh</b>      | -0.2038                   | -0.2224                   | -0.2392                   | -0.1978                                   | -0.2517                                   | -0.1865                                   | -0.2513                                   | -0.1862                                   | -0.2497                                   |

| System   | $\frac{SD(T)/DZ}{-SD/TZ}$ | $\frac{SD(T)/TZ}{-SD/QZ}$ | $\frac{SD(T)/QZ}{-SD/5Z}$ | $\frac{SD(T)/e1\{D,T\}Z}{-SD/e1\{T,Q\}Z}$ | $\frac{SD(T)/e1\{T,Q\}Z}{-SD/e1\{Q,5\}Z}$ | $\frac{SD(T)/e2\{D,T\}Z}{-SD/e2\{T,Q\}Z}$ | $\frac{SD(T)/e2\{T,Q\}Z}{-SD/e2\{Q,5\}Z}$ | $\frac{SD(T)/e3\{D,T\}Z}{-SD/e3\{T,Q\}Z}$ | $\frac{SD(T)/e3\{T,Q\}Z}{-SD/e3\{Q,5\}Z}$ |
|----------|---------------------------|---------------------------|---------------------------|-------------------------------------------|-------------------------------------------|-------------------------------------------|-------------------------------------------|-------------------------------------------|-------------------------------------------|
| ketene   | 0.5167                    | -0.0389                   | -0.2042                   | -0.2138                                   | -0.2550                                   | -0.1833                                   | -0.2645                                   | -0.1287                                   | -0.2036                                   |
| methanol | 0.1231                    | -0.0365                   | -0.1052                   | -0.0806                                   | -0.1285                                   | -0.1203                                   | -0.1323                                   | -0.1101                                   | -0.1077                                   |
| n2       | -0.0573                   | -0.2322                   | -0.3074                   | -0.2861                                   | -0.3361                                   | -0.3263                                   | -0.3398                                   | -0.3184                                   | -0.3150                                   |
| n2h4     | -0.1281                   | -0.1611                   | -0.2153                   | -0.1617                                   | -0.2346                                   | -0.1749                                   | -0.2369                                   | -0.1678                                   | -0.2202                                   |
| n2o      | -0.3203                   | -0.4033                   | -0.4765                   | -0.4240                                   | -0.5179                                   | -0.4459                                   | -0.5213                                   | -0.4393                                   | -0.4977                                   |
| nccn     | 0.4760                    | -0.2447                   | -0.4790                   | -0.4701                                   | -0.5562                                   | -0.4997                                   | -0.5692                                   | -0.4278                                   | -0.4851                                   |
| nh2cl    | -0.2326                   | -0.2850                   | -0.3061                   | -0.2927                                   | -0.3147                                   | -0.2849                                   | -0.3139                                   | -0.2912                                   | -0.3145                                   |
| nh3      | -0.0157                   | -0.0436                   | -0.0803                   | -0.0440                                   | -0.0887                                   | -0.0552                                   | -0.0904                                   | -0.0492                                   | -0.0785                                   |
| ocs      | 0.1599                    | -0.3312                   | -0.4126                   | -0.4235                                   | -0.4638                                   | -0.3336                                   | -0.4644                                   | -0.3081                                   | -0.4445                                   |
| oxirene  | 0.2930                    | -0.1816                   | -0.3132                   | -0.3417                                   | -0.3429                                   | -0.2560                                   | -0.3492                                   | -0.2171                                   | -0.3061                                   |
| p2       | -0.4874                   | -0.9380                   | -0.9624                   | -0.8335                                   | -0.9793                                   | -0.7693                                   | -0.9773                                   | -0.7741                                   | -0.9818                                   |
| ph3      | 0.1607                    | -0.0667                   | -0.1118                   | 0.0285                                    | -0.1516                                   | 0.0779                                    | -0.1490                                   | 0.0759                                    | -0.1599                                   |
| sih3f    | 0.7324                    | 0.1605                    | 0.0059                    | -0.0086                                   | 0.0302                                    | 0.1038                                    | 0.0288                                    | 0.0909                                    | 0.0546                                    |
| sih4     | 0.7226                    | -0.0551                   | -0.0969                   | 0.0482                                    | -0.0301                                   | 0.1632                                    | -0.0323                                   | 0.1615                                    | -0.0139                                   |
| sio      | 0.2884                    | -0.1080                   | -0.2504                   | -0.2225                                   | -0.3346                                   | -0.3180                                   | -0.3370                                   | -0.2957                                   | -0.2952                                   |
| so2      | -0.1700                   | -0.5468                   | -0.5962                   | -0.5142                                   | -0.6132                                   | -0.4558                                   | -0.6126                                   | -0.4525                                   | -0.6090                                   |
| t-hcoh   | -0.0205                   | -0.1058                   | -0.1528                   | -0.1280                                   | -0.1679                                   | -0.1500                                   | -0.1703                                   | -0.1438                                   | -0.1544                                   |
| t-hono   | -0.3882                   | -0.4146                   | -0.4376                   | -0.3869                                   | -0.4547                                   | -0.3713                                   | -0.4542                                   | -0.3726                                   | -0.4584                                   |
| t-n2h2   | -0.2284                   | -0.2608                   | -0.3052                   | -0.2668                                   | -0.3236                                   | -0.2766                                   | -0.3252                                   | -0.2728                                   | -0.3126                                   |
| cch      | 0.5916                    | -0.0094                   | -0.1540                   | -0.1633                                   | -0.1850                                   | -0.0408                                   | -0.1929                                   | 0.0095                                    | -0.1414                                   |
| cf       | -0.0715                   | -0.0831                   | -0.1048                   | -0.0831                                   | -0.1084                                   | -0.0879                                   | -0.1092                                   | -0.0853                                   | -0.1030                                   |
| ch       | -0.0298                   | -0.0409                   | -0.0506                   | -0.0436                                   | -0.0521                                   | -0.0466                                   | -0.0524                                   | -0.0456                                   | -0.0498                                   |
| ch2ch    | 0.5650                    | 0.0486                    | -0.0784                   | -0.0916                                   | -0.1056                                   | 0.0148                                    | -0.1128                                   | 0.0600                                    | -0.0667                                   |
| ch2nh2   | 0.2635                    | -0.0151                   | -0.1081                   | -0.1008                                   | -0.1247                                   | -0.0894                                   | -0.1294                                   | -0.0605                                   | -0.0979                                   |
| ch3      | 0.3012                    | 0.0765                    | 0.0164                    | -0.0053                                   | 0.0077                                    | 0.0451                                    | 0.0044                                    | 0.0362                                    | 0.0260                                    |
| ch3nh    | 0.1670                    | -0.0322                   | -0.1072                   | -0.0909                                   | -0.1289                                   | -0.1235                                   | -0.1329                                   | -0.1010                                   | -0.1066                                   |
| clo      | -0.2192                   | -0.2566                   | -0.3178                   | -0.2930                                   | -0.3713                                   | -0.2870                                   | -0.3680                                   | -0.2999                                   | -0.3825                                   |

| System   | $\frac{SD(T)/DZ}{-SD/TZ}$ | $\frac{SD(T)/TZ}{-SD/QZ}$ | $\frac{SD(T)/QZ}{-SD/5Z}$ | $\frac{SD(T)/e1\{D,T\}Z}{-SD/e1\{T,Q\}Z}$ | $\frac{SD(T)/e1\{T,Q\}Z}{-SD/e1\{Q,5\}Z}$ | $\frac{SD(T)/e2\{D,T\}Z}{-SD/e2\{T,Q\}Z}$ | $\frac{SD(T)/e2\{T,Q\}Z}{-SD/e2\{Q,5\}Z}$ | $\frac{SD(T)/e3\{D,T\}Z}{-SD/e3\{T,Q\}Z}$ | $\frac{SD(T)/e3\{T,Q\}Z}{-SD/e3\{Q,5\}Z}$ |
|----------|---------------------------|---------------------------|---------------------------|-------------------------------------------|-------------------------------------------|-------------------------------------------|-------------------------------------------|-------------------------------------------|-------------------------------------------|
| cn       | 0.0517                    | -0.1238                   | -0.1690                   | -0.1545                                   | -0.1687                                   | -0.2085                                   | -0.1763                                   | -0.1869                                   | -0.1772                                   |
| h2cn     | 0.2073                    | -0.0879                   | -0.1803                   | -0.1817                                   | -0.2063                                   | -0.1726                                   | -0.2112                                   | -0.1442                                   | -0.1788                                   |
| hcnh     | 0.2028                    | -0.0905                   | -0.1852                   | -0.1832                                   | -0.2076                                   | -0.1740                                   | -0.2125                                   | -0.1454                                   | -0.1800                                   |
| hco      | 0.1608                    | -0.0775                   | -0.1579                   | -0.1515                                   | -0.1811                                   | -0.1636                                   | -0.1854                                   | -0.1394                                   | -0.1572                                   |
| hoo      | -0.1625                   | -0.2137                   | -0.2215                   | -0.1989                                   | -0.2279                                   | -0.1889                                   | -0.2276                                   | -0.1905                                   | -0.2294                                   |
| hs       | 0.0241                    | -0.0565                   | -0.0709                   | -0.0312                                   | -0.0692                                   | -0.0161                                   | -0.0692                                   | -0.0177                                   | -0.0676                                   |
| n2h      | -0.1368                   | -0.2351                   | -0.2903                   | -0.2643                                   | -0.3106                                   | -0.2876                                   | -0.3130                                   | -0.2825                                   | -0.2961                                   |
| nh2      | -0.0645                   | -0.0511                   | -0.0712                   | -0.0405                                   | -0.0767                                   | -0.0412                                   | -0.0775                                   | -0.0380                                   | -0.0716                                   |
| no       | -0.2097                   | -0.2407                   | -0.2715                   | -0.2504                                   | -0.2889                                   | -0.2575                                   | -0.2900                                   | -0.2562                                   | -0.2814                                   |
| no2      | -0.4137                   | -0.3998                   | -0.4313                   | -0.3958                                   | -0.4534                                   | -0.3925                                   | -0.4530                                   | -0.3933                                   | -0.4529                                   |
| oh       | -0.0449                   | -0.0348                   | -0.0433                   | -0.0290                                   | -0.0465                                   | -0.0282                                   | -0.0468                                   | -0.0271                                   | -0.0446                                   |
| sif      | 0.0732                    | -0.0161                   | -0.0778                   | -0.0324                                   | -0.1148                                   | -0.0595                                   | -0.1157                                   | -0.0489                                   | -0.0998                                   |
| sih      | 0.0166                    | -0.0719                   | -0.0760                   | -0.0409                                   | -0.0806                                   | -0.0265                                   | -0.0801                                   | -0.0263                                   | -0.0813                                   |
| ssh      | -0.1262                   | -0.2454                   | -0.3700                   | -0.2208                                   | -0.4283                                   | -0.1740                                   | -0.4269                                   | -0.1933                                   | -0.4170                                   |
| ch2-trip | 0.3000                    | 0.0920                    | 0.0265                    | -0.0242                                   | -0.0127                                   | 0.0213                                    | -0.0123                                   | 0.0142                                    | -0.0037                                   |
| nh       | -0.0424                   | -0.0377                   | -0.0452                   | -0.0271                                   | -0.0470                                   | -0.0238                                   | -0.0471                                   | -0.0228                                   | -0.0456                                   |
| o2       | -0.2082                   | -0.2105                   | -0.2177                   | -0.2154                                   | -0.2231                                   | -0.2135                                   | -0.2229                                   | -0.2158                                   | -0.2244                                   |
| s2       | -0.1722                   | -0.3947                   | -0.4720                   | -0.3411                                   | -0.5039                                   | -0.2926                                   | -0.5026                                   | -0.3051                                   | -0.4981                                   |
| so       | -0.0696                   | -0.2598                   | -0.2892                   | -0.2522                                   | -0.2967                                   | -0.2214                                   | -0.2967                                   | -0.2179                                   | -0.2930                                   |
| MAX      | 0.4760                    | -0.4416                   | -0.7441                   | -0.7366                                   | -0.8762                                   | -0.6479                                   | -0.8713                                   | -0.6461                                   | -0.8958                                   |
| MAD      | 0.0700                    | -0.1536                   | -0.2240                   | -0.1972                                   | -0.2484                                   | -0.1857                                   | -0.2509                                   | -0.1739                                   | -0.2322                                   |
| RMS      | 0.1425                    | -0.1645                   | -0.2563                   | -0.2292                                   | -0.2915                                   | -0.2078                                   | -0.2936                                   | -0.1972                                   | -0.2747                                   |
| SD       | 0.1472                    | -0.0668                   | -0.1270                   | -0.1189                                   | -0.1550                                   | -0.0996                                   | -0.1553                                   | -0.0981                                   | -0.1480                                   |

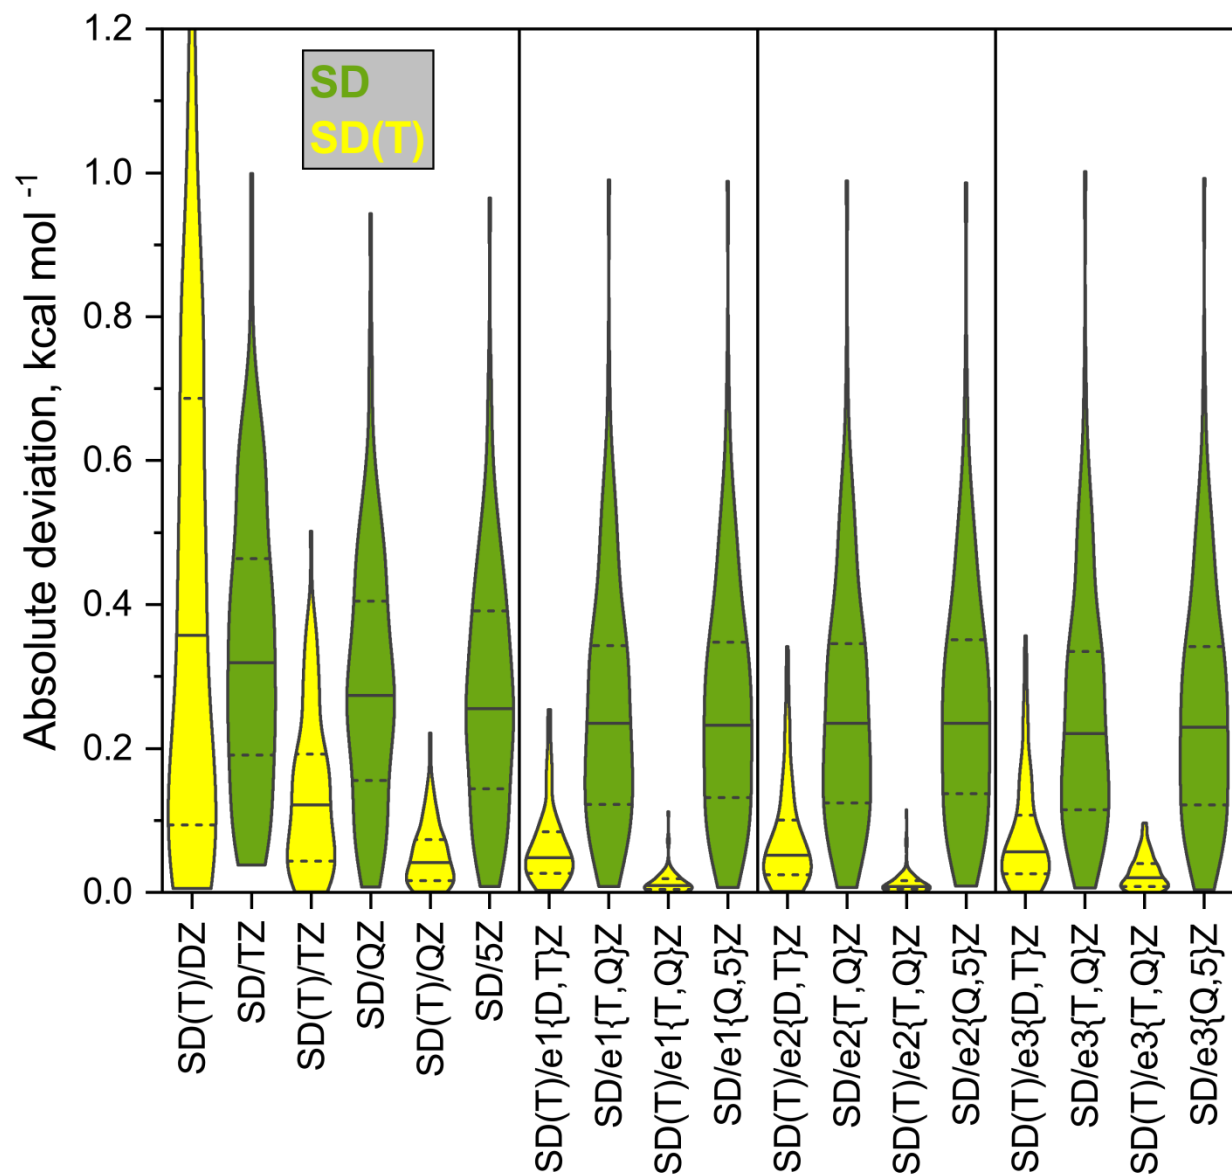

Figure S1. Violin plots of the absolute deviations obtained at a given level of theory. Reference values are computed as the mean of SD(T)/eN{Q,5}Z (N = 1 – 3) values. The median (solid), 25<sup>th</sup>, and 75<sup>th</sup> percentiles (dash) are shown. The highest point of a plot represents the maximum deviation.

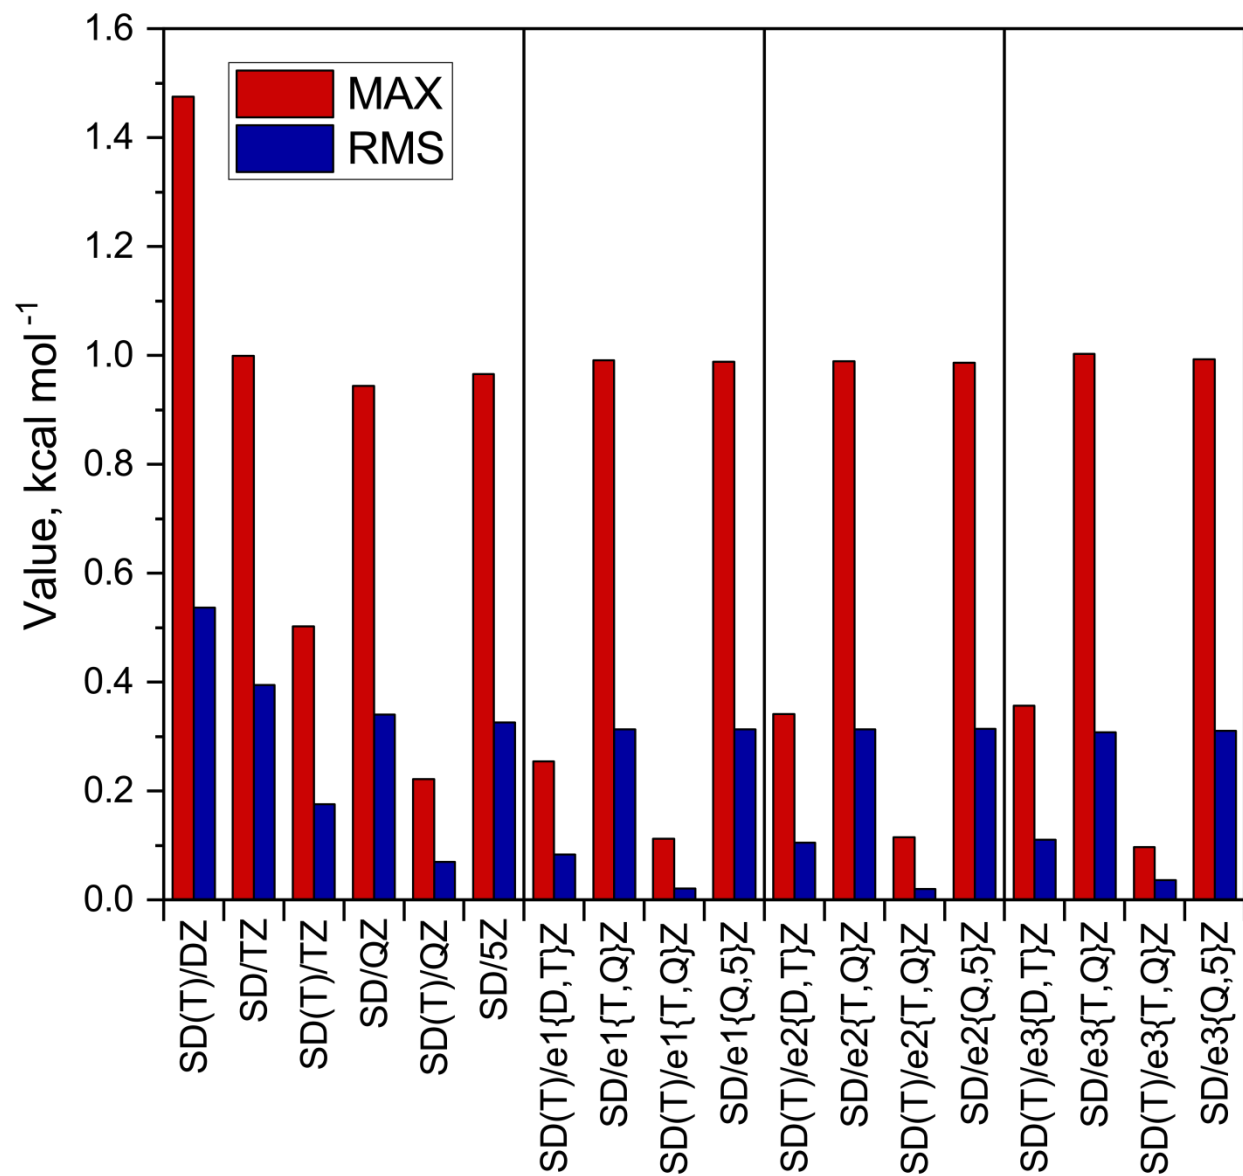

Figure S2. Maximum (MAX) and root mean square (RMS) values for the absolute deviations obtained at a given level of theory. Reference values are computed as the mean of SD(T)/eN{Q,5}Z (N = 1 – 3) values.

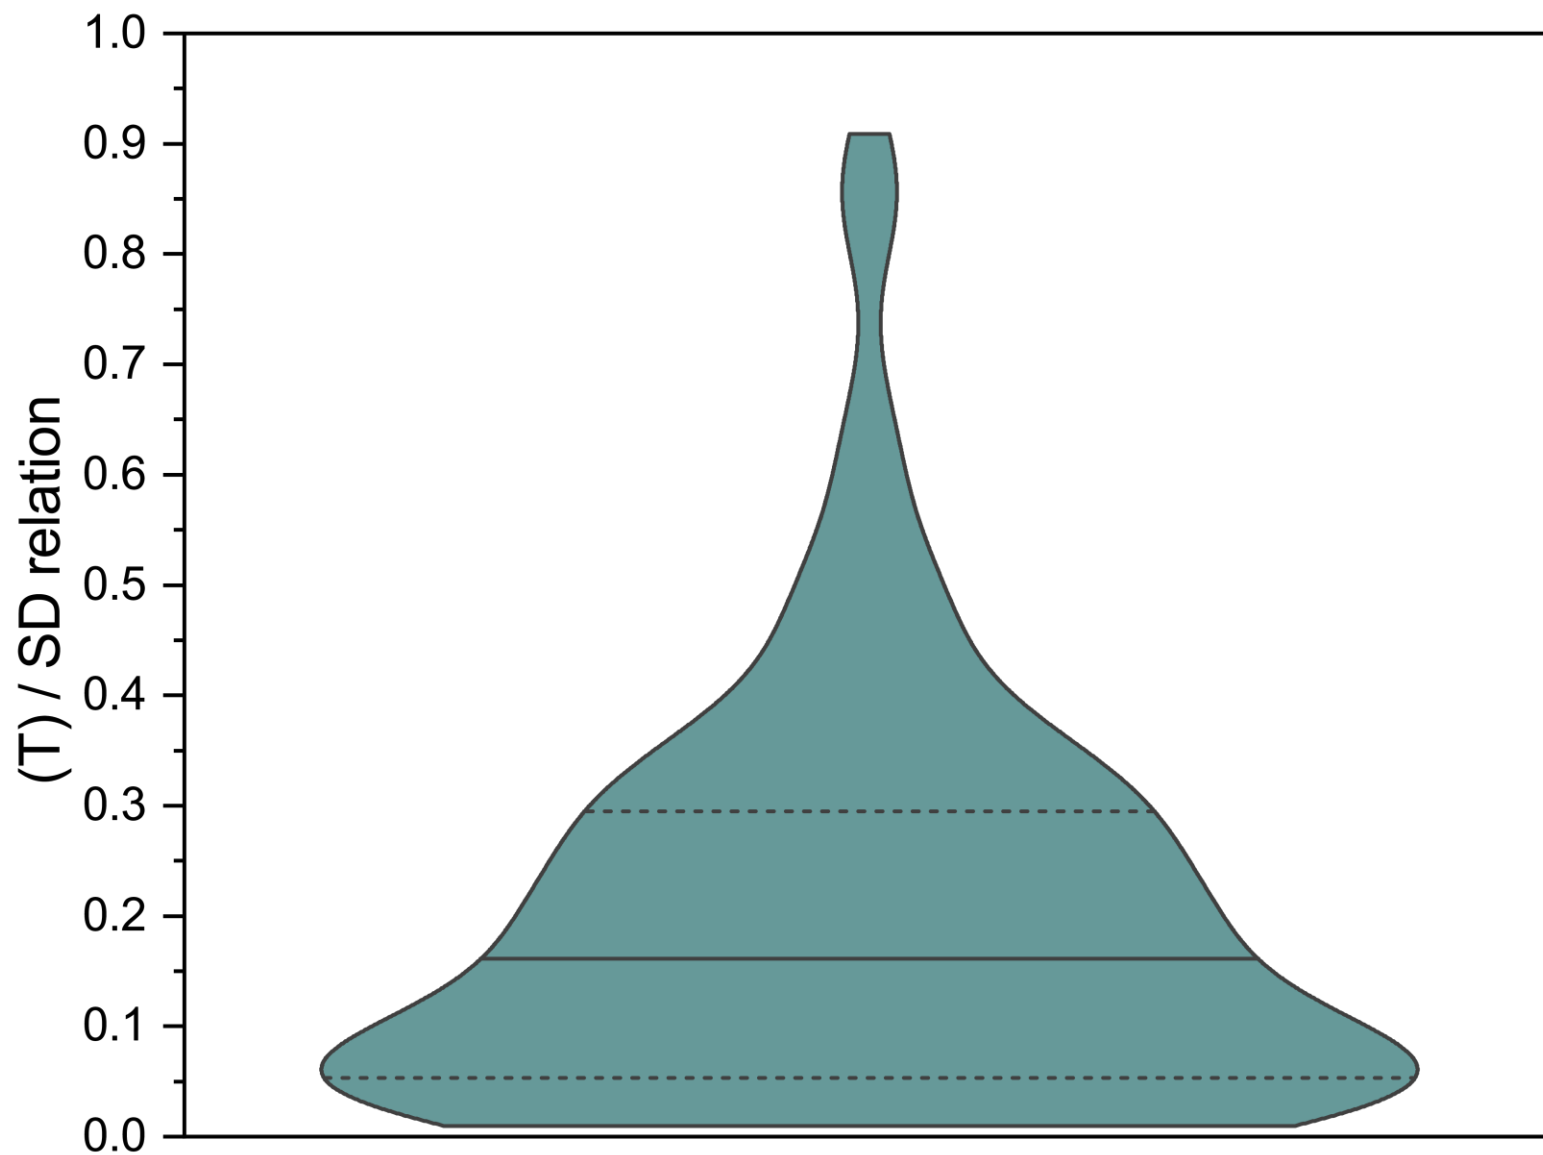

Figure S3. The relations between computational times for perturbative triples and iterative singles and doubles. The times for the FC and CV  $\text{SD}(T)/nZ$  ( $n = D, T, Q, 5$ ) computations were combined and used for visualization. Times lower than 1 min were excluded. The median (solid), 25<sup>th</sup>, and 75<sup>th</sup> percentiles (dash) are shown.

Batch #2

Table S3. Absolute deviations of core-valence corrections to the atomization energy from reference values in kcal mol<sup>-1</sup>. Reference values (REFERENCE) are computed as the mean of SDT(Q)/eN{T,Q}Z (N = 1 – 3) values. The range of SDT(Q)/eN{T,Q}Z (N = 1 – 3) values (RANGE, RMS = 0.0114 kcal mol<sup>-1</sup>) and the absolute deviations for a given coupled-cluster method and basis set (including extrapolated results) are shown. Color encoding shows the highest (red) and the lowest (green) values. Maximum (MAX), mean (MAD), root mean square (RMS), and standard deviation (SD) are provided at the bottom of the Table.

| System   | REFERENCE | RANGE  | SD(T)/DZ | SDT/DZ | SDT(Q)/DZ | SD(T)/TZ | SDT/TZ | SDT(Q)/TZ | SD(T)/QZ | SDT/QZ | SDT(Q)/QZ | SD(T)/e1{D,T}Z | SDT/e1{D,T}Z | SDT(Q)/e1{D,T}Z | SD(T)/e1{T,Q}Z | SDT/e1{T,Q}Z | SDT(Q)/e1{T,Q}Z | SD(T)/e2{D,T}Z | SDT/e2{D,T}Z | SDT(Q)/e2{D,T}Z | SD(T)/e2{T,Q}Z | SDT/e2{T,Q}Z | SDT(Q)/e2{T,Q}Z | SD(T)/e3{D,T}Z | SDT/e3{D,T}Z | SDT(Q)/e3{D,T}Z | SD(T)/e3{T,Q}Z | SDT/e3{T,Q}Z | SDT(Q)/e3{T,Q}Z |
|----------|-----------|--------|----------|--------|-----------|----------|--------|-----------|----------|--------|-----------|----------------|--------------|-----------------|----------------|--------------|-----------------|----------------|--------------|-----------------|----------------|--------------|-----------------|----------------|--------------|-----------------|----------------|--------------|-----------------|
| alh      | -0.0735   | 0.0046 | 0.1838   | 0.1709 | 0.1756    | 0.0602   | 0.0326 | 0.0446    | 0.0353   | 0.0055 | 0.0198    | 0.0081         | 0.0257       | 0.0105          | 0.0172         | 0.0142       | 0.0016          | 0.0121         | 0.0470       | 0.0318          | 0.0176         | 0.0143       | 0.0013          | 0.0147         | 0.0512       | 0.0347          | 0.0126         | 0.0192       | 0.0029          |
| bf       | 0.8417    | 0.0197 | 0.4268   | 0.4193 | 0.4140    | 0.2051   | 0.1886 | 0.1797    | 0.1076   | 0.0883 | 0.0792    | 0.1117         | 0.0915       | 0.0811          | 0.0365         | 0.0151       | 0.0058          | 0.0755         | 0.0546       | 0.0442          | 0.0383         | 0.0162       | 0.0069          | 0.0708         | 0.0489       | 0.0378          | 0.0185         | 0.0034       | 0.0127          |
| bh       | 0.2320    | 0.0037 | 0.1399   | 0.1352 | 0.1365    | 0.0470   | 0.0340 | 0.0361    | 0.0283   | 0.0137 | 0.0160    | 0.0079         | 0.0086       | 0.0061          | 0.0146         | 0.0011       | 0.0013          | 0.0073         | 0.0244       | 0.0219          | 0.0150         | 0.0011       | 0.0012          | 0.0093         | 0.0273       | 0.0247          | 0.0112         | 0.0048       | 0.0025          |
| bh3      | 1.1740    | 0.0202 | 0.6955   | 0.6943 | 0.6990    | 0.1789   | 0.1758 | 0.1825    | 0.0777   | 0.0730 | 0.0804    | 0.0386         | 0.0425       | 0.0350          | 0.0038         | 0.0020       | 0.0058          | 0.1229         | 0.1270       | 0.1195          | 0.0056         | 0.0006       | 0.0072          | 0.1340         | 0.1382       | 0.1304          | 0.0148         | 0.0210       | 0.0130          |
| ch2-sing | 0.5089    | 0.0065 | 0.1770   | 0.1633 | 0.1626    | 0.0964   | 0.0631 | 0.0628    | 0.0654   | 0.0283 | 0.0278    | 0.0625         | 0.0209       | 0.0207          | 0.0427         | 0.0030       | 0.0022          | 0.0494         | 0.0062       | 0.0061          | 0.0433         | 0.0027       | 0.0020          | 0.0477         | 0.0024       | 0.0023          | 0.0370         | 0.0034       | 0.0042          |
| co       | 1.2045    | 0.0224 | 0.5629   | 0.5594 | 0.5453    | 0.2525   | 0.2252 | 0.2080    | 0.1420   | 0.1098 | 0.0917    | 0.1218         | 0.0846       | 0.0660          | 0.0615         | 0.0255       | 0.0068          | 0.0711         | 0.0321       | 0.0135          | 0.0634         | 0.0263       | 0.0078          | 0.0644         | 0.0229       | 0.0038          | 0.0411         | 0.0042       | 0.0146          |
| f2       | 0.0599    | 0.0026 | 0.0501   | 0.0566 | 0.0661    | 0.0318   | 0.0037 | 0.0105    | 0.0440   | 0.0027 | 0.0043    | 0.0664         | 0.0185       | 0.0130          | 0.0529         | 0.0075       | 0.0001          | 0.0798         | 0.0297       | 0.0241          | 0.0526         | 0.0059       | 0.0014          | 0.0815         | 0.0283       | 0.0233          | 0.0551         | 0.0087       | 0.0012          |
| h2o      | 0.4947    | 0.0054 | 0.0840   | 0.0844 | 0.0808    | 0.0593   | 0.0538 | 0.0490    | 0.0338   | 0.0273 | 0.0216    | 0.0490         | 0.0410       | 0.0356          | 0.0152         | 0.0079       | 0.0016          | 0.0450         | 0.0365       | 0.0311          | 0.0156         | 0.0082       | 0.0019          | 0.0444         | 0.0353       | 0.0298          | 0.0105         | 0.0030       | 0.0035          |
| h2s      | 0.4461    | 0.0036 | 0.1797   | 0.1916 | 0.1907    | 0.0216   | 0.0239 | 0.0232    | 0.0055   | 0.0112 | 0.0100    | 0.1064         | 0.1146       | 0.1132          | 0.0062         | 0.0020       | 0.0004          | 0.1393         | 0.1486       | 0.1472          | 0.0059         | 0.0031       | 0.0016          | 0.1436         | 0.1544       | 0.1527          | 0.0092         | 0.0003       | 0.0020          |
| hcl      | 0.2626    | 0.0008 | 0.0806   | 0.0907 | 0.0881    | 0.0058   | 0.0009 | 0.0036    | 0.0012   | 0.0037 | 0.0015    | 0.0422         | 0.0369       | 0.0422          | 0.0021         | 0.0057       | 0.0000          | 0.0563         | 0.0513       | 0.0566          | 0.0020         | 0.0052       | 0.0004          | 0.0582         | 0.0535       | 0.0592          | 0.0030         | 0.0062       | 0.0004          |
| hf       | 0.2374    | 0.0024 | 0.0381   | 0.0390 | 0.0365    | 0.0226   | 0.0235 | 0.0189    | 0.0124   | 0.0139 | 0.0083    | 0.0160         | 0.0170       | 0.0115          | 0.0049         | 0.0069       | 0.0005          | 0.0135         | 0.0145       | 0.0089          | 0.0051         | 0.0072       | 0.0010          | 0.0132         | 0.0141       | 0.0082          | 0.0030         | 0.0051       | 0.0015          |
| n2       | 1.1569    | 0.0191 | 0.4817   | 0.4775 | 0.4623    | 0.2428   | 0.1979 | 0.1854    | 0.1479   | 0.0945 | 0.0820    | 0.1423         | 0.0802       | 0.0689          | 0.0787         | 0.0191       | 0.0064          | 0.1033         | 0.0380       | 0.0268          | 0.0804         | 0.0189       | 0.0062          | 0.0982         | 0.0285       | 0.0178          | 0.0611         | 0.0000       | 0.0127          |
| nh3      | 0.8124    | 0.0093 | 0.1696   | 0.1681 | 0.1652    | 0.1050   | 0.0899 | 0.0884    | 0.0591   | 0.0408 | 0.0390    | 0.0778         | 0.0569       | 0.0560          | 0.0256         | 0.0050       | 0.0030          | 0.0673         | 0.0453       | 0.0445          | 0.0264         | 0.0051       | 0.0031          | 0.0659         | 0.0424       | 0.0419          | 0.0171         | 0.0040       | 0.0061          |
| cf       | 0.4550    | 0.0054 | 0.1053   | 0.1023 | 0.0942    | 0.0780   | 0.0644 | 0.0512    | 0.0526   | 0.0368 | 0.0226    | 0.0665         | 0.0485       | 0.0331          | 0.0340         | 0.0167       | 0.0017          | 0.0621         | 0.0432       | 0.0278          | 0.0344         | 0.0166       | 0.0018          | 0.0615         | 0.0415       | 0.0251          | 0.0293         | 0.0116       | 0.0035          |
| ch       | 0.2006    | 0.0023 | 0.0517   | 0.0481 | 0.0482    | 0.0339   | 0.0222 | 0.0227    | 0.0229   | 0.0097 | 0.0100    | 0.0264         | 0.0113       | 0.0119          | 0.0149         | 0.0007       | 0.0008          | 0.0235         | 0.0078       | 0.0084          | 0.0151         | 0.0005       | 0.0007          | 0.0231         | 0.0065       | 0.0072          | 0.0129         | 0.0016       | 0.0015          |
| ch3      | 1.1435    | 0.0159 | 0.4484   | 0.4472 | 0.4483    | 0.1483   | 0.1411 | 0.1447    | 0.0686   | 0.0597 | 0.0638    | 0.0219         | 0.0123       | 0.0169          | 0.0104         | 0.0002       | 0.0047          | 0.0271         | 0.0372       | 0.0325          | 0.0118         | 0.0012       | 0.0056          | 0.0335         | 0.0443       | 0.0391          | 0.0043         | 0.0148       | 0.0103          |
| cn       | 1.3950    | 0.0288 | 0.6595   | 0.6382 | 0.6116    | 0.3441   | 0.2922 | 0.2650    | 0.1947   | 0.1399 | 0.1168    | 0.2113         | 0.1465       | 0.1190          | 0.0857         | 0.0288       | 0.0086          | 0.1598         | 0.0927       | 0.0652          | 0.0883         | 0.0308       | 0.0101          | 0.1530         | 0.0827       | 0.0551          | 0.0581         | 0.0007       | 0.0187          |
| hs       | 0.2242    | 0.0024 | 0.0734   | 0.0802 | 0.0811    | 0.0168   | 0.0187 | 0.0177    | 0.0053   | 0.0087 | 0.0077    | 0.0548         | 0.0604       | 0.0593          | 0.0032         | 0.0014       | 0.0004          | 0.0695         | 0.0758       | 0.0747          | 0.0030         | 0.0019       | 0.0010          | 0.0714         | 0.0787       | 0.0775          | 0.0053         | 0.0005       | 0.0014          |
| nh2      | 0.4433    | 0.0049 | 0.0602   | 0.0595 | 0.0578    | 0.0576   | 0.0475 | 0.0466    | 0.0339   | 0.0220 | 0.0206    | 0.0565         | 0.0425       | 0.0419          | 0.0165         | 0.0033       | 0.0016          | 0.0561         | 0.0413       | 0.0407          | 0.0170         | 0.0033       | 0.0016          | 0.0561         | 0.0403       | 0.0398          | 0.0121         | 0.0014       | 0.0032          |

| System   | REFERENCE | RANGE  | SD(T)/DZ | SDT/DZ | SDT(Q)/DZ | SD(T)/TZ | SDT/TZ | SDT(Q)/TZ | SD(T)/QZ | SDT/QZ | SDT(Q)/QZ | SD(T)/e1{D,T}Z | SDT/e1{D,T}Z | SDT(Q)/e1{D,T}Z | SD(T)/e1{T,Q}Z | SDT/e1{T,Q}Z | SDT(Q)/e1{T,Q}Z | SD(T)/e2{D,T}Z | SDT/e2{D,T}Z | SDT(Q)/e2{D,T}Z | SD(T)/e2{T,Q}Z | SDT/e2{T,Q}Z | SDT(Q)/e2{T,Q}Z | SD(T)/e3{D,T}Z | SDT/e3{D,T}Z | SDT(Q)/e3{D,T}Z | SD(T)/e3{T,Q}Z | SDT/e3{T,Q}Z | SDT(Q)/e3{T,Q}Z |
|----------|-----------|--------|----------|--------|-----------|----------|--------|-----------|----------|--------|-----------|----------------|--------------|-----------------|----------------|--------------|-----------------|----------------|--------------|-----------------|----------------|--------------|-----------------|----------------|--------------|-----------------|----------------|--------------|-----------------|
| no       | 0.6987    | 0.0080 | 0.1742   | 0.1709 | 0.1547    | 0.1324   | 0.0951 | 0.0782    | 0.0968   | 0.0524 | 0.0347    | 0.1148         | 0.0631       | 0.0460          | 0.0708         | 0.0213       | 0.0030          | 0.1080         | 0.0537       | 0.0366          | 0.0714         | 0.0203       | 0.0021          | 0.1071         | 0.0492       | 0.0319          | 0.0642         | 0.0134       | 0.0051          |
| oh       | 0.2108    | 0.0021 | 0.0184   | 0.0188 | 0.0171    | 0.0236   | 0.0214 | 0.0188    | 0.0140   | 0.0115 | 0.0083    | 0.0258         | 0.0225       | 0.0195          | 0.0070         | 0.0044       | 0.0006          | 0.0266         | 0.0231       | 0.0202          | 0.0072         | 0.0045       | 0.0008          | 0.0267         | 0.0229       | 0.0199          | 0.0053         | 0.0025       | 0.0014          |
| sih      | 0.0464    | 0.0006 | 0.1029   | 0.1000 | 0.1042    | 0.0158   | 0.0063 | 0.0024    | 0.0146   | 0.0093 | 0.0012    | 0.0209         | 0.0511       | 0.0404          | 0.0138         | 0.0114       | 0.0003          | 0.0351         | 0.0668       | 0.0561          | 0.0138         | 0.0118       | 0.0003          | 0.0370         | 0.0708       | 0.0592          | 0.0136         | 0.0119       | 0.0000          |
| ch2-trip | 0.8604    | 0.0130 | 0.3868   | 0.3870 | 0.3890    | 0.1152   | 0.1132 | 0.1168    | 0.0503   | 0.0475 | 0.0514    | 0.0009         | 0.0020       | 0.0022          | 0.0029         | 0.0005       | 0.0037          | 0.0435         | 0.0465       | 0.0423          | 0.0041         | 0.0005       | 0.0046          | 0.0493         | 0.0525       | 0.0480          | 0.0090         | 0.0126       | 0.0084          |
| nh       | 0.1739    | 0.0016 | 0.0001   | 0.0000 | 0.0006    | 0.0206   | 0.0159 | 0.0155    | 0.0131   | 0.0076 | 0.0069    | 0.0293         | 0.0225       | 0.0223          | 0.0077         | 0.0015       | 0.0005          | 0.0326         | 0.0255       | 0.0253          | 0.0078         | 0.0015       | 0.0005          | 0.0331         | 0.0255       | 0.0253          | 0.0063         | 0.0000       | 0.0011          |
| o2       | 0.4223    | 0.0025 | 0.0562   | 0.0551 | 0.0432    | 0.0666   | 0.0334 | 0.0252    | 0.0599   | 0.0195 | 0.0114    | 0.0709         | 0.0243       | 0.0177          | 0.0550         | 0.0093       | 0.0014          | 0.0726         | 0.0235       | 0.0169          | 0.0551         | 0.0077       | 0.0002          | 0.0728         | 0.0203       | 0.0143          | 0.0538         | 0.0067       | 0.0012          |
|          |           | MAX    | 0.6955   | 0.6943 | 0.6990    | 0.3441   | 0.2922 | 0.2650    | 0.1947   | 0.1399 | 0.1168    | 0.2113         | 0.1465       | 0.1190          | 0.0857         | 0.0288       | 0.0086          | 0.1598         | 0.1486       | 0.1472          | 0.0883         | 0.0308       | 0.0101          | 0.1530         | 0.1544       | 0.1527          | 0.0642         | 0.0210       | 0.0187          |
|          |           | MAD    | 0.2163   | 0.2143 | 0.2109    | 0.0953   | 0.0794 | 0.0759    | 0.0555   | 0.0375 | 0.0335    | 0.0620         | 0.0458       | 0.0396          | 0.0274         | 0.0086       | 0.0025          | 0.0624         | 0.0477       | 0.0409          | 0.0280         | 0.0086       | 0.0029          | 0.0628         | 0.0473       | 0.0403          | 0.0227         | 0.0065       | 0.0053          |
|          |           | RMS    | 0.2987   | 0.2953 | 0.2909    | 0.1290   | 0.1115 | 0.1057    | 0.0737   | 0.0524 | 0.0466    | 0.0790         | 0.0575       | 0.0501          | 0.0373         | 0.0118       | 0.0035          | 0.0736         | 0.0580       | 0.0522          | 0.0381         | 0.0120       | 0.0040          | 0.0737         | 0.0590       | 0.0535          | 0.0304         | 0.0088       | 0.0074          |
|          |           | SD     | 0.2103   | 0.2074 | 0.2044    | 0.0888   | 0.0800 | 0.0751    | 0.0496   | 0.0374 | 0.0331    | 0.0499         | 0.0355       | 0.0313          | 0.0259         | 0.0083       | 0.0025          | 0.0398         | 0.0338       | 0.0331          | 0.0263         | 0.0086       | 0.0028          | 0.0394         | 0.0360       | 0.0358          | 0.0206         | 0.0061       | 0.0053          |



Table S4. Differences between absolute deviations obtained at given levels of theory in kcal mol<sup>-1</sup>. Reference values are computed as the mean of SDT(Q)/eN{T,Q}Z (N = 1 – 3) values. Positive values are highlighted in red. Maximum (MAX), mean (MAD), root mean square (RMS), and standard deviation (SD) are provided at the bottom of the Table.

| System   | $\frac{\text{SDT/DZ}}{\text{SD(T)/TZ}}$ | $\frac{\text{SDT(Q)/DZ}}{\text{SD(T)/TZ}}$ | $\frac{\text{SDT/TZ}}{\text{SD(T)/QZ}}$ | $\frac{\text{SDT(Q)/TZ}}{\text{SD(T)/QZ}}$ | $\frac{\text{SDT/e1{D,T}Z}}{\text{SD(T)/e1{T,Q}Z}}$ | $\frac{\text{SDT(Q)/e1{D,T}Z}}{\text{SD(T)/e1{T,Q}Z}}$ | $\frac{\text{SDT/e2{D,T}Z}}{\text{SD(T)/e2{T,Q}Z}}$ | $\frac{\text{SDT(Q)/e2{D,T}Z}}{\text{SD(T)/e2{T,Q}Z}}$ | $\frac{\text{SDT/e3{D,T}Z}}{\text{SD(T)/e3{T,Q}Z}}$ | $\frac{\text{SDT(Q)/e3{D,T}Z}}{\text{SD(T)/e3{T,Q}Z}}$ |
|----------|-----------------------------------------|--------------------------------------------|-----------------------------------------|--------------------------------------------|-----------------------------------------------------|--------------------------------------------------------|-----------------------------------------------------|--------------------------------------------------------|-----------------------------------------------------|--------------------------------------------------------|
| alh      | 0.1107                                  | 0.1430                                     | -0.0028                                 | 0.0391                                     | 0.0085                                              | -0.0037                                                | 0.0293                                              | 0.0175                                                 | 0.0386                                              | 0.0155                                                 |
| bf       | 0.2142                                  | 0.2253                                     | 0.0810                                  | 0.0914                                     | 0.0550                                              | 0.0660                                                 | 0.0164                                              | 0.0280                                                 | 0.0304                                              | 0.0344                                                 |
| bh       | 0.0882                                  | 0.1025                                     | 0.0058                                  | 0.0224                                     | -0.0061                                             | 0.0050                                                 | 0.0094                                              | 0.0208                                                 | 0.0161                                              | 0.0198                                                 |
| bh3      | 0.5154                                  | 0.5232                                     | 0.0981                                  | 0.1095                                     | 0.0387                                              | 0.0330                                                 | 0.1213                                              | 0.1189                                                 | 0.1234                                              | 0.1094                                                 |
| ch2-sing | 0.0668                                  | 0.0995                                     | -0.0023                                 | 0.0344                                     | -0.0219                                             | 0.0178                                                 | -0.0371                                             | 0.0034                                                 | -0.0347                                             | -0.0011                                                |
| co       | 0.3069                                  | 0.3200                                     | 0.0832                                  | 0.0982                                     | 0.0231                                              | 0.0405                                                 | -0.0314                                             | -0.0128                                                | -0.0182                                             | -0.0005                                                |
| f2       | 0.0247                                  | 0.0624                                     | -0.0402                                 | 0.0077                                     | -0.0344                                             | 0.0055                                                 | -0.0230                                             | 0.0182                                                 | -0.0268                                             | 0.0146                                                 |
| h2o      | 0.0250                                  | 0.0269                                     | 0.0200                                  | 0.0217                                     | 0.0258                                              | 0.0277                                                 | 0.0208                                              | 0.0230                                                 | 0.0248                                              | 0.0267                                                 |
| h2s      | 0.1700                                  | 0.1668                                     | 0.0184                                  | 0.0119                                     | 0.1084                                              | 0.1112                                                 | 0.1426                                              | 0.1441                                                 | 0.1452                                              | 0.1524                                                 |
| hcl      | 0.0849                                  | 0.0872                                     | -0.0003                                 | 0.0000                                     | 0.0348                                              | 0.0366                                                 | 0.0493                                              | 0.0514                                                 | 0.0506                                              | 0.0530                                                 |
| hf       | 0.0164                                  | 0.0130                                     | 0.0112                                  | 0.0050                                     | 0.0121                                              | 0.0045                                                 | 0.0094                                              | 0.0017                                                 | 0.0111                                              | 0.0031                                                 |
| n2       | 0.2346                                  | 0.2644                                     | 0.0500                                  | 0.0909                                     | 0.0015                                              | 0.0498                                                 | -0.0423                                             | 0.0079                                                 | -0.0326                                             | 0.0177                                                 |
| nh3      | 0.0631                                  | 0.0753                                     | 0.0308                                  | 0.0476                                     | 0.0313                                              | 0.0510                                                 | 0.0189                                              | 0.0393                                                 | 0.0254                                              | 0.0378                                                 |
| cf       | 0.0243                                  | 0.0298                                     | 0.0118                                  | 0.0144                                     | 0.0145                                              | 0.0164                                                 | 0.0087                                              | 0.0112                                                 | 0.0122                                              | 0.0135                                                 |
| ch       | 0.0142                                  | 0.0260                                     | -0.0008                                 | 0.0130                                     | -0.0037                                             | 0.0113                                                 | -0.0074                                             | 0.0079                                                 | -0.0064                                             | 0.0056                                                 |
| ch3      | 0.2989                                  | 0.3072                                     | 0.0726                                  | 0.0851                                     | 0.0018                                              | 0.0167                                                 | 0.0254                                              | 0.0313                                                 | 0.0400                                              | 0.0243                                                 |
| cn       | 0.2941                                  | 0.3194                                     | 0.0975                                  | 0.1251                                     | 0.0609                                              | 0.0903                                                 | 0.0044                                              | 0.0344                                                 | 0.0246                                              | 0.0544                                                 |
| hs       | 0.0634                                  | 0.0623                                     | 0.0135                                  | 0.0090                                     | 0.0572                                              | 0.0579                                                 | 0.0728                                              | 0.0728                                                 | 0.0734                                              | 0.0770                                                 |
| nh2      | 0.0019                                  | 0.0103                                     | 0.0137                                  | 0.0246                                     | 0.0260                                              | 0.0385                                                 | 0.0244                                              | 0.0374                                                 | 0.0281                                              | 0.0384                                                 |
| no       | 0.0385                                  | 0.0596                                     | -0.0017                                 | 0.0258                                     | -0.0076                                             | 0.0247                                                 | -0.0177                                             | 0.0163                                                 | -0.0150                                             | 0.0185                                                 |
| oh       | -0.0048                                 | -0.0042                                    | 0.0073                                  | 0.0073                                     | 0.0154                                              | 0.0152                                                 | 0.0159                                              | 0.0157                                                 | 0.0177                                              | 0.0173                                                 |
| sih      | 0.0842                                  | 0.0978                                     | -0.0083                                 | -0.0068                                    | 0.0373                                              | 0.0290                                                 | 0.0530                                              | 0.0443                                                 | 0.0572                                              | 0.0472                                                 |

| System          | $\frac{SDT/DZ}{-SD(T)/TZ}$ | $\frac{SDT(Q)/DZ}{-SDT/TZ}$ | $\frac{SDT/TZ}{-SD(T)/QZ}$ | $\frac{SDT(Q)/TZ}{-SDT/QZ}$ | $\frac{SDT/e1\{D,T\}Z}{-SD(T)/e1\{T,Q\}Z}$ | $\frac{SDT(Q)/e1\{D,T\}Z}{-SDT/e1\{T,Q\}Z}$ | $\frac{SDT/e2\{D,T\}Z}{-SD(T)/e2\{T,Q\}Z}$ | $\frac{SDT(Q)/e2\{D,T\}Z}{-SDT/e2\{T,Q\}Z}$ | $\frac{SDT/e3\{D,T\}Z}{-SD(T)/e3\{T,Q\}Z}$ | $\frac{SDT(Q)/e3\{D,T\}Z}{-SDT/e3\{T,Q\}Z}$ |
|-----------------|----------------------------|-----------------------------|----------------------------|-----------------------------|--------------------------------------------|---------------------------------------------|--------------------------------------------|---------------------------------------------|--------------------------------------------|---------------------------------------------|
| <b>ch2-trip</b> | 0.2718                     | 0.2757                      | 0.0630                     | 0.0693                      | -0.0009                                    | 0.0018                                      | 0.0424                                     | 0.0418                                      | 0.0435                                     | 0.0354                                      |
| <b>nh</b>       | -0.0206                    | -0.0153                     | 0.0027                     | 0.0079                      | 0.0149                                     | 0.0208                                      | 0.0177                                     | 0.0238                                      | 0.0192                                     | 0.0252                                      |
| <b>o2</b>       | -0.0114                    | 0.0098                      | -0.0265                    | 0.0058                      | -0.0308                                    | 0.0084                                      | -0.0317                                    | 0.0092                                      | -0.0335                                    | 0.0076                                      |
| <b>MAX</b>      | 0.3502                     | 0.4068                      | 0.0975                     | 0.1251                      | 0.0609                                     | 0.0903                                      | 0.0602                                     | 0.1164                                      | 0.0902                                     | 0.1317                                      |
| <b>MAD</b>      | 0.1190                     | 0.1315                      | 0.0239                     | 0.0384                      | 0.0185                                     | 0.0310                                      | 0.0197                                     | 0.0323                                      | 0.0246                                     | 0.0339                                      |
| <b>RMS</b>      | 0.1663                     | 0.1793                      | 0.0378                     | 0.0533                      | 0.0202                                     | 0.0382                                      | 0.0199                                     | 0.0402                                      | 0.0286                                     | 0.0447                                      |
| <b>SD</b>       | 0.1186                     | 0.1245                      | 0.0304                     | 0.0377                      | 0.0096                                     | 0.0230                                      | 0.0074                                     | 0.0245                                      | 0.0154                                     | 0.0298                                      |

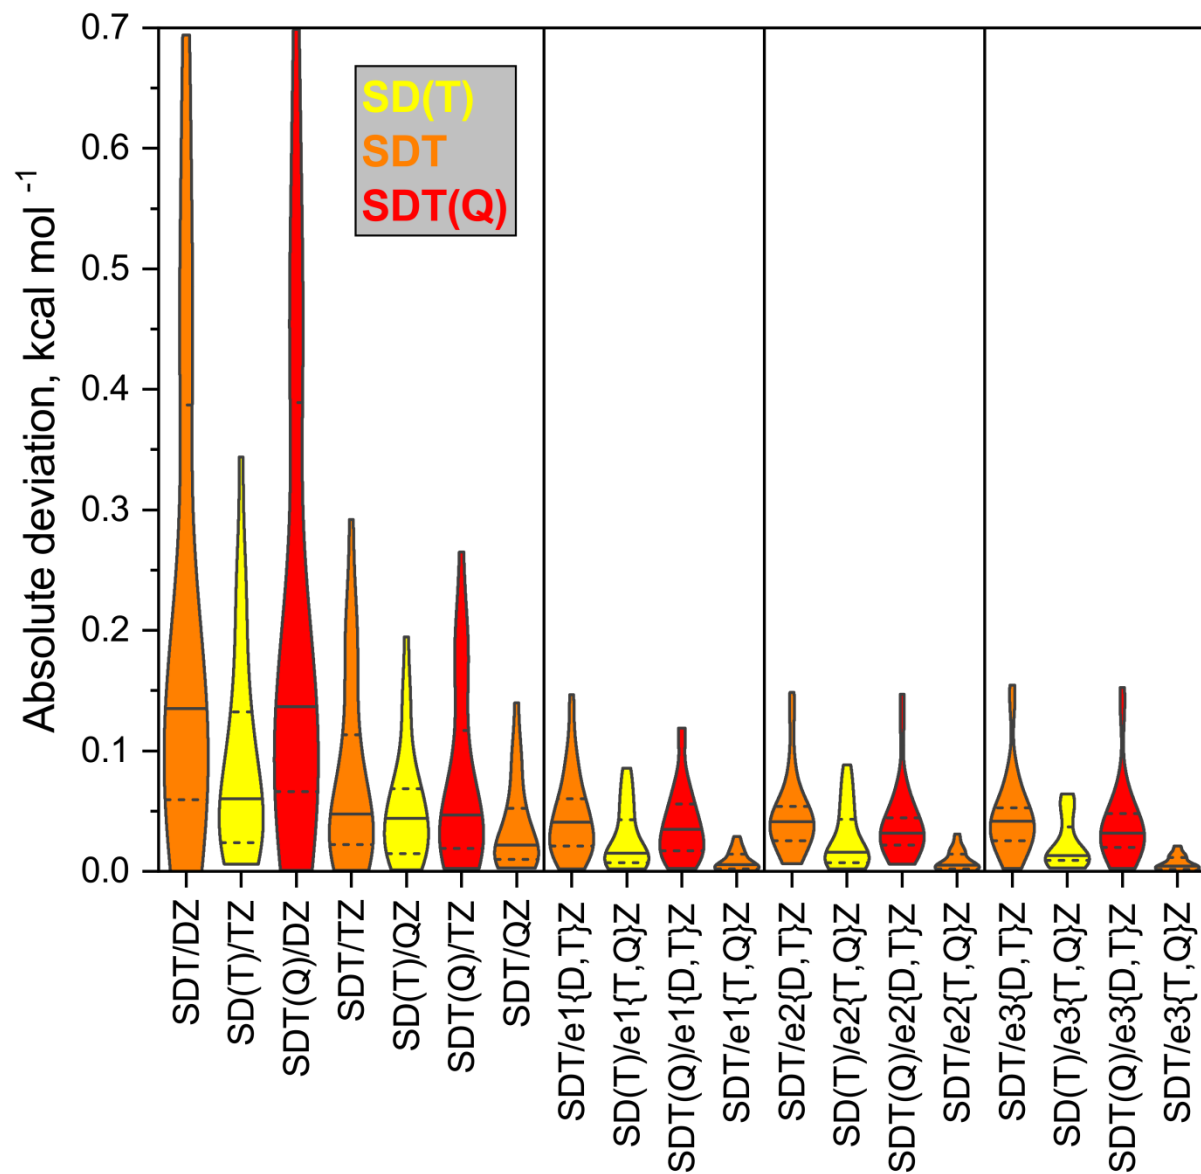

Figure S4. Violin plots of the absolute deviations obtained at a given level of theory. Reference values are computed as the mean of  $\text{SDT(Q)}/eN\{\text{T,Q}\}Z$  ( $N = 1 - 3$ ) values. The median (solid), 25<sup>th</sup>, and 75<sup>th</sup> percentiles (dash) are shown. The highest point of a plot represents the maximum deviation.

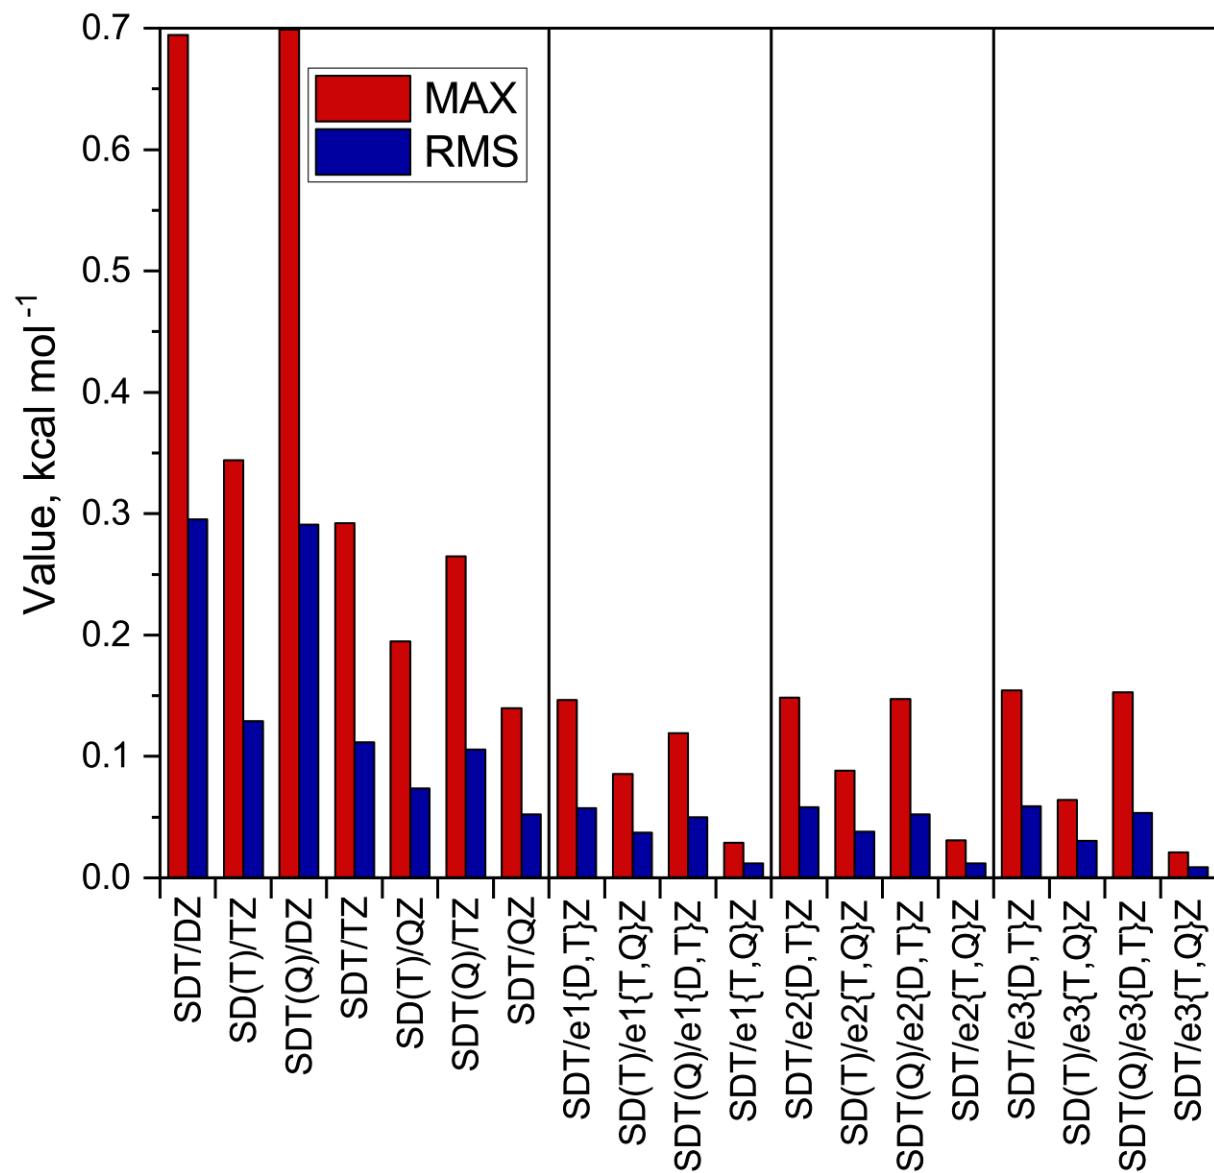

Figure S5. Maximum (MAX) and root mean square (RMS) values for the absolute deviations obtained at a given level of theory. Reference values are computed as the mean of  $\text{SDT(Q)/eN}\{T,Q\}Z$  ( $N = 1 - 3$ ) values.

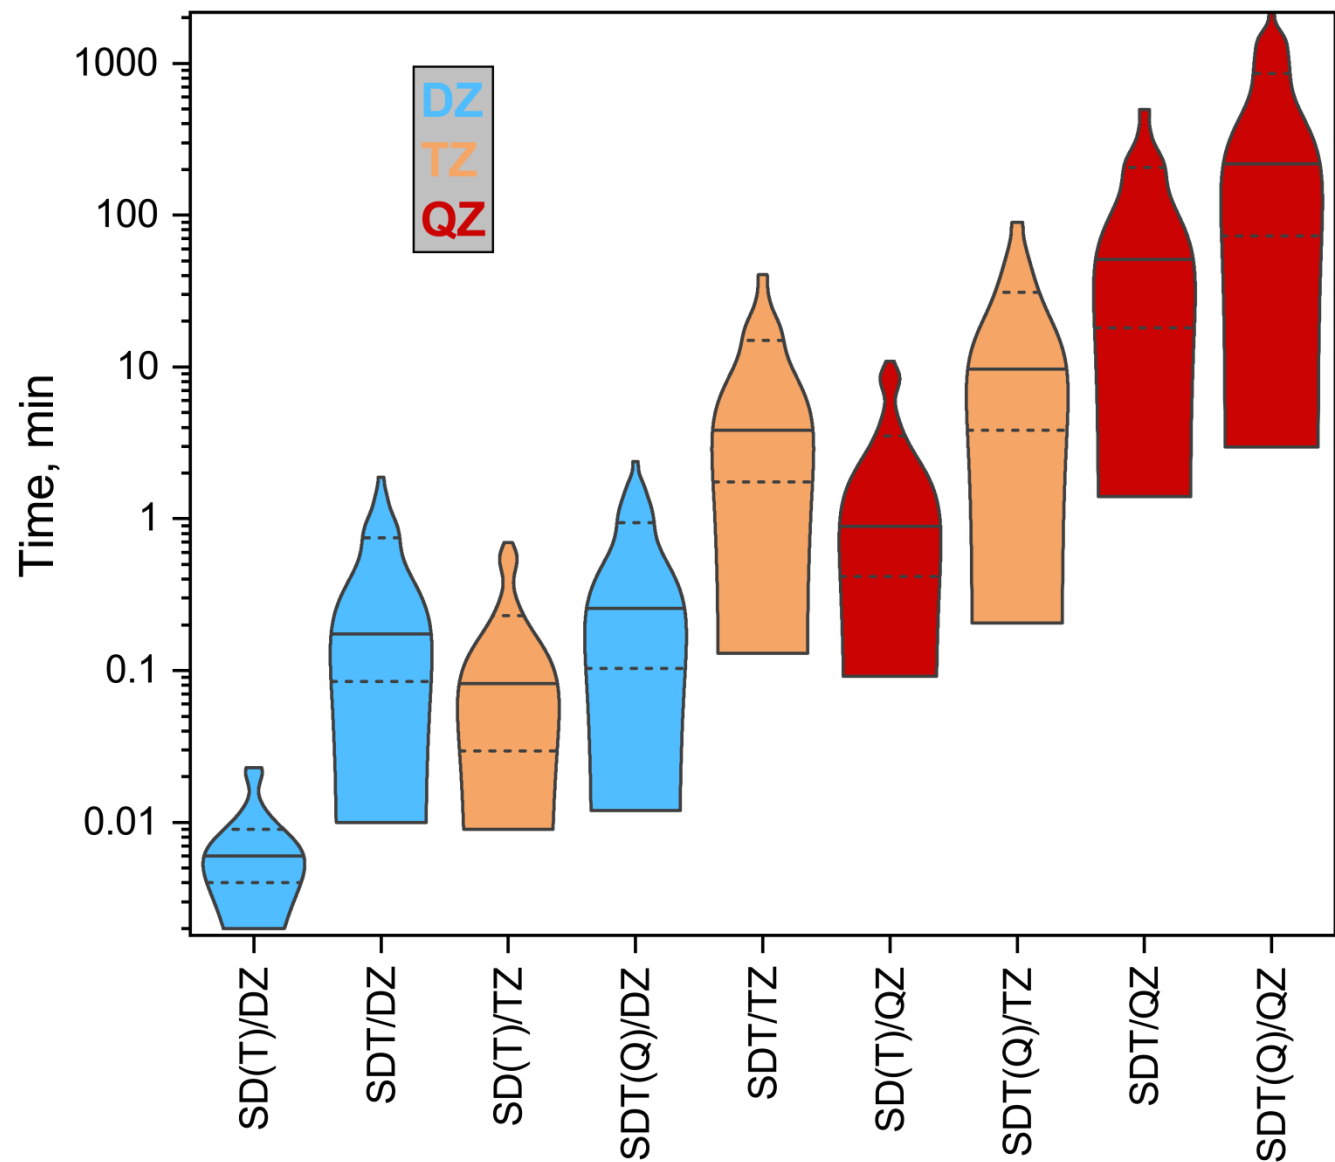

Figure S6. Computational times for different levels of theory. The times for the FC and CV calculations were combined and used for the visualization. The data for the SD(T) method were obtained using the optimized CCSD(T) program “ccsd” for systems for which SDT(Q) computations were performed. The median (solid), 25<sup>th</sup>, and 75<sup>th</sup> percentiles (dash) are shown.

Batches #3 and #4

Table S5. Absolute deviations of core-valence corrections to the atomization energy from reference values in kcal mol<sup>-1</sup>. Reference values (REFERENCE) are computed as the mean of SDTQ(P)/eN{D,T}Z (N = 1 – 3) values. The range of SDTQ(P)/eN{D,T}Z (N = 1 – 3) values (RANGE, RMS = 0.0389 kcal mol<sup>-1</sup>) and the absolute deviations for a given coupled-cluster method and basis set (including extrapolated results) are shown. Color encoding shows the highest (red) and the lowest (green) values. Maximum (MAX), mean (MAD), root mean square (RMS), and standard deviation (SD) are provided at the bottom of the Table.

| System   | REFERENCE | RANGE      | SDT(Q)/DZ | SDTQ/DZ | SDTQ(P)/DZ | SDT(Q)/TZ | SDTQ/TZ | SDTQ(P)/TZ | SDT(Q)/e1{D,T}Z | SDTQ/e1{D,T}Z | SDTQ(P)/e1{D,T}Z | SDT(Q)/e2{D,T}Z | SDTQ/e2{D,T}Z | SDTQ(P)/e2{D,T}Z | SDT(Q)/e3{D,T}Z | SDTQ/e3{D,T}Z | SDTQ(P)/e3{D,T}Z |
|----------|-----------|------------|-----------|---------|------------|-----------|---------|------------|-----------------|---------------|------------------|-----------------|---------------|------------------|-----------------|---------------|------------------|
| bh3      | 1.26786   | 0.09526    | 0.79286   | 0.79310 | 0.79316    | 0.27634   | 0.27679 | 0.27718    | 0.05886         | 0.05940       | 0.05992          | 0.02563         | 0.02497       | 0.02459          | 0.03650         | 0.03593       | 0.03534          |
| ch2–sing | 0.49873   | 0.01836    | 0.15241   | 0.15241 | 0.15238    | 0.05261   | 0.05258 | 0.05294    | 0.01058         | 0.01054       | 0.01107          | 0.00407         | 0.00413       | 0.00377          | 0.00784         | 0.00789       | 0.00729          |
| h2o      | 0.46196   | 0.00582    | 0.04805   | 0.04841 | 0.04812    | 0.01629   | 0.01711 | 0.01659    | 0.00292         | 0.00394       | 0.00331          | 0.00155         | 0.00027       | 0.00080          | 0.00294         | 0.00184       | 0.00251          |
| hf       | 0.22761   | 0.00325    | 0.02671   | 0.02702 | 0.02687    | 0.00908   | 0.00961 | 0.00927    | 0.00166         | 0.00228       | 0.00186          | 0.00088         | 0.00013       | 0.00047          | 0.00160         | 0.00093       | 0.00139          |
| ch       | 0.19136   | 0.00468    | 0.03899   | 0.03882 | 0.03880    | 0.01345   | 0.01327 | 0.01344    | 0.00270         | 0.00251       | 0.00276          | 0.00083         | 0.00102       | 0.00084          | 0.00202         | 0.00221       | 0.00192          |
| ch3      | 1.16100   | 0.05596    | 0.46589   | 0.46591 | 0.46585    | 0.16229   | 0.16254 | 0.16275    | 0.03446         | 0.03481       | 0.03514          | 0.01500         | 0.01452       | 0.01431          | 0.02159         | 0.02120       | 0.02082          |
| nh2      | 0.40206   | 0.00201    | 0.01660   | 0.01664 | 0.01646    | 0.00539   | 0.00571 | 0.00559    | 0.00067         | 0.00110       | 0.00101          | 0.00047         | 0.00012       | 0.00000          | 0.00140         | 0.00091       | 0.00100          |
| oh       | 0.19082   | 0.00077    | 0.00286   | 0.00273 | 0.00286    | 0.00117   | 0.00089 | 0.00110    | 0.00046         | 0.00012       | 0.00036          | 0.00019         | 0.00062       | 0.00040          | 0.00015         | 0.00022       | 0.00004          |
| ch2–trip | 0.88953   | 0.05021    | 0.41814   | 0.41809 | 0.41807    | 0.14599   | 0.14599 | 0.14610    | 0.03140         | 0.03142       | 0.03158          | 0.01311         | 0.01307       | 0.01295          | 0.01885         | 0.01882       | 0.01863          |
| nh       | 0.14952   | 0.00304    | 0.02496   | 0.02500 | 0.02508    | 0.00885   | 0.00879 | 0.00885    | 0.00207         | 0.00197       | 0.00201          | 0.00092         | 0.00108       | 0.00103          | 0.00091         | 0.00103       | 0.00099          |
|          |           | <b>MAX</b> | 0.79286   | 0.79310 | 0.79316    | 0.27634   | 0.27679 | 0.27718    | 0.05886         | 0.05940       | 0.05992          | 0.02563         | 0.02497       | 0.02459          | 0.03650         | 0.03593       | 0.03534          |
|          |           | <b>MAD</b> | 0.19875   | 0.19881 | 0.19877    | 0.06915   | 0.06933 | 0.06938    | 0.01458         | 0.01481       | 0.01490          | 0.00627         | 0.00599       | 0.00592          | 0.00938         | 0.00910       | 0.00899          |
|          |           | <b>RMS</b> | 0.32391   | 0.32398 | 0.32397    | 0.11288   | 0.11304 | 0.11319    | 0.02403         | 0.02423       | 0.02444          | 0.01037         | 0.01012       | 0.00997          | 0.01495         | 0.01472       | 0.01448          |
|          |           | <b>SD</b>  | 0.26961   | 0.26964 | 0.26967    | 0.09405   | 0.09411 | 0.09427    | 0.02013         | 0.02021       | 0.02042          | 0.00871         | 0.00860       | 0.00846          | 0.01226         | 0.01220       | 0.01196          |

Table S6. Differences between absolute deviations obtained at given levels of theory in kcal mol<sup>-1</sup>. Reference values are computed as the mean of SDTQ(P)/eN{D,T}Z (N = 1 – 3) values. Positive values are highlighted in red. Maximum (MAX), mean (MAD), root mean square (RMS), and standard deviation (SD) are provided at the bottom of the Table.

| <b>System</b>   | <b>SDTQ/DZ<br/>–<br/>SDT(Q)/TZ</b> | <b>SDTQ(P)/DZ<br/>–<br/>SDTQ/TZ</b> |
|-----------------|------------------------------------|-------------------------------------|
| <b>bh3</b>      | 0.51676                            | 0.51637                             |
| <b>ch2–sing</b> | 0.09981                            | 0.09980                             |
| <b>h2o</b>      | 0.03212                            | 0.03101                             |
| <b>hf</b>       | 0.01794                            | 0.01725                             |
| <b>ch</b>       | 0.02537                            | 0.02554                             |
| <b>ch3</b>      | 0.30362                            | 0.30331                             |
| <b>nh2</b>      | 0.01125                            | 0.01076                             |
| <b>oh</b>       | 0.00156                            | 0.00197                             |
| <b>ch2–trip</b> | 0.27210                            | 0.27208                             |
| <b>nh</b>       | 0.01615                            | 0.01629                             |
| <b>MAX</b>      | 0.51676                            | 0.51637                             |
| <b>MAD</b>      | 0.12967                            | 0.12944                             |
| <b>RMS</b>      | 0.21109                            | 0.21093                             |
| <b>SD</b>       | 0.17559                            | 0.17555                             |

Table S7. Absolute deviations of core-valence corrections to the atomization energy from reference values in kcal mol<sup>-1</sup>. Reference values (REFERENCE) are computed as the mean of SDTQP/eN{D,T}Z (N = 1 – 3) values. The range of SDTQP/eN{D,T}Z (N = 1 – 3) values (RANGE, RMS = 0.0486 kcal mol<sup>-1</sup>) and the absolute deviations for a given coupled-cluster method and basis set (including extrapolated results) are shown. Color encoding shows the highest (red) and the lowest (green) values. Maximum (MAX), mean (MAD), root mean square (RMS), and standard deviation (SD) are provided at the bottom of the Table.

| System   | REFERENCE | RANGE   | SDTQ(P)/DZ | SDTQP/DZ | SDTQ(P)/TZ | SDTQP/TZ | SDTQ(P)/e1{D,T}Z | SDTQP/e1{D,T}Z | SDTQ(P)/e2{D,T}Z | SDTQP/e2{D,T}Z | SDTQ(P)/e3{D,T}Z | SDTQP/e3{D,T}Z |
|----------|-----------|---------|------------|----------|------------|----------|------------------|----------------|------------------|----------------|------------------|----------------|
| bh3      | 1.26812   | 0.09529 | 0.79342    | 0.79336  | 0.27744    | 0.27723  | 0.06019          | 0.05991        | 0.02432          | 0.02453        | 0.03508          | 0.03538        |
| ch2-sing | 0.49932   | 0.01842 | 0.15297    | 0.15282  | 0.05353    | 0.05305  | 0.01166          | 0.01104        | 0.00318          | 0.00366        | 0.00670          | 0.00738        |
| h2o      | 0.46202   | 0.00583 | 0.04819    | 0.04821  | 0.01665    | 0.01661  | 0.00338          | 0.00331        | 0.00073          | 0.00078        | 0.00245          | 0.00253        |
| hf       | 0.22761   | 0.00325 | 0.02686    | 0.02686  | 0.00927    | 0.00927  | 0.00186          | 0.00186        | 0.00047          | 0.00047        | 0.00139          | 0.00139        |
|          |           | MAX     | 0.79342    | 0.79336  | 0.27744    | 0.27723  | 0.06019          | 0.05991        | 0.02432          | 0.02453        | 0.03508          | 0.03538        |
|          |           | MAD     | 0.25536    | 0.25531  | 0.08922    | 0.08904  | 0.01927          | 0.01903        | 0.00718          | 0.00736        | 0.01140          | 0.01167        |
|          |           | RMS     | 0.40496    | 0.40491  | 0.14160    | 0.14145  | 0.03071          | 0.03052        | 0.01227          | 0.01241        | 0.01791          | 0.01813        |
|          |           | SD      | 0.36292    | 0.36290  | 0.12696    | 0.12691  | 0.02762          | 0.02755        | 0.01150          | 0.01154        | 0.01595          | 0.01602        |



Table S8. Differences between absolute deviations obtained at given levels of theory in kcal mol<sup>-1</sup>. Reference values are computed as the mean of SDTQP/eN{D,T}Z (N = 1 – 3) values. Positive values are highlighted in red. Maximum (MAX), mean (MAD), root mean square (RMS), and standard deviation (SD) are provided at the bottom of the Table.

| System          | $\frac{\text{SDTQP/DZ}}{\text{SDTQP/TZ}}$ |
|-----------------|-------------------------------------------|
| <b>bh3</b>      | 0.51592                                   |
| <b>ch2-sing</b> | 0.09929                                   |
| <b>h2o</b>      | 0.03155                                   |
| <b>hf</b>       | 0.01759                                   |
| <b>MAX</b>      | 0.51592                                   |
| <b>MAD</b>      | 0.16609                                   |
| <b>RMS</b>      | 0.26331                                   |
| <b>SD</b>       | 0.23593                                   |

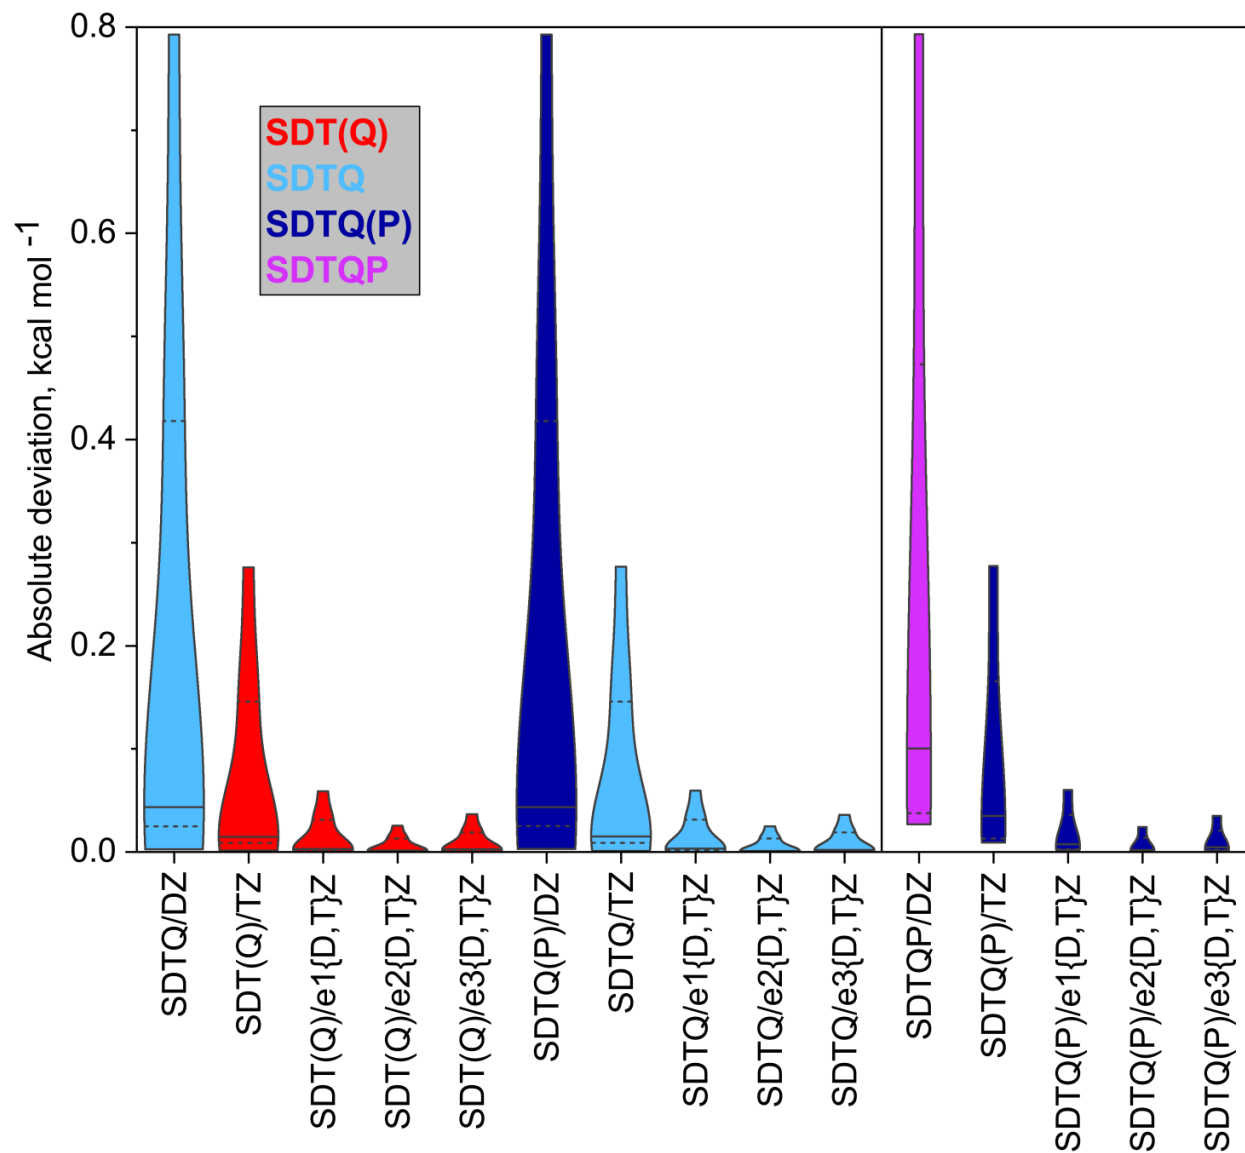

Figure S7. Violin plots of the absolute deviations obtained at a given level of theory. Reference values are computed as the mean of SDTQ(P) (left panel) or SDTQP (right panel)  $eN\{D,T\}Z$  ( $N = 1 - 3$ ) values. The median (solid), 25<sup>th</sup>, and 75<sup>th</sup> percentiles (dash) are shown. The highest point of a plot represents the maximum deviation.

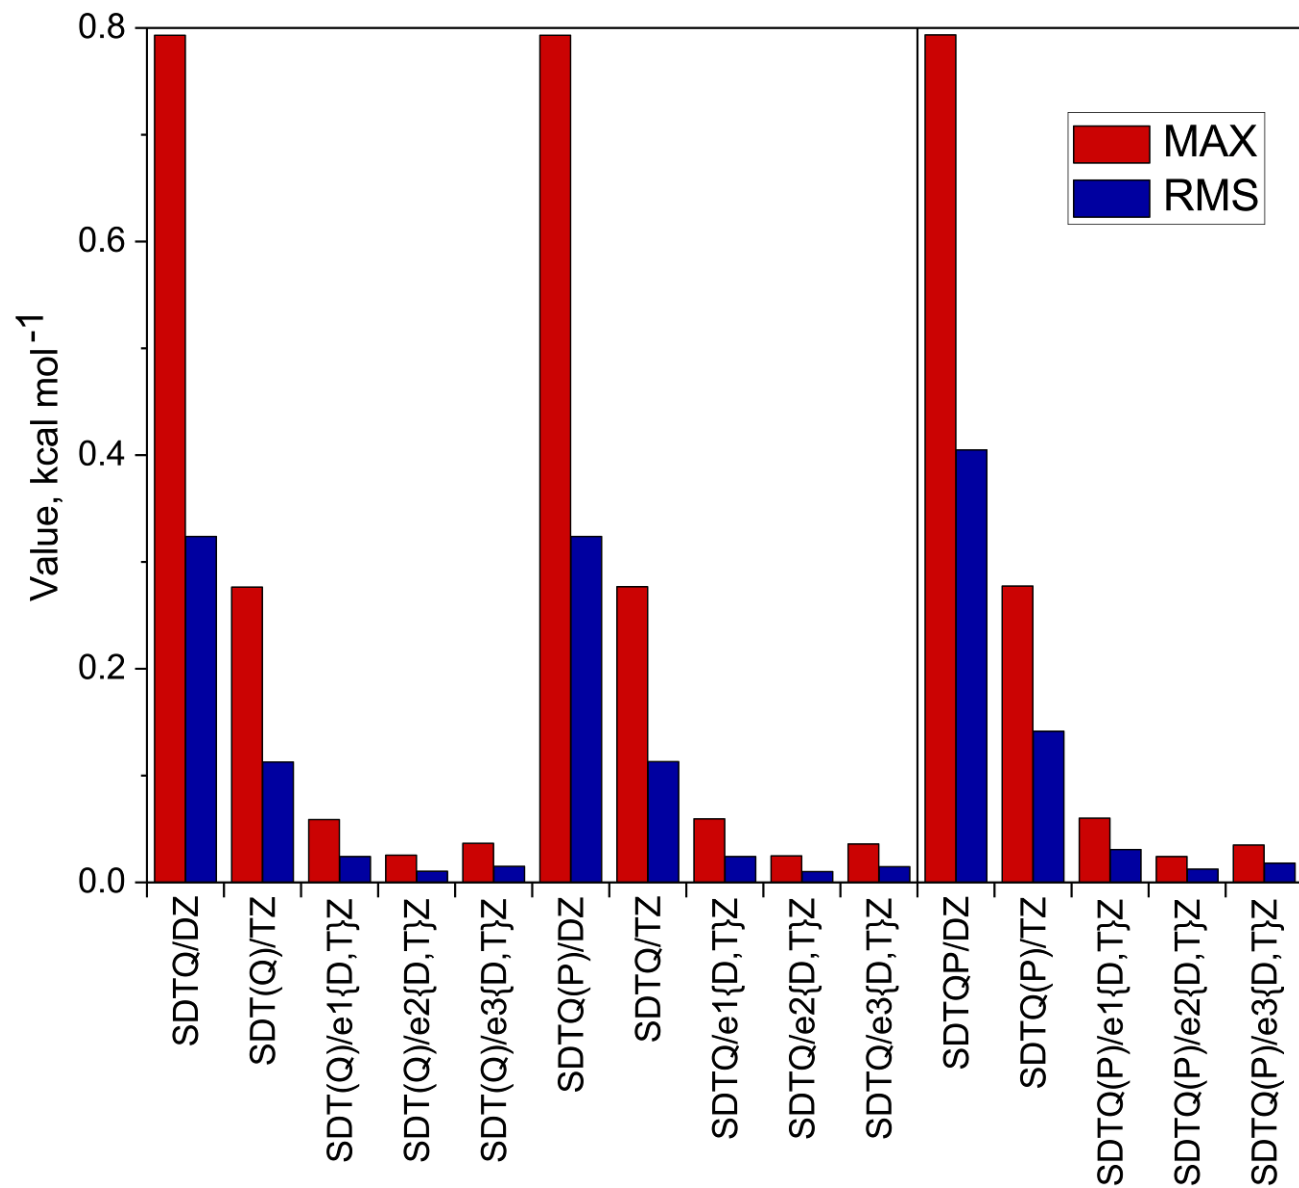

Figure S8. Maximum (MAX) and root mean square (RMS) values for the absolute deviations obtained at a given level of theory. Reference values are computed as the mean of SDTQ(P) (left panel) or SDTQP (right panel) eN{D,T}Z (N = 1 – 3) values.

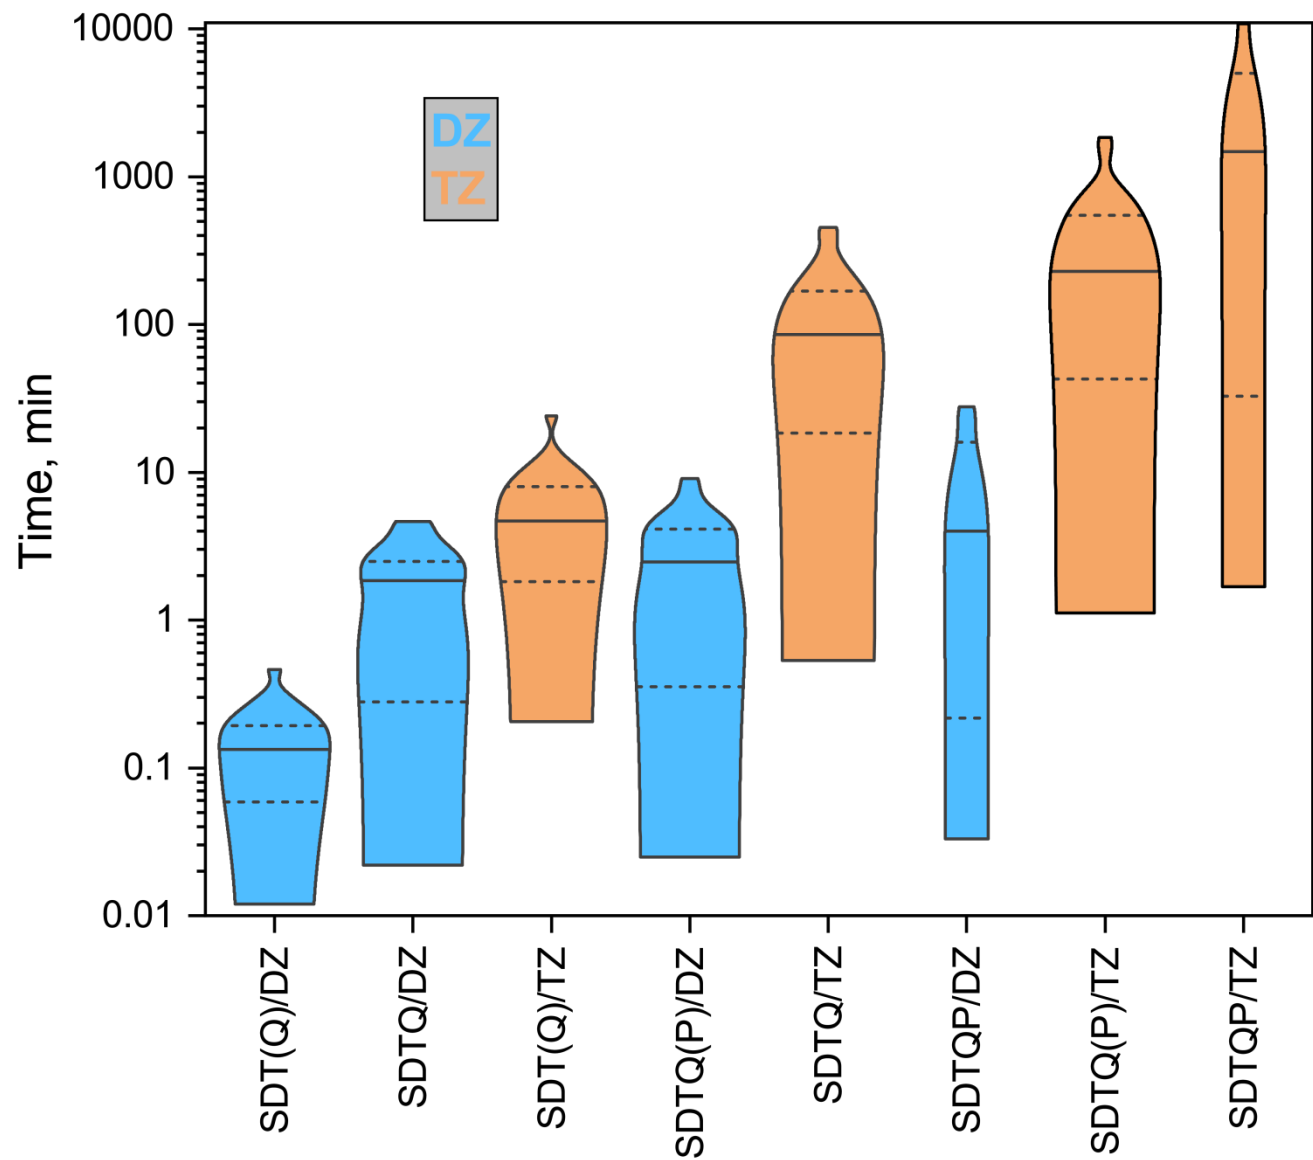

Figure S9. Computational times for different levels of theory. The times for the FC and CV calculations were combined and used for the visualization. The median (solid), 25<sup>th</sup>, and 75<sup>th</sup> percentiles (dash) are shown.

Batch #5

Table S9. Absolute deviations of core-valence corrections to the atomization energy from reference values in kcal mol<sup>-1</sup>. Reference values (REFERENCE) are computed as the mean of SDT(Q)/eN{aT,aQ}Z (N = 1 – 3) values. The range of SDT(Q)/eN{aT,aQ}Z (N = 1 – 3) values (RANGE, RMS = 0.0048 kcal mol<sup>-1</sup>) and the absolute deviations for a given coupled-cluster method and basis set (including extrapolated results) are shown. Color encoding shows the highest (red) and the lowest (green) values. Maximum (MAX), mean (MAD), root mean square (RMS), and standard deviation (SD) are provided at the bottom of the Table.

| System   | REFERENCE | RANGE  | SD(T)/aDZ | SDT/aDZ | SDT(Q)/aDZ | SD(T)/aTZ | SDT/aTZ | SDT(Q)/aTZ | SD(T)/aQZ | SDT/aQZ | SDT(Q)/aQZ | SD(T)/e1{aD,aT}Z | SDT/e1{aD,aT}Z | SD(T)/e1{aT,aQ}Z | SDT/e1{aT,aQ}Z | SDT(Q)/e1{aT,aQ}Z | SD(T)/e2{aD,aT}Z | SDT/e2{aD,aT}Z | SDT(Q)/e2{aD,aT}Z | SD(T)/e2{aT,aQ}Z | SDT/e2{aT,aQ}Z | SDT(Q)/e2{aT,aQ}Z | SD(T)/e3{aD,aT}Z | SDT/e3{aD,aT}Z | SDT(Q)/e3{aD,aT}Z | SD(T)/e3{aT,aQ}Z | SDT/e3{aT,aQ}Z | SDT(Q)/e3{aT,aQ}Z |        |
|----------|-----------|--------|-----------|---------|------------|-----------|---------|------------|-----------|---------|------------|------------------|----------------|------------------|----------------|-------------------|------------------|----------------|-------------------|------------------|----------------|-------------------|------------------|----------------|-------------------|------------------|----------------|-------------------|--------|
| alh      | -0.0789   | 0.0033 | 0.0855    | 0.0996  | 0.0934     | 0.0094    | 0.0380  | 0.0252     | 0.0043    | 0.0253  | 0.0110     | 0.0227           | 0.0120         | 0.0035           | 0.0143         | 0.0161            | 0.0006           | 0.0337         | 0.0021            | 0.0134           | 0.0140         | 0.0166            | 0.0013           | 0.0367         | 0.0006            | 0.0161           | 0.0168         | 0.0138            | 0.0020 |
| bh       | 0.2304    | 0.0029 | 0.0865    | 0.0814  | 0.0831     | 0.0391    | 0.0258  | 0.0281     | 0.0248    | 0.0101  | 0.0124     | 0.0191           | 0.0024         | 0.0049           | 0.0143         | 0.0013            | 0.0010           | 0.0122         | 0.0051            | 0.0026           | 0.0146         | 0.0014            | 0.0009           | 0.0104         | 0.0079            | 0.0052           | 0.0117         | 0.0042            | 0.0019 |
| ch2-sing | 0.5016    | 0.0043 | 0.1085    | 0.0958  | 0.0953     | 0.0748    | 0.0420  | 0.0417     | 0.0559    | 0.0191  | 0.0185     | 0.0606           | 0.0194         | 0.0191           | 0.0421         | 0.0024            | 0.0016           | 0.0558         | 0.0130            | 0.0127           | 0.0425         | 0.0018            | 0.0011           | 0.0544         | 0.0095            | 0.0092           | 0.0387         | 0.0018            | 0.0027 |
| h2o      | 0.4897    | 0.0037 | 0.0629    | 0.0654  | 0.0604     | 0.0444    | 0.0417  | 0.0358     | 0.0272    | 0.0222  | 0.0158     | 0.0367           | 0.0318         | 0.0254           | 0.0146         | 0.0079            | 0.0013           | 0.0340         | 0.0287            | 0.0223           | 0.0149         | 0.0077            | 0.0011           | 0.0332         | 0.0274            | 0.0208           | 0.0114         | 0.0043            | 0.0024 |
| hcl      | 0.2460    | 0.0080 | 0.0090    | 0.0185  | 0.0148     | 0.0686    | 0.0612  | 0.0661     | 0.0288    | 0.0236  | 0.0290     | 0.1012           | 0.0947         | 0.1001           | 0.0002         | 0.0038            | 0.0019           | 0.1124         | 0.1061            | 0.1115           | 0.0005         | 0.0026            | 0.0031           | 0.1155         | 0.1094            | 0.1151           | 0.0076         | 0.0107            | 0.0050 |
| hf       | 0.2353    | 0.0015 | 0.0278    | 0.0302  | 0.0267     | 0.0163    | 0.0196  | 0.0140     | 0.0095    | 0.0123  | 0.0062     | 0.0114           | 0.0151         | 0.0086           | 0.0046         | 0.0070            | 0.0005           | 0.0097         | 0.0135            | 0.0070           | 0.0047         | 0.0069            | 0.0005           | 0.0093         | 0.0132            | 0.0063           | 0.0033         | 0.0056            | 0.0010 |
| ch       | 0.1958    | 0.0011 | 0.0090    | 0.0056  | 0.0057     | 0.0225    | 0.0108  | 0.0111     | 0.0179    | 0.0048  | 0.0049     | 0.0282           | 0.0130         | 0.0134           | 0.0146         | 0.0004            | 0.0005           | 0.0301         | 0.0143            | 0.0147           | 0.0147         | 0.0001            | 0.0002           | 0.0307         | 0.0139            | 0.0144           | 0.0137         | 0.0008            | 0.0007 |
| hs       | 0.2219    | 0.0065 | 0.0034    | 0.0089  | 0.0095     | 0.0527    | 0.0542  | 0.0535     | 0.0209    | 0.0242  | 0.0235     | 0.0763           | 0.0808         | 0.0801           | 0.0024         | 0.0023            | 0.0015           | 0.0844         | 0.0895            | 0.0887           | 0.0018         | 0.0033            | 0.0025           | 0.0867         | 0.0925            | 0.0917           | 0.0082         | 0.0032            | 0.0040 |
| nh2      | 0.4369    | 0.0032 | 0.0192    | 0.0192  | 0.0168     | 0.0426    | 0.0333  | 0.0315     | 0.0273    | 0.0159  | 0.0140     | 0.0524           | 0.0393         | 0.0377           | 0.0162         | 0.0032            | 0.0012           | 0.0558         | 0.0420            | 0.0404           | 0.0165         | 0.0029            | 0.0009           | 0.0567         | 0.0419            | 0.0404           | 0.0134         | 0.0001            | 0.0021 |
| oh       | 0.2078    | 0.0012 | 0.0010    | 0.0002  | 0.0022     | 0.0163    | 0.0155  | 0.0121     | 0.0109    | 0.0091  | 0.0053     | 0.0236           | 0.0219         | 0.0181           | 0.0069         | 0.0044            | 0.0004           | 0.0262         | 0.0242            | 0.0204           | 0.0070         | 0.0043            | 0.0004           | 0.0268         | 0.0247            | 0.0207           | 0.0059         | 0.0032            | 0.0008 |
| sih      | 0.0511    | 0.0040 | 0.0031    | 0.0062  | 0.0010     | 0.0181    | 0.0410  | 0.0317     | 0.0003    | 0.0242  | 0.0139     | 0.0244           | 0.0556         | 0.0447           | 0.0126         | 0.0120            | 0.0009           | 0.0266         | 0.0593            | 0.0484           | 0.0123         | 0.0126            | 0.0016           | 0.0272         | 0.0620            | 0.0504           | 0.0159         | 0.0089            | 0.0024 |
| ch2-trip | 0.8526    | 0.0106 | 0.3198    | 0.3201  | 0.3226     | 0.0940    | 0.0920  | 0.0956     | 0.0409    | 0.0382  | 0.0421     | 0.0011           | 0.0041         | 0.0001           | 0.0022         | 0.0011            | 0.0030           | 0.0339         | 0.0370            | 0.0328           | 0.0032         | 0.0003            | 0.0038           | 0.0428         | 0.0462            | 0.0418           | 0.0076         | 0.0110            | 0.0068 |
| nh       | 0.1699    | 0.0008 | 0.0300    | 0.0298  | 0.0308     | 0.0130    | 0.0085  | 0.0076     | 0.0098    | 0.0044  | 0.0034     | 0.0310           | 0.0247         | 0.0238           | 0.0075         | 0.0014            | 0.0003           | 0.0372         | 0.0305            | 0.0297           | 0.0075         | 0.0013            | 0.0002           | 0.0390         | 0.0317            | 0.0309           | 0.0069         | 0.0007            | 0.0005 |
|          |           | MAX    | 0.3198    | 0.3201  | 0.3226     | 0.0940    | 0.0920  | 0.0956     | 0.0559    | 0.0382  | 0.0421     | 0.1012           | 0.0947         | 0.1001           | 0.0421         | 0.0161            | 0.0030           | 0.1124         | 0.1061            | 0.1115           | 0.0425         | 0.0166            | 0.0038           | 0.1155         | 0.1094            | 0.1151           | 0.0387         | 0.0138            | 0.0068 |
|          |           | MAD    | 0.0589    | 0.0601  | 0.0586     | 0.0394    | 0.0372  | 0.0349     | 0.0214    | 0.0180  | 0.0154     | 0.0376           | 0.0319         | 0.0292           | 0.0117         | 0.0049            | 0.0011           | 0.0425         | 0.0358            | 0.0342           | 0.0119         | 0.0047            | 0.0013           | 0.0438         | 0.0370            | 0.0356           | 0.0124         | 0.0053            | 0.0025 |
|          |           | RMS    | 0.1019    | 0.1020  | 0.1018     | 0.0471    | 0.0433  | 0.0424     | 0.0260    | 0.0202  | 0.0187     | 0.0462           | 0.0422         | 0.0412           | 0.0156         | 0.0067            | 0.0013           | 0.0507         | 0.0471            | 0.0462           | 0.0157         | 0.0067            | 0.0017           | 0.0522         | 0.0489            | 0.0480           | 0.0150         | 0.0068            | 0.0030 |
|          |           | SD     | 0.0866    | 0.0857  | 0.0866     | 0.0269    | 0.0230  | 0.0250     | 0.0154    | 0.0097  | 0.0110     | 0.0280           | 0.0288         | 0.0302           | 0.0107         | 0.0047            | 0.0008           | 0.0288         | 0.0319            | 0.0324           | 0.0108         | 0.0050            | 0.0011           | 0.0296         | 0.0334            | 0.0336           | 0.0089         | 0.0045            | 0.0018 |

Table S10. Differences between absolute deviations obtained at given levels of theory in kcal mol<sup>-1</sup>. Reference values are computed as the mean of SDT(Q)/eN{aT,aQ}Z (N = 1 – 3) values. Positive values are highlighted in red. Maximum (MAX), mean (MAD), root mean square (RMS), and standard deviation (SD) are provided at the bottom of the Table.

| System   | $\frac{\text{SDT/aDZ}}{\text{SD(T)/aTZ}}$ | $\frac{\text{SDT(Q)/aDZ}}{\text{SD(T)/aTZ}}$ | $\frac{\text{SDT/aTZ}}{\text{SD(T)/aQZ}}$ | $\frac{\text{SDT(Q)/aTZ}}{\text{SD(T)/aQZ}}$ | $\frac{\text{SDT/e1\{aD,aT\}Z}}{\text{SD(T)/e1\{aT,aQ\}Z}}$ | $\frac{\text{SDT(Q)/e1\{aD,aT\}Z}}{\text{SD(T)/e1\{aT,aQ\}Z}}$ | $\frac{\text{SDT/e2\{aD,aT\}Z}}{\text{SD(T)/e2\{aT,aQ\}Z}}$ | $\frac{\text{SDT(Q)/e2\{aD,aT\}Z}}{\text{SD(T)/e2\{aT,aQ\}Z}}$ | $\frac{\text{SDT/e3\{aD,aT\}Z}}{\text{SD(T)/e3\{aT,aQ\}Z}}$ | $\frac{\text{SDT(Q)/e3\{aD,aT\}Z}}{\text{SD(T)/e3\{aT,aQ\}Z}}$ |
|----------|-------------------------------------------|----------------------------------------------|-------------------------------------------|----------------------------------------------|-------------------------------------------------------------|----------------------------------------------------------------|-------------------------------------------------------------|----------------------------------------------------------------|-------------------------------------------------------------|----------------------------------------------------------------|
| alh      | 0.0902                                    | 0.0555                                       | 0.0337                                    | -0.0001                                      | -0.0022                                                     | -0.0126                                                        | -0.0119                                                     | -0.0032                                                        | -0.0161                                                     | 0.0023                                                         |
| bh       | 0.0423                                    | 0.0573                                       | 0.0010                                    | 0.0180                                       | -0.0119                                                     | 0.0036                                                         | -0.0094                                                     | 0.0012                                                         | -0.0038                                                     | 0.0010                                                         |
| ch2–sing | 0.0210                                    | 0.0532                                       | -0.0139                                   | 0.0225                                       | -0.0228                                                     | 0.0167                                                         | -0.0295                                                     | 0.0108                                                         | -0.0292                                                     | 0.0074                                                         |
| h2o      | 0.0210                                    | 0.0187                                       | 0.0145                                    | 0.0136                                       | 0.0172                                                      | 0.0175                                                         | 0.0138                                                      | 0.0146                                                         | 0.0160                                                      | 0.0165                                                         |
| hcl      | -0.0501                                   | -0.0463                                      | 0.0324                                    | 0.0425                                       | 0.0945                                                      | 0.0963                                                         | 0.1056                                                      | 0.1089                                                         | 0.1018                                                      | 0.1043                                                         |
| hf       | 0.0140                                    | 0.0071                                       | 0.0101                                    | 0.0017                                       | 0.0105                                                      | 0.0016                                                         | 0.0088                                                      | 0.0000                                                         | 0.0098                                                      | 0.0006                                                         |
| ch       | -0.0169                                   | -0.0051                                      | -0.0071                                   | 0.0063                                       | -0.0016                                                     | 0.0130                                                         | -0.0004                                                     | 0.0146                                                         | 0.0002                                                      | 0.0136                                                         |
| hs       | -0.0438                                   | -0.0448                                      | 0.0334                                    | 0.0293                                       | 0.0784                                                      | 0.0778                                                         | 0.0877                                                      | 0.0854                                                         | 0.0842                                                      | 0.0885                                                         |
| nh2      | -0.0234                                   | -0.0165                                      | 0.0060                                    | 0.0156                                       | 0.0231                                                      | 0.0345                                                         | 0.0255                                                      | 0.0375                                                         | 0.0285                                                      | 0.0404                                                         |
| oh       | -0.0161                                   | -0.0132                                      | 0.0046                                    | 0.0030                                       | 0.0150                                                      | 0.0137                                                         | 0.0173                                                      | 0.0162                                                         | 0.0188                                                      | 0.0175                                                         |
| sih      | -0.0119                                   | -0.0400                                      | 0.0406                                    | 0.0075                                       | 0.0430                                                      | 0.0327                                                         | 0.0470                                                      | 0.0358                                                         | 0.0461                                                      | 0.0414                                                         |
| ch2–trip | 0.2262                                    | 0.2307                                       | 0.0510                                    | 0.0575                                       | 0.0019                                                      | -0.0010                                                        | 0.0339                                                      | 0.0326                                                         | 0.0387                                                      | 0.0309                                                         |
| nh       | 0.0168                                    | 0.0223                                       | -0.0013                                   | 0.0032                                       | 0.0172                                                      | 0.0224                                                         | 0.0230                                                      | 0.0284                                                         | 0.0248                                                      | 0.0302                                                         |
| MAX      | 0.2262                                    | 0.2307                                       | 0.0360                                    | 0.0575                                       | 0.0526                                                      | 0.0840                                                         | 0.0636                                                      | 0.0949                                                         | 0.0707                                                      | 0.1013                                                         |
| MAD      | 0.0207                                    | 0.0214                                       | 0.0158                                    | 0.0170                                       | 0.0202                                                      | 0.0243                                                         | 0.0239                                                      | 0.0295                                                         | 0.0246                                                      | 0.0304                                                         |
| RMS      | 0.0549                                    | 0.0585                                       | 0.0173                                    | 0.0221                                       | 0.0266                                                      | 0.0345                                                         | 0.0314                                                      | 0.0395                                                         | 0.0339                                                      | 0.0413                                                         |
| SD       | 0.0588                                    | 0.0636                                       | 0.0076                                    | 0.0153                                       | 0.0181                                                      | 0.0255                                                         | 0.0211                                                      | 0.0274                                                         | 0.0245                                                      | 0.0291                                                         |

Table S11. Computational times for coupled-cluster calculations with augmented basis sets, in min. System name (System), anZ basis set cardinal number (Cardinal), and times for the computations using optimized CCSD(T) program “ccsd” or string-based CC program “mrcc” are provided.

| System   | Cardinal | Optimized CCSD(T) | Automated string-based CCSD(T) | Automated string-based CCSDT | Automated string-based CCSDT(Q) |
|----------|----------|-------------------|--------------------------------|------------------------------|---------------------------------|
| Al       | 2        | 0.014             | 0.033                          | 0.311                        | 0.453                           |
| alh      | 2        | 0.007             | 0.115                          | 1.177                        | 1.586                           |
| B        | 2        | 0.007             | 0.014                          | 0.031                        | 0.04                            |
| bh       | 2        | 0.003             | 0.049                          | 0.132                        | 0.167                           |
| C        | 2        | 0.007             | 0.013                          | 0.034                        | 0.043                           |
| ch       | 2        | 0.017             | 0.064                          | 0.266                        | 0.33                            |
| ch2-sing | 2        | 0.007             | 0.13                           | 0.592                        | 0.795                           |
| ch2-trip | 2        | 0.036             | 0.147                          | 0.605                        | 0.846                           |
| Cl       | 2        | 0.017             | 0.04                           | 0.628                        | 0.894                           |
| F        | 2        | 0.007             | 0.016                          | 0.088                        | 0.118                           |
| h2o      | 2        | 0.007             | 0.133                          | 0.853                        | 1.206                           |
| hcl      | 2        | 0.009             | 0.119                          | 1.953                        | 2.671                           |
| hf       | 2        | 0.005             | 0.057                          | 0.366                        | 0.479                           |
| hs       | 2        | 0.035             | 0.159                          | 2.834                        | 3.627                           |
| N        | 2        | 0.006             | 0.012                          | 0.037                        | 0.048                           |
| nh       | 2        | 0.017             | 0.07                           | 0.326                        | 0.408                           |
| nh2      | 2        | 0.041             | 0.177                          | 1.059                        | 1.416                           |
| O        | 2        | 0.007             | 0.02                           | 0.08                         | 0.117                           |
| oh       | 2        | 0.017             | 0.078                          | 0.464                        | 0.584                           |
| P        | 2        | 0.013             | 0.033                          | 0.359                        | 0.521                           |
| S        | 2        | 0.015             | 0.047                          | 0.66                         | 1.033                           |
| Si       | 2        | 0.014             | 0.039                          | 0.431                        | 0.709                           |
| sih      | 2        | 0.036             | 0.158                          | 2.112                        | 2.704                           |
| Al       | 3        | 0.241             | 0.48                           | 4.223                        | 14.415                          |
| alh      | 3        | 0.072             | 2.205                          | 16.476                       | 41.813                          |
| B        | 3        | 0.1               | 0.202                          | 0.403                        | 0.717                           |
| bh       | 3        | 0.03              | 1.145                          | 2.511                        | 4.211                           |
| C        | 3        | 0.093             | 0.188                          | 0.477                        | 0.821                           |
| ch       | 3        | 0.446             | 1.587                          | 4.821                        | 8.063                           |
| ch2-sing | 3        | 0.092             | 3.313                          | 10.604                       | 23.886                          |
| ch2-trip | 3        | 1.141             | 3.897                          | 12.139                       | 28.503                          |

| System   | Cardinal | Optimized CCSD(T) | Automated string-based CCSD(T) | Automated string-based CCSDT | Automated string-based CCSDT(Q) |
|----------|----------|-------------------|--------------------------------|------------------------------|---------------------------------|
| Cl       | 3        | 0.233             | 0.618                          | 9.778                        | 29.695                          |
| F        | 3        | 0.101             | 0.217                          | 1.157                        | 2.484                           |
| h2o      | 3        | 0.094             | 3.104                          | 15.048                       | 38.587                          |
| hcl      | 3        | 0.096             | 2.15                           | 31.985                       | 85.444                          |
| hf       | 3        | 0.038             | 1.155                          | 5.863                        | 12.336                          |
| hs       | 3        | 0.796             | 3.029                          | 47.243                       | 104.614                         |
| N        | 3        | 0.092             | 0.176                          | 0.487                        | 0.937                           |
| nh       | 3        | 0.449             | 1.549                          | 5.591                        | 9.955                           |
| nh2      | 3        | 1.265             | 4.107                          | 19.056                       | 43.018                          |
| O        | 3        | 0.1               | 0.269                          | 1.076                        | 2.692                           |
| oh       | 3        | 0.436             | 1.637                          | 7.911                        | 14.32                           |
| P        | 3        | 0.21              | 0.443                          | 4.525                        | 11.408                          |
| S        | 3        | 0.245             | 0.639                          | 8.315                        | 25.226                          |
| Si       | 3        | 0.229             | 0.577                          | 5.369                        | 17.375                          |
| sih      | 3        | 0.858             | 2.943                          | 33.702                       | 73.271                          |
| Al       | 4        | 2.659             | 4.482                          | 33.04                        | 199.558                         |
| alh      | 4        | 0.638             | 23.346                         | 199.723                      | 934.996                         |
| B        | 4        | 1.243             | 2.028                          | 3.664                        | 8.546                           |
| bh       | 4        | 0.304             | 13.612                         | 26.089                       | 70.991                          |
| C        | 4        | 1.237             | 2.165                          | 4.576                        | 13.034                          |
| ch       | 4        | 5.815             | 20.224                         | 61.084                       | 222.772                         |
| ch2-sing | 4        | 0.951             | 41.825                         | 131.488                      | 587.681                         |
| ch2-trip | 4        | 15.838            | 56.195                         | 171.765                      | 750.704                         |
| Cl       | 4        | 2.516             | 5.179                          | 70.873                       | 415.569                         |
| F        | 4        | 1.204             | 2.152                          | 8.902                        | 32.449                          |
| h2o      | 4        | 0.93              | 38.338                         | 195.065                      | 1017.751                        |
| hcl      | 4        | 0.706             | 22.366                         | 387.072                      | 1981.593                        |
| hf       | 4        | 0.363             | 12.525                         | 62.579                       | 253.012                         |
| hs       | 4        | 9.689             | 35.22                          | 701.283                      | 3192.258                        |
| N        | 4        | 1.118             | 1.88                           | 4.266                        | 11.983                          |
| nh       | 4        | 5.804             | 17.586                         | 61.339                       | 189.065                         |
| nh2      | 4        | 17.476            | 65.175                         | 320.395                      | 1736.788                        |
| O        | 4        | 1.316             | 2.478                          | 8.222                        | 36.497                          |



| <b>System</b> | <b>Cardinal</b> | <b>Optimized CCSD(T)</b> | <b>Automated string-based CCSD(T)</b> | <b>Automated string-based CCSDT</b> | <b>Automated string-based CCSDT(Q)</b> |
|---------------|-----------------|--------------------------|---------------------------------------|-------------------------------------|----------------------------------------|
| oh            | 4               | 5.803                    | 20.598                                | 105.367                             | 451.34                                 |
| P             | 4               | 2.385                    | 4.112                                 | 34.818                              | 162.057                                |
| S             | 4               | 2.763                    | 5.083                                 | 63.269                              | 342.929                                |
| Si            | 4               | 2.45                     | 4.696                                 | 39.187                              | 233.158                                |
| sih           | 4               | 10.388                   | 36.112                                | 494.864                             | 2236.11                                |

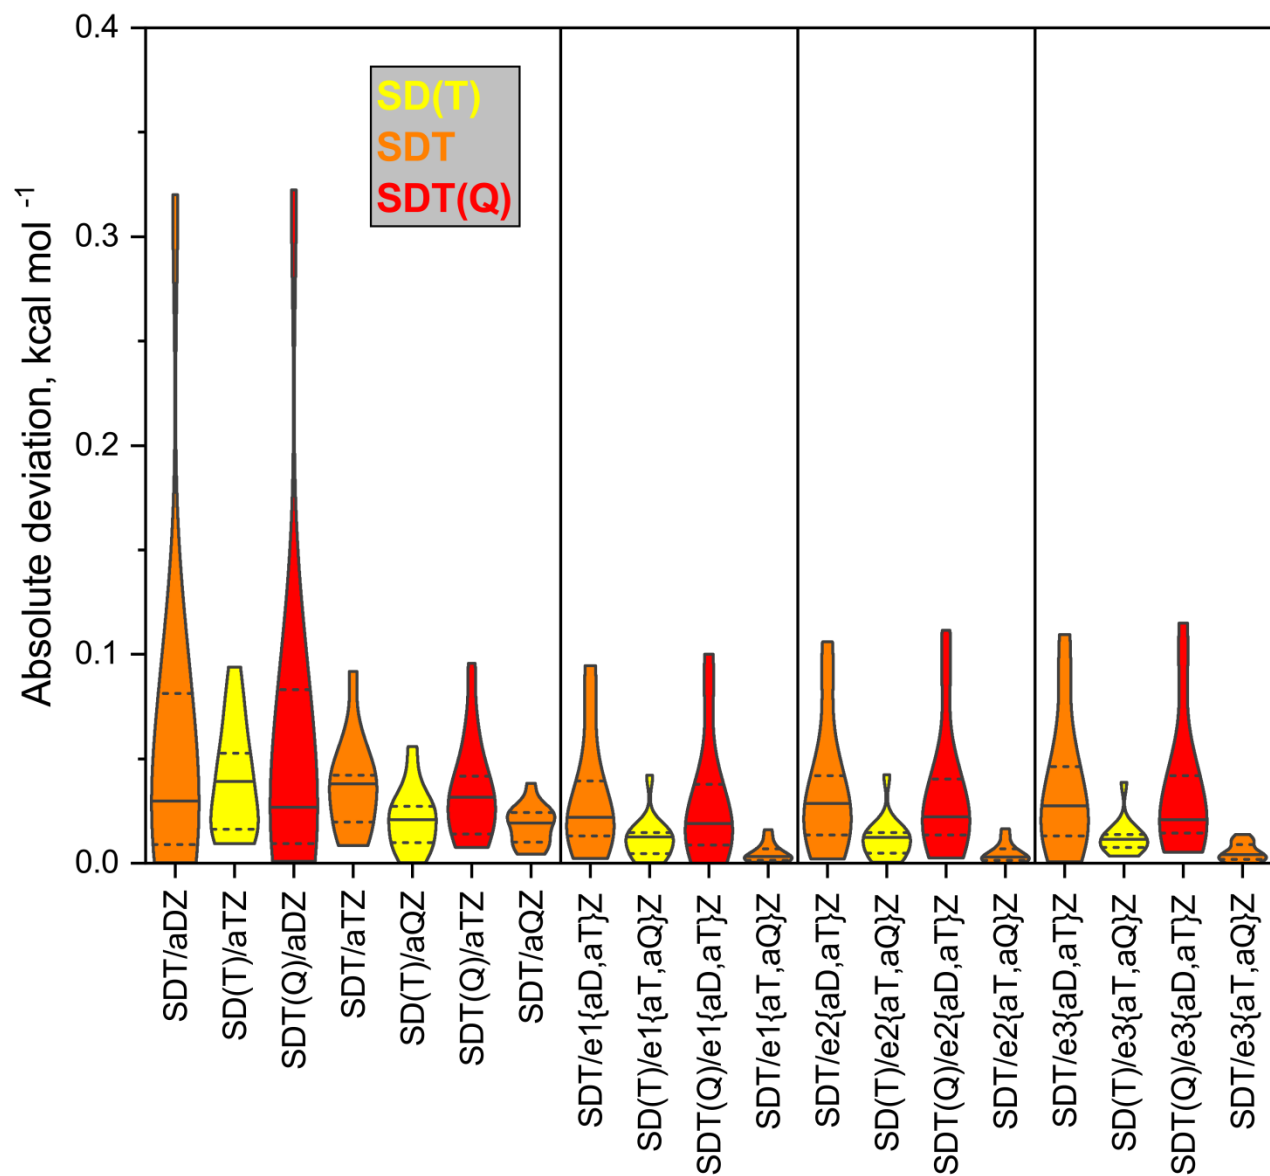

Figure S10. Violin plots of the absolute deviations obtained at a given level of theory. Reference values are computed as the mean of SDT(Q)/eN{aT,aQ}Z (N = 1 – 3) values. The median (solid), 25<sup>th</sup>, and 75<sup>th</sup> percentiles (dash) are shown. The highest point of a plot represents the maximum deviation.

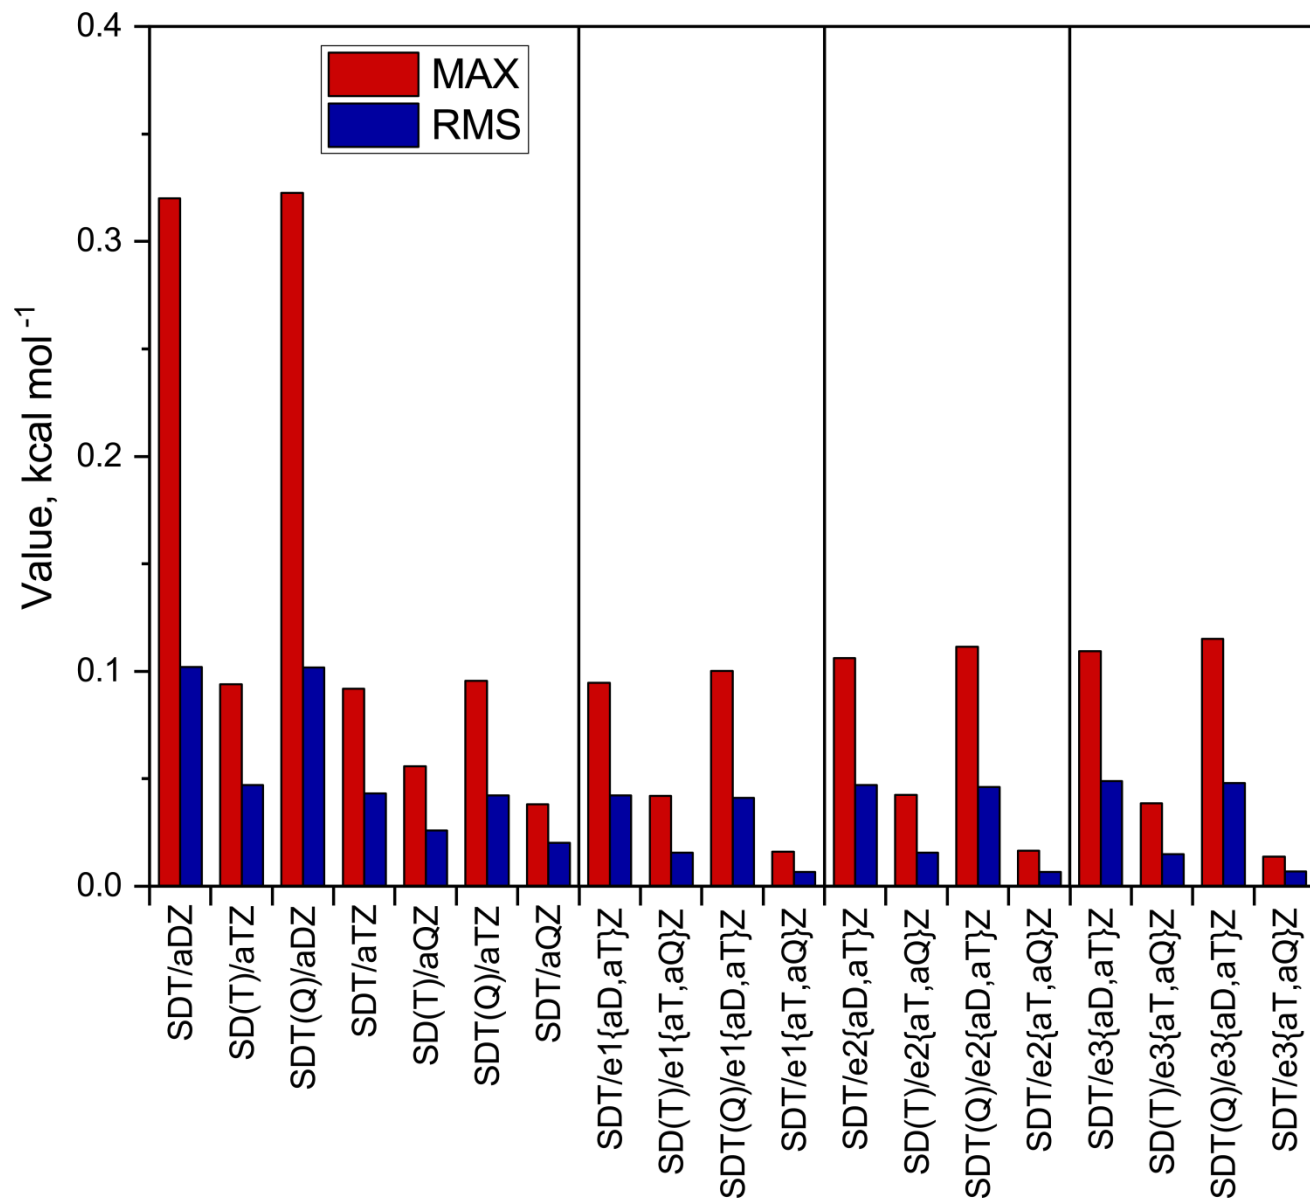

Figure S11. Maximum (MAX) and root mean square (RMS) values for the absolute deviations obtained at a given level of theory. Reference values are computed as the mean of SDT(Q)/eN{aT,aQ}Z (N = 1 – 3) values.

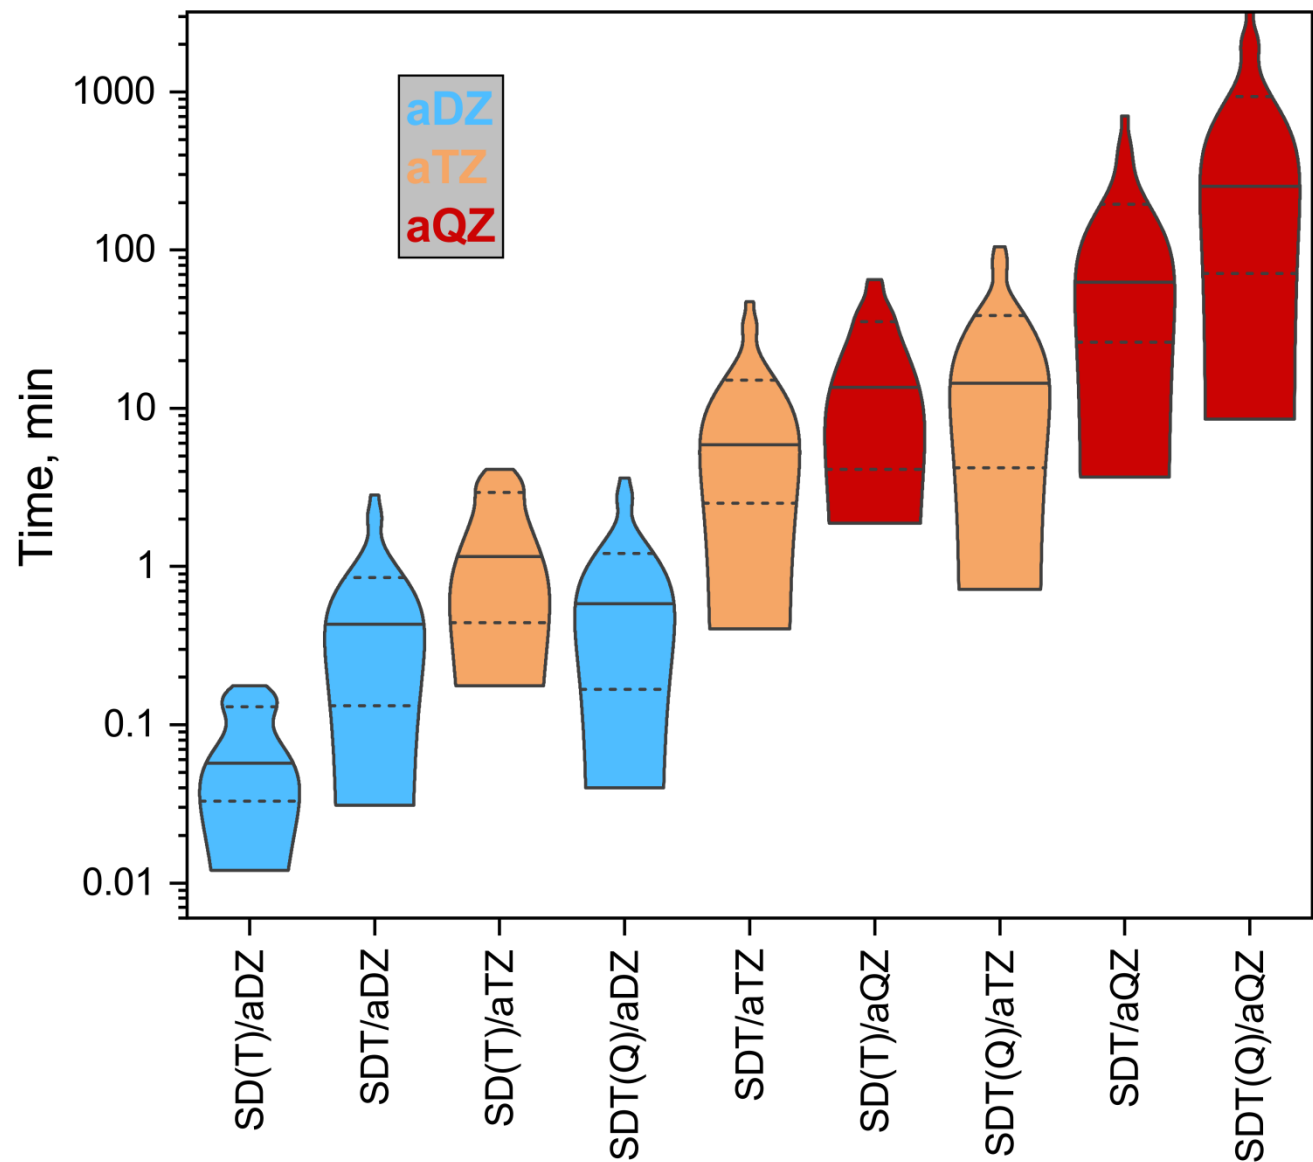

Figure S12. Computational times for different levels of theory. The times for the FC and CV calculations were combined and used for the visualization. The data for the SD(T) method were obtained using the string-based CC program “mrcc” for systems for which SDT(Q) computations were performed. The median (solid), 25<sup>th</sup>, and 75<sup>th</sup> percentiles (dash) are shown.

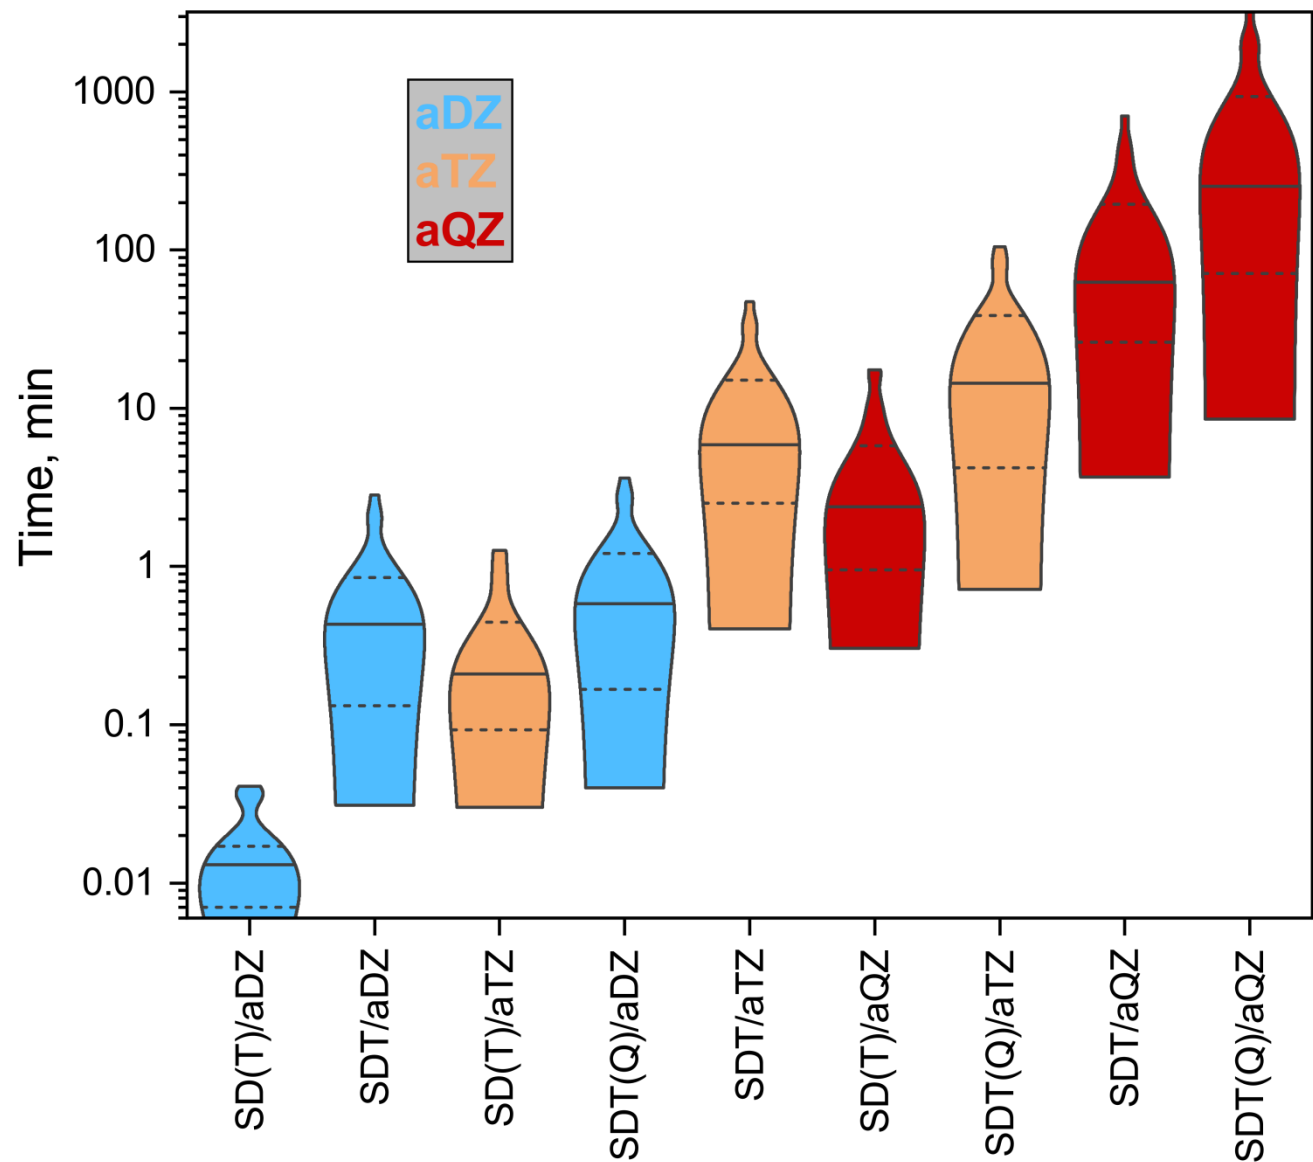

Figure S13. Computational times for different levels of theory. The times for the FC and CV calculations were combined and used for the visualization. The data for the SD(T) method were obtained using the optimized CCSD(T) program “ccsd” for systems for which SDT(Q) computations were performed. The median (solid), 25<sup>th</sup>, and 75<sup>th</sup> percentiles (dash) are shown.

Batch #6

Table S12. Absolute deviations of core-valence corrections to the atomization energy from reference values in kcal mol<sup>-1</sup>. Reference values (REFERENCE) are computed as the mean of SDT(Q)/eN{T,Q}Z (N = 1 – 3) values. The geometries were optimized using SD(T)/nZ method with the basis set and frozen core approximation type corresponding to the given energy evaluation (FC-SD(T) for the FC component of core-valence correction and CV-SD(T) for the CV one). The range of SDT(Q)/eN{T,Q}Z (N = 1 – 3) values (RANGE, RMS = 0.0106 kcal mol<sup>-1</sup>) and the absolute deviations for a given coupled-cluster method and basis set (including extrapolated results) are shown. Color encoding shows the highest (red) and the lowest (green) values. Maximum (MAX), mean (MAD), root mean square (RMS), and standard deviation (SD) are provided at the bottom of the Table.

| System   | REFERENCE | RANGE  | SD(T)/DZ | SDT/DZ | SDT(Q)/DZ | SD(T)/TZ | SDT/TZ | SDT(Q)/TZ | SD(T)/QZ | SDT/QZ | SDT(Q)/QZ | SD(T)/e1{D,T}Z | SDT/e1{D,T}Z | SDT(Q)/e1{D,T}Z | SD(T)/e1{T,Q}Z | SDT/e1{T,Q}Z | SDT(Q)/e1{T,Q}Z | SD(T)/e2{D,T}Z | SDT/e2{D,T}Z | SDT(Q)/e2{D,T}Z | SD(T)/e2{T,Q}Z | SDT/e2{T,Q}Z | SDT(Q)/e2{T,Q}Z | SD(T)/e3{D,T}Z | SDT/e3{D,T}Z | SDT(Q)/e3{D,T}Z | SD(T)/e3{T,Q}Z | SDT/e3{T,Q}Z | SDT(Q)/e3{T,Q}Z |
|----------|-----------|--------|----------|--------|-----------|----------|--------|-----------|----------|--------|-----------|----------------|--------------|-----------------|----------------|--------------|-----------------|----------------|--------------|-----------------|----------------|--------------|-----------------|----------------|--------------|-----------------|----------------|--------------|-----------------|
| alh      | -0.0701   | 0.0047 | 0.1856   | 0.1725 | 0.1771    | 0.0620   | 0.0348 | 0.0469    | 0.0355   | 0.0062 | 0.0206    | 0.0102         | 0.0230       | 0.0077          | 0.0166         | 0.0143       | 0.0017          | 0.0096         | 0.0439       | 0.0286          | 0.0170         | 0.0144       | 0.0014          | 0.0122         | 0.0480       | 0.0313          | 0.0118         | 0.0195       | 0.0030          |
| bf       | 0.8503    | 0.0186 | 0.4681   | 0.4609 | 0.4559    | 0.2123   | 0.1963 | 0.1889    | 0.1057   | 0.0866 | 0.0795    | 0.1097         | 0.0899       | 0.0816          | 0.0338         | 0.0125       | 0.0056          | 0.0766         | 0.0561       | 0.0478          | 0.0354         | 0.0135       | 0.0065          | 0.0723         | 0.0508       | 0.0420          | 0.0166         | 0.0052       | 0.0121          |
| bh       | 0.2343    | 0.0039 | 0.1489   | 0.1444 | 0.1457    | 0.0499   | 0.0371 | 0.0393    | 0.0290   | 0.0147 | 0.0170    | 0.0090         | 0.0072       | 0.0047          | 0.0144         | 0.0011       | 0.0013          | 0.0057         | 0.0225       | 0.0200          | 0.0147         | 0.0011       | 0.0013          | 0.0076         | 0.0254       | 0.0227          | 0.0108         | 0.0050       | 0.0026          |
| bh3      | 1.1811    | 0.0214 | 0.7185   | 0.7174 | 0.7222    | 0.1862   | 0.1837 | 0.1905    | 0.0808   | 0.0769 | 0.0843    | 0.0380         | 0.0410       | 0.0335          | 0.0032         | 0.0018       | 0.0061          | 0.1250         | 0.1281       | 0.1205          | 0.0051         | 0.0002       | 0.0076          | 0.1363         | 0.1396       | 0.1317          | 0.0166         | 0.0218       | 0.0138          |
| ch2-sing | 0.5126    | 0.0067 | 0.2021   | 0.1891 | 0.1884    | 0.1029   | 0.0690 | 0.0688    | 0.0680   | 0.0301 | 0.0297    | 0.0621         | 0.0195       | 0.0195          | 0.0437         | 0.0030       | 0.0023          | 0.0476         | 0.0034       | 0.0034          | 0.0443         | 0.0026       | 0.0020          | 0.0458         | 0.0007       | 0.0006          | 0.0378         | 0.0037       | 0.0044          |
| co       | 1.2042    | 0.0202 | 0.5853   | 0.5819 | 0.5687    | 0.2615   | 0.2336 | 0.2212    | 0.1364   | 0.1032 | 0.0913    | 0.1352         | 0.0970       | 0.0849          | 0.0550         | 0.0179       | 0.0064          | 0.0996         | 0.0594       | 0.0474          | 0.0569         | 0.0185       | 0.0069          | 0.0949         | 0.0521       | 0.0402          | 0.0362         | 0.0019       | 0.0133          |
| f2       | 0.0493    | 0.0050 | 0.0410   | 0.0497 | 0.0584    | 0.0242   | 0.0122 | 0.0152    | 0.0349   | 0.0071 | 0.0097    | 0.0548         | 0.0068       | 0.0061          | 0.0478         | 0.0018       | 0.0005          | 0.0709         | 0.0207       | 0.0200          | 0.0474         | 0.0001       | 0.0022          | 0.0730         | 0.0198       | 0.0202          | 0.0519         | 0.0049       | 0.0027          |
| h2o      | 0.4953    | 0.0052 | 0.0973   | 0.0978 | 0.0945    | 0.0623   | 0.0566 | 0.0525    | 0.0335   | 0.0269 | 0.0220    | 0.0486         | 0.0404       | 0.0358          | 0.0143         | 0.0070       | 0.0015          | 0.0446         | 0.0360       | 0.0314          | 0.0147         | 0.0072       | 0.0018          | 0.0441         | 0.0348       | 0.0301          | 0.0098         | 0.0023       | 0.0033          |
| h2s      | 0.4458    | 0.0052 | 0.1828   | 0.1952 | 0.1940    | 0.0275   | 0.0293 | 0.0281    | 0.0110   | 0.0162 | 0.0142    | 0.1143         | 0.1220       | 0.1198          | 0.0042         | 0.0034       | 0.0009          | 0.1456         | 0.1544       | 0.1522          | 0.0037         | 0.0046       | 0.0022          | 0.1497         | 0.1600       | 0.1573          | 0.0086         | 0.0004       | 0.0031          |
| hcl      | 0.2615    | 0.0019 | 0.0820   | 0.0923 | 0.0896    | 0.0102   | 0.0034 | 0.0076    | 0.0047   | 0.0003 | 0.0045    | 0.0483         | 0.0430       | 0.0478          | 0.0011         | 0.0049       | 0.0003          | 0.0623         | 0.0572       | 0.0621          | 0.0010         | 0.0043       | 0.0008          | 0.0641         | 0.0594       | 0.0646          | 0.0030         | 0.0064       | 0.0011          |
| hf       | 0.2375    | 0.0020 | 0.0393   | 0.0402 | 0.0378    | 0.0223   | 0.0233 | 0.0188    | 0.0115   | 0.0130 | 0.0076    | 0.0157         | 0.0166       | 0.0113          | 0.0045         | 0.0065       | 0.0004          | 0.0137         | 0.0147       | 0.0093          | 0.0047         | 0.0068       | 0.0008          | 0.0135         | 0.0144       | 0.0087          | 0.0030         | 0.0051       | 0.0012          |
| n2       | 1.1430    | 0.0146 | 0.5022   | 0.4963 | 0.4836    | 0.2373   | 0.1886 | 0.1858    | 0.1316   | 0.0739 | 0.0731    | 0.1392         | 0.0724       | 0.0737          | 0.0687         | 0.0044       | 0.0052          | 0.1186         | 0.0486       | 0.0499          | 0.0700         | 0.0037       | 0.0042          | 0.1160         | 0.0413       | 0.0444          | 0.0553         | 0.0106       | 0.0094          |
| nh3      | 0.8139    | 0.0099 | 0.2112   | 0.2098 | 0.2072    | 0.1146   | 0.0994 | 0.0988    | 0.0616   | 0.0434 | 0.0426    | 0.0750         | 0.0540       | 0.0542          | 0.0245         | 0.0041       | 0.0032          | 0.0610         | 0.0389       | 0.0391          | 0.0254         | 0.0043       | 0.0034          | 0.0591         | 0.0356       | 0.0362          | 0.0154         | 0.0055       | 0.0065          |
| cf       | 0.4542    | 0.0045 | 0.1243   | 0.1225 | 0.1151    | 0.0780   | 0.0662 | 0.0551    | 0.0474   | 0.0336 | 0.0220    | 0.0616         | 0.0456       | 0.0329          | 0.0289         | 0.0135       | 0.0015          | 0.0592         | 0.0424       | 0.0298          | 0.0293         | 0.0134       | 0.0015          | 0.0589         | 0.0410       | 0.0277          | 0.0248         | 0.0091       | 0.0030          |
| ch       | 0.2014    | 0.0024 | 0.0630   | 0.0597 | 0.0598    | 0.0363   | 0.0247 | 0.0253    | 0.0233   | 0.0104 | 0.0108    | 0.0255         | 0.0106       | 0.0113          | 0.0146         | 0.0006       | 0.0008          | 0.0221         | 0.0065       | 0.0073          | 0.0148         | 0.0004       | 0.0007          | 0.0216         | 0.0052       | 0.0060          | 0.0125         | 0.0018       | 0.0016          |
| ch3      | 1.1457    | 0.0160 | 0.4735   | 0.4724 | 0.4736    | 0.1511   | 0.1445 | 0.1483    | 0.0687   | 0.0604 | 0.0648    | 0.0157         | 0.0067       | 0.0116          | 0.0094         | 0.0001       | 0.0047          | 0.0364         | 0.0459       | 0.0409          | 0.0109         | 0.0010       | 0.0057          | 0.0432         | 0.0533       | 0.0479          | 0.0054         | 0.0152       | 0.0104          |
| cn       | 1.4262    | 0.0237 | 0.7158   | 0.6987 | 0.6748    | 0.3118   | 0.2543 | 0.2354    | 0.1838   | 0.1197 | 0.1017    | 0.1474         | 0.0729       | 0.0561          | 0.0938         | 0.0249       | 0.0076          | 0.0913         | 0.0137       | 0.0032          | 0.0960         | 0.0255       | 0.0081          | 0.0839         | 0.0020       | 0.0140          | 0.0717         | 0.0015       | 0.0156          |
| hs       | 0.2239    | 0.0031 | 0.0743   | 0.0814 | 0.0821    | 0.0190   | 0.0207 | 0.0194    | 0.0078   | 0.0108 | 0.0094    | 0.0573         | 0.0626       | 0.0611          | 0.0020         | 0.0020       | 0.0006          | 0.0708         | 0.0768       | 0.0752          | 0.0018         | 0.0026       | 0.0012          | 0.0725         | 0.0795       | 0.0778          | 0.0048         | 0.0005       | 0.0019          |

| System   | REFERENCE | RANGE      | SD(T)/DZ | SDT/DZ | SDT(Q)/DZ | SD(T)/TZ | SDT/TZ | SDT(Q)/TZ | SD(T)/QZ | SDT/QZ | SDT(Q)/QZ | SD(T)/e1{D,T}Z | SDT/e1{D,T}Z | SDT(Q)/e1{D,T}Z | SD(T)/e1{T,Q}Z | SDT/e1{T,Q}Z | SDT(Q)/e1{T,Q}Z | SD(T)/e2{D,T}Z | SDT/e2{D,T}Z | SDT(Q)/e2{D,T}Z | SD(T)/e2{T,Q}Z | SDT/e2{T,Q}Z | SDT(Q)/e2{T,Q}Z | SD(T)/e3{D,T}Z | SDT/e3{D,T}Z | SDT(Q)/e3{D,T}Z | SD(T)/e3{T,Q}Z | SDT/e3{T,Q}Z | SDT(Q)/e3{T,Q}Z |
|----------|-----------|------------|----------|--------|-----------|----------|--------|-----------|----------|--------|-----------|----------------|--------------|-----------------|----------------|--------------|-----------------|----------------|--------------|-----------------|----------------|--------------|-----------------|----------------|--------------|-----------------|----------------|--------------|-----------------|
| nh2      | 0.4436    | 0.0049     | 0.0818   | 0.0813 | 0.0798    | 0.0612   | 0.0514 | 0.0509    | 0.0339   | 0.0224 | 0.0215    | 0.0534         | 0.0397       | 0.0396          | 0.0154         | 0.0027       | 0.0016          | 0.0515         | 0.0371       | 0.0370          | 0.0158         | 0.0027       | 0.0016          | 0.0512         | 0.0358       | 0.0359          | 0.0110         | 0.0020       | 0.0032          |
| no       | 0.6905    | 0.0061     | 0.1795   | 0.1824 | 0.1682    | 0.1212   | 0.0944 | 0.0840    | 0.0751   | 0.0418 | 0.0322    | 0.1034         | 0.0640       | 0.0552          | 0.0494         | 0.0114       | 0.0024          | 0.1053         | 0.0636       | 0.0548          | 0.0499         | 0.0105       | 0.0013          | 0.1055         | 0.0606       | 0.0526          | 0.0443         | 0.0052       | 0.0037          |
| oh       | 0.2107    | 0.0018     | 0.0232   | 0.0236 | 0.0221    | 0.0236   | 0.0215 | 0.0191    | 0.0131   | 0.0108 | 0.0078    | 0.0242         | 0.0210       | 0.0183          | 0.0065         | 0.0040       | 0.0005          | 0.0250         | 0.0216       | 0.0189          | 0.0066         | 0.0041       | 0.0007          | 0.0251         | 0.0215       | 0.0186          | 0.0050         | 0.0025       | 0.0012          |
| sih      | 0.0489    | 0.0006     | 0.1019   | 0.0991 | 0.1031    | 0.0175   | 0.0042 | 0.0047    | 0.0147   | 0.0087 | 0.0019    | 0.0169         | 0.0466       | 0.0356          | 0.0131         | 0.0116       | 0.0003          | 0.0289         | 0.0600       | 0.0490          | 0.0131         | 0.0120       | 0.0003          | 0.0304         | 0.0636       | 0.0517          | 0.0127         | 0.0122       | 0.0000          |
| ch2-trip | 0.8625    | 0.0133     | 0.4072   | 0.4076 | 0.4096    | 0.1182   | 0.1167 | 0.1204    | 0.0509   | 0.0487 | 0.0528    | 0.0035         | 0.0058       | 0.0014          | 0.0021         | 0.0006       | 0.0038          | 0.0507         | 0.0531       | 0.0487          | 0.0033         | 0.0004       | 0.0048          | 0.0568         | 0.0595       | 0.0547          | 0.0101         | 0.0130       | 0.0085          |
| nh       | 0.1737    | 0.0015     | 0.0098   | 0.0100 | 0.0093    | 0.0215   | 0.0170 | 0.0168    | 0.0127   | 0.0075 | 0.0069    | 0.0268         | 0.0204       | 0.0203          | 0.0070         | 0.0013       | 0.0005          | 0.0292         | 0.0225       | 0.0224          | 0.0071         | 0.0012       | 0.0005          | 0.0295         | 0.0223       | 0.0223          | 0.0057         | 0.0002       | 0.0010          |
| o2       | 0.4139    | 0.0018     | 0.0614   | 0.0598 | 0.0524    | 0.0697   | 0.0347 | 0.0360    | 0.0515   | 0.0095 | 0.0125    | 0.0812         | 0.0321       | 0.0371          | 0.0441         | 0.0029       | 0.0012          | 0.0963         | 0.0446       | 0.0496          | 0.0442         | 0.0044       | 0.0005          | 0.0982         | 0.0429       | 0.0495          | 0.0433         | 0.0050       | 0.0006          |
|          |           | <b>MAX</b> | 0.7185   | 0.7174 | 0.7222    | 0.3118   | 0.2543 | 0.2354    | 0.1838   | 0.1197 | 0.1017    | 0.1474         | 0.1220       | 0.1198          | 0.0938         | 0.0249       | 0.0076          | 0.1456         | 0.1544       | 0.1522          | 0.0960         | 0.0255       | 0.0081          | 0.1497         | 0.1600       | 0.1573          | 0.0717         | 0.0218       | 0.0156          |
|          |           | <b>MAD</b> | 0.2312   | 0.2298 | 0.2269    | 0.0961   | 0.0807 | 0.0791    | 0.0531   | 0.0353 | 0.0336    | 0.0591         | 0.0424       | 0.0384          | 0.0247         | 0.0063       | 0.0024          | 0.0619         | 0.0469       | 0.0427          | 0.0253         | 0.0064       | 0.0027          | 0.0626         | 0.0468       | 0.0436          | 0.0211         | 0.0064       | 0.0051          |
|          |           | <b>RMS</b> | 0.3166   | 0.3136 | 0.3096    | 0.1276   | 0.1100 | 0.1068    | 0.0695   | 0.0482 | 0.0452    | 0.0730         | 0.0522       | 0.0482          | 0.0342         | 0.0089       | 0.0033          | 0.0722         | 0.0577       | 0.0542          | 0.0349         | 0.0090       | 0.0036          | 0.0730         | 0.0593       | 0.0559          | 0.0283         | 0.0086       | 0.0069          |
|          |           | <b>SD</b>  | 0.2208   | 0.2178 | 0.2150    | 0.0856   | 0.0763 | 0.0733    | 0.0458   | 0.0335 | 0.0309    | 0.0438         | 0.0311       | 0.0297          | 0.0241         | 0.0063       | 0.0022          | 0.0380         | 0.0344       | 0.0341          | 0.0245         | 0.0065       | 0.0024          | 0.0383         | 0.0372       | 0.0358          | 0.0192         | 0.0059       | 0.0047          |

Table S13. Differences between absolute deviations obtained at given levels of theory in kcal mol<sup>-1</sup>. The geometries were optimized as indicated in the header of Table S12. Reference values are computed as the mean of SDT(Q)/eN{T,Q}Z (N = 1 – 3) values. Positive values are highlighted in red. Maximum (MAX), mean (MAD), root mean square (RMS), and standard deviation (SD) are provided at the bottom of the Table.

| System   | $\frac{\text{SDT/DZ}}{\text{SD(T)/TZ}}$ | $\frac{\text{SDT(Q)/DZ}}{\text{SD(T)/TZ}}$ | $\frac{\text{SDT/TZ}}{\text{SD(T)/QZ}}$ | $\frac{\text{SDT(Q)/TZ}}{\text{SD(T)/QZ}}$ | $\frac{\text{SDT/e1\{D,T\}Z}}{\text{SD(T)/e1\{T,Q\}Z}}$ | $\frac{\text{SDT(Q)/e1\{D,T\}Z}}{\text{SD(T)/e1\{T,Q\}Z}}$ | $\frac{\text{SDT/e2\{D,T\}Z}}{\text{SD(T)/e2\{T,Q\}Z}}$ | $\frac{\text{SDT(Q)/e2\{D,T\}Z}}{\text{SD(T)/e2\{T,Q\}Z}}$ | $\frac{\text{SDT/e3\{D,T\}Z}}{\text{SD(T)/e3\{T,Q\}Z}}$ | $\frac{\text{SDT(Q)/e3\{D,T\}Z}}{\text{SD(T)/e3\{T,Q\}Z}}$ |
|----------|-----------------------------------------|--------------------------------------------|-----------------------------------------|--------------------------------------------|---------------------------------------------------------|------------------------------------------------------------|---------------------------------------------------------|------------------------------------------------------------|---------------------------------------------------------|------------------------------------------------------------|
| alh      | 0.1105                                  | 0.1423                                     | -0.0007                                 | 0.0407                                     | 0.0064                                                  | -0.0067                                                    | 0.0268                                                  | 0.0142                                                     | 0.0361                                                  | 0.0118                                                     |
| bf       | 0.2486                                  | 0.2596                                     | 0.0906                                  | 0.1023                                     | 0.0562                                                  | 0.0691                                                     | 0.0207                                                  | 0.0343                                                     | 0.0342                                                  | 0.0368                                                     |
| bh       | 0.0945                                  | 0.1086                                     | 0.0081                                  | 0.0246                                     | -0.0072                                                 | 0.0036                                                     | 0.0078                                                  | 0.0189                                                     | 0.0146                                                  | 0.0177                                                     |
| bh3      | 0.5313                                  | 0.5385                                     | 0.1029                                  | 0.1136                                     | 0.0379                                                  | 0.0317                                                     | 0.1230                                                  | 0.1203                                                     | 0.1231                                                  | 0.1099                                                     |
| ch2-sing | 0.0862                                  | 0.1194                                     | 0.0010                                  | 0.0387                                     | -0.0242                                                 | 0.0165                                                     | -0.0408                                                 | 0.0008                                                     | -0.0371                                                 | -0.0030                                                    |
| co       | 0.3204                                  | 0.3352                                     | 0.0971                                  | 0.1180                                     | 0.0419                                                  | 0.0670                                                     | 0.0026                                                  | 0.0289                                                     | 0.0159                                                  | 0.0383                                                     |
| f2       | 0.0255                                  | 0.0463                                     | -0.0227                                 | 0.0082                                     | -0.0410                                                 | 0.0043                                                     | -0.0266                                                 | 0.0200                                                     | -0.0321                                                 | 0.0153                                                     |
| h2o      | 0.0355                                  | 0.0379                                     | 0.0231                                  | 0.0256                                     | 0.0261                                                  | 0.0288                                                     | 0.0212                                                  | 0.0242                                                     | 0.0251                                                  | 0.0278                                                     |
| h2s      | 0.1677                                  | 0.1646                                     | 0.0183                                  | 0.0119                                     | 0.1179                                                  | 0.1164                                                     | 0.1507                                                  | 0.1476                                                     | 0.1515                                                  | 0.1569                                                     |
| hcl      | 0.0821                                  | 0.0862                                     | -0.0014                                 | 0.0072                                     | 0.0419                                                  | 0.0429                                                     | 0.0563                                                  | 0.0577                                                     | 0.0565                                                  | 0.0582                                                     |
| hf       | 0.0178                                  | 0.0146                                     | 0.0118                                  | 0.0058                                     | 0.0121                                                  | 0.0047                                                     | 0.0100                                                  | 0.0025                                                     | 0.0114                                                  | 0.0036                                                     |
| n2       | 0.2590                                  | 0.2950                                     | 0.0570                                  | 0.1119                                     | 0.0037                                                  | 0.0693                                                     | -0.0214                                                 | 0.0463                                                     | -0.0140                                                 | 0.0339                                                     |
| nh3      | 0.0952                                  | 0.1077                                     | 0.0379                                  | 0.0554                                     | 0.0295                                                  | 0.0501                                                     | 0.0136                                                  | 0.0348                                                     | 0.0202                                                  | 0.0307                                                     |
| cf       | 0.0445                                  | 0.0489                                     | 0.0188                                  | 0.0216                                     | 0.0167                                                  | 0.0194                                                     | 0.0132                                                  | 0.0164                                                     | 0.0162                                                  | 0.0186                                                     |
| ch       | 0.0234                                  | 0.0351                                     | 0.0014                                  | 0.0150                                     | -0.0040                                                 | 0.0108                                                     | -0.0083                                                 | 0.0068                                                     | -0.0073                                                 | 0.0042                                                     |
| ch3      | 0.3213                                  | 0.3291                                     | 0.0758                                  | 0.0879                                     | -0.0027                                                 | 0.0116                                                     | 0.0350                                                  | 0.0399                                                     | 0.0479                                                  | 0.0327                                                     |
| cn       | 0.3869                                  | 0.4205                                     | 0.0705                                  | 0.1156                                     | -0.0209                                                 | 0.0312                                                     | -0.0823                                                 | -0.0223                                                    | -0.0697                                                 | 0.0125                                                     |
| hs       | 0.0624                                  | 0.0614                                     | 0.0129                                  | 0.0086                                     | 0.0606                                                  | 0.0591                                                     | 0.0750                                                  | 0.0726                                                     | 0.0747                                                  | 0.0773                                                     |
| nh2      | 0.0201                                  | 0.0283                                     | 0.0176                                  | 0.0285                                     | 0.0243                                                  | 0.0369                                                     | 0.0212                                                  | 0.0343                                                     | 0.0248                                                  | 0.0339                                                     |
| no       | 0.0611                                  | 0.0739                                     | 0.0193                                  | 0.0422                                     | 0.0146                                                  | 0.0438                                                     | 0.0137                                                  | 0.0444                                                     | 0.0163                                                  | 0.0474                                                     |
| oh       | 0.0000                                  | 0.0006                                     | 0.0084                                  | 0.0084                                     | 0.0146                                                  | 0.0143                                                     | 0.0150                                                  | 0.0148                                                     | 0.0165                                                  | 0.0162                                                     |
| sih      | 0.0816                                  | 0.0989                                     | -0.0105                                 | -0.0040                                    | 0.0335                                                  | 0.0240                                                     | 0.0469                                                  | 0.0371                                                     | 0.0509                                                  | 0.0395                                                     |



| System          | $\frac{SDT/DZ}{-SD(T)/TZ}$ | $\frac{SDT(Q)/DZ}{-SDT/TZ}$ | $\frac{SDT/TZ}{-SD(T)/QZ}$ | $\frac{SDT(Q)/TZ}{-SDT/QZ}$ | $\frac{SDT/e1\{D,T\}Z}{-SD(T)/e1\{T,Q\}Z}$ | $\frac{SDT(Q)/e1\{D,T\}Z}{-SDT/e1\{T,Q\}Z}$ | $\frac{SDT/e2\{D,T\}Z}{-SD(T)/e2\{T,Q\}Z}$ | $\frac{SDT(Q)/e2\{D,T\}Z}{-SDT/e2\{T,Q\}Z}$ | $\frac{SDT/e3\{D,T\}Z}{-SD(T)/e3\{T,Q\}Z}$ | $\frac{SDT(Q)/e3\{D,T\}Z}{-SDT/e3\{T,Q\}Z}$ |
|-----------------|----------------------------|-----------------------------|----------------------------|-----------------------------|--------------------------------------------|---------------------------------------------|--------------------------------------------|---------------------------------------------|--------------------------------------------|---------------------------------------------|
| <b>ch2-trip</b> | 0.2895                     | 0.2930                      | 0.0658                     | 0.0717                      | 0.0037                                     | 0.0008                                      | 0.0498                                     | 0.0482                                      | 0.0493                                     | 0.0418                                      |
| <b>nh</b>       | -0.0115                    | -0.0077                     | 0.0044                     | 0.0093                      | 0.0133                                     | 0.0190                                      | 0.0153                                     | 0.0212                                      | 0.0166                                     | 0.0221                                      |
| <b>o2</b>       | -0.0099                    | 0.0177                      | -0.0168                    | 0.0264                      | -0.0120                                    | 0.0342                                      | 0.0004                                     | 0.0452                                      | -0.0004                                    | 0.0445                                      |
| <b>MAX</b>      | 0.4056                     | 0.4679                      | 0.0705                     | 0.1156                      | 0.0282                                     | 0.0949                                      | 0.0584                                     | 0.1267                                      | 0.0883                                     | 0.1355                                      |
| <b>MAD</b>      | 0.1337                     | 0.1462                      | 0.0276                     | 0.0438                      | 0.0177                                     | 0.0321                                      | 0.0215                                     | 0.0364                                      | 0.0256                                     | 0.0371                                      |
| <b>RMS</b>      | 0.1861                     | 0.1996                      | 0.0405                     | 0.0587                      | 0.0180                                     | 0.0394                                      | 0.0229                                     | 0.0452                                      | 0.0310                                     | 0.0473                                      |
| <b>SD</b>       | 0.1322                     | 0.1387                      | 0.0305                     | 0.0398                      | 0.0070                                     | 0.0234                                      | 0.0099                                     | 0.0275                                      | 0.0180                                     | 0.0299                                      |

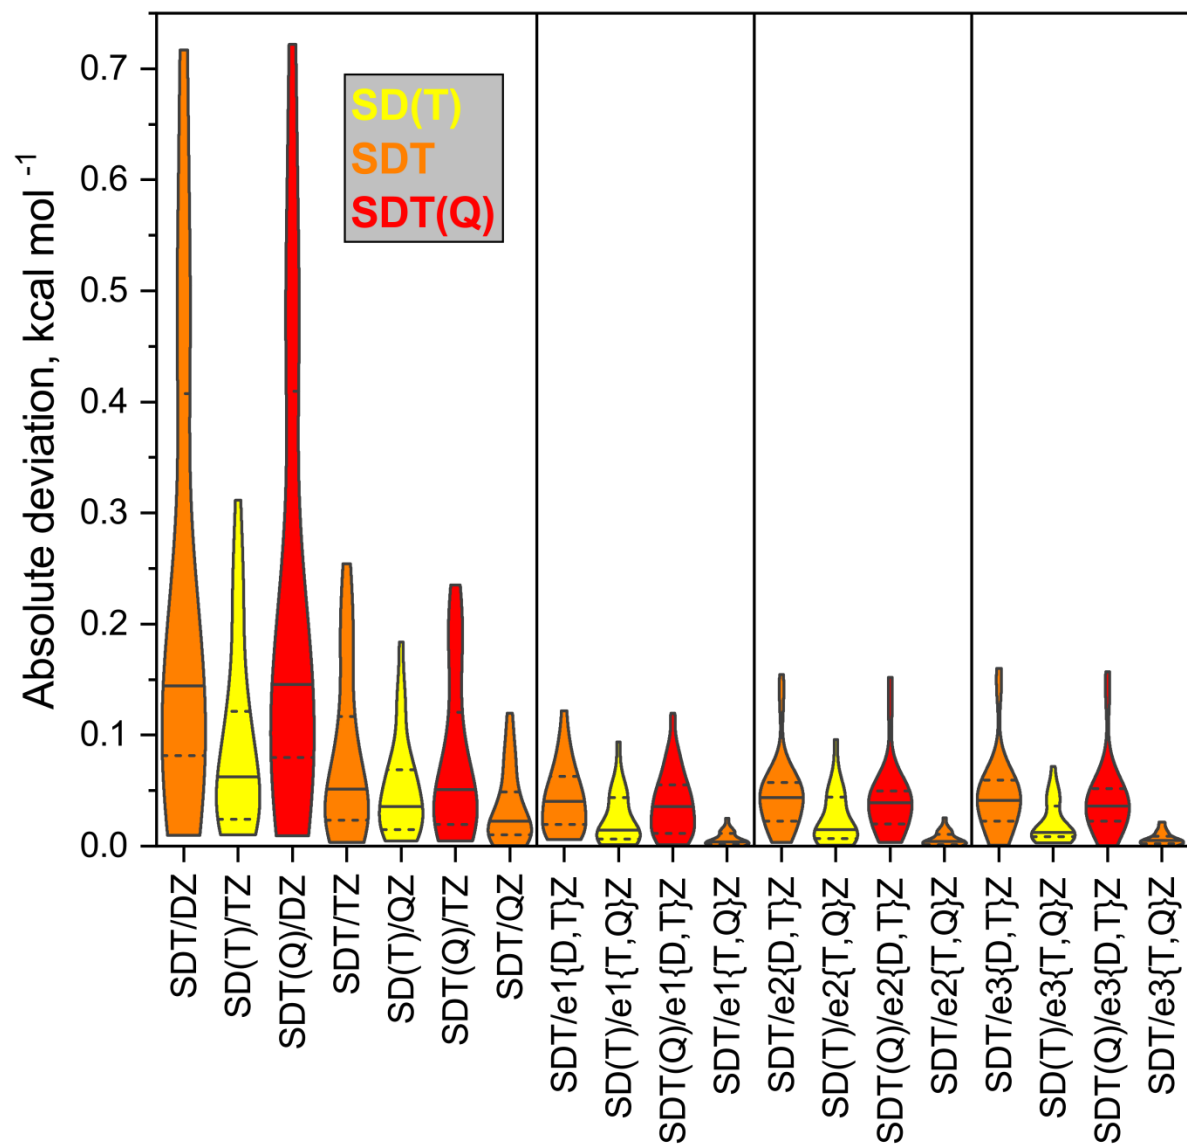

Figure S14. Violin plots of the absolute deviations obtained at a given level of theory. The geometries were optimized as indicated in the header of Table S12. Reference values are computed as the mean of  $\text{SDT(Q)/eN}\{\text{T,Q}\}\text{Z}$  ( $N = 1 - 3$ ) values. The median (solid), 25<sup>th</sup>, and 75<sup>th</sup> percentiles (dash) are shown. The highest point of a plot represents the maximum deviation.

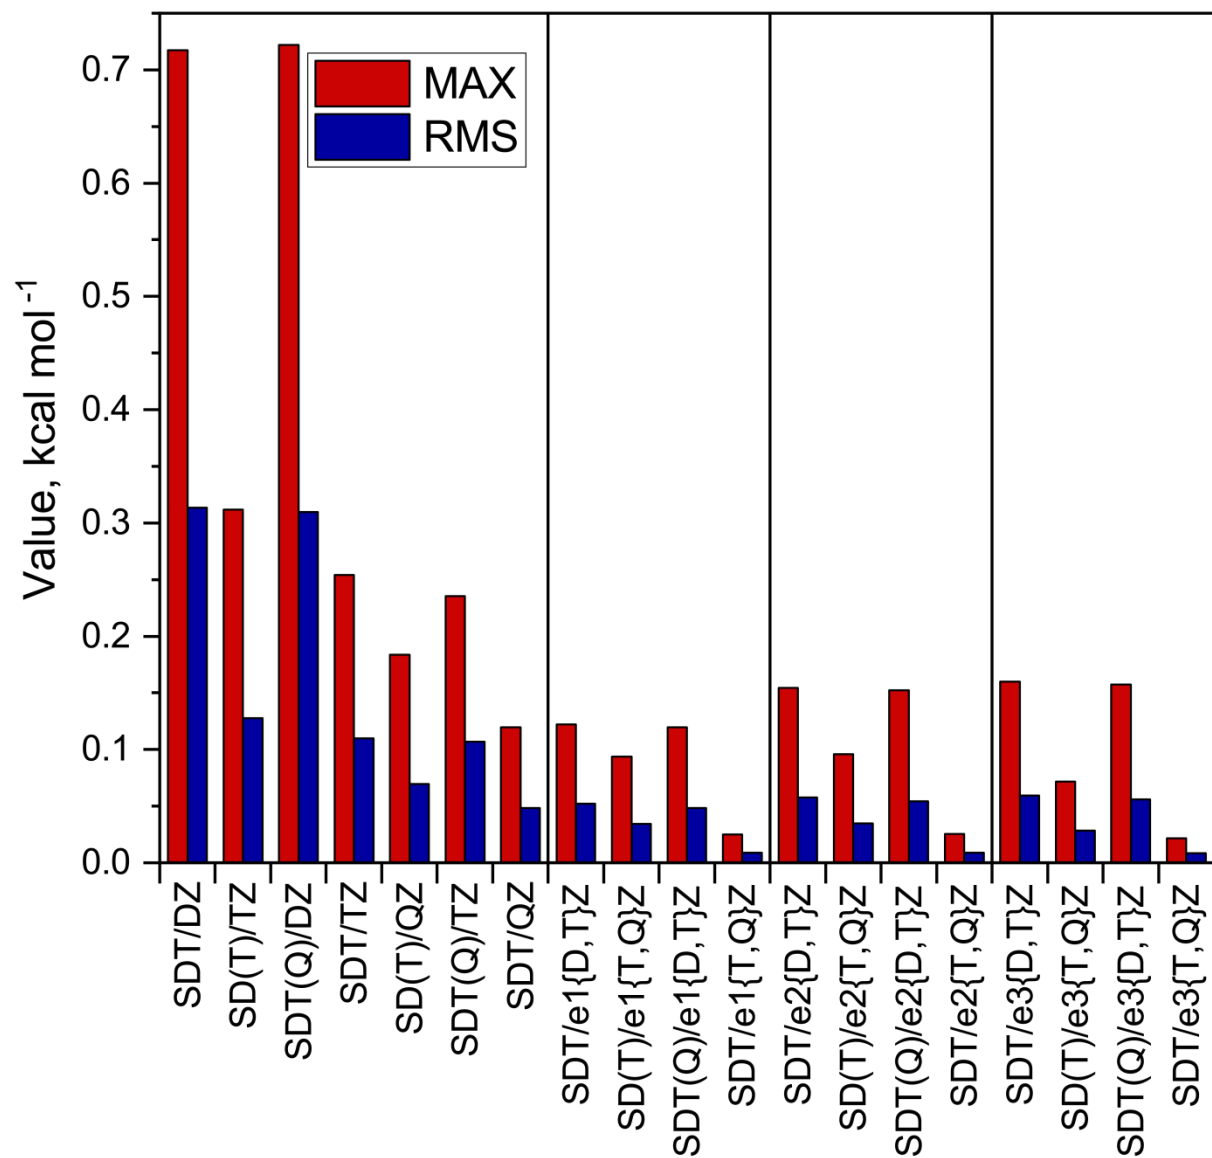

Figure S15. Maximum (MAX) and root mean square (RMS) values for the absolute deviations obtained at a given level of theory. The geometries were optimized as indicated in the header of Table S12. Reference values are computed as the mean of SDT(Q)/eN{T,Q}Z (N = 1 – 3) values.

*Geometry Data*

Table S14. Bond lengths for diatomic systems optimized using FC-SD(T)/nZ and FC-SDT/nZ methods, in Å.

| System       | Multiplicity | Basis set | $l_{\text{FC-SD(T)}}$ | $l_{\text{FC-SDT}}$ | Difference |
|--------------|--------------|-----------|-----------------------|---------------------|------------|
| <b>alh</b>   | 1            | DZ        | 1.65404               | 1.65461             | 0.00057    |
|              |              | TZ        | 1.64984               | 1.65029             | 0.00045    |
|              |              | QZ        | 1.64925               | 1.64925             | 0          |
| <b>co</b>    | 1            | DZ        | 1.14248               | 1.14263             | 0.00015    |
|              |              | TZ        | 1.13333               | 1.13320             | 0.00013    |
|              |              | QZ        | 1.13094               | 1.13075             | 0.00019    |
| <b>f2</b>    | 1            | DZ        | 1.45577               | 1.45577             | 0          |
|              |              | TZ        | 1.41448               | 1.41418             | 0.0003     |
|              |              | QZ        | 1.41259               | 1.41216             | 0.00043    |
| <b>hcl</b>   | 1            | DZ        | 1.28485               | 1.28497             | 0.00012    |
|              |              | TZ        | 1.27369               | 1.27369             | 0          |
|              |              | QZ        | 1.27514               | 1.27514             | 0          |
| <b>cf</b>    | 2            | DZ        | 1.29146               | 1.29249             | 0.00103    |
|              |              | TZ        | 1.27587               | 1.27648             | 0.00061    |
|              |              | QZ        | 1.27443               | 1.27494             | 0.00051    |
| <b>hs</b>    | 2            | DZ        | 1.35357               | 1.35382             | 0.00025    |
|              |              | TZ        | 1.34113               | 1.34132             | 0.00019    |
|              |              | QZ        | 1.34151               | 1.34170             | 0.00019    |
|              |              | 5Z        | 1.34163               | 1.34181             | 0.00018    |
| <b>no</b>    | 2            | DZ        | 1.15990               | 1.16462             | 0.00472    |
|              |              | TZ        | 1.15167               | 1.15499             | 0.00332    |
|              |              | QZ        | 1.14960               | 1.15245             | 0.00285    |
| <b>sih</b>   | 2            | DZ        | 1.53392               | 1.53439             | 0.00047    |
|              |              | TZ        | 1.52253               | 1.52290             | 0.00037    |
|              |              | QZ        | 1.52150               | 1.52184             | 0.00034    |
|              |              | 5Z        | 1.52166               | 1.52199             | 0.00033    |
| <b>bn3pi</b> | 3            | DZ        | 1.34281               | 1.34603             | 0.00322    |
|              |              | TZ        | 1.33125               | 1.33346             | 0.00221    |
|              |              | QZ        | 1.32747               | 1.32940             | 0.00193    |
| <b>nh</b>    | 3            | DZ        | 1.05548               | 1.05575             | 0.00027    |
|              |              | TZ        | 1.03858               | 1.03880             | 0.00022    |
|              |              | QZ        | 1.03724               | 1.03747             | 0.00023    |
|              |              | 5Z        | 1.03681               | 1.03702             | 0.00021    |

Table S15. Bond lengths for diatomic systems optimized using FC-SD(T)/nZ and CV-SD(T)/nZ methods, in Å.

| System     | Multiplicity | Basis set | $l_{\text{FC-SD(T)}}$ | $l_{\text{CV-SD(T)}}$ | Difference |
|------------|--------------|-----------|-----------------------|-----------------------|------------|
| <b>alh</b> | 1            | DZ        | 1.65404               | 1.65560               | 0.00156    |
|            |              | TZ        | 1.64984               | 1.64618               | 0.00366    |
|            |              | QZ        | 1.64925               | 1.64465               | 0.00460    |
| <b>bf</b>  | 1            | DZ        | 1.29297               | 1.29176               | 0.00121    |
|            |              | TZ        | 1.26822               | 1.26505               | 0.00317    |
|            |              | QZ        | 1.26658               | 1.26272               | 0.00386    |
| <b>bh</b>  | 1            | DZ        | 1.25398               | 1.25325               | 0.00073    |
|            |              | TZ        | 1.23448               | 1.23172               | 0.00276    |
|            |              | QZ        | 1.23305               | 1.22988               | 0.00317    |
| <b>co</b>  | 1            | DZ        | 1.14248               | 1.14175               | 0.00073    |
|            |              | TZ        | 1.13333               | 1.13136               | 0.00197    |
|            |              | QZ        | 1.13094               | 1.12860               | 0.00234    |
| <b>f2</b>  | 1            | DZ        | 1.45577               | 1.45497               | 0.00080    |
|            |              | TZ        | 1.41448               | 1.41326               | 0.00122    |
|            |              | QZ        | 1.41259               | 1.41121               | 0.00138    |
| <b>hcl</b> | 1            | DZ        | 1.28485               | 1.28448               | 0.00037    |
|            |              | TZ        | 1.27369               | 1.27226               | 0.00143    |
|            |              | QZ        | 1.27514               | 1.27334               | 0.00180    |
| <b>hf</b>  | 1            | DZ        | 0.91979               | 0.91945               | 0.00034    |
|            |              | TZ        | 0.91708               | 0.91658               | 0.00050    |
|            |              | QZ        | 0.91636               | 0.91579               | 0.00057    |
| <b>n2</b>  | 1            | DZ        | 1.11718               | 1.11658               | 0.00060    |
|            |              | TZ        | 1.10164               | 1.09994               | 0.00170    |
|            |              | QZ        | 1.09996               | 1.09794               | 0.00202    |
| <b>cf</b>  | 2            | DZ        | 1.29146               | 1.29033               | 0.00113    |
|            |              | TZ        | 1.27587               | 1.27341               | 0.00246    |
|            |              | QZ        | 1.27443               | 1.27152               | 0.00291    |
| <b>ch</b>  | 2            | DZ        | 1.14247               | 1.14173               | 0.00074    |
|            |              | TZ        | 1.12191               | 1.12027               | 0.00164    |
|            |              | QZ        | 1.12024               | 1.11835               | 0.00189    |

| <b>System</b> | <b>Multiplicity</b> | <b>Basis set</b> | <b>I<sub>FC-SD(T)</sub></b> | <b>I<sub>CV-SD(T)</sub></b> | <b>Difference</b> |
|---------------|---------------------|------------------|-----------------------------|-----------------------------|-------------------|
| <b>cn</b>     | 2                   | DZ               | 1.18812                     | 1.18735                     | 0.00077           |
|               |                     | TZ               | 1.17192                     | 1.16971                     | 0.00221           |
|               |                     | QZ               | 1.16969                     | 1.16710                     | 0.00259           |
| <b>hs</b>     | 2                   | DZ               | 1.35357                     | 1.35340                     | 0.00017           |
|               |                     | TZ               | 1.34113                     | 1.33935                     | 0.00178           |
|               |                     | QZ               | 1.34151                     | 1.33929                     | 0.00222           |
| <b>no</b>     | 2                   | DZ               | 1.15990                     | 1.15928                     | 0.00062           |
|               |                     | TZ               | 1.15167                     | 1.15028                     | 0.00139           |
|               |                     | QZ               | 1.14960                     | 1.14796                     | 0.00164           |
| <b>oh</b>     | 2                   | DZ               | 0.97937                     | 0.97888                     | 0.00049           |
|               |                     | TZ               | 0.97066                     | 0.96994                     | 0.00072           |
|               |                     | QZ               | 0.96972                     | 0.96889                     | 0.00083           |
| <b>sih</b>    | 2                   | DZ               | 1.53392                     | 1.53477                     | 0.00085           |
|               |                     | TZ               | 1.52253                     | 1.51973                     | 0.00280           |
|               |                     | QZ               | 1.52150                     | 1.51804                     | 0.00346           |
| <b>nh</b>     | 3                   | DZ               | 1.05548                     | 1.05483                     | 0.00065           |
|               |                     | TZ               | 1.03858                     | 1.03751                     | 0.00107           |
|               |                     | QZ               | 1.03724                     | 1.03602                     | 0.00122           |
| <b>o2</b>     | 3                   | DZ               | 1.21574                     | 1.21484                     | 0.00090           |
|               |                     | TZ               | 1.21143                     | 1.20973                     | 0.00170           |
|               |                     | QZ               | 1.20758                     | 1.20567                     | 0.00191           |

## Cartesian Coordinates of Optimized Structures

The data below are given in multiple XYZ-file format: the first line is the number of atoms (N), the second line is a comment presenting the system and level of theory for geometry optimization, and the following N lines contain atomic cartesian coordinates. Multiple structures are placed directly end-to-end.

```
2
alh FC-CCSD(T)/cc-pwCVDZ
  Al  0.0000000000000000    0.0000000000000000    -0.06146191349881
  H   0.0000000000000000    0.0000000000000000     1.59257872219881
2
alh FC-CCSD(T)/cc-pwCVQZ
  Al  0.0000000000000000    0.0000000000000000    -0.05906471174294
  H   0.0000000000000000    0.0000000000000000     1.59018152044294
2
alh FC-CCSD(T)/cc-pwCVTZ
  Al  0.0000000000000000    0.0000000000000000    -0.05936005525947
  H   0.0000000000000000    0.0000000000000000     1.59047686395947
2
alh CV-CCSD(T)/cc-pwCVDZ
  Al  0.0000000000000000    0.0000000000000000    -0.06224390942335
  H   0.0000000000000000    0.0000000000000000     1.59336071812335
2
alh CV-CCSD(T)/cc-pwCVQZ
  Al  0.0000000000000000    0.0000000000000000    -0.05676810369397
  H   0.0000000000000000    0.0000000000000000     1.58788491239397
2
alh CV-CCSD(T)/cc-pwCVTZ
  Al  0.0000000000000000    0.0000000000000000    -0.05753390679309
  H   0.0000000000000000    0.0000000000000000     1.58865071549309
2
bf FC-CCSD(T)/cc-pwCVDZ
  F   0.0000000000000000    0.0000000000000000    -0.47245947473382
  B   0.0000000000000000    0.0000000000000000     0.82050890613382
2
bf FC-CCSD(T)/cc-pwCVQZ
  F   0.0000000000000000    0.0000000000000000    -0.45926344550911
  B   0.0000000000000000    0.0000000000000000     0.80731287690911
2
bf FC-CCSD(T)/cc-pwCVTZ
  F   0.0000000000000000    0.0000000000000000    -0.46008381848103
  B   0.0000000000000000    0.0000000000000000     0.80813324988103
2
bf CV-CCSD(T)/cc-pwCVDZ
```

|                          |                    |                    |                   |
|--------------------------|--------------------|--------------------|-------------------|
| F                        | 0.0000000000000000 | 0.0000000000000000 | -0.47185345640309 |
| B                        | 0.0000000000000000 | 0.0000000000000000 | 0.81990288780309  |
| 2                        |                    |                    |                   |
| bf CV-CCSD(T)/cc-pwCVQZ  |                    |                    |                   |
| F                        | 0.0000000000000000 | 0.0000000000000000 | -0.45733700734489 |
| B                        | 0.0000000000000000 | 0.0000000000000000 | 0.80538643874489  |
| 2                        |                    |                    |                   |
| bf CV-CCSD(T)/cc-pwCVTZ  |                    |                    |                   |
| F                        | 0.0000000000000000 | 0.0000000000000000 | -0.45850225031811 |
| B                        | 0.0000000000000000 | 0.0000000000000000 | 0.80655168171811  |
| 2                        |                    |                    |                   |
| bh FC-CCSD(T)/cc-pwCVDZ  |                    |                    |                   |
| B                        | 0.0000000000000000 | 0.0000000000000000 | -0.11583293535711 |
| H                        | 0.0000000000000000 | 0.0000000000000000 | 1.13815195775711  |
| 2                        |                    |                    |                   |
| bh FC-CCSD(T)/cc-pwCVQZ  |                    |                    |                   |
| B                        | 0.0000000000000000 | 0.0000000000000000 | -0.10536544615304 |
| H                        | 0.0000000000000000 | 0.0000000000000000 | 1.12768446855304  |
| 2                        |                    |                    |                   |
| bh FC-CCSD(T)/cc-pwCVTZ  |                    |                    |                   |
| B                        | 0.0000000000000000 | 0.0000000000000000 | -0.10607821877459 |
| H                        | 0.0000000000000000 | 0.0000000000000000 | 1.12839724117459  |
| 2                        |                    |                    |                   |
| bh CV-CCSD(T)/cc-pwCVDZ  |                    |                    |                   |
| B                        | 0.0000000000000000 | 0.0000000000000000 | -0.11546299488672 |
| H                        | 0.0000000000000000 | 0.0000000000000000 | 1.13778201728672  |
| 2                        |                    |                    |                   |
| bh CV-CCSD(T)/cc-pwCVQZ  |                    |                    |                   |
| B                        | 0.0000000000000000 | 0.0000000000000000 | -0.10378177997868 |
| H                        | 0.0000000000000000 | 0.0000000000000000 | 1.12610080237868  |
| 2                        |                    |                    |                   |
| bh CV-CCSD(T)/cc-pwCVTZ  |                    |                    |                   |
| B                        | 0.0000000000000000 | 0.0000000000000000 | -0.10469805635353 |
| H                        | 0.0000000000000000 | 0.0000000000000000 | 1.12701707875353  |
| 4                        |                    |                    |                   |
| bh3 FC-CCSD(T)/cc-pwCVDZ |                    |                    |                   |
| B                        | -0.00000366427346  | -0.00000000000199  | 0.00000000215549  |
| H                        | 1.20599805442900   | 0.00000000000733   | -0.00000000071849 |
| H                        | -0.60299719508354  | -1.04442862693567  | -0.00000000071850 |
| H                        | -0.60299719507200  | 1.04442862693033   | -0.00000000071850 |
| 4                        |                    |                    |                   |
| bh3 FC-CCSD(T)/cc-pwCVQZ |                    |                    |                   |
| B                        | -0.00000334872482  | -0.00000000000383  | 0.00000000038431  |
| H                        | 1.18968328350717   | 0.00000000000829   | -0.00000000012810 |



|                          |                   |                   |                   |
|--------------------------|-------------------|-------------------|-------------------|
| H                        | -0.59483996739726 | -1.03029897327639 | -0.00000000012810 |
| H                        | -0.59483996738510 | 1.03029897327192  | -0.00000000012810 |
| 4                        |                   |                   |                   |
| bh3 FC-CCSD(T)/cc-pwCVTZ |                   |                   |                   |
| B                        | -0.00000334204855 | -0.00000000000067 | 0.00000000008718  |
| H                        | 1.19052165463050  | 0.00000000000235  | -0.0000000002906  |
| H                        | -0.59525915629282 | -1.03102501195480 | -0.0000000002906  |
| H                        | -0.59525915628914 | 1.03102501195312  | -0.0000000002906  |
| 4                        |                   |                   |                   |
| bh3 CV-CCSD(T)/cc-pwCVDZ |                   |                   |                   |
| B                        | -0.00000366433466 | -0.00000000000230 | 0.00000000251685  |
| H                        | 1.20542149583609  | 0.00000000000070  | -0.00000000083894 |
| H                        | -0.60270891575066 | -1.04392931577895 | -0.00000000083895 |
| H                        | -0.60270891575077 | 1.04392931578054  | -0.00000000083895 |
| 4                        |                   |                   |                   |
| bh3 CV-CCSD(T)/cc-pwCVQZ |                   |                   |                   |
| B                        | -0.00000334870035 | -0.00000000001568 | 0.00000000084409  |
| H                        | 1.18722074954800  | 0.00000000002646  | -0.00000000028136 |
| H                        | -0.59360870044221 | -1.02816635277820 | -0.00000000028136 |
| H                        | -0.59360870040544 | 1.02816635276742  | -0.00000000028136 |
| 4                        |                   |                   |                   |
| bh3 CV-CCSD(T)/cc-pwCVTZ |                   |                   |                   |
| B                        | -0.00000334405155 | 0.00000000000056  | 0.00000000099832  |
| H                        | 1.18840584274196  | 0.00000000000184  | -0.00000000033277 |
| H                        | -0.59420124934696 | -1.02919266541192 | -0.00000000033278 |
| H                        | -0.59420124934345 | 1.02919266540952  | -0.00000000033278 |
| 2                        |                   |                   |                   |
| cf FC-CCSD(T)/cc-pwCVDZ  |                   |                   |                   |
| C                        | 0.00000000000000  | 0.00000000000000  | -0.78930287112333 |
| F                        | 0.00000000000000  | 0.00000000000000  | 0.50215321862333  |
| 2                        |                   |                   |                   |
| cf FC-CCSD(T)/cc-pwCVQZ  |                   |                   |                   |
| C                        | 0.00000000000000  | 0.00000000000000  | -0.78078876022010 |
| F                        | 0.00000000000000  | 0.00000000000000  | 0.49363910772010  |
| 2                        |                   |                   |                   |
| cf FC-CCSD(T)/cc-pwCVTZ  |                   |                   |                   |
| C                        | 0.00000000000000  | 0.00000000000000  | -0.78150734554360 |
| F                        | 0.00000000000000  | 0.00000000000000  | 0.49435769304360  |
| 2                        |                   |                   |                   |
| cf CV-CCSD(T)/cc-pwCVDZ  |                   |                   |                   |
| C                        | 0.00000000000000  | 0.00000000000000  | -0.78874081028933 |
| F                        | 0.00000000000000  | 0.00000000000000  | 0.50159115778933  |
| 2                        |                   |                   |                   |
| cf CV-CCSD(T)/cc-pwCVQZ  |                   |                   |                   |

|                               |                    |                    |                   |
|-------------------------------|--------------------|--------------------|-------------------|
| C                             | 0.0000000000000000 | 0.0000000000000000 | -0.77933415798447 |
| F                             | 0.0000000000000000 | 0.0000000000000000 | 0.49218450548447  |
| 2                             |                    |                    |                   |
| cf CV-CCSD(T)/cc-pwCVTZ       |                    |                    |                   |
| C                             | 0.0000000000000000 | 0.0000000000000000 | -0.78027989841505 |
| F                             | 0.0000000000000000 | 0.0000000000000000 | 0.49313024591505  |
| 2                             |                    |                    |                   |
| ch FC-CCSD(T)/cc-pwCVDZ       |                    |                    |                   |
| C                             | 0.0000000000000000 | 0.0000000000000000 | -0.09809531062832 |
| H                             | 0.0000000000000000 | 0.0000000000000000 | 1.04437418182832  |
| 2                             |                    |                    |                   |
| ch FC-CCSD(T)/cc-pwCVQZ       |                    |                    |                   |
| C                             | 0.0000000000000000 | 0.0000000000000000 | -0.08697876087016 |
| H                             | 0.0000000000000000 | 0.0000000000000000 | 1.03325763207016  |
| 2                             |                    |                    |                   |
| ch FC-CCSD(T)/cc-pwCVTZ       |                    |                    |                   |
| C                             | 0.0000000000000000 | 0.0000000000000000 | -0.08781716738135 |
| H                             | 0.0000000000000000 | 0.0000000000000000 | 1.03409603858135  |
| 2                             |                    |                    |                   |
| ch CV-CCSD(T)/cc-pwCVDZ       |                    |                    |                   |
| C                             | 0.0000000000000000 | 0.0000000000000000 | -0.09772780410847 |
| H                             | 0.0000000000000000 | 0.0000000000000000 | 1.04400667530847  |
| 2                             |                    |                    |                   |
| ch CV-CCSD(T)/cc-pwCVQZ       |                    |                    |                   |
| C                             | 0.0000000000000000 | 0.0000000000000000 | -0.08603362863220 |
| H                             | 0.0000000000000000 | 0.0000000000000000 | 1.03231249983220  |
| 2                             |                    |                    |                   |
| ch CV-CCSD(T)/cc-pwCVTZ       |                    |                    |                   |
| C                             | 0.0000000000000000 | 0.0000000000000000 | -0.08699529541127 |
| H                             | 0.0000000000000000 | 0.0000000000000000 | 1.03327416661127  |
| 3                             |                    |                    |                   |
| ch2-sing FC-CCSD(T)/cc-pwCVDZ |                    |                    |                   |
| C                             | 0.0000000000000000 | -0.000000000000426 | -0.11633714036968 |
| H                             | 0.0000000000000000 | 0.86794234511250   | 0.60485472013665  |
| H                             | 0.0000000000000000 | -0.86794234510824  | 0.60485472013303  |
| 3                             |                    |                    |                   |
| ch2-sing FC-CCSD(T)/cc-pwCVQZ |                    |                    |                   |
| C                             | 0.0000000000000000 | 0.000000000000895  | -0.10112507836720 |
| H                             | 0.0000000000000000 | 0.86094357227052   | 0.59724868913000  |
| H                             | 0.0000000000000000 | -0.86094357227947  | 0.59724868913721  |
| 3                             |                    |                    |                   |
| ch2-sing FC-CCSD(T)/cc-pwCVTZ |                    |                    |                   |
| C                             | 0.0000000000000000 | 0.000000000000298  | -0.10301459124230 |
| H                             | 0.0000000000000000 | 0.86039471918268   | 0.59819344556990  |

|   |                               |                    |                   |
|---|-------------------------------|--------------------|-------------------|
| H | 0.0000000000000000            | -0.86039471918566  | 0.59819344557240  |
| 3 | ch2-sing CV-CCSD(T)/cc-pwCVDZ |                    |                   |
| C | 0.0000000000000000            | -0.000000000000498 | -0.11571269169942 |
| H | 0.0000000000000000            | 0.86769807925977   | 0.60454249580181  |
| H | 0.0000000000000000            | -0.86769807925479  | 0.60454249579761  |
| 3 | ch2-sing CV-CCSD(T)/cc-pwCVQZ |                    |                   |
| C | 0.0000000000000000            | 0.000000000000384  | -0.09961909023104 |
| H | 0.0000000000000000            | 0.86029316222501   | 0.59649569506397  |
| H | 0.0000000000000000            | -0.86029316222884  | 0.59649569506707  |
| 3 | ch2-sing CV-CCSD(T)/cc-pwCVTZ |                    |                   |
| C | 0.0000000000000000            | 0.000000000000194  | -0.10167999305833 |
| H | 0.0000000000000000            | 0.85985138723209   | 0.59752614647839  |
| H | 0.0000000000000000            | -0.85985138723403  | 0.59752614647994  |
| 3 | ch2-trip FC-CCSD(T)/cc-pwCVDZ |                    |                   |
| C | 0.0000000000000000            | -0.000000000000292 | -0.07374721900459 |
| H | 0.0000000000000000            | 1.00103013072673   | 0.36894328900284  |
| H | 0.0000000000000000            | -1.00103013072381  | 0.36894328900175  |
| 3 | ch2-trip FC-CCSD(T)/cc-pwCVQZ |                    |                   |
| C | 0.0000000000000000            | -0.000000000001577 | -0.06118323269066 |
| H | 0.0000000000000000            | 0.99023955877414   | 0.36266129584870  |
| H | 0.0000000000000000            | -0.99023955875837  | 0.36266129584196  |
| 3 | ch2-trip FC-CCSD(T)/cc-pwCVTZ |                    |                   |
| C | 0.0000000000000000            | 0.000000000000736  | -0.06236430612219 |
| H | 0.0000000000000000            | 0.99034544920794   | 0.36325183255951  |
| H | 0.0000000000000000            | -0.99034544921530  | 0.36325183256267  |
| 3 | ch2-trip CV-CCSD(T)/cc-pwCVDZ |                    |                   |
| C | 0.0000000000000000            | -0.000000000000403 | -0.07309812018879 |
| H | 0.0000000000000000            | 1.00079141096506   | 0.36861873959528  |
| H | 0.0000000000000000            | -1.00079141096103  | 0.36861873959351  |
| 3 | ch2-trip CV-CCSD(T)/cc-pwCVQZ |                    |                   |
| C | 0.0000000000000000            | -0.000000000001142 | -0.05989610687288 |
| H | 0.0000000000000000            | 0.98939411327683   | 0.36201773293888  |
| H | 0.0000000000000000            | -0.98939411326541  | 0.36201773293399  |
| 3 | ch2-trip CV-CCSD(T)/cc-pwCVTZ |                    |                   |
| C | 0.0000000000000000            | -0.000000000001114 | -0.06120451634709 |

|     |                      |                    |                   |
|-----|----------------------|--------------------|-------------------|
| H   | 0.0000000000000000   | 0.98964716425939   | 0.36267193767594  |
| H   | 0.0000000000000000   | -0.98964716424824  | 0.36267193767115  |
| 4   |                      |                    |                   |
| ch3 | FC-CCSD(T)/cc-pwCVDZ |                    |                   |
| C   | -0.00000430033762    | 0.00000000004798   | 0.00000000028297  |
| H   | 1.09369511060876     | -0.00000000003495  | -0.00000000009432 |
| H   | -0.54684540516916    | -0.94717192084107  | -0.00000000009432 |
| H   | -0.54684540520199    | 0.94717192082803   | -0.00000000009432 |
| 4   |                      |                    |                   |
| ch3 | FC-CCSD(T)/cc-pwCVQZ |                    |                   |
| C   | -0.00000340416802    | 0.00000000002461   | 0.00000000021307  |
| H   | 1.07761108331161     | 0.00000000001733   | -0.00000000007102 |
| H   | -0.53880383964391    | -0.93324133430089  | -0.00000000007102 |
| H   | -0.53880383959969    | 0.93324133425895   | -0.00000000007102 |
| 4   |                      |                    |                   |
| ch3 | FC-CCSD(T)/cc-pwCVTZ |                    |                   |
| C   | -0.00000340898861    | -0.00000000002072  | 0.00000000018076  |
| H   | 1.07829472524295     | 0.00000000004332   | -0.00000000006025 |
| H   | -0.53914565820870    | -0.93383338750084  | -0.00000000006025 |
| H   | -0.53914565814564    | 0.93383338747824   | -0.00000000006025 |
| 4   |                      |                    |                   |
| ch3 | CV-CCSD(T)/cc-pwCVDZ |                    |                   |
| C   | -0.00000729088936    | 0.00000000002211   | 0.00000000031781  |
| H   | 1.09312453719766     | -0.00000000001248  | -0.00000000010594 |
| H   | -0.54655862319972    | -0.94668333537391  | -0.00000000010594 |
| H   | -0.54655862320858    | 0.94668333536428   | -0.00000000010594 |
| 4   |                      |                    |                   |
| ch3 | CV-CCSD(T)/cc-pwCVQZ |                    |                   |
| C   | -0.00000340272298    | -0.00000000003071  | -0.00000000008598 |
| H   | 1.07617237325152     | 0.00000000003379   | 0.00000000002866  |
| H   | -0.53808448533467    | -0.93199536934168  | 0.00000000002866  |
| H   | -0.53808448529388    | 0.93199536933861   | 0.00000000002866  |
| 4   |                      |                    |                   |
| ch3 | CV-CCSD(T)/cc-pwCVTZ |                    |                   |
| C   | -0.00000340862495    | 0.00000000004601   | -0.00000000038261 |
| H   | 1.07705680682805     | -0.00000000003836  | 0.00000000012753  |
| H   | -0.53852669913161    | -0.93276131524801  | 0.00000000012754  |
| H   | -0.53852669917149    | 0.93276131524036   | 0.00000000012754  |
| 2   |                      |                    |                   |
| cn  | FC-CCSD(T)/cc-pwCVDZ |                    |                   |
| C   | 0.0000000000000000   | 0.0000000000000000 | -0.63907023857934 |
| N   | 0.0000000000000000   | 0.0000000000000000 | 0.54904778757934  |
| 2   |                      |                    |                   |
| cn  | FC-CCSD(T)/cc-pwCVQZ |                    |                   |

|                         |                    |                    |                   |
|-------------------------|--------------------|--------------------|-------------------|
| C                       | 0.0000000000000000 | 0.0000000000000000 | -0.62985746689941 |
| N                       | 0.0000000000000000 | 0.0000000000000000 | 0.53983501589941  |
| 2                       |                    |                    |                   |
| cn FC-CCSD(T)/cc-pwCVTZ |                    |                    |                   |
| C                       | 0.0000000000000000 | 0.0000000000000000 | -0.63097267446294 |
| N                       | 0.0000000000000000 | 0.0000000000000000 | 0.54095022346294  |
| 2                       |                    |                    |                   |
| cn CV-CCSD(T)/cc-pwCVDZ |                    |                    |                   |
| C                       | 0.0000000000000000 | 0.0000000000000000 | -0.63868861453772 |
| N                       | 0.0000000000000000 | 0.0000000000000000 | 0.54866616353772  |
| 2                       |                    |                    |                   |
| cn CV-CCSD(T)/cc-pwCVQZ |                    |                    |                   |
| C                       | 0.0000000000000000 | 0.0000000000000000 | -0.62856135778943 |
| N                       | 0.0000000000000000 | 0.0000000000000000 | 0.53853890678943  |
| 2                       |                    |                    |                   |
| cn CV-CCSD(T)/cc-pwCVTZ |                    |                    |                   |
| C                       | 0.0000000000000000 | 0.0000000000000000 | -0.62986707781360 |
| N                       | 0.0000000000000000 | 0.0000000000000000 | 0.53984462681360  |
| 2                       |                    |                    |                   |
| co FC-CCSD(T)/cc-pwCVDZ |                    |                    |                   |
| C                       | 0.0000000000000000 | 0.0000000000000000 | -0.65173335913075 |
| O                       | 0.0000000000000000 | 0.0000000000000000 | 0.49074687473075  |
| 2                       |                    |                    |                   |
| co FC-CCSD(T)/cc-pwCVQZ |                    |                    |                   |
| C                       | 0.0000000000000000 | 0.0000000000000000 | -0.64596142695238 |
| O                       | 0.0000000000000000 | 0.0000000000000000 | 0.48497494255238  |
| 2                       |                    |                    |                   |
| co FC-CCSD(T)/cc-pwCVTZ |                    |                    |                   |
| C                       | 0.0000000000000000 | 0.0000000000000000 | -0.64715761095068 |
| O                       | 0.0000000000000000 | 0.0000000000000000 | 0.48617112655068  |
| 2                       |                    |                    |                   |
| co CV-CCSD(T)/cc-pwCVDZ |                    |                    |                   |
| C                       | 0.0000000000000000 | 0.0000000000000000 | -0.65136848604265 |
| O                       | 0.0000000000000000 | 0.0000000000000000 | 0.49038200164265  |
| 2                       |                    |                    |                   |
| co CV-CCSD(T)/cc-pwCVQZ |                    |                    |                   |
| C                       | 0.0000000000000000 | 0.0000000000000000 | -0.64479529581179 |
| O                       | 0.0000000000000000 | 0.0000000000000000 | 0.48380881141179  |
| 2                       |                    |                    |                   |
| co CV-CCSD(T)/cc-pwCVTZ |                    |                    |                   |
| C                       | 0.0000000000000000 | 0.0000000000000000 | -0.64617266797506 |
| O                       | 0.0000000000000000 | 0.0000000000000000 | 0.48518618357506  |
| 2                       |                    |                    |                   |
| f2 FC-CCSD(T)/cc-pwCVDZ |                    |                    |                   |

|     |                      |                    |                   |
|-----|----------------------|--------------------|-------------------|
| F   | 0.0000000000000000   | 0.0000000000000000 | -0.72788598451977 |
| F   | 0.0000000000000000   | 0.0000000000000000 | 0.72788598451977  |
| 2   |                      |                    |                   |
| f2  | FC-CCSD(T)/cc-pwCVQZ |                    |                   |
| F   | 0.0000000000000000   | 0.0000000000000000 | -0.70629713754918 |
| F   | 0.0000000000000000   | 0.0000000000000000 | 0.70629713754918  |
| 2   |                      |                    |                   |
| f2  | FC-CCSD(T)/cc-pwCVTZ |                    |                   |
| F   | 0.0000000000000000   | 0.0000000000000000 | -0.70724206541794 |
| F   | 0.0000000000000000   | 0.0000000000000000 | 0.70724206541794  |
| 2   |                      |                    |                   |
| f2  | CV-CCSD(T)/cc-pwCVDZ |                    |                   |
| F   | 0.0000000000000000   | 0.0000000000000000 | -0.72748499803160 |
| F   | 0.0000000000000000   | 0.0000000000000000 | 0.72748499803160  |
| 2   |                      |                    |                   |
| f2  | CV-CCSD(T)/cc-pwCVQZ |                    |                   |
| F   | 0.0000000000000000   | 0.0000000000000000 | -0.70560675618986 |
| F   | 0.0000000000000000   | 0.0000000000000000 | 0.70560675618986  |
| 2   |                      |                    |                   |
| f2  | CV-CCSD(T)/cc-pwCVTZ |                    |                   |
| F   | 0.0000000000000000   | 0.0000000000000000 | -0.70663142304156 |
| F   | 0.0000000000000000   | 0.0000000000000000 | 0.70663142304156  |
| 3   |                      |                    |                   |
| h2o | FC-CCSD(T)/cc-pwCVDZ |                    |                   |
| O   | 0.0000000000000000   | -0.000000000000554 | -0.08007605601922 |
| H   | 0.0000000000000000   | 0.75029964774694   | 0.52859183416192  |
| H   | 0.0000000000000000   | -0.75029964774140  | 0.52859183415730  |
| 3   |                      |                    |                   |
| h2o | FC-CCSD(T)/cc-pwCVQZ |                    |                   |
| O   | 0.0000000000000000   | 0.00000000001925   | -0.06699573847930 |
| H   | 0.0000000000000000   | 0.75548199922188   | 0.52205167538214  |
| H   | 0.0000000000000000   | -0.75548199924113  | 0.52205167539716  |
| 3   |                      |                    |                   |
| h2o | FC-CCSD(T)/cc-pwCVTZ |                    |                   |
| O   | 0.0000000000000000   | 0.00000000000939   | -0.06965969801190 |
| H   | 0.0000000000000000   | 0.75362575482512   | 0.52338365515225  |
| H   | 0.0000000000000000   | -0.75362575483451  | 0.52338365515965  |
| 3   |                      |                    |                   |
| h2o | CV-CCSD(T)/cc-pwCVDZ |                    |                   |
| O   | 0.0000000000000000   | -0.00000000000220  | -0.07955554641082 |
| H   | 0.0000000000000000   | 0.75025947939629   | 0.52833157935621  |
| H   | 0.0000000000000000   | -0.75025947939410  | 0.52833157935461  |
| 3   |                      |                    |                   |
| h2o | CV-CCSD(T)/cc-pwCVQZ |                    |                   |

|                          |                    |                   |                   |
|--------------------------|--------------------|-------------------|-------------------|
| O                        | 0.0000000000000000 | 0.00000000001377  | -0.06611159828956 |
| H                        | 0.0000000000000000 | 0.75539860219886  | 0.52160960528943  |
| H                        | 0.0000000000000000 | -0.75539860221263 | 0.52160960530014  |
| 3                        |                    |                   |                   |
| h2o CV-CCSD(T)/cc-pwCVTZ |                    |                   |                   |
| O                        | 0.0000000000000000 | 0.00000000000045  | -0.06886304874201 |
| H                        | 0.0000000000000000 | 0.75357572032949  | 0.52298533052086  |
| H                        | 0.0000000000000000 | -0.75357572032994 | 0.52298533052115  |
| 3                        |                    |                   |                   |
| h2s FC-CCSD(T)/cc-pwCVDZ |                    |                   |                   |
| S                        | 0.0000000000000000 | 0.00000000001295  | -0.05991153744251 |
| H                        | 0.0000000000000000 | 0.97151388672206  | 0.87401003881501  |
| H                        | 0.0000000000000000 | -0.97151388673501 | 0.87401003882749  |
| 3                        |                    |                   |                   |
| h2s FC-CCSD(T)/cc-pwCVQZ |                    |                   |                   |
| S                        | 0.0000000000000000 | 0.00000000007877  | -0.05467208400658 |
| H                        | 0.0000000000000000 | 0.96456789552453  | 0.87139031206548  |
| H                        | 0.0000000000000000 | -0.96456789560329 | 0.87139031214110  |
| 3                        |                    |                   |                   |
| h2s FC-CCSD(T)/cc-pwCVTZ |                    |                   |                   |
| S                        | 0.0000000000000000 | 0.00000000002510  | -0.05463017282005 |
| H                        | 0.0000000000000000 | 0.96364544195756  | 0.87136935649793  |
| H                        | 0.0000000000000000 | -0.96364544198266 | 0.87136935652211  |
| 3                        |                    |                   |                   |
| h2s CV-CCSD(T)/cc-pwCVDZ |                    |                   |                   |
| S                        | 0.0000000000000000 | 0.00000000001027  | -0.06011120275078 |
| H                        | 0.0000000000000000 | 0.97082393162312  | 0.87410987147051  |
| H                        | 0.0000000000000000 | -0.97082393163338 | 0.87410987148027  |
| 3                        |                    |                   |                   |
| h2s CV-CCSD(T)/cc-pwCVQZ |                    |                   |                   |
| S                        | 0.0000000000000000 | -0.00000000010085 | -0.05377528806361 |
| H                        | 0.0000000000000000 | 0.96266201575315  | 0.87094191418024  |
| H                        | 0.0000000000000000 | -0.96266201565230 | 0.87094191408337  |
| 3                        |                    |                   |                   |
| h2s CV-CCSD(T)/cc-pwCVTZ |                    |                   |                   |
| S                        | 0.0000000000000000 | -0.00000000003957 | -0.05397009224991 |
| H                        | 0.0000000000000000 | 0.96199598695877  | 0.87103931624397  |
| H                        | 0.0000000000000000 | -0.96199598691920 | 0.87103931620593  |
| 2                        |                    |                   |                   |
| hcl FC-CCSD(T)/cc-pwCVDZ |                    |                   |                   |
| Cl                       | 0.0000000000000000 | 0.00000000000000  | -0.03970503817190 |
| H                        | 0.0000000000000000 | 0.00000000000000  | 1.24514778017190  |
| 2                        |                    |                   |                   |
| hcl FC-CCSD(T)/cc-pwCVQZ |                    |                   |                   |

|     |                      |                    |                   |
|-----|----------------------|--------------------|-------------------|
| C1  | 0.0000000000000000   | 0.0000000000000000 | -0.03484957649777 |
| H   | 0.0000000000000000   | 0.0000000000000000 | 1.24029231849777  |
| 2   |                      |                    |                   |
| hcl | FC-CCSD(T)/cc-pwCVTZ |                    |                   |
| C1  | 0.0000000000000000   | 0.0000000000000000 | -0.03412427511101 |
| H   | 0.0000000000000000   | 0.0000000000000000 | 1.23956701711101  |
| 2   |                      |                    |                   |
| hcl | CV-CCSD(T)/cc-pwCVDZ |                    |                   |
| C1  | 0.0000000000000000   | 0.0000000000000000 | -0.03951963742323 |
| H   | 0.0000000000000000   | 0.0000000000000000 | 1.24496237942323  |
| 2   |                      |                    |                   |
| hcl | CV-CCSD(T)/cc-pwCVQZ |                    |                   |
| C1  | 0.0000000000000000   | 0.0000000000000000 | -0.03394782855197 |
| H   | 0.0000000000000000   | 0.0000000000000000 | 1.23939057055197  |
| 2   |                      |                    |                   |
| hcl | CV-CCSD(T)/cc-pwCVTZ |                    |                   |
| C1  | 0.0000000000000000   | 0.0000000000000000 | -0.03340773365122 |
| H   | 0.0000000000000000   | 0.0000000000000000 | 1.23885047565122  |
| 2   |                      |                    |                   |
| hf  | FC-CCSD(T)/cc-pwCVDZ |                    |                   |
| F   | 0.0000000000000000   | 0.0000000000000000 | -0.04746242250823 |
| H   | 0.0000000000000000   | 0.0000000000000000 | 0.87232813900823  |
| 2   |                      |                    |                   |
| hf  | FC-CCSD(T)/cc-pwCVQZ |                    |                   |
| F   | 0.0000000000000000   | 0.0000000000000000 | -0.04574671716658 |
| H   | 0.0000000000000000   | 0.0000000000000000 | 0.87061243366658  |
| 2   |                      |                    |                   |
| hf  | FC-CCSD(T)/cc-pwCVTZ |                    |                   |
| F   | 0.0000000000000000   | 0.0000000000000000 | -0.04610566435226 |
| H   | 0.0000000000000000   | 0.0000000000000000 | 0.87097138085226  |
| 2   |                      |                    |                   |
| hf  | CV-CCSD(T)/cc-pwCVDZ |                    |                   |
| F   | 0.0000000000000000   | 0.0000000000000000 | -0.04729214817865 |
| H   | 0.0000000000000000   | 0.0000000000000000 | 0.87215786467865  |
| 2   |                      |                    |                   |
| hf  | CV-CCSD(T)/cc-pwCVQZ |                    |                   |
| F   | 0.0000000000000000   | 0.0000000000000000 | -0.04546061657295 |
| H   | 0.0000000000000000   | 0.0000000000000000 | 0.87032633307295  |
| 2   |                      |                    |                   |
| hf  | CV-CCSD(T)/cc-pwCVTZ |                    |                   |
| F   | 0.0000000000000000   | 0.0000000000000000 | -0.04585622807206 |
| H   | 0.0000000000000000   | 0.0000000000000000 | 0.87072194457206  |
| 2   |                      |                    |                   |
| hs  | FC-CCSD(T)/cc-pwCVDZ |                    |                   |



|                         |                    |                    |                   |
|-------------------------|--------------------|--------------------|-------------------|
| S                       | 0.0000000000000000 | 0.0000000000000000 | -0.04667602170638 |
| H                       | 0.0000000000000000 | 0.0000000000000000 | 1.30688984090638  |
| 2                       |                    |                    |                   |
| hs FC-CCSD(T)/cc-pwCVQZ |                    |                    |                   |
| S                       | 0.0000000000000000 | 0.0000000000000000 | -0.04064722786311 |
| H                       | 0.0000000000000000 | 0.0000000000000000 | 1.30086104706311  |
| 2                       |                    |                    |                   |
| hs FC-CCSD(T)/cc-pwCVTZ |                    |                    |                   |
| S                       | 0.0000000000000000 | 0.0000000000000000 | -0.04045847296413 |
| H                       | 0.0000000000000000 | 0.0000000000000000 | 1.30067229216413  |
| 2                       |                    |                    |                   |
| hs CV-CCSD(T)/cc-pwCVDZ |                    |                    |                   |
| S                       | 0.0000000000000000 | 0.0000000000000000 | -0.04659249217379 |
| H                       | 0.0000000000000000 | 0.0000000000000000 | 1.30680631137379  |
| 2                       |                    |                    |                   |
| hs CV-CCSD(T)/cc-pwCVQZ |                    |                    |                   |
| S                       | 0.0000000000000000 | 0.0000000000000000 | -0.03953963900988 |
| H                       | 0.0000000000000000 | 0.0000000000000000 | 1.29975345820988  |
| 2                       |                    |                    |                   |
| hs CV-CCSD(T)/cc-pwCVTZ |                    |                    |                   |
| S                       | 0.0000000000000000 | 0.0000000000000000 | -0.03956889140986 |
| H                       | 0.0000000000000000 | 0.0000000000000000 | 1.29978271060986  |
| 2                       |                    |                    |                   |
| n2 FC-CCSD(T)/cc-pwCVDZ |                    |                    |                   |
| N                       | 0.0000000000000000 | 0.0000000000000000 | -0.55858918971404 |
| N                       | 0.0000000000000000 | 0.0000000000000000 | 0.55858918971404  |
| 2                       |                    |                    |                   |
| n2 FC-CCSD(T)/cc-pwCVQZ |                    |                    |                   |
| N                       | 0.0000000000000000 | 0.0000000000000000 | -0.54997991369247 |
| N                       | 0.0000000000000000 | 0.0000000000000000 | 0.54997991369247  |
| 2                       |                    |                    |                   |
| n2 FC-CCSD(T)/cc-pwCVTZ |                    |                    |                   |
| N                       | 0.0000000000000000 | 0.0000000000000000 | -0.55081991204861 |
| N                       | 0.0000000000000000 | 0.0000000000000000 | 0.55081991204861  |
| 2                       |                    |                    |                   |
| n2 CV-CCSD(T)/cc-pwCVDZ |                    |                    |                   |
| N                       | 0.0000000000000000 | 0.0000000000000000 | -0.55829127994120 |
| N                       | 0.0000000000000000 | 0.0000000000000000 | 0.55829127994120  |
| 2                       |                    |                    |                   |
| n2 CV-CCSD(T)/cc-pwCVQZ |                    |                    |                   |
| N                       | 0.0000000000000000 | 0.0000000000000000 | -0.54896751138602 |
| N                       | 0.0000000000000000 | 0.0000000000000000 | 0.54896751138602  |
| 2                       |                    |                    |                   |
| n2 CV-CCSD(T)/cc-pwCVTZ |                    |                    |                   |

|     |                      |                    |                   |
|-----|----------------------|--------------------|-------------------|
| N   | 0.0000000000000000   | 0.0000000000000000 | -0.54996866227027 |
| N   | 0.0000000000000000   | 0.0000000000000000 | 0.54996866227027  |
| 2   |                      |                    |                   |
| nh  | FC-CCSD(T)/cc-pwCVDZ |                    |                   |
| N   | 0.0000000000000000   | 0.0000000000000000 | -0.07888306883451 |
| H   | 0.0000000000000000   | 0.0000000000000000 | 0.97659342553451  |
| 2   |                      |                    |                   |
| nh  | FC-CCSD(T)/cc-pwCVQZ |                    |                   |
| N   | 0.0000000000000000   | 0.0000000000000000 | -0.06976723853912 |
| H   | 0.0000000000000000   | 0.0000000000000000 | 0.96747759523912  |
| 2   |                      |                    |                   |
| nh  | FC-CCSD(T)/cc-pwCVTZ |                    |                   |
| N   | 0.0000000000000000   | 0.0000000000000000 | -0.07043320162601 |
| H   | 0.0000000000000000   | 0.0000000000000000 | 0.96814355832601  |
| 2   |                      |                    |                   |
| nh  | CV-CCSD(T)/cc-pwCVDZ |                    |                   |
| N   | 0.0000000000000000   | 0.0000000000000000 | -0.07855956379828 |
| H   | 0.0000000000000000   | 0.0000000000000000 | 0.97626992049828  |
| 2   |                      |                    |                   |
| nh  | CV-CCSD(T)/cc-pwCVQZ |                    |                   |
| N   | 0.0000000000000000   | 0.0000000000000000 | -0.06915615394417 |
| H   | 0.0000000000000000   | 0.0000000000000000 | 0.96686651064417  |
| 2   |                      |                    |                   |
| nh  | CV-CCSD(T)/cc-pwCVTZ |                    |                   |
| N   | 0.0000000000000000   | 0.0000000000000000 | -0.06989814541842 |
| H   | 0.0000000000000000   | 0.0000000000000000 | 0.96760850211842  |
| 3   |                      |                    |                   |
| nh2 | FC-CCSD(T)/cc-pwCVDZ |                    |                   |
| N   | 0.0000000000000000   | 0.00000000001339   | -0.09761721736406 |
| H   | 0.0000000000000000   | 0.80148725919925   | 0.56619843622671  |
| H   | 0.0000000000000000   | -0.80148725921264  | 0.56619843623735  |
| 3   |                      |                    |                   |
| nh2 | FC-CCSD(T)/cc-pwCVQZ |                    |                   |
| N   | 0.0000000000000000   | 0.00000000001086   | -0.08178901801669 |
| H   | 0.0000000000000000   | 0.80065123487942   | 0.55828433655395  |
| H   | 0.0000000000000000   | -0.80065123489029  | 0.55828433656274  |
| 3   |                      |                    |                   |
| nh2 | FC-CCSD(T)/cc-pwCVTZ |                    |                   |
| N   | 0.0000000000000000   | 0.00000000001655   | -0.08437269456464 |
| H   | 0.0000000000000000   | 0.79904144352007   | 0.55957617482552  |
| H   | 0.0000000000000000   | -0.79904144353662  | 0.55957617483912  |
| 3   |                      |                    |                   |
| nh2 | CV-CCSD(T)/cc-pwCVDZ |                    |                   |
| N   | 0.0000000000000000   | -0.00000000000447  | -0.09700704341843 |

|     |                      |                    |                   |
|-----|----------------------|--------------------|-------------------|
| H   | 0.0000000000000000   | 0.80134915599527   | 0.56589334926128  |
| H   | 0.0000000000000000   | -0.80134915599080  | 0.56589334925714  |
| 3   |                      |                    |                   |
| nh2 | CV-CCSD(T)/cc-pwCVQZ |                    |                   |
| N   | 0.0000000000000000   | -0.000000000000485 | -0.08063224120609 |
| H   | 0.0000000000000000   | 0.80039596610447   | 0.55770594815500  |
| H   | 0.0000000000000000   | -0.80039596609962  | 0.55770594815109  |
| 3   |                      |                    |                   |
| nh2 | CV-CCSD(T)/cc-pwCVTZ |                    |                   |
| N   | 0.0000000000000000   | -0.000000000003756 | -0.08333602926591 |
| H   | 0.0000000000000000   | 0.79883913495484   | 0.55905784219813  |
| H   | 0.0000000000000000   | -0.79883913491727  | 0.55905784216778  |
| 4   |                      |                    |                   |
| nh3 | FC-CCSD(T)/cc-pwCVDZ |                    |                   |
| N   | 0.00000339247595     | 0.000000000000297  | 0.10537430527957  |
| H   | 0.93142427640429     | 0.000000000000543  | -0.32715247093347 |
| H   | -0.46571383449568    | -0.80663125407353  | -0.32714646257421 |
| H   | -0.46571383448457    | 0.80663125406512   | -0.32714646257189 |
| 4   |                      |                    |                   |
| nh3 | FC-CCSD(T)/cc-pwCVQZ |                    |                   |
| N   | -0.00000283496742    | 0.000000000001333  | 0.07247438868897  |
| H   | 0.93486288953659     | -0.000000000004769 | -0.31618263536399 |
| H   | -0.46743002729713    | -0.80961709477332  | -0.31618142206574 |
| H   | -0.46743002737204    | 0.80961709480768   | -0.31618142205924 |
| 4   |                      |                    |                   |
| nh3 | FC-CCSD(T)/cc-pwCVTZ |                    |                   |
| N   | -0.00000157082233    | -0.000000000000645 | 0.07840858041443  |
| H   | 0.93263546803305     | 0.000000000000256  | -0.31816047825137 |
| H   | -0.46631694865572    | -0.80768596138571  | -0.31815959647991 |
| H   | -0.46631694865500    | 0.80768596138960   | -0.31815959648315 |
| 4   |                      |                    |                   |
| nh3 | CV-CCSD(T)/cc-pwCVDZ |                    |                   |
| N   | 0.00000124717936     | -0.000000000000871 | 0.10415293996998  |
| H   | 0.93136698268241     | 0.000000000001010  | -0.32674464935370 |
| H   | -0.46568411498711    | -0.80658469712220  | -0.32673969070550 |
| H   | -0.46568411497466    | 0.80658469712082   | -0.32673969071078 |
| 4   |                      |                    |                   |
| nh3 | CV-CCSD(T)/cc-pwCVQZ |                    |                   |
| N   | -0.00000387695093    | 0.000000000006804  | 0.07005950346680  |
| H   | 0.93475087276996     | -0.000000000007477 | -0.31537793108658 |
| H   | -0.46737349791440    | -0.80952200001989  | -0.31537633160626 |
| H   | -0.46737349800463    | 0.80952200002662   | -0.31537633157396 |
| 4   |                      |                    |                   |
| nh3 | CV-CCSD(T)/cc-pwCVTZ |                    |                   |

|                         |                   |                   |                   |
|-------------------------|-------------------|-------------------|-------------------|
| N                       | -0.00000289692663 | 0.00000000000138  | 0.07624372899336  |
| H                       | 0.93256484106298  | 0.00000000000889  | -0.31743919704794 |
| H                       | -0.46628097212628 | -0.80762721302548 | -0.31743781137299 |
| H                       | -0.46628097211008 | 0.80762721301521  | -0.31743781137243 |
| 2                       |                   |                   |                   |
| no FC-CCSD(T)/cc-pwCVDZ |                   |                   |                   |
| N                       | 0.00000000000000  | 0.00000000000000  | -0.61819233421728 |
| O                       | 0.00000000000000  | 0.00000000000000  | 0.54170668141728  |
| 2                       |                   |                   |                   |
| no FC-CCSD(T)/cc-pwCVQZ |                   |                   |                   |
| N                       | 0.00000000000000  | 0.00000000000000  | -0.61304242692893 |
| O                       | 0.00000000000000  | 0.00000000000000  | 0.53655677412893  |
| 2                       |                   |                   |                   |
| no FC-CCSD(T)/cc-pwCVTZ |                   |                   |                   |
| N                       | 0.00000000000000  | 0.00000000000000  | -0.61407711704471 |
| O                       | 0.00000000000000  | 0.00000000000000  | 0.53759146424471  |
| 2                       |                   |                   |                   |
| no CV-CCSD(T)/cc-pwCVDZ |                   |                   |                   |
| N                       | 0.00000000000000  | 0.00000000000000  | -0.61788218065430 |
| O                       | 0.00000000000000  | 0.00000000000000  | 0.54139652785430  |
| 2                       |                   |                   |                   |
| no CV-CCSD(T)/cc-pwCVQZ |                   |                   |                   |
| N                       | 0.00000000000000  | 0.00000000000000  | -0.61222282407040 |
| O                       | 0.00000000000000  | 0.00000000000000  | 0.53573717127040  |
| 2                       |                   |                   |                   |
| no CV-CCSD(T)/cc-pwCVTZ |                   |                   |                   |
| N                       | 0.00000000000000  | 0.00000000000000  | -0.61338067460266 |
| O                       | 0.00000000000000  | 0.00000000000000  | 0.53689502180266  |
| 2                       |                   |                   |                   |
| o2 FC-CCSD(T)/cc-pwCVDZ |                   |                   |                   |
| O                       | 0.00000000000000  | 0.00000000000000  | -0.60787036620059 |
| O                       | 0.00000000000000  | 0.00000000000000  | 0.60787036620059  |
| 2                       |                   |                   |                   |
| o2 FC-CCSD(T)/cc-pwCVQZ |                   |                   |                   |
| O                       | 0.00000000000000  | 0.00000000000000  | -0.60378981643206 |
| O                       | 0.00000000000000  | 0.00000000000000  | 0.60378981643206  |
| 2                       |                   |                   |                   |
| o2 FC-CCSD(T)/cc-pwCVTZ |                   |                   |                   |
| O                       | 0.00000000000000  | 0.00000000000000  | -0.60571721705857 |
| O                       | 0.00000000000000  | 0.00000000000000  | 0.60571721705857  |
| 2                       |                   |                   |                   |
| o2 CV-CCSD(T)/cc-pwCVDZ |                   |                   |                   |
| O                       | 0.00000000000000  | 0.00000000000000  | -0.60742162261922 |
| O                       | 0.00000000000000  | 0.00000000000000  | 0.60742162261922  |

|     |                      |                    |                   |
|-----|----------------------|--------------------|-------------------|
| 2   |                      |                    |                   |
| o2  | CV-CCSD(T)/cc-pwCVQZ |                    |                   |
| O   | 0.0000000000000000   | 0.0000000000000000 | -0.60283397958405 |
| O   | 0.0000000000000000   | 0.0000000000000000 | 0.60283397958405  |
| 2   |                      |                    |                   |
| o2  | CV-CCSD(T)/cc-pwCVTZ |                    |                   |
| O   | 0.0000000000000000   | 0.0000000000000000 | -0.60486608300195 |
| O   | 0.0000000000000000   | 0.0000000000000000 | 0.60486608300195  |
| 2   |                      |                    |                   |
| oh  | FC-CCSD(T)/cc-pwCVDZ |                    |                   |
| O   | 0.0000000000000000   | 0.0000000000000000 | -0.06210806337357 |
| H   | 0.0000000000000000   | 0.0000000000000000 | 0.91725733217357  |
| 2   |                      |                    |                   |
| oh  | FC-CCSD(T)/cc-pwCVQZ |                    |                   |
| O   | 0.0000000000000000   | 0.0000000000000000 | -0.05728351695143 |
| H   | 0.0000000000000000   | 0.0000000000000000 | 0.91243278575143  |
| 2   |                      |                    |                   |
| oh  | FC-CCSD(T)/cc-pwCVTZ |                    |                   |
| O   | 0.0000000000000000   | 0.0000000000000000 | -0.05775721247440 |
| H   | 0.0000000000000000   | 0.0000000000000000 | 0.91290648127440  |
| 2   |                      |                    |                   |
| oh  | CV-CCSD(T)/cc-pwCVDZ |                    |                   |
| O   | 0.0000000000000000   | 0.0000000000000000 | -0.06186533750347 |
| H   | 0.0000000000000000   | 0.0000000000000000 | 0.91701460630347  |
| 2   |                      |                    |                   |
| oh  | CV-CCSD(T)/cc-pwCVQZ |                    |                   |
| O   | 0.0000000000000000   | 0.0000000000000000 | -0.05687103561785 |
| H   | 0.0000000000000000   | 0.0000000000000000 | 0.91202030441785  |
| 2   |                      |                    |                   |
| oh  | CV-CCSD(T)/cc-pwCVTZ |                    |                   |
| O   | 0.0000000000000000   | 0.0000000000000000 | -0.05739688058924 |
| H   | 0.0000000000000000   | 0.0000000000000000 | 0.91254614938924  |
| 2   |                      |                    |                   |
| sih | FC-CCSD(T)/cc-pwCVDZ |                    |                   |
| H   | 0.0000000000000000   | 0.0000000000000000 | -1.47517378597734 |
| Si  | 0.0000000000000000   | 0.0000000000000000 | 0.05874439497734  |
| 2   |                      |                    |                   |
| sih | FC-CCSD(T)/cc-pwCVQZ |                    |                   |
| H   | 0.0000000000000000   | 0.0000000000000000 | -1.46896652337177 |
| Si  | 0.0000000000000000   | 0.0000000000000000 | 0.05253713237177  |
| 2   |                      |                    |                   |
| sih | FC-CCSD(T)/cc-pwCVTZ |                    |                   |
| H   | 0.0000000000000000   | 0.0000000000000000 | -1.46948179804212 |
| Si  | 0.0000000000000000   | 0.0000000000000000 | 0.05305240704212  |

```
2
sih CV-CCSD(T)/cc-pwCVDZ
  H  0.000000000000000  0.000000000000000  -1.4759881962610
  Si 0.000000000000000  0.000000000000000   0.05916942862610
2
sih CV-CCSD(T)/cc-pwCVQZ
  H  0.000000000000000  0.000000000000000  -1.46723561349233
  Si 0.000000000000000  0.000000000000000   0.05080622249233
2
sih CV-CCSD(T)/cc-pwCVTZ
  H  0.000000000000000  0.000000000000000  -1.46807846514786
  Si 0.000000000000000  0.000000000000000   0.05164907414786
```

## Raw Energies

Table S16. Raw data for SD(T)/nZ (n = D, T, Q, 5) computations. System name (System), core electrons treatment (CV), basis set cardinal number (Cardinal), multiplicity (M), total number of electrons ( $N_{\text{el}}$ ), number of valence electrons ( $N_{\text{val\_el}}$ ), number of basis functions (Basis size), time for SD(T) computation, (Time SD(T)), time for SD computation (Time SD), and energy components in Hartree (HF, CCSD, CCSD(T)) are provided.

| System | CV | Cardinal | M | $N_{\text{el}}$ | $N_{\text{val\_el}}$ | Basis size | Time SD(T), min | Time SD, min | HF            | CCSD          | CCSD(T)       |
|--------|----|----------|---|-----------------|----------------------|------------|-----------------|--------------|---------------|---------------|---------------|
| alcl   | CV | 2        | 1 | 30              | 10                   | 54         | 0.024           | 0.02         | -701.48743452 | -701.97769775 | -701.98602345 |
| alcl   | CV | 3        | 1 | 30              | 10                   | 118        | 0.277           | 0.22         | -701.51217072 | -702.36124841 | -702.37855580 |
| alcl   | CV | 4        | 1 | 30              | 10                   | 218        | 2.215           | 1.339        | -701.51722646 | -702.53252070 | -702.55330936 |
| alcl   | CV | 5        | 1 | 30              | 10                   | 362        | 12.504          | 6.814        | -701.51804827 | -702.60820571 | -702.63014479 |
| alcl   | FC | 2        | 1 | 30              | 10                   | 54         | 0.004           | 0.004        | -701.48743452 | -701.69756399 | -701.70286173 |
| alcl   | FC | 3        | 1 | 30              | 10                   | 118        | 0.058           | 0.054        | -701.51217072 | -701.78362249 | -701.79517553 |
| alcl   | FC | 4        | 1 | 30              | 10                   | 218        | 0.593           | 0.556        | -701.51722646 | -701.80891571 | -701.82241347 |
| alcl   | FC | 5        | 1 | 30              | 10                   | 362        | 4.144           | 3.915        | -701.51804827 | -701.81578132 | -701.82987655 |
| alf    | CV | 2        | 1 | 22              | 10                   | 45         | 0.012           | 0.01         | -341.42636493 | -341.84377089 | -341.85051592 |
| alf    | CV | 3        | 1 | 22              | 10                   | 102        | 0.112           | 0.097        | -341.47411961 | -342.13260963 | -342.14601608 |
| alf    | CV | 4        | 1 | 22              | 10                   | 193        | 0.932           | 0.71         | -341.48547488 | -342.24207562 | -342.25792134 |
| alf    | CV | 5        | 1 | 22              | 10                   | 326        | 5.912           | 4.374        | -341.48788483 | -342.28853697 | -342.30523665 |
| alf    | FC | 2        | 1 | 22              | 10                   | 45         | 0.003           | 0.003        | -341.42636493 | -341.68304390 | -341.68785179 |
| alf    | FC | 3        | 1 | 22              | 10                   | 102        | 0.04            | 0.038        | -341.47411961 | -341.80052560 | -341.81033343 |
| alf    | FC | 4        | 1 | 22              | 10                   | 193        | 0.414           | 0.391        | -341.48547488 | -341.83363505 | -341.84490728 |
| alf    | FC | 5        | 1 | 22              | 10                   | 326        | 3.235           | 3.079        | -341.48788483 | -341.84381151 | -341.85557730 |
| alh    | CV | 2        | 1 | 14              | 4                    | 32         | 0.003           | 0.003        | -242.45506546 | -242.65895537 | -242.66184318 |
| alh    | CV | 3        | 1 | 14              | 4                    | 73         | 0.021           | 0.019        | -242.46258102 | -242.82196422 | -242.82674922 |
| alh    | CV | 4        | 1 | 14              | 4                    | 139        | 0.149           | 0.134        | -242.46423867 | -242.89536749 | -242.90120674 |
| alh    | CV | 5        | 1 | 14              | 4                    | 236        | 0.966           | 0.828        | -242.46457579 | -242.93047397 | -242.93668901 |
| alh    | FC | 2        | 1 | 14              | 4                    | 32         | 0.001           | 0.001        | -242.45506546 | -242.52920217 | -242.53022690 |
| alh    | FC | 3        | 1 | 14              | 4                    | 73         | 0.007           | 0.007        | -242.46258102 | -242.54532239 | -242.54676769 |
| alh    | FC | 4        | 1 | 14              | 4                    | 139        | 0.078           | 0.077        | -242.46423867 | -242.54919683 | -242.55078975 |
| alh    | FC | 5        | 1 | 14              | 4                    | 236        | 0.612           | 0.607        | -242.46457579 | -242.55005943 | -242.55168839 |
| alh3   | CV | 2        | 1 | 16              | 6                    | 42         | 0.006           | 0.005        | -243.63483211 | -243.86441299 | -243.86711139 |
| alh3   | CV | 3        | 1 | 16              | 6                    | 101        | 0.062           | 0.054        | -243.64655604 | -244.04054779 | -244.04487549 |
| alh3   | CV | 4        | 1 | 16              | 6                    | 199        | 0.556           | 0.439        | -243.64926999 | -244.11717104 | -244.12252480 |
| alh3   | CV | 5        | 1 | 16              | 6                    | 346        | 3.624           | 2.831        | -243.64972315 | -244.15291859 | -244.15864310 |

| System | CV | Cardinal | M | N <sub>el</sub> | N <sub>val,el</sub> | Basis size | Time SD(T), min | Time SD, min | HF            | CCSD          | CCSD(T)       |
|--------|----|----------|---|-----------------|---------------------|------------|-----------------|--------------|---------------|---------------|---------------|
| alh3   | FC | 2        | 1 | 16              | 6                   | 42         | 0.002           | 0.002        | -243.63483211 | -243.73625204 | -243.73738078 |
| alh3   | FC | 3        | 1 | 16              | 6                   | 101        | 0.025           | 0.025        | -243.64655604 | -243.76437007 | -243.76595385 |
| alh3   | FC | 4        | 1 | 16              | 6                   | 199        | 0.329           | 0.322        | -243.64926999 | -243.77131553 | -243.77306660 |
| alh3   | FC | 5        | 1 | 16              | 6                   | 346        | 2.689           | 2.639        | -243.64972315 | -243.77278216 | -243.77457728 |
| bf     | CV | 2        | 1 | 14              | 10                  | 36         | 0.004           | 0.004        | -124.10797240 | -124.44236471 | -124.44934302 |
| bf     | CV | 3        | 1 | 14              | 10                  | 86         | 0.035           | 0.031        | -124.15691173 | -124.59849891 | -124.61080035 |
| bf     | CV | 4        | 1 | 14              | 10                  | 168        | 0.314           | 0.276        | -124.16598520 | -124.64017722 | -124.65376861 |
| bf     | CV | 5        | 1 | 14              | 10                  | 290        | 2.089           | 1.801        | -124.16832541 | -124.65338789 | -124.66742300 |
| bf     | FC | 2        | 1 | 14              | 10                  | 36         | 0.002           | 0.002        | -124.10797240 | -124.38342834 | -124.39005023 |
| bf     | FC | 3        | 1 | 14              | 10                  | 86         | 0.024           | 0.023        | -124.15691173 | -124.49958663 | -124.51109742 |
| bf     | FC | 4        | 1 | 14              | 10                  | 168        | 0.282           | 0.267        | -124.16598520 | -124.52948713 | -124.54217465 |
| bf     | FC | 5        | 1 | 14              | 10                  | 290        | 2.097           | 1.986        | -124.16832541 | -124.53927173 | -124.55237472 |
| bh     | CV | 2        | 1 | 6               | 4                   | 23         | 0.001           | 0.001        | -25.12552999  | -25.24254686  | -25.24424148  |
| bh     | CV | 3        | 1 | 6               | 4                   | 57         | 0.005           | 0.004        | -25.13010666  | -25.27312305  | -25.27575010  |
| bh     | CV | 4        | 1 | 6               | 4                   | 114        | 0.05            | 0.049        | -25.13133371  | -25.28165309  | -25.28447264  |
| bh     | CV | 5        | 1 | 6               | 4                   | 200        | 0.428           | 0.42         | -25.13156523  | -25.28400207  | -25.28687896  |
| bh     | FC | 2        | 1 | 6               | 4                   | 23         | 0.001           | 0.001        | -25.12552999  | -25.21491106  | -25.21632444  |
| bh     | FC | 3        | 1 | 6               | 4                   | 57         | 0.004           | 0.004        | -25.13010666  | -25.22969058  | -25.23179473  |
| bh     | FC | 4        | 1 | 6               | 4                   | 114        | 0.042           | 0.041        | -25.13133371  | -25.23316006  | -25.23540306  |
| bh     | FC | 5        | 1 | 6               | 4                   | 200        | 0.541           | 0.538        | -25.13156523  | -25.23405244  | -25.23633944  |
| bh3    | CV | 2        | 1 | 8               | 6                   | 33         | 0.002           | 0.002        | -26.39131984  | -26.53702172  | -26.53876304  |
| bh3    | CV | 3        | 1 | 8               | 6                   | 85         | 0.017           | 0.017        | -26.40044066  | -26.58147356  | -26.58437733  |
| bh3    | CV | 4        | 1 | 8               | 6                   | 174        | 0.23            | 0.22         | -26.40216418  | -26.59278324  | -26.59593659  |
| bh3    | CV | 5        | 1 | 8               | 6                   | 310        | 1.966           | 1.887        | -26.40255734  | -26.59590766  | -26.59913375  |
| bh3    | FC | 2        | 1 | 8               | 6                   | 33         | 0.001           | 0.001        | -26.39131984  | -26.50863137  | -26.51023014  |
| bh3    | FC | 3        | 1 | 8               | 6                   | 85         | 0.015           | 0.014        | -26.40044066  | -26.53652671  | -26.53913096  |
| bh3    | FC | 4        | 1 | 8               | 6                   | 174        | 0.211           | 0.205        | -26.40216418  | -26.54263591  | -26.54544450  |
| bh3    | FC | 5        | 1 | 8               | 6                   | 310        | 1.838           | 1.802        | -26.40255734  | -26.54426778  | -26.54713798  |
| c2h2   | CV | 2        | 1 | 14              | 10                  | 46         | 0.006           | 0.005        | -76.82720436  | -77.16466299  | -77.17685295  |
| c2h2   | CV | 3        | 1 | 14              | 10                  | 114        | 0.084           | 0.076        | -76.84989800  | -77.27171409  | -77.28953026  |
| c2h2   | CV | 4        | 1 | 14              | 10                  | 228        | 0.856           | 0.731        | -76.85426105  | -77.30007012  | -77.31905369  |
| c2h2   | CV | 5        | 1 | 14              | 10                  | 400        | 6.371           | 5.303        | -76.85525538  | -77.30847742  | -77.32783020  |
| c2h2   | FC | 2        | 1 | 14              | 10                  | 46         | 0.004           | 0.004        | -76.82720436  | -77.10443718  | -77.11619100  |
| c2h2   | FC | 3        | 1 | 14              | 10                  | 114        | 0.061           | 0.057        | -76.84989800  | -77.17560411  | -77.19249788  |



| System | CV | Cardinal | M | N <sub>el</sub> | N <sub>val_el</sub> | Basis size | Time SD(T), min | Time SD, min | HF            | CCSD          | CCSD(T)       |
|--------|----|----------|---|-----------------|---------------------|------------|-----------------|--------------|---------------|---------------|---------------|
| c2h2   | FC | 4        | 1 | 14              | 10                  | 228        | 0.795           | 0.747        | -76.85426105  | -77.19295490  | -77.21089098  |
| c2h2   | FC | 5        | 1 | 14              | 10                  | 400        | 6.689           | 6.289        | -76.85525538  | -77.19818662  | -77.21646252  |
| c2h3f  | CV | 2        | 1 | 24              | 18                  | 69         | 0.037           | 0.032        | -176.89661610 | -177.47946549 | -177.49426889 |
| c2h3f  | CV | 3        | 1 | 24              | 18                  | 171        | 0.691           | 0.515        | -176.95431818 | -177.70985308 | -177.73455332 |
| c2h3f  | CV | 4        | 1 | 24              | 18                  | 342        | 7.504           | 5.095        | -176.96741978 | -177.77326954 | -177.80032402 |
| c2h3f  | CV | 5        | 1 | 24              | 18                  | 600        | 78.646          | 56.099       | -176.97084744 | -177.79312419 | -177.82098034 |
| c2h3f  | FC | 2        | 1 | 24              | 18                  | 69         | 0.023           | 0.021        | -176.89661610 | -177.38806230 | -177.40230797 |
| c2h3f  | FC | 3        | 1 | 24              | 18                  | 171        | 0.453           | 0.375        | -176.95431818 | -177.55892428 | -177.58239653 |
| c2h3f  | FC | 4        | 1 | 24              | 18                  | 342        | 4.964           | 3.925        | -176.96741978 | -177.60480464 | -177.63044754 |
| c2h3f  | FC | 5        | 1 | 24              | 18                  | 600        | 54.555          | 45           | -176.97084744 | -177.61956450 | -177.64596456 |
| c2h4   | CV | 2        | 1 | 16              | 12                  | 56         | 0.01            | 0.009        | -78.04097902  | -78.41070840  | -78.42146853  |
| c2h4   | CV | 3        | 1 | 16              | 12                  | 142        | 0.166           | 0.14         | -78.06435059  | -78.52394214  | -78.54018133  |
| c2h4   | CV | 4        | 1 | 16              | 12                  | 288        | 2.114           | 1.707        | -78.06924606  | -78.55386348  | -78.57128837  |
| c2h4   | CV | 5        | 1 | 16              | 12                  | 510        | 22.109          | 18.012       | -78.07043905  | -78.56262932  | -78.58042015  |
| c2h4   | FC | 2        | 1 | 16              | 12                  | 56         | 0.007           | 0.007        | -78.04097902  | -78.35030269  | -78.36065267  |
| c2h4   | FC | 3        | 1 | 16              | 12                  | 142        | 0.139           | 0.128        | -78.06435059  | -78.42784603  | -78.44323470  |
| c2h4   | FC | 4        | 1 | 16              | 12                  | 288        | 1.744           | 1.567        | -78.06924606  | -78.44681352  | -78.46327102  |
| c2h4   | FC | 5        | 1 | 16              | 12                  | 510        | 20.156          | 18.411       | -78.07043905  | -78.45241844  | -78.46921485  |
| cch    | CV | 2        | 2 | 13              | 9                   | 41         | 0.017           | 0.015        | -76.15856253  | -76.45454280  | -76.46550457  |
| cch    | CV | 3        | 2 | 13              | 9                   | 100        | 0.61            | 0.577        | -76.17833456  | -76.55266386  | -76.56885822  |
| cch    | CV | 4        | 2 | 13              | 9                   | 198        | 9.709           | 9.309        | -76.18244731  | -76.57916459  | -76.59647285  |
| cch    | CV | 5        | 2 | 13              | 9                   | 345        | 112.289         | 109.052      | -76.18334206  | -76.58704815  | -76.60471790  |
| cch    | FC | 2        | 2 | 13              | 9                   | 41         | 0.015           | 0.014        | -76.15856253  | -76.39478142  | -76.40528403  |
| cch    | FC | 3        | 2 | 13              | 9                   | 100        | 0.513           | 0.497        | -76.17833456  | -76.45711823  | -76.47236167  |
| cch    | FC | 4        | 2 | 13              | 9                   | 198        | 9.029           | 8.845        | -76.18244731  | -76.47265224  | -76.48888438  |
| cch    | FC | 5        | 2 | 13              | 9                   | 345        | 105.893         | 104.604      | -76.18334206  | -76.47737285  | -76.49393696  |
| cc12   | CV | 2        | 1 | 40              | 18                  | 72         | 0.087           | 0.071        | -956.76896301 | -957.53462782 | -957.55390078 |
| cc12   | CV | 3        | 1 | 40              | 18                  | 161        | 1.354           | 0.862        | -956.80970936 | -958.01926242 | -958.05500135 |
| cc12   | CV | 4        | 1 | 40              | 18                  | 302        | 12.112          | 5.831        | -956.81937586 | -958.22635832 | -958.26725669 |
| cc12   | CV | 5        | 1 | 40              | 18                  | 507        | 101.036         | 44.793       | -956.82096833 | -958.31098463 | -958.35357312 |
| cc12   | FC | 2        | 1 | 40              | 18                  | 72         | 0.018           | 0.016        | -956.76896301 | -957.20560183 | -957.22201535 |
| cc12   | FC | 3        | 1 | 40              | 18                  | 161        | 0.31            | 0.262        | -956.80970936 | -957.37163156 | -957.40165488 |
| cc12   | FC | 4        | 1 | 40              | 18                  | 302        | 2.864           | 2.267        | -956.81937586 | -957.42069545 | -957.45453062 |
| cc12   | FC | 5        | 1 | 40              | 18                  | 507        | 28.058          | 22.813       | -956.82096833 | -957.43467598 | -957.46974976 |

| System | CV | Cardinal | M | N <sub>el</sub> | N <sub>val,el</sub> | Basis size | Time SD(T), min | Time SD, min | HF            | CCSD          | CCSD(T)       |
|--------|----|----------|---|-----------------|---------------------|------------|-----------------|--------------|---------------|---------------|---------------|
| cf     | CV | 2        | 2 | 15              | 11                  | 36         | 0.012           | 0.01         | -137.18045979 | -137.53899640 | -137.54710121 |
| cf     | CV | 3        | 2 | 15              | 11                  | 86         | 0.284           | 0.26         | -137.22542867 | -137.70191830 | -137.71626947 |
| cf     | CV | 4        | 2 | 15              | 11                  | 168        | 4.15            | 3.869        | -137.23574179 | -137.74694180 | -137.76281365 |
| cf     | CV | 5        | 2 | 15              | 11                  | 290        | 47.101          | 44.372       | -137.23848787 | -137.76139280 | -137.77779732 |
| cf     | FC | 2        | 2 | 15              | 11                  | 36         | 0.008           | 0.007        | -137.18045979 | -137.47873664 | -137.48651075 |
| cf     | FC | 3        | 2 | 15              | 11                  | 86         | 0.254           | 0.24         | -137.22542867 | -137.60035045 | -137.61394336 |
| cf     | FC | 4        | 2 | 15              | 11                  | 168        | 3.947           | 3.805        | -137.23574179 | -137.63340248 | -137.64840163 |
| cf     | FC | 5        | 2 | 15              | 11                  | 290        | 45.921          | 44.715       | -137.23848787 | -137.64436619 | -137.65987044 |
| cf2    | CV | 2        | 1 | 24              | 18                  | 54         | 0.02            | 0.017        | -236.67370303 | -237.28146974 | -237.29534730 |
| cf2    | CV | 3        | 1 | 24              | 18                  | 129        | 0.261           | 0.212        | -236.75566954 | -237.56850999 | -237.59346016 |
| cf2    | CV | 4        | 1 | 24              | 18                  | 252        | 2.683           | 1.894        | -236.77427481 | -237.64841724 | -237.67616499 |
| cf2    | CV | 5        | 1 | 24              | 18                  | 435        | 19.437          | 12.425       | -236.77924305 | -237.67436739 | -237.70312009 |
| cf2    | FC | 2        | 1 | 24              | 18                  | 54         | 0.011           | 0.01         | -236.67370303 | -237.19005650 | -237.20343518 |
| cf2    | FC | 3        | 1 | 24              | 18                  | 129        | 0.163           | 0.142        | -236.75566954 | -237.41201904 | -237.43580021 |
| cf2    | FC | 4        | 1 | 24              | 18                  | 252        | 1.711           | 1.374        | -236.77427481 | -237.47337583 | -237.49977103 |
| cf2    | FC | 5        | 1 | 24              | 18                  | 435        | 12.585          | 9.631        | -236.77924305 | -237.49390554 | -237.52126040 |
| ch     | CV | 2        | 2 | 7               | 5                   | 23         | 0.003           | 0.003        | -38.27278717  | -38.40974415  | -38.41187495  |
| ch     | CV | 3        | 2 | 7               | 5                   | 57         | 0.049           | 0.046        | -38.28152217  | -38.45547299  | -38.45929131  |
| ch     | CV | 4        | 2 | 7               | 5                   | 114        | 0.809           | 0.789        | -38.28378371  | -38.46764908  | -38.47185971  |
| ch     | CV | 5        | 2 | 7               | 5                   | 200        | 8.227           | 8.108        | -38.28433904  | -38.47118475  | -38.47551683  |
| ch     | FC | 2        | 2 | 7               | 5                   | 23         | 0.003           | 0.003        | -38.27278717  | -38.38054181  | -38.38246574  |
| ch     | FC | 3        | 2 | 7               | 5                   | 57         | 0.046           | 0.045        | -38.28152217  | -38.40892012  | -38.41232820  |
| ch     | FC | 4        | 2 | 7               | 5                   | 114        | 0.852           | 0.84         | -38.28378371  | -38.41573577  | -38.41948509  |
| ch     | FC | 5        | 2 | 7               | 5                   | 200        | 8.229           | 8.159        | -38.28433904  | -38.41772458  | -38.42158369  |
| ch2c   | CV | 2        | 1 | 14              | 10                  | 46         | 0.007           | 0.006        | -76.77432688  | -77.10003920  | -77.11044677  |
| ch2c   | CV | 3        | 1 | 14              | 10                  | 114        | 0.101           | 0.093        | -76.79433596  | -77.20232713  | -77.21782426  |
| ch2c   | CV | 4        | 1 | 14              | 10                  | 228        | 0.973           | 0.842        | -76.79880507  | -77.22991901  | -77.24652766  |
| ch2c   | CV | 5        | 1 | 14              | 10                  | 400        | 7.157           | 6.061        | -76.79984691  | -77.23808964  | -77.25505897  |
| ch2c   | FC | 2        | 1 | 14              | 10                  | 46         | 0.004           | 0.004        | -76.77432688  | -77.04036213  | -77.05033253  |
| ch2c   | FC | 3        | 1 | 14              | 10                  | 114        | 0.076           | 0.073        | -76.79433596  | -77.10715099  | -77.12175352  |
| ch2c   | FC | 4        | 1 | 14              | 10                  | 228        | 0.915           | 0.865        | -76.79880507  | -77.12383550  | -77.13943088  |
| ch2c   | FC | 5        | 1 | 14              | 10                  | 400        | 7.581           | 7.17         | -76.79984691  | -77.12885900  | -77.14478723  |
| ch2ch  | CV | 2        | 2 | 15              | 11                  | 51         | 0.04            | 0.035        | -77.39919570  | -77.73121864  | -77.74096624  |
| ch2ch  | CV | 3        | 2 | 15              | 11                  | 128        | 1.517           | 1.425        | -77.42073732  | -77.83841391  | -77.85331593  |

| System   | CV | Cardinal | M | N <sub>el</sub> | N <sub>val,el</sub> | Basis size | Time SD(T), min | Time SD, min | HF           | CCSD         | CCSD(T)      |
|----------|----|----------|---|-----------------|---------------------|------------|-----------------|--------------|--------------|--------------|--------------|
| ch2ch    | CV | 4        | 2 | 15              | 11                  | 258        | 28.112          | 26.402       | -77.42538301 | -77.86701751 | -77.88307701 |
| ch2ch    | CV | 5        | 2 | 15              | 11                  | 455        | 424.079         | 411.496      | -77.42646791 | -77.87541145 | -77.89183712 |
| ch2ch    | FC | 2        | 2 | 15              | 11                  | 51         | 0.032           | 0.029        | -77.39919570 | -77.67108795 | -77.68043242 |
| ch2ch    | FC | 3        | 2 | 15              | 11                  | 128        | 1.433           | 1.381        | -77.42073732 | -77.74259750 | -77.75666524 |
| ch2ch    | FC | 4        | 2 | 15              | 11                  | 258        | 27.328          | 26.558       | -77.42538301 | -77.76025849 | -77.77536869 |
| ch2ch    | FC | 5        | 2 | 15              | 11                  | 455        | 420.273         | 414.859      | -77.42646791 | -77.76549585 | -77.78094543 |
| ch2nh    | CV | 2        | 1 | 16              | 12                  | 51         | 0.01            | 0.009        | -94.03973426 | -94.43134879 | -94.44298800 |
| ch2nh    | CV | 3        | 1 | 16              | 12                  | 128        | 0.143           | 0.129        | -94.06781976 | -94.55926329 | -94.57734797 |
| ch2nh    | CV | 4        | 1 | 16              | 12                  | 258        | 1.482           | 1.186        | -94.07451276 | -94.59423003 | -94.61374272 |
| ch2nh    | CV | 5        | 1 | 16              | 12                  | 455        | 11.939          | 9.312        | -94.07615183 | -94.60471328 | -94.62469489 |
| ch2nh    | FC | 2        | 1 | 16              | 12                  | 51         | 0.006           | 0.006        | -94.03973426 | -94.37065913 | -94.38188463 |
| ch2nh    | FC | 3        | 1 | 16              | 12                  | 128        | 0.102           | 0.095        | -94.06781976 | -94.46113382 | -94.47833387 |
| ch2nh    | FC | 4        | 1 | 16              | 12                  | 258        | 1.25            | 1.121        | -94.07451276 | -94.48485029 | -94.50335511 |
| ch2nh    | FC | 5        | 1 | 16              | 12                  | 455        | 10.574          | 9.461        | -94.07615183 | -94.49210427 | -94.51104884 |
| ch2nh2   | CV | 2        | 2 | 17              | 13                  | 56         | 0.056           | 0.048        | -94.60051824 | -94.99229787 | -95.00112317 |
| ch2nh2   | CV | 3        | 2 | 17              | 13                  | 142        | 2.239           | 2.054        | -94.63112809 | -95.12767397 | -95.14293421 |
| ch2nh2   | CV | 4        | 2 | 17              | 13                  | 288        | 47.623          | 44.139       | -94.63834294 | -95.16433130 | -95.18107696 |
| ch2nh2   | CV | 5        | 2 | 17              | 13                  | 510        | 711.333         | 685.542      | -94.64036766 | -95.17552503 | -95.19277226 |
| ch2nh2   | FC | 2        | 2 | 17              | 13                  | 56         | 0.046           | 0.042        | -94.60051824 | -94.93127135 | -94.93974741 |
| ch2nh2   | FC | 3        | 2 | 17              | 13                  | 142        | 2.129           | 2.025        | -94.63112809 | -95.02912745 | -95.04362357 |
| ch2nh2   | FC | 4        | 2 | 17              | 13                  | 288        | 45.043          | 43.376       | -94.63834294 | -95.05452816 | -95.07039502 |
| ch2nh2   | FC | 5        | 2 | 17              | 13                  | 510        | 662.936         | 650.732      | -94.64036766 | -95.06249631 | -95.07883723 |
| ch2-sing | CV | 2        | 1 | 8               | 6                   | 28         | 0.002           | 0.001        | -38.88143268 | -39.05133856 | -39.05462717 |
| ch2-sing | CV | 3        | 1 | 8               | 6                   | 71         | 0.012           | 0.012        | -38.89256998 | -39.10532384 | -39.11073659 |
| ch2-sing | CV | 4        | 1 | 8               | 6                   | 144        | 0.136           | 0.13         | -38.89517009 | -39.11948718 | -39.12540203 |
| ch2-sing | CV | 5        | 1 | 8               | 6                   | 255        | 1.114           | 1.071        | -38.89585672 | -39.12362071 | -39.12969229 |
| ch2-sing | FC | 2        | 1 | 8               | 6                   | 28         | 0.001           | 0.001        | -38.88143268 | -39.02187633 | -39.02492636 |
| ch2-sing | FC | 3        | 1 | 8               | 6                   | 71         | 0.01            | 0.01         | -38.89256998 | -39.05842200 | -39.06338185 |
| ch2-sing | FC | 4        | 1 | 8               | 6                   | 144        | 0.12            | 0.118        | -38.89517009 | -39.06719566 | -39.07260377 |
| ch2-sing | FC | 5        | 1 | 8               | 6                   | 255        | 1.05            | 1.031        | -38.89585672 | -39.06977374 | -39.07532648 |
| ch2-trip | CV | 2        | 3 | 8               | 6                   | 28         | 0.004           | 0.004        | -38.92711624 | -39.07182794 | -39.07382440 |
| ch2-trip | CV | 3        | 3 | 8               | 6                   | 71         | 0.122           | 0.116        | -38.93792252 | -39.12377946 | -39.12758515 |
| ch2-trip | CV | 4        | 3 | 8               | 6                   | 144        | 2.151           | 2.101        | -38.94026082 | -39.13710189 | -39.14133833 |
| ch2-trip | CV | 5        | 3 | 8               | 6                   | 255        | 21.054          | 20.696       | -38.94083973 | -39.14093134 | -39.14529619 |

| System   | CV | Cardinal | M | N <sub>el</sub> | N <sub>val,el</sub> | Basis size | Time SD(T), min | Time SD, min | HF            | CCSD          | CCSD(T)       |
|----------|----|----------|---|-----------------|---------------------|------------|-----------------|--------------|---------------|---------------|---------------|
| ch2-trip | FC | 2        | 3 | 8               | 6                   | 28         | 0.004           | 0.003        | -38.92711624  | -39.04203369  | -39.04389787  |
| ch2-trip | FC | 3        | 3 | 8               | 6                   | 71         | 0.109           | 0.105        | -38.93792252  | -39.07618379  | -39.07970019  |
| ch2-trip | FC | 4        | 3 | 8               | 6                   | 144        | 2.024           | 1.992        | -38.94026082  | -39.08405484  | -39.08795587  |
| ch2-trip | FC | 5        | 3 | 8               | 6                   | 255        | 19.974          | 19.768       | -38.94083973  | -39.08631392  | -39.09033266  |
| ch3      | CV | 2        | 2 | 9               | 7                   | 33         | 0.006           | 0.005        | -39.56429682  | -39.74582902  | -39.74875663  |
| ch3      | CV | 3        | 2 | 9               | 7                   | 85         | 0.224           | 0.213        | -39.57776830  | -39.80603994  | -39.81123460  |
| ch3      | CV | 4        | 2 | 9               | 7                   | 174        | 4.106           | 3.987        | -39.58037970  | -39.82120716  | -39.82692422  |
| ch3      | CV | 5        | 2 | 9               | 7                   | 310        | 50.013          | 49.06        | -39.58105650  | -39.82559877  | -39.83147174  |
| ch3      | FC | 2        | 2 | 9               | 7                   | 33         | 0.005           | 0.005        | -39.56429682  | -39.71570634  | -39.71847719  |
| ch3      | FC | 3        | 2 | 9               | 7                   | 85         | 0.213           | 0.205        | -39.57776830  | -39.75808935  | -39.76295124  |
| ch3      | FC | 4        | 2 | 9               | 7                   | 174        | 4.067           | 3.99         | -39.58037970  | -39.76778641  | -39.77311978  |
| ch3      | FC | 5        | 2 | 9               | 7                   | 310        | 49.833          | 49.285       | -39.58105650  | -39.77060204  | -39.77607944  |
| ch3f     | CV | 2        | 1 | 18              | 14                  | 51         | 0.011           | 0.01         | -139.04550410 | -139.47226894 | -139.47974532 |
| ch3f     | CV | 3        | 1 | 18              | 14                  | 128        | 0.162           | 0.139        | -139.09489582 | -139.65601095 | -139.67052735 |
| ch3f     | CV | 4        | 1 | 18              | 14                  | 258        | 1.788           | 1.354        | -139.10624491 | -139.70663179 | -139.72297612 |
| ch3f     | CV | 5        | 1 | 18              | 14                  | 455        | 13.83           | 10.156       | -139.10935102 | -139.72267996 | -139.73965699 |
| ch3f     | FC | 2        | 1 | 18              | 14                  | 51         | 0.007           | 0.007        | -139.04550410 | -139.41101284 | -139.41816987 |
| ch3f     | FC | 3        | 1 | 18              | 14                  | 128        | 0.12            | 0.108        | -139.09489582 | -139.55316487 | -139.56694731 |
| ch3f     | FC | 4        | 1 | 18              | 14                  | 258        | 1.297           | 1.089        | -139.10624491 | -139.59174131 | -139.60723211 |
| ch3f     | FC | 5        | 1 | 18              | 14                  | 455        | 9.985           | 8.23         | -139.10935102 | -139.60428008 | -139.62037382 |
| ch3nh    | CV | 2        | 2 | 17              | 13                  | 56         | 0.053           | 0.045        | -94.60262299  | -94.98662273  | -94.99492759  |
| ch3nh    | CV | 3        | 2 | 17              | 13                  | 142        | 2.224           | 2.044        | -94.63139068  | -95.11840549  | -95.13264558  |
| ch3nh    | CV | 4        | 2 | 17              | 13                  | 288        | 45.182          | 41.697       | -94.63810084  | -95.15393630  | -95.16957136  |
| ch3nh    | CV | 5        | 2 | 17              | 13                  | 510        | 698.696         | 663.058      | -94.63982274  | -95.16458493  | -95.18068094  |
| ch3nh    | FC | 2        | 2 | 17              | 13                  | 56         | 0.043           | 0.038        | -94.60262299  | -94.92585687  | -94.93381416  |
| ch3nh    | FC | 3        | 2 | 17              | 13                  | 142        | 2.132           | 2.028        | -94.63139068  | -95.02027498  | -95.03375669  |
| ch3nh    | FC | 4        | 2 | 17              | 13                  | 288        | 42.98           | 41.312       | -94.63810084  | -95.04458217  | -95.05934493  |
| ch3nh    | FC | 5        | 2 | 17              | 13                  | 510        | 686.631         | 670.905      | -94.63982274  | -95.05201033  | -95.06720671  |
| ch3nh2   | CV | 2        | 1 | 18              | 14                  | 61         | 0.016           | 0.014        | -95.22258932  | -95.64519129  | -95.65456068  |
| ch3nh2   | CV | 3        | 1 | 18              | 14                  | 156        | 0.323           | 0.267        | -95.25379676  | -95.78522455  | -95.80121918  |
| ch3nh2   | CV | 4        | 1 | 18              | 14                  | 318        | 3.879           | 2.998        | -95.26091262  | -95.82285501  | -95.84036172  |
| ch3nh2   | CV | 5        | 1 | 18              | 14                  | 565        | 42.844          | 34.541       | -95.26283664  | -95.83420454  | -95.85220541  |
| ch3nh2   | FC | 2        | 1 | 18              | 14                  | 61         | 0.011           | 0.01         | -95.22258932  | -95.58407553  | -95.59308528  |
| ch3nh2   | FC | 3        | 1 | 18              | 14                  | 156        | 0.241           | 0.213        | -95.25379676  | -95.68670051  | -95.70191564  |

| System | CV | Cardinal | M | N <sub>el</sub> | N <sub>val,el</sub> | Basis size | Time SD(T), min | Time SD, min | HF            | CCSD          | CCSD(T)       |
|--------|----|----------|---|-----------------|---------------------|------------|-----------------|--------------|---------------|---------------|---------------|
| ch3nh2 | FC | 4        | 1 | 18              | 14                  | 318        | 2.84            | 2.413        | -95.26091262  | -95.71308558  | -95.72969642  |
| ch3nh2 | FC | 5        | 1 | 18              | 14                  | 565        | 33.945          | 29.987       | -95.26283664  | -95.72120803  | -95.73828495  |
| ch4    | CV | 2        | 1 | 10              | 8                   | 38         | 0.002           | 0.002        | -40.19927119  | -40.41629695  | -40.42038215  |
| ch4    | CV | 3        | 1 | 10              | 8                   | 99         | 0.035           | 0.032        | -40.21367721  | -40.48193028  | -40.48872601  |
| ch4    | CV | 4        | 1 | 10              | 8                   | 204        | 0.475           | 0.438        | -40.21628199  | -40.49831278  | -40.50570033  |
| ch4    | CV | 5        | 1 | 10              | 8                   | 365        | 4.043           | 3.78         | -40.21696634  | -40.50301282  | -40.51056607  |
| ch4    | FC | 2        | 1 | 10              | 8                   | 38         | 0.002           | 0.002        | -40.19927119  | -40.38590669  | -40.38982031  |
| ch4    | FC | 3        | 1 | 10              | 8                   | 99         | 0.028           | 0.027        | -40.21367721  | -40.43369912  | -40.44013748  |
| ch4    | FC | 4        | 1 | 10              | 8                   | 204        | 0.386           | 0.364        | -40.21628199  | -40.44459447  | -40.45157121  |
| ch4    | FC | 5        | 1 | 10              | 8                   | 365        | 3.422           | 3.282        | -40.21696634  | -40.44771207  | -40.45484225  |
| c-hcoh | CV | 2        | 1 | 16              | 12                  | 46         | 0.008           | 0.007        | -113.79253313 | -114.18782665 | -114.19806287 |
| c-hcoh | CV | 3        | 1 | 16              | 12                  | 114        | 0.11            | 0.099        | -113.82794071 | -114.33472183 | -114.35190094 |
| c-hcoh | CV | 4        | 1 | 16              | 12                  | 228        | 1.011           | 0.832        | -113.83635745 | -114.37527481 | -114.39402761 |
| c-hcoh | CV | 5        | 1 | 16              | 12                  | 400        | 8.081           | 6.604        | -113.83844613 | -114.38777090 | -114.40705490 |
| c-hcoh | FC | 2        | 1 | 16              | 12                  | 46         | 0.005           | 0.005        | -113.79253313 | -114.12747375 | -114.13732731 |
| c-hcoh | FC | 3        | 1 | 16              | 12                  | 114        | 0.077           | 0.072        | -113.82794071 | -114.23505330 | -114.25138918 |
| c-hcoh | FC | 4        | 1 | 16              | 12                  | 228        | 0.846           | 0.766        | -113.83635745 | -114.26403780 | -114.28182669 |
| c-hcoh | FC | 5        | 1 | 16              | 12                  | 400        | 7.095           | 6.46         | -113.83844613 | -114.27316951 | -114.29146068 |
| c-hono | CV | 2        | 1 | 24              | 18                  | 59         | 0.029           | 0.026        | -204.66044196 | -205.31725725 | -205.33913320 |
| c-hono | CV | 3        | 1 | 24              | 18                  | 143        | 0.422           | 0.34         | -204.72351915 | -205.56831470 | -205.60317185 |
| c-hono | CV | 4        | 1 | 24              | 18                  | 282        | 4.149           | 2.949        | -204.73886108 | -205.63924582 | -205.67714338 |
| c-hono | CV | 5        | 1 | 24              | 18                  | 490        | 51.56           | 40.445       | -204.74253919 | -205.66153666 | -205.70051219 |
| c-hono | FC | 2        | 1 | 24              | 18                  | 59         | 0.017           | 0.015        | -204.66044196 | -205.22580096 | -205.24706589 |
| c-hono | FC | 3        | 1 | 24              | 18                  | 143        | 0.275           | 0.239        | -204.72351915 | -205.41384855 | -205.44731527 |
| c-hono | FC | 4        | 1 | 24              | 18                  | 282        | 2.755           | 2.239        | -204.73886108 | -205.46675446 | -205.50305744 |
| c-hono | FC | 5        | 1 | 24              | 18                  | 490        | 38.289          | 33.529       | -204.74253919 | -205.48380792 | -205.52113864 |
| cl2    | CV | 2        | 1 | 34              | 14                  | 54         | 0.027           | 0.022        | -918.96547262 | -919.57541556 | -919.58561213 |
| cl2    | CV | 3        | 1 | 34              | 14                  | 118        | 0.31            | 0.233        | -919.00165471 | -920.02115669 | -920.04501812 |
| cl2    | CV | 4        | 1 | 34              | 14                  | 218        | 2.595           | 1.378        | -919.00917320 | -920.21511260 | -920.24363481 |
| cl2    | CV | 5        | 1 | 34              | 14                  | 362        | 15.382          | 7.351        | -919.01038800 | -920.29578998 | -920.32577726 |
| cl2    | FC | 2        | 1 | 34              | 14                  | 54         | 0.005           | 0.005        | -918.96547262 | -919.27597290 | -919.28357580 |
| cl2    | FC | 3        | 1 | 34              | 14                  | 118        | 0.073           | 0.067        | -919.00165471 | -919.42052699 | -919.43915265 |
| cl2    | FC | 4        | 1 | 34              | 14                  | 218        | 0.624           | 0.534        | -919.00917320 | -919.46178169 | -919.48377604 |
| cl2    | FC | 5        | 1 | 34              | 14                  | 362        | 3.922           | 3.333        | -919.01038800 | -919.47337412 | -919.49639772 |

| System | CV | Cardinal | M | N <sub>el</sub> | N <sub>val,el</sub> | Basis size | Time SD(T), min | Time SD, min | HF            | CCSD          | CCSD(T)       |
|--------|----|----------|---|-----------------|---------------------|------------|-----------------|--------------|---------------|---------------|---------------|
| clcn   | CV | 2        | 1 | 30              | 16                  | 63         | 0.037           | 0.032        | -551.79327128 | -552.44827312 | -552.46819220 |
| clcn   | CV | 3        | 1 | 30              | 16                  | 145        | 0.549           | 0.402        | -551.83322431 | -552.78055207 | -552.81356146 |
| clcn   | CV | 4        | 1 | 30              | 16                  | 277        | 4.916           | 2.895        | -551.84191601 | -552.90802300 | -552.94454374 |
| clcn   | CV | 5        | 1 | 30              | 16                  | 471        | 84.904          | 69.21        | -551.84356342 | -552.95765536 | -552.99532321 |
| clcn   | FC | 2        | 1 | 30              | 16                  | 63         | 0.012           | 0.011        | -551.79327128 | -552.23790317 | -552.25610633 |
| clcn   | FC | 3        | 1 | 30              | 16                  | 145        | 0.177           | 0.154        | -551.83322431 | -552.38194117 | -552.41144367 |
| clcn   | FC | 4        | 1 | 30              | 16                  | 277        | 1.811           | 1.491        | -551.84191601 | -552.42180141 | -552.45404649 |
| clcn   | FC | 5        | 1 | 30              | 16                  | 471        | 43.766          | 41.293       | -551.84356342 | -552.43364985 | -552.46679397 |
| clf    | CV | 2        | 1 | 26              | 14                  | 45         | 0.014           | 0.013        | -558.84792732 | -559.38601784 | -559.39521433 |
| clf    | CV | 3        | 1 | 26              | 14                  | 102        | 0.14            | 0.117        | -558.90328560 | -559.73149157 | -559.75194367 |
| clf    | CV | 4        | 1 | 26              | 14                  | 193        | 1.064           | 0.751        | -558.91653886 | -559.86311454 | -559.88714425 |
| clf    | CV | 5        | 1 | 26              | 14                  | 326        | 7.186           | 4.708        | -558.91962671 | -559.91474993 | -559.93997725 |
| clf    | FC | 2        | 1 | 26              | 14                  | 45         | 0.005           | 0.004        | -558.84792732 | -559.20543709 | -559.21317344 |
| clf    | FC | 3        | 1 | 26              | 14                  | 102        | 0.052           | 0.047        | -558.90328560 | -559.37647941 | -559.39393855 |
| clf    | FC | 4        | 1 | 26              | 14                  | 193        | 0.431           | 0.377        | -558.91653886 | -559.42517640 | -559.44550027 |
| clf    | FC | 5        | 1 | 26              | 14                  | 326        | 2.942           | 2.542        | -558.91962671 | -559.44034578 | -559.46163070 |
| clo    | CV | 2        | 2 | 25              | 13                  | 45         | 0.034           | 0.025        | -534.26045464 | -534.76349051 | -534.77356814 |
| clo    | CV | 3        | 2 | 25              | 13                  | 102        | 0.714           | 0.604        | -534.30642296 | -535.08200030 | -535.10309789 |
| clo    | CV | 4        | 2 | 25              | 13                  | 193        | 9.572           | 7.91         | -534.31635341 | -535.20430502 | -535.22885119 |
| clo    | CV | 5        | 2 | 25              | 13                  | 326        | 93.705          | 77.606       | -534.31861331 | -535.25296117 | -535.27866586 |
| clo    | FC | 2        | 2 | 25              | 13                  | 45         | 0.014           | 0.013        | -534.26045464 | -534.58334506 | -534.59192298 |
| clo    | FC | 3        | 2 | 25              | 13                  | 102        | 0.491           | 0.463        | -534.30642296 | -534.72947065 | -534.74747855 |
| clo    | FC | 4        | 2 | 25              | 13                  | 193        | 7.129           | 6.823        | -534.31635341 | -534.76929544 | -534.79002256 |
| clo    | FC | 5        | 2 | 25              | 13                  | 326        | 74.554          | 72.042       | -534.31861331 | -534.78162882 | -534.80327187 |
| cn     | CV | 2        | 2 | 13              | 9                   | 36         | 0.013           | 0.012        | -92.21375638  | -92.54343833  | -92.55715274  |
| cn     | CV | 3        | 2 | 13              | 9                   | 86         | 0.313           | 0.293        | -92.19260241  | -92.60809382  | -92.62739551  |
| cn     | CV | 4        | 2 | 13              | 9                   | 168        | 4.716           | 4.503        | -92.19700024  | -92.63497408  | -92.65502713  |
| cn     | CV | 5        | 2 | 13              | 9                   | 290        | 49.635          | 47.873       | -92.20816397  | -92.65653202  | -92.67693278  |
| cn     | FC | 2        | 2 | 13              | 9                   | 36         | 0.01            | 0.009        | -92.21375638  | -92.48365773  | -92.49685952  |
| cn     | FC | 3        | 2 | 13              | 9                   | 86         | 0.277           | 0.266        | -92.19260241  | -92.51096727  | -92.52927158  |
| cn     | FC | 4        | 2 | 13              | 9                   | 168        | 4.363           | 4.262        | -92.19700024  | -92.52653083  | -92.54548389  |
| cn     | FC | 5        | 2 | 13              | 9                   | 290        | 46.941          | 46.222       | -92.20816397  | -92.54473905  | -92.56401697  |
| c-n2h2 | CV | 2        | 1 | 16              | 12                  | 46         | 0.007           | 0.007        | -109.99748235 | -110.41608391 | -110.42934315 |
| c-n2h2 | CV | 3        | 1 | 16              | 12                  | 114        | 0.104           | 0.093        | -110.02927179 | -110.55659398 | -110.57742559 |

| System | CV | Cardinal | M | N <sub>el</sub> | N <sub>val_el</sub> | Basis size | Time SD(T), min | Time SD, min | HF            | CCSD          | CCSD(T)       |
|--------|----|----------|---|-----------------|---------------------|------------|-----------------|--------------|---------------|---------------|---------------|
| c-n2h2 | CV | 4        | 1 | 16              | 12                  | 228        | 0.955           | 0.774        | -110.03743494 | -110.59588308 | -110.61840615 |
| c-n2h2 | CV | 5        | 1 | 16              | 12                  | 400        | 7.772           | 6.294        | -110.03942886 | -110.60789702 | -110.63100808 |
| c-n2h2 | FC | 2        | 1 | 16              | 12                  | 46         | 0.005           | 0.004        | -109.99748235 | -110.35524891 | -110.36807176 |
| c-n2h2 | FC | 3        | 1 | 16              | 12                  | 114        | 0.072           | 0.067        | -110.02927179 | -110.45659825 | -110.47648258 |
| c-n2h2 | FC | 4        | 1 | 16              | 12                  | 228        | 0.847           | 0.766        | -110.03743494 | -110.48436454 | -110.50581019 |
| c-n2h2 | FC | 5        | 1 | 16              | 12                  | 400        | 6.695           | 6.062        | -110.03942886 | -110.49308714 | -110.51508984 |
| co     | CV | 2        | 1 | 14              | 10                  | 36         | 0.004           | 0.003        | -112.74982522 | -113.11313762 | -113.12507272 |
| co     | CV | 3        | 1 | 14              | 10                  | 86         | 0.035           | 0.032        | -112.78123530 | -113.24596225 | -113.26442563 |
| co     | CV | 4        | 1 | 14              | 10                  | 168        | 0.3             | 0.262        | -112.78873241 | -113.28348814 | -113.30334795 |
| co     | CV | 5        | 1 | 14              | 10                  | 290        | 1.99            | 1.703        | -112.79035975 | -113.29500239 | -113.31533030 |
| co     | FC | 2        | 1 | 14              | 10                  | 36         | 0.002           | 0.002        | -112.74982522 | -113.05300830 | -113.06455638 |
| co     | FC | 3        | 1 | 14              | 10                  | 86         | 0.024           | 0.022        | -112.78123530 | -113.14623147 | -113.16381413 |
| co     | FC | 4        | 1 | 14              | 10                  | 168        | 0.262           | 0.247        | -112.78873241 | -113.17211164 | -113.19096293 |
| co     | FC | 5        | 1 | 14              | 10                  | 290        | 1.961           | 1.851        | -112.79035975 | -113.18023823 | -113.19952658 |
| co2    | CV | 2        | 1 | 22              | 16                  | 54         | 0.017           | 0.014        | -187.65177136 | -188.23560721 | -188.25558799 |
| co2    | CV | 3        | 1 | 22              | 16                  | 129        | 0.221           | 0.183        | -187.70829915 | -188.46404202 | -188.49484434 |
| co2    | CV | 4        | 1 | 22              | 16                  | 252        | 2.277           | 1.659        | -187.72160976 | -188.52885405 | -188.56213438 |
| co2    | CV | 5        | 1 | 22              | 16                  | 435        | 16.866          | 11.775       | -187.72458802 | -188.54890379 | -188.58302476 |
| co2    | FC | 2        | 1 | 22              | 16                  | 54         | 0.009           | 0.008        | -187.65177136 | -188.14420679 | -188.16362186 |
| co2    | FC | 3        | 1 | 22              | 16                  | 129        | 0.135           | 0.119        | -187.70829915 | -188.31102719 | -188.34052418 |
| co2    | FC | 4        | 1 | 22              | 16                  | 252        | 1.297           | 1.054        | -187.72160976 | -188.35797388 | -188.38975109 |
| co2    | FC | 5        | 1 | 22              | 16                  | 435        | 9.728           | 7.778        | -187.72458802 | -188.37281368 | -188.40538261 |
| cs     | CV | 2        | 1 | 22              | 10                  | 45         | 0.012           | 0.011        | -435.33407383 | -435.77998013 | -435.79702124 |
| cs     | CV | 3        | 1 | 22              | 10                  | 102        | 0.114           | 0.099        | -435.35552709 | -436.01908956 | -436.04447933 |
| cs     | CV | 4        | 1 | 22              | 10                  | 193        | 0.917           | 0.682        | -435.36088764 | -436.12225900 | -436.15007087 |
| cs     | CV | 5        | 1 | 22              | 10                  | 326        | 5.756           | 4.14         | -435.36181555 | -436.16410638 | -436.19272744 |
| cs     | FC | 2        | 1 | 22              | 10                  | 45         | 0.003           | 0.003        | -435.33407383 | -435.60140142 | -435.61663988 |
| cs     | FC | 3        | 1 | 22              | 10                  | 102        | 0.04            | 0.038        | -435.35552709 | -435.67890009 | -435.70085526 |
| cs     | FC | 4        | 1 | 22              | 10                  | 193        | 0.43            | 0.402        | -435.36088764 | -435.70042955 | -435.72403154 |
| cs     | FC | 5        | 1 | 22              | 10                  | 326        | 3.144           | 2.98         | -435.36181555 | -435.70679138 | -435.73094459 |
| cs2    | CV | 2        | 1 | 38              | 16                  | 72         | 0.077           | 0.062        | -832.93497425 | -833.67925709 | -833.70672157 |
| cs2    | CV | 3        | 1 | 38              | 16                  | 161        | 1.187           | 0.736        | -832.97270605 | -834.12051961 | -834.16264109 |
| cs2    | CV | 4        | 1 | 38              | 16                  | 302        | 10.99           | 5.315        | -832.98095724 | -834.31526474 | -834.36188286 |
| cs2    | CV | 5        | 1 | 38              | 16                  | 507        | 78.478          | 35.491       | -832.98225534 | -834.39527251 | -834.44333743 |

| System    | CV | Cardinal | M | N <sub>el</sub> | N <sub>val,el</sub> | Basis size | Time SD(T), min | Time SD, min | HF            | CCSD          | CCSD(T)       |
|-----------|----|----------|---|-----------------|---------------------|------------|-----------------|--------------|---------------|---------------|---------------|
| cs2       | FC | 2        | 1 | 38              | 16                  | 72         | 0.014           | 0.012        | -832.93497425 | -833.35050732 | -833.37476733 |
| cs2       | FC | 3        | 1 | 38              | 16                  | 161        | 0.22            | 0.186        | -832.97270605 | -833.48598560 | -833.52200755 |
| cs2       | FC | 4        | 1 | 38              | 16                  | 302        | 2.281           | 1.845        | -832.98095724 | -833.52286781 | -833.56193034 |
| cs2       | FC | 5        | 1 | 38              | 16                  | 507        | 21.267          | 17.936       | -832.98225534 | -833.53349576 | -833.57351681 |
| dioxirane | CV | 2        | 1 | 24              | 18                  | 64         | 0.031           | 0.027        | -188.61775918 | -189.25044884 | -189.26982890 |
| dioxirane | CV | 3        | 1 | 24              | 18                  | 157        | 0.552           | 0.423        | -188.67825961 | -189.49160093 | -189.52316326 |
| dioxirane | CV | 4        | 1 | 24              | 18                  | 312        | 5.766           | 3.981        | -188.69160552 | -189.55753713 | -189.59199230 |
| dioxirane | CV | 5        | 1 | 24              | 18                  | 545        | 58.17           | 40.441       | -188.69503694 | -189.57847726 | -189.61394500 |
| dioxirane | FC | 2        | 1 | 24              | 18                  | 64         | 0.019           | 0.017        | -188.61775918 | -189.15928479 | -189.17802959 |
| dioxirane | FC | 3        | 1 | 24              | 18                  | 157        | 0.363           | 0.303        | -188.67825961 | -189.33941016 | -189.36956892 |
| dioxirane | FC | 4        | 1 | 24              | 18                  | 312        | 3.767           | 3.001        | -188.69160552 | -189.38765733 | -189.42050662 |
| dioxirane | FC | 5        | 1 | 24              | 18                  | 545        | 40.861          | 33.24        | -188.69503694 | -189.40344265 | -189.43725419 |
| f2        | CV | 2        | 1 | 18              | 14                  | 36         | 0.006           | 0.005        | -198.68616632 | -199.16592302 | -199.17634038 |
| f2        | CV | 3        | 1 | 18              | 14                  | 86         | 0.046           | 0.04         | -198.75273797 | -199.40081275 | -199.42053187 |
| f2        | CV | 4        | 1 | 18              | 14                  | 168        | 0.421           | 0.347        | -198.76860094 | -199.46630985 | -199.48861417 |
| f2        | CV | 5        | 1 | 18              | 14                  | 290        | 2.777           | 2.205        | -198.77298571 | -199.48790184 | -199.51115611 |
| f2        | FC | 2        | 1 | 18              | 14                  | 36         | 0.004           | 0.004        | -198.68616632 | -199.10442428 | -199.11444235 |
| f2        | FC | 3        | 1 | 18              | 14                  | 86         | 0.034           | 0.031        | -198.75273797 | -199.29161413 | -199.31043135 |
| f2        | FC | 4        | 1 | 18              | 14                  | 168        | 0.308           | 0.271        | -198.76860094 | -199.34396848 | -199.36523040 |
| f2        | FC | 5        | 1 | 18              | 14                  | 290        | 2.077           | 1.8          | -198.77298571 | -199.36170130 | -199.38387699 |
| f2co      | CV | 2        | 1 | 32              | 24                  | 72         | 0.061           | 0.05         | -311.63481755 | -312.46166235 | -312.48122846 |
| f2co      | CV | 3        | 1 | 32              | 24                  | 172        | 0.962           | 0.618        | -311.73865810 | -312.84086490 | -312.87595886 |
| f2co      | CV | 4        | 1 | 32              | 24                  | 336        | 12.149          | 6.802        | -311.76256462 | -312.94722149 | -312.98614998 |
| f2co      | CV | 5        | 1 | 32              | 24                  | 580        | 119.631         | 74.674       | -311.76863532 | -312.98127495 | -313.02154491 |
| f2co      | FC | 2        | 1 | 32              | 24                  | 72         | 0.033           | 0.028        | -311.63481755 | -312.33888981 | -312.35778558 |
| f2co      | FC | 3        | 1 | 32              | 24                  | 172        | 0.578           | 0.428        | -311.73865810 | -312.63081150 | -312.66431937 |
| f2co      | FC | 4        | 1 | 32              | 24                  | 336        | 7.717           | 5.423        | -311.76256462 | -312.71235153 | -312.74943839 |
| f2co      | FC | 5        | 1 | 32              | 24                  | 580        | 83.211          | 63.994       | -311.76863532 | -312.73914829 | -312.77751273 |
| fccf      | CV | 2        | 1 | 30              | 22                  | 72         | 0.058           | 0.048        | -274.47873450 | -275.24749307 | -275.26802161 |
| fccf      | CV | 3        | 1 | 30              | 22                  | 172        | 0.932           | 0.62         | -274.56842984 | -275.58402364 | -275.61863669 |
| fccf      | CV | 4        | 1 | 30              | 22                  | 336        | 9.506           | 5.281        | -274.58887931 | -275.67821172 | -275.71609606 |
| fccf      | CV | 5        | 1 | 30              | 22                  | 580        | 340.656         | 300.335      | -274.59426586 | -275.70819657 | -275.74721468 |
| fccf      | FC | 2        | 1 | 30              | 22                  | 72         | 0.032           | 0.028        | -274.47873450 | -275.12501427 | -275.14479698 |
| fccf      | FC | 3        | 1 | 30              | 22                  | 172        | 0.568           | 0.441        | -274.56842984 | -275.37781469 | -275.41073417 |



| System | CV | Cardinal | M | N <sub>el</sub> | N <sub>val,el</sub> | Basis size | Time SD(T), min | Time SD, min | HF            | CCSD          | CCSD(T)       |
|--------|----|----------|---|-----------------|---------------------|------------|-----------------|--------------|---------------|---------------|---------------|
| fccf   | FC | 4        | 1 | 30              | 22                  | 336        | 5.979           | 4.307        | -274.58887931 | -275.44780413 | -275.48373638 |
| fccf   | FC | 5        | 1 | 30              | 22                  | 580        | 151.67          | 135.647      | -274.59426586 | -275.47073768 | -275.50773976 |
| formic | CV | 2        | 1 | 24              | 18                  | 64         | 0.031           | 0.027        | -188.78270782 | -189.39918345 | -189.41612977 |
| formic | CV | 3        | 1 | 24              | 18                  | 157        | 0.54            | 0.417        | -188.84223441 | -189.64022768 | -189.66865315 |
| formic | CV | 4        | 1 | 24              | 18                  | 312        | 5.438           | 3.845        | -188.85638369 | -189.70780858 | -189.73890770 |
| formic | CV | 5        | 1 | 24              | 18                  | 545        | 268.693         | 251.465      | -188.85981427 | -189.72882200 | -189.76083205 |
| formic | FC | 2        | 1 | 24              | 18                  | 64         | 0.019           | 0.017        | -188.78270782 | -189.30761026 | -189.32400619 |
| formic | FC | 3        | 1 | 24              | 18                  | 157        | 0.348           | 0.296        | -188.84223441 | -189.48725426 | -189.51442296 |
| formic | FC | 4        | 1 | 24              | 18                  | 312        | 3.613           | 2.927        | -188.85638369 | -189.53703134 | -189.56668250 |
| formic | FC | 5        | 1 | 24              | 18                  | 545        | 205.733         | 198.387      | -188.85981427 | -189.55285452 | -189.58336946 |
| h2cn   | CV | 2        | 2 | 15              | 11                  | 46         | 0.028           | 0.024        | -93.44159502  | -93.79137745  | -93.80156569  |
| h2cn   | CV | 3        | 2 | 15              | 11                  | 114        | 1.034           | 0.966        | -93.46678875  | -93.91122795  | -93.92730496  |
| h2cn   | CV | 4        | 2 | 15              | 11                  | 228        | 16.869          | 15.924       | -93.47286484  | -93.94399800  | -93.96142414  |
| h2cn   | CV | 5        | 2 | 15              | 11                  | 400        | 226.739         | 218.729      | -93.47424835  | -93.95377266  | -93.97164650  |
| h2cn   | FC | 2        | 2 | 15              | 11                  | 46         | 0.021           | 0.019        | -93.44159502  | -93.73094996  | -93.74072841  |
| h2cn   | FC | 3        | 2 | 15              | 11                  | 114        | 0.969           | 0.931        | -93.46678875  | -93.81330944  | -93.82851173  |
| h2cn   | FC | 4        | 2 | 15              | 11                  | 228        | 16.356          | 15.916       | -93.47286484  | -93.83482832  | -93.85125719  |
| h2cn   | FC | 5        | 2 | 15              | 11                  | 400        | 223.23          | 219.713      | -93.47424835  | -93.84137406  | -93.85822161  |
| h2co   | CV | 2        | 1 | 16              | 12                  | 46         | 0.008           | 0.007        | -113.87673443 | -114.27762717 | -114.28872966 |
| h2co   | CV | 3        | 1 | 16              | 12                  | 114        | 0.103           | 0.092        | -113.91231152 | -114.42438340 | -114.44241344 |
| h2co   | CV | 4        | 1 | 16              | 12                  | 228        | 1.042           | 0.861        | -113.92083610 | -114.46525391 | -114.48486843 |
| h2co   | CV | 5        | 1 | 16              | 12                  | 400        | 35.871          | 34.395       | -113.92290844 | -114.47779510 | -114.49794121 |
| h2co   | FC | 2        | 1 | 16              | 12                  | 46         | 0.005           | 0.005        | -113.87673443 | -114.21692407 | -114.22762978 |
| h2co   | FC | 3        | 1 | 16              | 12                  | 114        | 0.072           | 0.066        | -113.91231152 | -114.32408202 | -114.34123665 |
| h2co   | FC | 4        | 1 | 16              | 12                  | 228        | 0.789           | 0.71         | -113.92083610 | -114.35331615 | -114.37192824 |
| h2co   | FC | 5        | 1 | 16              | 12                  | 400        | 22.987          | 22.353       | -113.92290844 | -114.36247337 | -114.38158611 |
| h2o    | CV | 2        | 1 | 10              | 8                   | 28         | 0.002           | 0.002        | -76.02709961  | -76.27470052  | -76.27834035  |
| h2o    | CV | 3        | 1 | 10              | 8                   | 71         | 0.013           | 0.012        | -76.05720230  | -76.38174526  | -76.39011097  |
| h2o    | CV | 4        | 1 | 10              | 8                   | 144        | 0.147           | 0.139        | -76.06482317  | -76.41154498  | -76.42112412  |
| h2o    | CV | 5        | 1 | 10              | 8                   | 255        | 1.209           | 1.131        | -76.06701628  | -76.42105304  | -76.43108083  |
| h2o    | FC | 2        | 1 | 10              | 8                   | 28         | 0.001           | 0.001        | -76.02709961  | -76.24387407  | -76.24736385  |
| h2o    | FC | 3        | 1 | 10              | 8                   | 71         | 0.01            | 0.01         | -76.05720230  | -76.32901652  | -76.33702037  |
| h2o    | FC | 4        | 1 | 10              | 8                   | 144        | 0.127           | 0.122        | -76.06482317  | -76.35263424  | -76.36178932  |
| h2o    | FC | 5        | 1 | 10              | 8                   | 255        | 1.011           | 0.97         | -76.06701628  | -76.36033548  | -76.36992267  |

| System | CV | Cardinal | M | N <sub>el</sub> | N <sub>val,el</sub> | Basis size | Time SD(T), min | Time SD, min | HF            | CCSD          | CCSD(T)       |
|--------|----|----------|---|-----------------|---------------------|------------|-----------------|--------------|---------------|---------------|---------------|
| h2s    | CV | 2        | 1 | 18              | 8                   | 37         | 0.005           | 0.004        | -398.69849904 | -399.01916468 | -399.02425747 |
| h2s    | CV | 3        | 1 | 18              | 8                   | 87         | 0.044           | 0.038        | -398.71552087 | -399.22629047 | -399.23713040 |
| h2s    | CV | 4        | 1 | 18              | 8                   | 169        | 0.391           | 0.31         | -398.71931111 | -399.31908778 | -399.33186998 |
| h2s    | CV | 5        | 1 | 18              | 8                   | 291        | 2.43            | 1.837        | -398.71999409 | -399.35732771 | -399.37069845 |
| h2s    | FC | 2        | 1 | 18              | 8                   | 37         | 0.002           | 0.002        | -398.69849904 | -398.86965744 | -398.87340914 |
| h2s    | FC | 3        | 1 | 18              | 8                   | 87         | 0.017           | 0.016        | -398.71552087 | -398.93267805 | -398.94092352 |
| h2s    | FC | 4        | 1 | 18              | 8                   | 169        | 0.2             | 0.191        | -398.71931111 | -398.94925918 | -398.95876992 |
| h2s    | FC | 5        | 1 | 18              | 8                   | 291        | 1.493           | 1.433        | -398.71999409 | -398.95359238 | -398.96346208 |
| hccf   | CV | 2        | 1 | 22              | 16                  | 59         | 0.02            | 0.017        | -175.65772888 | -176.21094611 | -176.22739113 |
| hccf   | CV | 3        | 1 | 22              | 16                  | 143        | 0.299           | 0.246        | -175.71367450 | -176.43241291 | -176.45873121 |
| hccf   | CV | 4        | 1 | 22              | 16                  | 282        | 3.409           | 2.486        | -175.72594713 | -176.49350694 | -176.52203867 |
| hccf   | CV | 5        | 1 | 22              | 16                  | 490        | 31.307          | 22.487       | -175.72902808 | -176.51257164 | -176.54184620 |
| hccf   | FC | 2        | 1 | 22              | 16                  | 59         | 0.011           | 0.01         | -175.65772888 | -176.11959777 | -176.13545445 |
| hccf   | FC | 3        | 1 | 22              | 16                  | 143        | 0.179           | 0.158        | -175.71367450 | -176.28127555 | -176.30628971 |
| hccf   | FC | 4        | 1 | 22              | 16                  | 282        | 1.937           | 1.575        | -175.72594713 | -176.32476871 | -176.35180505 |
| hccf   | FC | 5        | 1 | 22              | 16                  | 490        | 19.699          | 16.279       | -175.72902808 | -176.33871903 | -176.36645168 |
| hcl    | CV | 2        | 1 | 18              | 8                   | 32         | 0.005           | 0.004        | -460.09159444 | -460.41138582 | -460.41549367 |
| hcl    | CV | 3        | 1 | 18              | 8                   | 73         | 0.025           | 0.022        | -460.10811350 | -460.63571086 | -460.64640468 |
| hcl    | CV | 4        | 1 | 18              | 8                   | 139        | 0.202           | 0.17         | -460.11193755 | -460.73314066 | -460.74604194 |
| hcl    | CV | 5        | 1 | 18              | 8                   | 236        | 1.227           | 0.933        | -460.11259652 | -460.77334449 | -460.78691254 |
| hcl    | FC | 2        | 1 | 18              | 8                   | 32         | 0.001           | 0.001        | -460.09159444 | -460.26150170 | -460.26442962 |
| hcl    | FC | 3        | 1 | 18              | 8                   | 73         | 0.01            | 0.009        | -460.10811350 | -460.33509130 | -460.34335063 |
| hcl    | FC | 4        | 1 | 18              | 8                   | 139        | 0.092           | 0.088        | -460.11193755 | -460.35610043 | -460.36593590 |
| hcl    | FC | 5        | 1 | 18              | 8                   | 236        | 0.67            | 0.641        | -460.11259652 | -460.36173564 | -460.37202463 |
| hcn    | CV | 2        | 1 | 14              | 10                  | 41         | 0.005           | 0.005        | -92.88421938  | -93.24438602  | -93.25750234  |
| hcn    | CV | 3        | 1 | 14              | 10                  | 100        | 0.057           | 0.052        | -92.90867558  | -93.36108705  | -93.38051959  |
| hcn    | CV | 4        | 1 | 14              | 10                  | 198        | 0.536           | 0.46         | -92.91417058  | -93.39316473  | -93.41391140  |
| hcn    | CV | 5        | 1 | 14              | 10                  | 345        | 3.545           | 3.021        | -92.91535676  | -93.40283268  | -93.42401342  |
| hcn    | FC | 2        | 1 | 14              | 10                  | 41         | 0.003           | 0.003        | -92.88421938  | -93.18396623  | -93.19664523  |
| hcn    | FC | 3        | 1 | 14              | 10                  | 100        | 0.04            | 0.038        | -92.90867558  | -93.26301036  | -93.28149200  |
| hcn    | FC | 4        | 1 | 14              | 10                  | 198        | 0.481           | 0.451        | -92.91417058  | -93.28377718  | -93.30344115  |
| hcn    | FC | 5        | 1 | 14              | 10                  | 345        | 3.943           | 3.746        | -92.91535676  | -93.29019807  | -93.31026472  |
| hcnh   | CV | 2        | 2 | 15              | 11                  | 46         | 0.028           | 0.024        | -93.41076423  | -93.77359352  | -93.78531173  |
| hcnh   | CV | 3        | 2 | 15              | 11                  | 114        | 0.981           | 0.913        | -93.43762733  | -93.89584288  | -93.91392291  |

| System | CV | Cardinal | M | N <sub>el</sub> | N <sub>val,el</sub> | Basis size | Time SD(T), min | Time SD, min | HF            | CCSD          | CCSD(T)       |
|--------|----|----------|---|-----------------|---------------------|------------|-----------------|--------------|---------------|---------------|---------------|
| hcnh   | CV | 4        | 2 | 15              | 11                  | 228        | 16.88           | 15.935       | -93.44417648  | -93.92960320  | -93.94911217  |
| hcnh   | CV | 5        | 2 | 15              | 11                  | 400        | 224.53          | 216.569      | -93.44575919  | -93.93979754  | -93.95978751  |
| hcnh   | FC | 2        | 2 | 15              | 11                  | 46         | 0.022           | 0.02         | -93.41076423  | -93.71310754  | -93.72441768  |
| hcnh   | FC | 3        | 2 | 15              | 11                  | 114        | 0.921           | 0.884        | -93.43762733  | -93.79787470  | -93.81507397  |
| hcnh   | FC | 4        | 2 | 15              | 11                  | 228        | 15.474          | 15.031       | -93.44417648  | -93.82038196  | -93.83888732  |
| hcnh   | FC | 5        | 2 | 15              | 11                  | 400        | 222.445         | 218.93       | -93.44575919  | -93.82734876  | -93.84630604  |
| hcnno  | CV | 2        | 1 | 22              | 16                  | 59         | 0.022           | 0.019        | -167.64476919 | -168.23799763 | -168.26213557 |
| hcnno  | CV | 3        | 1 | 22              | 16                  | 143        | 0.333           | 0.28         | -167.69519636 | -168.44953504 | -168.48482217 |
| hcnno  | CV | 4        | 1 | 22              | 16                  | 282        | 3.602           | 2.675        | -167.70697827 | -168.50876697 | -168.54654114 |
| hcnno  | CV | 5        | 1 | 22              | 16                  | 490        | 34.445          | 25.593       | -167.70986261 | -168.52706471 | -168.56567989 |
| hcnno  | FC | 2        | 1 | 22              | 16                  | 59         | 0.012           | 0.011        | -167.64476919 | -168.14638226 | -168.16986808 |
| hcnno  | FC | 3        | 1 | 22              | 16                  | 143        | 0.203           | 0.182        | -167.69519636 | -168.29849299 | -168.33233584 |
| hcnno  | FC | 4        | 1 | 22              | 16                  | 282        | 2.059           | 1.695        | -167.70697827 | -168.34025897 | -168.37638263 |
| hcnno  | FC | 5        | 1 | 22              | 16                  | 490        | 20.763          | 17.32        | -167.70986261 | -168.35350768 | -168.39042214 |
| hco    | CV | 2        | 2 | 15              | 11                  | 41         | 0.018           | 0.016        | -113.25935573 | -113.63446835 | -113.64609899 |
| hco    | CV | 3        | 2 | 15              | 11                  | 100        | 0.58            | 0.54         | -113.29324073 | -113.77420412 | -113.79266208 |
| hco    | CV | 4        | 2 | 15              | 11                  | 198        | 9.198           | 8.614        | -113.30151459 | -113.81351867 | -113.83351299 |
| hco    | CV | 5        | 2 | 15              | 11                  | 345        | 116.429         | 111.595      | -113.30347967 | -113.82562745 | -113.84614315 |
| hco    | FC | 2        | 2 | 15              | 11                  | 41         | 0.014           | 0.013        | -113.25935573 | -113.57402265 | -113.58527415 |
| hco    | FC | 3        | 2 | 15              | 11                  | 100        | 0.532           | 0.509        | -113.29324073 | -113.67412124 | -113.69172068 |
| hco    | FC | 4        | 2 | 15              | 11                  | 198        | 8.815           | 8.533        | -113.30151459 | -113.70179695 | -113.72080647 |
| hco    | FC | 5        | 2 | 15              | 11                  | 345        | 114.852         | 112.743      | -113.30347967 | -113.71052271 | -113.73002288 |
| hf     | CV | 2        | 1 | 10              | 8                   | 23         | 0.001           | 0.001        | -100.01957043 | -100.26530501 | -100.26781083 |
| hf     | CV | 3        | 1 | 10              | 8                   | 57         | 0.006           | 0.006        | -100.05809030 | -100.39348710 | -100.40057515 |
| hf     | CV | 4        | 1 | 10              | 8                   | 114        | 0.059           | 0.056        | -100.06771445 | -100.42983280 | -100.43824519 |
| hf     | CV | 5        | 1 | 10              | 8                   | 200        | 0.496           | 0.465        | -100.07042315 | -100.44163931 | -100.45055090 |
| hf     | FC | 2        | 1 | 10              | 8                   | 23         | 0.001           | 0.001        | -100.01957043 | -100.23424979 | -100.23663197 |
| hf     | FC | 3        | 1 | 10              | 8                   | 57         | 0.005           | 0.005        | -100.05809030 | -100.33844012 | -100.34520494 |
| hf     | FC | 4        | 1 | 10              | 8                   | 114        | 0.052           | 0.05         | -100.06771445 | -100.36818037 | -100.37620737 |
| hf     | FC | 5        | 1 | 10              | 8                   | 200        | 0.382           | 0.366        | -100.07042315 | -100.37804771 | -100.38655739 |
| hnc    | CV | 2        | 1 | 14              | 10                  | 41         | 0.005           | 0.005        | -92.86704566  | -93.21979823  | -93.23236135  |
| hnc    | CV | 3        | 1 | 14              | 10                  | 100        | 0.06            | 0.055        | -92.89293638  | -93.33765847  | -93.35637714  |
| hnc    | CV | 4        | 1 | 14              | 10                  | 198        | 0.567           | 0.491        | -92.89866508  | -93.36982462  | -93.38986804  |
| hnc    | CV | 5        | 1 | 14              | 10                  | 345        | 3.756           | 3.234        | -92.89991900  | -93.37947382  | -93.39995672  |

| System | CV | Cardinal | M | N <sub>el</sub> | N <sub>val,el</sub> | Basis size | Time SD(T), min | Time SD, min | HF            | CCSD          | CCSD(T)       |
|--------|----|----------|---|-----------------|---------------------|------------|-----------------|--------------|---------------|---------------|---------------|
| hnc    | FC | 2        | 1 | 14              | 10                  | 41         | 0.003           | 0.003        | -92.86704566  | -93.15944347  | -93.17160287  |
| hnc    | FC | 3        | 1 | 14              | 10                  | 100        | 0.043           | 0.041        | -92.89293638  | -93.23981761  | -93.25764538  |
| hnc    | FC | 4        | 1 | 14              | 10                  | 198        | 0.51            | 0.481        | -92.89866508  | -93.26070883  | -93.27973694  |
| hnc    | FC | 5        | 1 | 14              | 10                  | 345        | 3.935           | 3.736        | -92.89991900  | -93.26712219  | -93.28656045  |
| hnco   | CV | 2        | 1 | 22              | 16                  | 59         | 0.021           | 0.019        | -167.77970556 | -168.35306401 | -168.37370449 |
| hnco   | CV | 3        | 1 | 22              | 16                  | 143        | 0.337           | 0.282        | -167.83019260 | -168.56543205 | -168.59649049 |
| hnco   | CV | 4        | 1 | 22              | 16                  | 282        | 3.803           | 2.844        | -167.84199967 | -168.62490629 | -168.65833234 |
| hnco   | CV | 5        | 1 | 22              | 16                  | 490        | 34.54           | 25.546       | -167.84470380 | -168.64314922 | -168.67737477 |
| hnco   | FC | 2        | 1 | 22              | 16                  | 59         | 0.012           | 0.011        | -167.77970556 | -168.26155675 | -168.28161737 |
| hnco   | FC | 3        | 1 | 22              | 16                  | 143        | 0.202           | 0.18         | -167.83019260 | -168.41446564 | -168.44421569 |
| hnco   | FC | 4        | 1 | 22              | 16                  | 282        | 2.161           | 1.781        | -167.84199967 | -168.45645447 | -168.48837838 |
| hnco   | FC | 5        | 1 | 22              | 16                  | 490        | 21.951          | 18.43        | -167.84470380 | -168.46964206 | -168.50231842 |
| hnnn   | CV | 2        | 1 | 22              | 16                  | 59         | 0.023           | 0.02         | -163.85612333 | -164.46048711 | -164.48597171 |
| hnnn   | CV | 3        | 1 | 22              | 16                  | 143        | 0.356           | 0.3          | -163.90360047 | -164.66483187 | -164.70160098 |
| hnnn   | CV | 4        | 1 | 22              | 16                  | 282        | 3.961           | 2.999        | -163.91454413 | -164.72145357 | -164.76072437 |
| hnnn   | CV | 5        | 1 | 22              | 16                  | 490        | 36.244          | 27.239       | -163.91714821 | -164.73883619 | -164.77896735 |
| hnnn   | FC | 2        | 1 | 22              | 16                  | 59         | 0.013           | 0.012        | -163.85612333 | -164.36893744 | -164.39376324 |
| hnnn   | FC | 3        | 1 | 22              | 16                  | 143        | 0.204           | 0.182        | -163.90360047 | -164.51432284 | -164.54963634 |
| hnnn   | FC | 4        | 1 | 22              | 16                  | 282        | 2.304           | 1.926        | -163.91454413 | -164.55360405 | -164.59121436 |
| hnnn   | FC | 5        | 1 | 22              | 16                  | 490        | 23.187          | 19.692       | -163.91714821 | -164.56603384 | -164.60445548 |
| hno    | CV | 2        | 1 | 16              | 12                  | 41         | 0.007           | 0.006        | -129.79859830 | -130.22983367 | -130.24312901 |
| hno    | CV | 3        | 1 | 16              | 12                  | 100        | 0.073           | 0.066        | -129.83693568 | -130.38848642 | -130.40996167 |
| hno    | CV | 4        | 1 | 16              | 12                  | 198        | 0.667           | 0.554        | -129.84680617 | -130.43336514 | -130.45673914 |
| hno    | CV | 5        | 1 | 16              | 12                  | 345        | 4.604           | 3.8          | -129.84926223 | -130.44740545 | -130.47145361 |
| hno    | FC | 2        | 1 | 16              | 12                  | 41         | 0.005           | 0.004        | -129.79859830 | -130.16899838 | -130.18185837 |
| hno    | FC | 3        | 1 | 16              | 12                  | 100        | 0.052           | 0.048        | -129.83693568 | -130.28633548 | -130.30684948 |
| hno    | FC | 4        | 1 | 16              | 12                  | 198        | 0.548           | 0.499        | -129.84680617 | -130.31932020 | -130.34159730 |
| hno    | FC | 5        | 1 | 16              | 12                  | 345        | 4.112           | 3.761        | -129.84926223 | -130.32992018 | -130.35283828 |
| hocl   | CV | 2        | 1 | 26              | 14                  | 50         | 0.019           | 0.016        | -534.87646793 | -535.41700870 | -535.42738033 |
| hocl   | CV | 3        | 1 | 26              | 14                  | 116        | 0.241           | 0.201        | -534.92190370 | -535.74022293 | -535.76217368 |
| hocl   | CV | 4        | 1 | 26              | 14                  | 223        | 2.08            | 1.417        | -534.93201648 | -535.86444475 | -535.88988455 |
| hocl   | CV | 5        | 1 | 26              | 14                  | 381        | 14.426          | 9.719        | -534.93431188 | -535.91352126 | -535.94010294 |
| hocl   | FC | 2        | 1 | 26              | 14                  | 50         | 0.006           | 0.006        | -534.87646793 | -535.23662264 | -535.24551400 |
| hocl   | FC | 3        | 1 | 26              | 14                  | 116        | 0.09            | 0.083        | -534.92190370 | -535.38748208 | -535.40639806 |

| System | CV | Cardinal | M | N <sub>el</sub> | N <sub>val,el</sub> | Basis size | Time SD(T), min | Time SD, min | HF            | CCSD          | CCSD(T)       |
|--------|----|----------|---|-----------------|---------------------|------------|-----------------|--------------|---------------|---------------|---------------|
| hocl   | FC | 4        | 1 | 26              | 14                  | 223        | 0.791           | 0.681        | -534.93201648 | -535.42920324 | -535.45089192 |
| hocl   | FC | 5        | 1 | 26              | 14                  | 381        | 6.083           | 5.316        | -534.93431188 | -535.44194209 | -535.46453542 |
| hocn   | CV | 2        | 1 | 22              | 16                  | 59         | 0.022           | 0.019        | -167.74146899 | -168.31791039 | -168.33662001 |
| hocn   | CV | 3        | 1 | 22              | 16                  | 143        | 0.317           | 0.263        | -167.79082824 | -168.52890547 | -168.55842264 |
| hocn   | CV | 4        | 1 | 22              | 16                  | 282        | 3.628           | 2.668        | -167.80227141 | -168.58761351 | -168.61947943 |
| hocn   | CV | 5        | 1 | 22              | 16                  | 490        | 32.973          | 23.961       | -167.80490885 | -168.60563601 | -168.63829036 |
| hocn   | FC | 2        | 1 | 22              | 16                  | 59         | 0.012           | 0.011        | -167.74146899 | -168.22657099 | -168.24467595 |
| hocn   | FC | 3        | 1 | 22              | 16                  | 143        | 0.179           | 0.157        | -167.79082824 | -168.37811430 | -168.40628121 |
| hocn   | FC | 4        | 1 | 22              | 16                  | 282        | 2.074           | 1.697        | -167.80227141 | -168.41935204 | -168.44967184 |
| hocn   | FC | 5        | 1 | 22              | 16                  | 490        | 20.778          | 17.287       | -167.80490885 | -168.43232303 | -168.46338382 |
| hof    | CV | 2        | 1 | 18              | 14                  | 41         | 0.008           | 0.007        | -174.74540843 | -175.21832296 | -175.22854863 |
| hof    | CV | 3        | 1 | 18              | 14                  | 100        | 0.091           | 0.082        | -174.80461298 | -175.43460023 | -175.45421716 |
| hof    | CV | 4        | 1 | 18              | 14                  | 198        | 0.837           | 0.682        | -174.81859709 | -175.49454421 | -175.51664866 |
| hof    | CV | 5        | 1 | 18              | 14                  | 345        | 6.046           | 5.002        | -174.82241761 | -175.51410163 | -175.53711441 |
| hof    | FC | 2        | 1 | 18              | 14                  | 41         | 0.005           | 0.005        | -174.74540843 | -175.15695502 | -175.16680670 |
| hof    | FC | 3        | 1 | 18              | 14                  | 100        | 0.064           | 0.059        | -174.80461298 | -175.32761903 | -175.34636912 |
| hof    | FC | 4        | 1 | 18              | 14                  | 198        | 0.615           | 0.54         | -174.81859709 | -175.37484463 | -175.39594531 |
| hof    | FC | 5        | 1 | 18              | 14                  | 345        | 4.532           | 4.023        | -174.82241761 | -175.39067507 | -175.41264875 |
| honc   | CV | 2        | 1 | 22              | 16                  | 59         | 0.021           | 0.019        | -167.64652840 | -168.22482406 | -168.24400274 |
| honc   | CV | 3        | 1 | 22              | 16                  | 143        | 0.334           | 0.281        | -167.69557753 | -168.43376819 | -168.46391614 |
| honc   | CV | 4        | 1 | 22              | 16                  | 282        | 3.764           | 2.809        | -167.70670971 | -168.49159808 | -168.52417740 |
| honc   | CV | 5        | 1 | 22              | 16                  | 490        | 34.522          | 25.487       | -167.70931421 | -168.50938284 | -168.54278447 |
| honc   | FC | 2        | 1 | 22              | 16                  | 59         | 0.012           | 0.011        | -167.64652840 | -168.13379296 | -168.15236117 |
| honc   | FC | 3        | 1 | 22              | 16                  | 143        | 0.205           | 0.182        | -167.69557753 | -168.28357858 | -168.31235798 |
| honc   | FC | 4        | 1 | 22              | 16                  | 282        | 2.203           | 1.824        | -167.70670971 | -168.32401056 | -168.35502571 |
| honc   | FC | 5        | 1 | 22              | 16                  | 490        | 21.954          | 18.433       | -167.70931421 | -168.33676483 | -168.36855502 |
| hoo    | CV | 2        | 2 | 17              | 13                  | 41         | 0.02            | 0.017        | -150.18817990 | -150.62275759 | -150.63261287 |
| hoo    | CV | 3        | 2 | 17              | 13                  | 100        | 0.585           | 0.534        | -150.23723627 | -150.80955006 | -150.82817113 |
| hoo    | CV | 4        | 2 | 17              | 13                  | 198        | 9.266           | 8.495        | -150.24895183 | -150.86115943 | -150.88198682 |
| hoo    | CV | 5        | 2 | 17              | 13                  | 345        | 104.494         | 98.229       | -150.25203341 | -150.87761735 | -150.89923763 |
| hoo    | FC | 2        | 2 | 17              | 13                  | 41         | 0.015           | 0.013        | -150.18817990 | -150.56173392 | -150.57122938 |
| hoo    | FC | 3        | 2 | 17              | 13                  | 100        | 0.535           | 0.505        | -150.23723627 | -150.70495837 | -150.72273247 |
| hoo    | FC | 4        | 2 | 17              | 13                  | 198        | 8.841           | 8.443        | -150.24895183 | -150.74428445 | -150.76413266 |
| hoo    | FC | 5        | 2 | 17              | 13                  | 345        | 109.124         | 106.044      | -150.25203341 | -150.75714858 | -150.77775680 |

| System   | CV | Cardinal | M | N <sub>el</sub> | N <sub>val,el</sub> | Basis size | Time SD(T), min | Time SD, min | HF            | CCSD          | CCSD(T)       |
|----------|----|----------|---|-----------------|---------------------|------------|-----------------|--------------|---------------|---------------|---------------|
| hooh     | CV | 2        | 1 | 18              | 14                  | 46         | 0.009           | 0.009        | -150.78486673 | -151.25755010 | -151.26804920 |
| hooh     | CV | 3        | 1 | 18              | 14                  | 114        | 0.135           | 0.12         | -150.83651146 | -151.45409727 | -151.47415205 |
| hooh     | CV | 4        | 1 | 18              | 14                  | 228        | 1.303           | 1.027        | -150.84853298 | -151.50799917 | -151.53040970 |
| hooh     | CV | 5        | 1 | 18              | 14                  | 400        | 9.961           | 7.703        | -150.85173426 | -151.52526890 | -151.54852442 |
| hooh     | FC | 2        | 1 | 18              | 14                  | 46         | 0.006           | 0.006        | -150.78486673 | -151.19632569 | -151.20644789 |
| hooh     | FC | 3        | 1 | 18              | 14                  | 114        | 0.096           | 0.088        | -150.83651146 | -151.34932916 | -151.36851013 |
| hooh     | FC | 4        | 1 | 18              | 14                  | 228        | 0.948           | 0.814        | -150.84853298 | -151.39093476 | -151.41233545 |
| hooh     | FC | 5        | 1 | 18              | 14                  | 400        | 7.301           | 6.211        | -150.85173426 | -151.40460824 | -151.42681868 |
| hs       | CV | 2        | 2 | 17              | 7                   | 32         | 0.008           | 0.006        | -398.09119821 | -398.37840741 | -398.38221956 |
| hs       | CV | 3        | 2 | 17              | 7                   | 73         | 0.141           | 0.122        | -398.10649618 | -398.57837952 | -398.58734665 |
| hs       | CV | 4        | 2 | 17              | 7                   | 139        | 1.855           | 1.683        | -398.11007778 | -398.66898326 | -398.67972458 |
| hs       | CV | 5        | 2 | 17              | 7                   | 236        | 15.717          | 14.222       | -398.11068097 | -398.70661746 | -398.71788942 |
| hs       | FC | 2        | 2 | 17              | 7                   | 32         | 0.004           | 0.004        | -398.09119821 | -398.22898835 | -398.23155544 |
| hs       | FC | 3        | 2 | 17              | 7                   | 73         | 0.099           | 0.095        | -398.10649618 | -398.28502933 | -398.29150112 |
| hs       | FC | 4        | 2 | 17              | 7                   | 139        | 1.557           | 1.523        | -398.11007778 | -398.29940397 | -398.30697858 |
| hs       | FC | 5        | 2 | 17              | 7                   | 236        | 13.702          | 13.501       | -398.11068097 | -398.30312609 | -398.31100384 |
| ketene   | CV | 2        | 1 | 22              | 16                  | 64         | 0.028           | 0.025        | -151.74128554 | -152.29451512 | -152.31326609 |
| ketene   | CV | 3        | 1 | 22              | 16                  | 157        | 0.465           | 0.37         | -151.78548188 | -152.49001076 | -152.51846030 |
| ketene   | CV | 4        | 1 | 22              | 16                  | 312        | 5.088           | 3.733        | -151.79562551 | -152.54416093 | -152.57475752 |
| ketene   | CV | 5        | 1 | 22              | 16                  | 545        | 53.842          | 40.083       | -151.79795599 | -152.56056378 | -152.59186047 |
| ketene   | FC | 2        | 1 | 22              | 16                  | 64         | 0.016           | 0.015        | -151.74128554 | -152.20344024 | -152.22159840 |
| ketene   | FC | 3        | 1 | 22              | 16                  | 157        | 0.263           | 0.225        | -151.78548188 | -152.34132682 | -152.36847637 |
| ketene   | FC | 4        | 1 | 22              | 16                  | 312        | 2.935           | 2.403        | -151.79562551 | -152.37831971 | -152.40742788 |
| ketene   | FC | 5        | 1 | 22              | 16                  | 545        | 32.242          | 26.904       | -151.79795599 | -152.38974354 | -152.41950646 |
| methanol | CV | 2        | 1 | 18              | 14                  | 56         | 0.015           | 0.013        | -115.04994684 | -115.48168833 | -115.49046052 |
| methanol | CV | 3        | 1 | 18              | 14                  | 142        | 0.222           | 0.185        | -115.08985356 | -115.64306150 | -115.65912801 |
| methanol | CV | 4        | 1 | 18              | 14                  | 288        | 2.74            | 2.13         | -115.09905296 | -115.68703366 | -115.70482796 |
| methanol | CV | 5        | 1 | 18              | 14                  | 510        | 28.476          | 22.321       | -115.10150732 | -115.70061202 | -115.71898645 |
| methanol | FC | 2        | 1 | 18              | 14                  | 56         | 0.009           | 0.008        | -115.04994684 | -115.42060906 | -115.42903416 |
| methanol | FC | 3        | 1 | 18              | 14                  | 142        | 0.164           | 0.146        | -115.08985356 | -115.54243718 | -115.55772731 |
| methanol | FC | 4        | 1 | 18              | 14                  | 288        | 2.011           | 1.714        | -115.09905296 | -115.57478731 | -115.59168483 |
| methanol | FC | 5        | 1 | 18              | 14                  | 510        | 21.906          | 18.997       | -115.10150732 | -115.58498673 | -115.60243455 |
| n2       | CV | 2        | 1 | 14              | 10                  | 36         | 0.004           | 0.003        | -108.95469995 | -109.33277194 | -109.34596562 |
| n2       | CV | 3        | 1 | 14              | 10                  | 86         | 0.032           | 0.029        | -108.98410388 | -109.46252568 | -109.48266166 |

| System | CV | Cardinal | M | N <sub>el</sub> | N <sub>val,el</sub> | Basis size | Time SD(T), min | Time SD, min | HF            | CCSD          | CCSD(T)       |
|--------|----|----------|---|-----------------|---------------------|------------|-----------------|--------------|---------------|---------------|---------------|
| n2     | CV | 4        | 1 | 14              | 10                  | 168        | 0.277           | 0.239        | -108.99094690 | -109.49824894 | -109.51983428 |
| n2     | CV | 5        | 1 | 14              | 10                  | 290        | 1.857           | 1.57         | -108.99250225 | -109.50933691 | -109.53142448 |
| n2     | FC | 2        | 1 | 14              | 10                  | 36         | 0.002           | 0.002        | -108.95469995 | -109.27222578 | -109.28499101 |
| n2     | FC | 3        | 1 | 14              | 10                  | 86         | 0.026           | 0.025        | -108.98410388 | -109.36252288 | -109.38170159 |
| n2     | FC | 4        | 1 | 14              | 10                  | 168        | 0.244           | 0.228        | -108.99094690 | -109.38665665 | -109.40714845 |
| n2     | FC | 5        | 1 | 14              | 10                  | 290        | 1.81            | 1.701        | -108.99250225 | -109.39443505 | -109.41539616 |
| n2h    | CV | 2        | 2 | 15              | 11                  | 41         | 0.019           | 0.017        | -109.43853948 | -109.82036564 | -109.83246610 |
| n2h    | CV | 3        | 2 | 15              | 11                  | 100        | 0.609           | 0.569        | -109.46843392 | -109.95446391 | -109.97370055 |
| n2h    | CV | 4        | 2 | 15              | 11                  | 198        | 9.681           | 9.087        | -109.47607444 | -109.99192933 | -110.01278762 |
| n2h    | CV | 5        | 2 | 15              | 11                  | 345        | 109.701         | 104.949      | -109.47791043 | -110.00346462 | -110.02489331 |
| n2h    | FC | 2        | 2 | 15              | 11                  | 41         | 0.015           | 0.013        | -109.43853948 | -109.75962255 | -109.77130468 |
| n2h    | FC | 3        | 2 | 15              | 11                  | 100        | 0.528           | 0.506        | -109.46843392 | -109.85440097 | -109.87271442 |
| n2h    | FC | 4        | 2 | 15              | 11                  | 198        | 9.297           | 9.015        | -109.47607444 | -109.88031563 | -109.90012003 |
| n2h    | FC | 5        | 2 | 15              | 11                  | 345        | 108.184         | 106.052      | -109.47791043 | -109.88855386 | -109.90889742 |
| n2h4   | CV | 2        | 1 | 18              | 14                  | 56         | 0.014           | 0.013        | -111.18743189 | -111.63093013 | -111.64076778 |
| n2h4   | CV | 3        | 1 | 18              | 14                  | 142        | 0.234           | 0.198        | -111.22481877 | -111.78885326 | -111.80659335 |
| n2h4   | CV | 4        | 1 | 18              | 14                  | 288        | 2.754           | 2.144        | -111.23370929 | -111.83195393 | -111.85154225 |
| n2h4   | CV | 5        | 1 | 18              | 14                  | 510        | 28.472          | 22.322       | -111.23614990 | -111.84528879 | -111.86552053 |
| n2h4   | FC | 2        | 1 | 18              | 14                  | 56         | 0.009           | 0.008        | -111.18743189 | -111.56946307 | -111.57893910 |
| n2h4   | FC | 3        | 1 | 18              | 14                  | 142        | 0.174           | 0.156        | -111.22481877 | -111.68810921 | -111.70503793 |
| n2h4   | FC | 4        | 1 | 18              | 14                  | 288        | 2.021           | 1.725        | -111.23370929 | -111.71965304 | -111.73830688 |
| n2h4   | FC | 5        | 1 | 18              | 14                  | 510        | 21.954          | 19.018       | -111.23614990 | -111.72969073 | -111.74895752 |
| n2o    | CV | 2        | 1 | 22              | 16                  | 54         | 0.019           | 0.017        | -183.69644357 | -184.31435516 | -184.34054288 |
| n2o    | CV | 3        | 1 | 22              | 16                  | 129        | 0.234           | 0.197        | -183.75045452 | -184.53601172 | -184.57394939 |
| n2o    | CV | 4        | 1 | 22              | 16                  | 252        | 2.391           | 1.774        | -183.76286629 | -184.59790815 | -184.63848107 |
| n2o    | CV | 5        | 1 | 22              | 16                  | 435        | 17.022          | 12.072       | -183.76577025 | -184.61710773 | -184.65858485 |
| n2o    | FC | 2        | 1 | 22              | 16                  | 54         | 0.01            | 0.01         | -183.69644357 | -184.22277725 | -184.24831253 |
| n2o    | FC | 3        | 1 | 22              | 16                  | 129        | 0.143           | 0.127        | -183.75045452 | -184.38336181 | -184.41983356 |
| n2o    | FC | 4        | 1 | 22              | 16                  | 252        | 1.385           | 1.142        | -183.76286629 | -184.42754430 | -184.46644152 |
| n2o    | FC | 5        | 1 | 22              | 16                  | 435        | 10.333          | 8.394        | -183.76577025 | -184.44163789 | -184.48138840 |
| nccn   | CV | 2        | 1 | 26              | 18                  | 72         | 0.053           | 0.046        | -184.60515939 | -185.29951095 | -185.32895605 |
| nccn   | CV | 3        | 1 | 26              | 18                  | 172        | 0.817           | 0.602        | -184.64945196 | -185.52287967 | -185.56512043 |
| nccn   | CV | 4        | 1 | 26              | 18                  | 336        | 8.53            | 5.685        | -184.65955806 | -185.58488414 | -185.62977203 |
| nccn   | CV | 5        | 1 | 26              | 18                  | 580        | 81.79           | 53.103       | -184.66169514 | -185.60355527 | -185.64932085 |

| System | CV | Cardinal | M | N <sub>el</sub> | N <sub>val,el</sub> | Basis size | Time SD(T), min | Time SD, min | HF            | CCSD          | CCSD(T)       |
|--------|----|----------|---|-----------------|---------------------|------------|-----------------|--------------|---------------|---------------|---------------|
| nccn   | FC | 2        | 1 | 26              | 18                  | 72         | 0.027           | 0.024        | -184.60515939 | -185.17845794 | -185.20699904 |
| nccn   | FC | 3        | 1 | 26              | 18                  | 172        | 0.449           | 0.375        | -184.64945196 | -185.32666238 | -185.36695628 |
| nccn   | FC | 4        | 1 | 26              | 18                  | 336        | 4.74            | 3.778        | -184.65955806 | -185.36607683 | -185.40875089 |
| nccn   | FC | 5        | 1 | 26              | 18                  | 580        | 47.754          | 38.127       | -184.66169514 | -185.37825944 | -185.42174714 |
| nh     | CV | 2        | 3 | 8               | 6                   | 23         | 0.003           | 0.003        | -54.96678733  | -55.12392871  | -55.12574741  |
| nh     | CV | 3        | 3 | 8               | 6                   | 57         | 0.049           | 0.046        | -54.98135995  | -55.18943047  | -55.19370728  |
| nh     | CV | 4        | 3 | 8               | 6                   | 114        | 0.838           | 0.814        | -54.98516282  | -55.20659643  | -55.21150324  |
| nh     | CV | 5        | 3 | 8               | 6                   | 200        | 8.556           | 8.4          | -54.98616465  | -55.21176113  | -55.21687654  |
| nh     | FC | 2        | 3 | 8               | 6                   | 23         | 0.003           | 0.002        | -54.96678733  | -55.09383012  | -55.09552122  |
| nh     | FC | 3        | 3 | 8               | 6                   | 57         | 0.045           | 0.043        | -54.98135995  | -55.13974186  | -55.14371136  |
| nh     | FC | 4        | 3 | 8               | 6                   | 114        | 0.784           | 0.769        | -54.98516282  | -55.15115953  | -55.15570812  |
| nh     | FC | 5        | 3 | 8               | 6                   | 200        | 8.121           | 8.028        | -54.98616465  | -55.15468506  | -55.15943012  |
| nh2    | CV | 2        | 2 | 9               | 7                   | 28         | 0.004           | 0.004        | -55.56753183  | -55.76449416  | -55.76753015  |
| nh2    | CV | 3        | 2 | 9               | 7                   | 71         | 0.118           | 0.112        | -55.58616808  | -55.84086695  | -55.84707214  |
| nh2    | CV | 4        | 2 | 9               | 7                   | 144        | 2.044           | 1.984        | -55.59070168  | -55.86114273  | -55.86814667  |
| nh2    | CV | 5        | 2 | 9               | 7                   | 255        | 21.672          | 21.199       | -55.59197549  | -55.86736260  | -55.87464467  |
| nh2    | FC | 2        | 2 | 9               | 7                   | 28         | 0.004           | 0.004        | -55.56753183  | -55.73408663  | -55.73697053  |
| nh2    | FC | 3        | 2 | 9               | 7                   | 71         | 0.111           | 0.107        | -55.58616808  | -55.79085034  | -55.79670594  |
| nh2    | FC | 4        | 2 | 9               | 7                   | 144        | 1.978           | 1.938        | -55.59070168  | -55.80535679  | -55.81195535  |
| nh2    | FC | 5        | 2 | 9               | 7                   | 255        | 21.666          | 21.381       | -55.59197549  | -55.80993190  | -55.81679470  |
| nh2cl  | CV | 2        | 1 | 26              | 14                  | 55         | 0.024           | 0.021        | -515.07554218 | -515.60322242 | -515.61373433 |
| nh2cl  | CV | 3        | 1 | 26              | 14                  | 130        | 0.313           | 0.248        | -515.11109662 | -515.90384958 | -515.92517887 |
| nh2cl  | CV | 4        | 1 | 26              | 14                  | 253        | 3.297           | 2.242        | -515.11879500 | -516.02177451 | -516.04634388 |
| nh2cl  | CV | 5        | 1 | 26              | 14                  | 436        | 24.387          | 15.238       | -515.12047116 | -516.06860068 | -516.09421478 |
| nh2cl  | FC | 2        | 1 | 26              | 14                  | 55         | 0.008           | 0.007        | -515.07554218 | -515.42280735 | -515.43185953 |
| nh2cl  | FC | 3        | 1 | 26              | 14                  | 130        | 0.129           | 0.118        | -515.11109662 | -515.55324617 | -515.57157886 |
| nh2cl  | FC | 4        | 1 | 26              | 14                  | 253        | 1.29            | 1.117        | -515.11879500 | -515.58905106 | -515.60991482 |
| nh2cl  | FC | 5        | 1 | 26              | 14                  | 436        | 9.794           | 8.33         | -515.12047116 | -515.59968636 | -515.62136047 |
| nh3    | CV | 2        | 1 | 10              | 8                   | 33         | 0.002           | 0.002        | -56.19628184  | -56.43312912  | -56.43743168  |
| nh3    | CV | 3        | 1 | 10              | 8                   | 85         | 0.022           | 0.021        | -56.21806819  | -56.51892417  | -56.52719313  |
| nh3    | CV | 4        | 1 | 10              | 8                   | 174        | 0.314           | 0.294        | -56.22315396  | -56.54169318  | -56.55092162  |
| nh3    | CV | 5        | 1 | 10              | 8                   | 310        | 2.577           | 2.423        | -56.22471044  | -56.54879934  | -56.55836084  |
| nh3    | FC | 2        | 1 | 10              | 8                   | 33         | 0.002           | 0.002        | -56.19628184  | -56.40232098  | -56.40645803  |
| nh3    | FC | 3        | 1 | 10              | 8                   | 85         | 0.019           | 0.018        | -56.21806819  | -56.46841580  | -56.47631410  |



| System | CV | Cardinal | M | N <sub>el</sub> | N <sub>val_el</sub> | Basis size | Time SD(T), min | Time SD, min | HF            | CCSD          | CCSD(T)       |
|--------|----|----------|---|-----------------|---------------------|------------|-----------------|--------------|---------------|---------------|---------------|
| nh3    | FC | 4        | 1 | 10              | 8                   | 174        | 0.234           | 0.224        | -56.22315396  | -56.48538251  | -56.49418212  |
| nh3    | FC | 5        | 1 | 10              | 8                   | 310        | 2.116           | 2.034        | -56.22471044  | -56.49083489  | -56.49995310  |
| no     | CV | 2        | 2 | 15              | 11                  | 36         | 0.012           | 0.01         | -129.26064587 | -129.65748401 | -129.66987554 |
| no     | CV | 3        | 2 | 15              | 11                  | 86         | 0.302           | 0.276        | -129.29706368 | -129.80857089 | -129.82862547 |
| no     | CV | 4        | 2 | 15              | 11                  | 168        | 4.389           | 4.108        | -129.30640634 | -129.85121992 | -129.87302075 |
| no     | CV | 5        | 2 | 15              | 11                  | 290        | 49.762          | 47.021       | -129.30859489 | -129.86449979 | -129.88691337 |
| no     | FC | 2        | 2 | 15              | 11                  | 36         | 0.009           | 0.008        | -129.26064587 | -129.59677553 | -129.60876832 |
| no     | FC | 3        | 2 | 15              | 11                  | 86         | 0.268           | 0.254        | -129.29706368 | -129.70642756 | -129.72557436 |
| no     | FC | 4        | 2 | 15              | 11                  | 168        | 4.182           | 4.04         | -129.30640634 | -129.73716285 | -129.75792209 |
| no     | FC | 5        | 2 | 15              | 11                  | 290        | 48.233          | 47.039       | -129.30859489 | -129.74699716 | -129.76833654 |
| no2    | CV | 2        | 2 | 23              | 17                  | 54         | 0.059           | 0.046        | -204.04866295 | -204.68732663 | -204.71317983 |
| no2    | CV | 3        | 2 | 23              | 17                  | 129        | 1.82            | 1.577        | -204.11065286 | -204.93165900 | -204.97008972 |
| no2    | CV | 4        | 2 | 23              | 17                  | 252        | 26.819          | 22.425       | -204.12603822 | -205.00116088 | -205.04258829 |
| no2    | CV | 5        | 2 | 23              | 17                  | 435        | 341.037         | 305.162      | -204.12965669 | -205.02290669 | -205.06539646 |
| no2    | FC | 2        | 2 | 23              | 17                  | 54         | 0.04            | 0.034        | -204.04866295 | -204.59579589 | -204.62103841 |
| no2    | FC | 3        | 2 | 23              | 17                  | 129        | 1.535           | 1.417        | -204.11065286 | -204.77699592 | -204.81402736 |
| no2    | FC | 4        | 2 | 23              | 17                  | 252        | 23.102          | 21.225       | -204.12603822 | -204.82845770 | -204.86827741 |
| no2    | FC | 5        | 2 | 23              | 17                  | 435        | 307.133         | 292.451      | -204.12965669 | -204.84496261 | -204.88579333 |
| o2     | CV | 2        | 3 | 16              | 12                  | 36         | 0.01            | 0.008        | -149.62845140 | -150.04859551 | -150.05960042 |
| o2     | CV | 3        | 3 | 16              | 12                  | 86         | 0.26            | 0.232        | -149.67594295 | -150.22524647 | -150.24464795 |
| o2     | CV | 4        | 3 | 16              | 12                  | 168        | 3.861           | 3.521        | -149.68778107 | -150.27456531 | -150.29599157 |
| o2     | CV | 5        | 3 | 16              | 12                  | 290        | 40.665          | 37.346       | -149.69078755 | -150.29014142 | -150.31228833 |
| o2     | FC | 2        | 3 | 16              | 12                  | 36         | 0.007           | 0.006        | -149.62845140 | -149.98772887 | -149.99837312 |
| o2     | FC | 3        | 3 | 16              | 12                  | 86         | 0.227           | 0.211        | -149.67594295 | -150.12072989 | -150.13928732 |
| o2     | FC | 4        | 3 | 16              | 12                  | 168        | 3.517           | 3.345        | -149.68778107 | -150.15776330 | -150.17821330 |
| o2     | FC | 5        | 3 | 16              | 12                  | 290        | 38.399          | 36.892       | -149.69078755 | -150.16974252 | -150.19088065 |
| ocs    | CV | 2        | 1 | 30              | 16                  | 63         | 0.035           | 0.03         | -510.29553122 | -510.95898935 | -510.98230889 |
| ocs    | CV | 3        | 1 | 30              | 16                  | 145        | 0.547           | 0.399        | -510.34292372 | -511.29419513 | -511.33014856 |
| ocs    | CV | 4        | 1 | 30              | 16                  | 277        | 4.945           | 2.922        | -510.35372952 | -511.42373471 | -511.46313926 |
| ocs    | CV | 5        | 1 | 30              | 16                  | 471        | 37.617          | 21.919       | -510.35591384 | -511.47372375 | -511.51425259 |
| ocs    | FC | 2        | 1 | 30              | 16                  | 63         | 0.011           | 0.01         | -510.29553122 | -510.74887171 | -510.77036090 |
| ocs    | FC | 3        | 1 | 30              | 16                  | 145        | 0.19            | 0.167        | -510.34292372 | -510.90034306 | -510.93267304 |
| ocs    | FC | 4        | 1 | 30              | 16                  | 277        | 1.819           | 1.5          | -510.35372952 | -510.94201652 | -510.97697638 |
| ocs    | FC | 5        | 1 | 30              | 16                  | 471        | 17.596          | 15.125       | -510.35591384 | -510.95470420 | -510.99052117 |

| System  | CV | Cardinal | M | N <sub>el</sub> | N <sub>val,el</sub> | Basis size | Time SD(T), min | Time SD, min | HF            | CCSD          | CCSD(T)       |
|---------|----|----------|---|-----------------|---------------------|------------|-----------------|--------------|---------------|---------------|---------------|
| oh      | CV | 2        | 2 | 9               | 7                   | 23         | 0.003           | 0.003        | -75.39405456  | -75.59387935  | -75.59604938  |
| oh      | CV | 3        | 2 | 9               | 7                   | 57         | 0.046           | 0.042        | -75.41935241  | -75.68954723  | -75.69525631  |
| oh      | CV | 4        | 2 | 9               | 7                   | 114        | 0.806           | 0.777        | -75.42592785  | -75.71589075  | -75.72258626  |
| oh      | CV | 5        | 2 | 9               | 7                   | 200        | 7.682           | 7.494        | -75.42773139  | -75.72418701  | -75.73123636  |
| oh      | FC | 2        | 2 | 9               | 7                   | 23         | 0.003           | 0.002        | -75.39405456  | -75.56338152  | -75.56542078  |
| oh      | FC | 3        | 2 | 9               | 7                   | 57         | 0.043           | 0.04         | -75.41935241  | -75.63717955  | -75.64256108  |
| oh      | FC | 4        | 2 | 9               | 7                   | 114        | 0.783           | 0.764        | -75.42592785  | -75.65736249  | -75.66367226  |
| oh      | FC | 5        | 2 | 9               | 7                   | 200        | 7.527           | 7.408        | -75.42773139  | -75.66385821  | -75.67050686  |
| oxirene | CV | 2        | 1 | 22              | 16                  | 64         | 0.026           | 0.023        | -151.59525708 | -152.15917485 | -152.17871773 |
| oxirene | CV | 3        | 1 | 22              | 16                  | 157        | 0.46            | 0.365        | -151.64359005 | -152.36136421 | -152.39152463 |
| oxirene | CV | 4        | 1 | 22              | 16                  | 312        | 5.106           | 3.752        | -151.65455928 | -152.41699777 | -152.44958663 |
| oxirene | CV | 5        | 1 | 22              | 16                  | 545        | 51.18           | 37.422       | -151.65751992 | -152.43452824 | -152.46796477 |
| oxirene | FC | 2        | 1 | 22              | 16                  | 64         | 0.016           | 0.014        | -151.59525708 | -152.06835421 | -152.08723817 |
| oxirene | FC | 3        | 1 | 22              | 16                  | 157        | 0.262           | 0.223        | -151.64359005 | -152.21322485 | -152.24195787 |
| oxirene | FC | 4        | 1 | 22              | 16                  | 312        | 2.886           | 2.352        | -151.65455928 | -152.25180108 | -152.28276397 |
| oxirene | FC | 5        | 1 | 22              | 16                  | 545        | 32.527          | 27.142       | -151.65751992 | -152.26438866 | -152.29615070 |
| p2      | CV | 2        | 1 | 30              | 10                  | 54         | 0.026           | 0.022        | -681.47117064 | -682.01564756 | -682.03420002 |
| p2      | CV | 3        | 1 | 30              | 10                  | 118        | 0.265           | 0.205        | -681.49309145 | -682.36872525 | -682.39736758 |
| p2      | CV | 4        | 1 | 30              | 10                  | 218        | 2.061           | 1.186        | -681.49867435 | -682.53732551 | -682.56931885 |
| p2      | CV | 5        | 1 | 30              | 10                  | 362        | 52.487          | 46.823       | -681.49950122 | -682.60928295 | -682.64237924 |
| p2      | FC | 2        | 1 | 30              | 10                  | 54         | 0.004           | 0.003        | -681.47117064 | -681.72028779 | -681.73528910 |
| p2      | FC | 3        | 1 | 30              | 10                  | 118        | 0.057           | 0.054        | -681.49309145 | -681.79168181 | -681.81392857 |
| p2      | FC | 4        | 1 | 30              | 10                  | 218        | 0.59            | 0.553        | -681.49867435 | -681.81222908 | -681.83632827 |
| p2      | FC | 5        | 1 | 30              | 10                  | 362        | 26.127          | 25.896       | -681.49950122 | -681.81794970 | -681.84264426 |
| ph3     | CV | 2        | 1 | 18              | 8                   | 42         | 0.007           | 0.006        | -342.47541533 | -342.78858008 | -342.79387354 |
| ph3     | CV | 3        | 1 | 18              | 8                   | 101        | 0.073           | 0.063        | -342.49071445 | -342.97936685 | -342.98889822 |
| ph3     | CV | 4        | 1 | 18              | 8                   | 199        | 0.713           | 0.545        | -342.49409962 | -343.06604316 | -343.07715424 |
| ph3     | CV | 5        | 1 | 18              | 8                   | 346        | 4.965           | 3.777        | -342.49468276 | -343.10230974 | -343.11391382 |
| ph3     | FC | 2        | 1 | 18              | 8                   | 42         | 0.002           | 0.002        | -342.47541533 | -342.64071383 | -342.64454144 |
| ph3     | FC | 3        | 1 | 18              | 8                   | 101        | 0.028           | 0.027        | -342.49071445 | -342.69032401 | -342.69713489 |
| ph3     | FC | 4        | 1 | 18              | 8                   | 199        | 0.348           | 0.332        | -342.49409962 | -342.70298830 | -342.71065908 |
| ph3     | FC | 5        | 1 | 18              | 8                   | 346        | 3.055           | 2.939        | -342.49468276 | -342.70615351 | -342.71407028 |
| s2      | CV | 2        | 3 | 32              | 12                  | 54         | 0.068           | 0.041        | -795.06802581 | -795.63501922 | -795.64867405 |
| s2      | CV | 3        | 3 | 32              | 12                  | 118        | 1.334           | 0.962        | -795.10124372 | -796.03210960 | -796.05764576 |

| System | CV | Cardinal | M | N <sub>el</sub> | N <sub>val,el</sub> | Basis size | Time SD(T), min | Time SD, min | HF            | CCSD          | CCSD(T)       |
|--------|----|----------|---|-----------------|---------------------|------------|-----------------|--------------|---------------|---------------|---------------|
| s2     | CV | 4        | 3 | 32              | 12                  | 218        | 16.734          | 10.88        | -795.10827566 | -796.21399779 | -796.24358639 |
| s2     | CV | 5        | 3 | 32              | 12                  | 362        | 173.721         | 125.673      | -795.10930328 | -796.29002748 | -796.32090261 |
| s2     | FC | 2        | 3 | 32              | 12                  | 54         | 0.018           | 0.015        | -795.06802581 | -795.33633086 | -795.34712448 |
| s2     | FC | 3        | 3 | 32              | 12                  | 118        | 0.629           | 0.593        | -795.10124372 | -795.44553912 | -795.46556363 |
| s2     | FC | 4        | 3 | 32              | 12                  | 218        | 8.905           | 8.497        | -795.10827566 | -795.47506059 | -795.49775318 |
| s2     | FC | 5        | 3 | 32              | 12                  | 362        | 112.655         | 109.755      | -795.10930328 | -795.48329352 | -795.50680559 |
| sif    | CV | 2        | 2 | 23              | 11                  | 45         | 0.03            | 0.022        | -388.36282106 | -388.80783892 | -388.81529507 |
| sif    | CV | 3        | 2 | 23              | 11                  | 102        | 0.669           | 0.569        | -388.41876786 | -389.10581115 | -389.12050224 |
| sif    | CV | 4        | 2 | 23              | 11                  | 193        | 8.855           | 7.405        | -388.43111437 | -389.21805184 | -389.23519305 |
| sif    | CV | 5        | 2 | 23              | 11                  | 326        | 765.908         | 752.73       | -388.43381833 | -389.26430183 | -389.28228320 |
| sif    | FC | 2        | 2 | 23              | 11                  | 45         | 0.014           | 0.012        | -388.36282106 | -388.63554165 | -388.64135280 |
| sif    | FC | 3        | 2 | 23              | 11                  | 102        | 0.466           | 0.445        | -388.41876786 | -388.76629736 | -388.77776903 |
| sif    | FC | 4        | 2 | 23              | 11                  | 193        | 6.889           | 6.66         | -388.43111437 | -388.80165951 | -388.81472380 |
| sif    | FC | 5        | 2 | 23              | 11                  | 326        | 180.406         | 178.78       | -388.43381833 | -388.81260583 | -388.82621225 |
| sih    | CV | 2        | 2 | 15              | 5                   | 32         | 0.007           | 0.006        | -289.43074621 | -289.66227482 | -289.66558821 |
| sih    | CV | 3        | 2 | 15              | 5                   | 73         | 0.139           | 0.124        | -289.43999144 | -289.82948842 | -289.83549298 |
| sih    | CV | 4        | 2 | 15              | 5                   | 139        | 1.907           | 1.779        | -289.44240633 | -289.90580211 | -289.91296393 |
| sih    | CV | 5        | 2 | 15              | 5                   | 236        | 16.431          | 15.287       | -289.44278780 | -289.94046301 | -289.94799723 |
| sih    | FC | 2        | 2 | 15              | 5                   | 32         | 0.004           | 0.004        | -289.43074621 | -289.52112982 | -289.52288637 |
| sih    | FC | 3        | 2 | 15              | 5                   | 73         | 0.108           | 0.105        | -289.43999144 | -289.54520534 | -289.54828000 |
| sih    | FC | 4        | 2 | 15              | 5                   | 139        | 1.678           | 1.657        | -289.44240633 | -289.55135936 | -289.55480291 |
| sih    | FC | 5        | 2 | 15              | 5                   | 236        | 14.945          | 14.831       | -289.44278780 | -289.55270178 | -289.55623928 |
| sih3f  | CV | 2        | 1 | 26              | 14                  | 60         | 0.03            | 0.026        | -390.17026809 | -390.66762418 | -390.67457089 |
| sih3f  | CV | 3        | 1 | 26              | 14                  | 144        | 0.433           | 0.328        | -390.23227881 | -390.98411445 | -390.99809865 |
| sih3f  | CV | 4        | 1 | 26              | 14                  | 283        | 4.371           | 2.789        | -390.24526969 | -391.10067336 | -391.11709558 |
| sih3f  | CV | 5        | 1 | 26              | 14                  | 491        | 42.297          | 27.837       | -390.24801863 | -391.14773220 | -391.16498383 |
| sih3f  | FC | 2        | 1 | 26              | 14                  | 60         | 0.009           | 0.009        | -390.17026809 | -390.49664023 | -390.50200021 |
| sih3f  | FC | 3        | 1 | 26              | 14                  | 144        | 0.169           | 0.151        | -390.23227881 | -390.64492166 | -390.65591602 |
| sih3f  | FC | 4        | 1 | 26              | 14                  | 283        | 1.773           | 1.51         | -390.24526969 | -390.68449712 | -390.69708743 |
| sih3f  | FC | 5        | 1 | 26              | 14                  | 491        | 20.19           | 17.852       | -390.24801863 | -390.69627424 | -390.70939871 |
| sih4   | CV | 2        | 1 | 18              | 8                   | 47         | 0.008           | 0.007        | -291.24823568 | -291.53633498 | -291.54031975 |
| sih4   | CV | 3        | 1 | 18              | 8                   | 115        | 0.111           | 0.095        | -291.26434112 | -291.72225118 | -291.72876372 |
| sih4   | CV | 4        | 1 | 18              | 8                   | 229        | 1.059           | 0.791        | -291.26791819 | -291.80338705 | -291.81110163 |
| sih4   | CV | 5        | 1 | 18              | 8                   | 401        | 7.999           | 5.842        | -291.26850584 | -291.83910093 | -291.84721036 |

| System | CV | Cardinal | M | N <sub>el</sub> | N <sub>val_el</sub> | Basis size | Time SD(T), min | Time SD, min | HF            | CCSD          | CCSD(T)       |
|--------|----|----------|---|-----------------|---------------------|------------|-----------------|--------------|---------------|---------------|---------------|
| sih4   | FC | 2        | 1 | 18              | 8                   | 47         | 0.003           | 0.003        | -291.24823568 | -291.39626290 | -291.39878119 |
| sih4   | FC | 3        | 1 | 18              | 8                   | 115        | 0.043           | 0.041        | -291.26434112 | -291.43788546 | -291.44174431 |
| sih4   | FC | 4        | 1 | 18              | 8                   | 229        | 0.588           | 0.561        | -291.26791819 | -291.44871848 | -291.45300888 |
| sih4   | FC | 5        | 1 | 18              | 8                   | 401        | 5.121           | 4.916        | -291.26850584 | -291.45111857 | -291.45552874 |
| sio    | CV | 2        | 1 | 22              | 10                  | 45         | 0.012           | 0.011        | -363.79796632 | -364.25521374 | -364.26936846 |
| sio    | CV | 3        | 1 | 22              | 10                  | 102        | 0.121           | 0.104        | -363.84439286 | -364.52533951 | -364.54709762 |
| sio    | CV | 4        | 1 | 22              | 10                  | 193        | 0.934           | 0.71         | -363.85270580 | -364.62853254 | -364.65271800 |
| sio    | CV | 5        | 1 | 22              | 10                  | 326        | 5.897           | 4.36         | -363.85456818 | -364.67220001 | -364.69720455 |
| sio    | FC | 2        | 1 | 22              | 10                  | 45         | 0.003           | 0.003        | -363.79796632 | -364.08354970 | -364.09584146 |
| sio    | FC | 3        | 1 | 22              | 10                  | 102        | 0.043           | 0.041        | -363.84439286 | -364.18798760 | -364.20622085 |
| sio    | FC | 4        | 1 | 22              | 10                  | 193        | 0.447           | 0.424        | -363.85270580 | -364.21458493 | -364.23436690 |
| sio    | FC | 5        | 1 | 22              | 10                  | 326        | 3.287           | 3.13         | -363.85456818 | -364.22302893 | -364.24332437 |
| so     | CV | 2        | 3 | 24              | 12                  | 45         | 0.032           | 0.023        | -472.35701042 | -472.85020055 | -472.86231698 |
| so     | CV | 3        | 3 | 24              | 12                  | 102        | 0.697           | 0.592        | -472.40908258 | -473.14990807 | -473.17206978 |
| so     | CV | 4        | 3 | 24              | 12                  | 193        | 9.243           | 7.722        | -472.41909196 | -473.26615282 | -473.29136006 |
| so     | CV | 5        | 3 | 24              | 12                  | 326        | 89.39           | 74.723       | -472.42137887 | -473.31259316 | -473.33881377 |
| so     | FC | 2        | 3 | 24              | 12                  | 45         | 0.013           | 0.012        | -472.35701042 | -472.67034385 | -472.68091346 |
| so     | FC | 3        | 3 | 24              | 12                  | 102        | 0.473           | 0.448        | -472.40908258 | -472.80415730 | -472.82325406 |
| so     | FC | 4        | 3 | 24              | 12                  | 193        | 6.898           | 6.636        | -472.41909196 | -472.83799617 | -472.85938269 |
| so     | FC | 5        | 3 | 24              | 12                  | 326        | 71.968          | 69.886       | -472.42137887 | -472.84872849 | -472.87087635 |
| so2    | CV | 2        | 1 | 32              | 18                  | 63         | 0.051           | 0.043        | -547.20818289 | -547.94936622 | -547.97302197 |
| so2    | CV | 3        | 1 | 32              | 18                  | 145        | 0.617           | 0.447        | -547.30620454 | -548.36643020 | -548.40487710 |
| so2    | CV | 4        | 1 | 32              | 18                  | 277        | 5.703           | 3.144        | -547.32264954 | -548.51170022 | -548.55441453 |
| so2    | CV | 5        | 1 | 32              | 18                  | 471        | 179.978         | 157.459      | -547.32643682 | -548.56766809 | -548.61183334 |
| so2    | FC | 2        | 1 | 32              | 18                  | 63         | 0.016           | 0.014        | -547.20818289 | -547.73887185 | -547.76062256 |
| so2    | FC | 3        | 1 | 32              | 18                  | 145        | 0.234           | 0.202        | -547.30620454 | -547.96803291 | -548.00272377 |
| so2    | FC | 4        | 1 | 32              | 18                  | 277        | 2.286           | 1.816        | -547.32264954 | -548.02477483 | -548.06287790 |
| so2    | FC | 5        | 1 | 32              | 18                  | 471        | 116.894         | 112.818      | -547.32643682 | -548.04324961 | -548.08252214 |
| ssh    | CV | 2        | 2 | 33              | 13                  | 59         | 0.106           | 0.07         | -795.64030195 | -796.22380160 | -796.23581197 |
| ssh    | CV | 3        | 2 | 33              | 13                  | 132        | 2.518           | 1.932        | -795.67410292 | -796.62821612 | -796.65218750 |
| ssh    | CV | 4        | 2 | 33              | 13                  | 248        | 34.67           | 23.637       | -795.68125690 | -796.81202984 | -796.84009903 |
| ssh    | CV | 5        | 2 | 33              | 13                  | 417        | 354.579         | 268.614      | -795.68239313 | -796.88850384 | -796.91786695 |
| ssh    | FC | 2        | 2 | 33              | 13                  | 59         | 0.032           | 0.029        | -795.64030195 | -795.92493232 | -795.93413708 |
| ssh    | FC | 3        | 2 | 33              | 13                  | 132        | 1.283           | 1.22         | -795.67410292 | -796.04144717 | -796.06000192 |

| System | CV | Cardinal | M | N <sub>el</sub> | N <sub>val_el</sub> | Basis size | Time SD(T), min | Time SD, min | HF            | CCSD          | CCSD(T)       |
|--------|----|----------|---|-----------------|---------------------|------------|-----------------|--------------|---------------|---------------|---------------|
| ssh    | FC | 4        | 2 | 33              | 13                  | 248        | 18.964          | 18.135       | -795.68125690 | -796.07294522 | -796.09422358 |
| ssh    | FC | 5        | 2 | 33              | 13                  | 417        | 232.373         | 226.601      | -795.68239313 | -796.08163679 | -796.10374494 |
| t-hcoh | CV | 2        | 1 | 16              | 12                  | 46         | 0.008           | 0.007        | -113.80067213 | -114.19533520 | -114.20543568 |
| t-hcoh | CV | 3        | 1 | 16              | 12                  | 114        | 0.111           | 0.1          | -113.83599874 | -114.34230316 | -114.35930270 |
| t-hcoh | CV | 4        | 1 | 16              | 12                  | 228        | 1.007           | 0.826        | -113.84454407 | -114.38301755 | -114.40157701 |
| t-hcoh | CV | 5        | 1 | 16              | 12                  | 400        | 7.757           | 6.281        | -113.84674593 | -114.39563917 | -114.41472774 |
| t-hcoh | FC | 2        | 1 | 16              | 12                  | 46         | 0.005           | 0.005        | -113.80067213 | -114.13493531 | -114.14465711 |
| t-hcoh | FC | 3        | 1 | 16              | 12                  | 114        | 0.076           | 0.071        | -113.83599874 | -114.24255550 | -114.25871739 |
| t-hcoh | FC | 4        | 1 | 16              | 12                  | 228        | 0.844           | 0.765        | -113.84454407 | -114.27169692 | -114.28929820 |
| t-hcoh | FC | 5        | 1 | 16              | 12                  | 400        | 6.772           | 6.136        | -113.84674593 | -114.28095403 | -114.29905552 |
| t-hono | CV | 2        | 1 | 24              | 18                  | 59         | 0.03            | 0.026        | -204.65786428 | -205.31536637 | -205.33716294 |
| t-hono | CV | 3        | 1 | 24              | 18                  | 143        | 0.42            | 0.338        | -204.72226548 | -205.56813129 | -205.60303839 |
| t-hono | CV | 4        | 1 | 24              | 18                  | 282        | 4.106           | 2.909        | -204.73794371 | -205.63941518 | -205.67740643 |
| t-hono | CV | 5        | 1 | 24              | 18                  | 490        | 46.628          | 35.463       | -204.74177959 | -205.66188796 | -205.70098269 |
| t-hono | FC | 2        | 1 | 24              | 18                  | 59         | 0.018           | 0.016        | -204.65786428 | -205.22390913 | -205.24508712 |
| t-hono | FC | 3        | 1 | 24              | 18                  | 143        | 0.273           | 0.239        | -204.72226548 | -205.41365887 | -205.44715994 |
| t-hono | FC | 4        | 1 | 24              | 18                  | 282        | 2.762           | 2.248        | -204.73794371 | -205.46691936 | -205.50329865 |
| t-hono | FC | 5        | 1 | 24              | 18                  | 490        | 33.979          | 29.269       | -204.74177959 | -205.48415701 | -205.52158891 |
| t-n2h2 | CV | 2        | 1 | 16              | 12                  | 46         | 0.007           | 0.007        | -110.00728199 | -110.42431138 | -110.43728149 |
| t-n2h2 | CV | 3        | 1 | 16              | 12                  | 114        | 0.103           | 0.093        | -110.03891610 | -110.56514981 | -110.58564640 |
| t-n2h2 | CV | 4        | 1 | 16              | 12                  | 228        | 0.945           | 0.765        | -110.04711970 | -110.60460286 | -110.62678173 |
| t-n2h2 | CV | 5        | 1 | 16              | 12                  | 400        | 7.373           | 5.895        | -110.04925308 | -110.61680670 | -110.63957690 |
| t-n2h2 | FC | 2        | 1 | 16              | 12                  | 46         | 0.005           | 0.005        | -110.00728199 | -110.36342652 | -110.37596560 |
| t-n2h2 | FC | 3        | 1 | 16              | 12                  | 114        | 0.072           | 0.067        | -110.03891610 | -110.46507840 | -110.48463488 |
| t-n2h2 | FC | 4        | 1 | 16              | 12                  | 228        | 0.794           | 0.715        | -110.04711970 | -110.49300464 | -110.51411278 |
| t-n2h2 | FC | 5        | 1 | 16              | 12                  | 400        | 6.362           | 5.729        | -110.04925308 | -110.50191824 | -110.52358634 |
| Al     | CV | 2        | 2 | 13              | 3                   | 27         | 0.004           | 0.004        | -241.87362874 | -242.05154303 | -242.05398614 |
| Al     | CV | 3        | 2 | 13              | 3                   | 59         | 0.056           | 0.049        | -241.87912101 | -242.20744179 | -242.21179111 |
| Al     | CV | 4        | 2 | 13              | 3                   | 109        | 0.681           | 0.635        | -241.88049061 | -242.27928482 | -242.28464784 |
| Al     | CV | 5        | 2 | 13              | 3                   | 181        | 5.333           | 5.026        | -241.88076194 | -242.31402314 | -242.31974610 |
| Al     | FC | 2        | 2 | 13              | 3                   | 27         | 0.002           | 0.002        | -241.87362874 | -241.92124005 | -241.92195972 |
| Al     | FC | 3        | 2 | 13              | 3                   | 59         | 0.038           | 0.038        | -241.87912101 | -241.93042903 | -241.93159650 |
| Al     | FC | 4        | 2 | 13              | 3                   | 109        | 0.543           | 0.539        | -241.88049061 | -241.93276575 | -241.93405735 |
| Al     | FC | 5        | 2 | 13              | 3                   | 181        | 4.526           | 4.504        | -241.88076194 | -241.93326058 | -241.93457803 |

| System | CV | Cardinal | M | N <sub>el</sub> | N <sub>val,el</sub> | Basis size | Time SD(T), min | Time SD, min | HF            | CCSD          | CCSD(T)       |
|--------|----|----------|---|-----------------|---------------------|------------|-----------------|--------------|---------------|---------------|---------------|
| B      | CV | 2        | 2 | 5               | 3                   | 18         | 0.002           | 0.002        | -24.52997268  | -24.61766763  | -24.61872374  |
| B      | CV | 3        | 2 | 5               | 3                   | 43         | 0.015           | 0.014        | -24.53212018  | -24.64097392  | -24.64277540  |
| B      | CV | 4        | 2 | 5               | 3                   | 84         | 0.22            | 0.214        | -24.53298282  | -24.64793794  | -24.64989311  |
| B      | CV | 5        | 2 | 5               | 3                   | 145        | 2.161           | 2.132        | -24.53312788  | -24.64988225  | -24.65188121  |
| B      | FC | 2        | 2 | 5               | 3                   | 18         | 0.002           | 0.002        | -24.52997268  | -24.59012334  | -24.59095343  |
| B      | FC | 3        | 2 | 5               | 3                   | 43         | 0.015           | 0.014        | -24.53212018  | -24.59774997  | -24.59911482  |
| B      | FC | 4        | 2 | 5               | 3                   | 84         | 0.203           | 0.201        | -24.53298282  | -24.59967586  | -24.60114811  |
| B      | FC | 5        | 2 | 5               | 3                   | 145        | 2.03            | 2.018        | -24.53312788  | -24.60016908  | -24.60167393  |
| C      | CV | 2        | 3 | 6               | 4                   | 18         | 0.002           | 0.002        | -37.68658636  | -37.79098432  | -37.79211960  |
| C      | CV | 3        | 3 | 6               | 4                   | 43         | 0.015           | 0.014        | -37.69166033  | -37.82684726  | -37.82931970  |
| C      | CV | 4        | 3 | 6               | 4                   | 84         | 0.211           | 0.205        | -37.69332962  | -37.83650598  | -37.83928583  |
| C      | CV | 5        | 3 | 6               | 4                   | 145        | 1.979           | 1.943        | -37.69368131  | -37.83927308  | -37.84214181  |
| C      | FC | 2        | 3 | 6               | 4                   | 18         | 0.002           | 0.002        | -37.68658636  | -37.76197272  | -37.76294774  |
| C      | FC | 3        | 3 | 6               | 4                   | 43         | 0.014           | 0.014        | -37.69166033  | -37.78048427  | -37.78262224  |
| C      | FC | 4        | 3 | 6               | 4                   | 84         | 0.188           | 0.184        | -37.69332962  | -37.78479311  | -37.78719432  |
| C      | FC | 5        | 3 | 6               | 4                   | 145        | 1.905           | 1.887        | -37.69368131  | -37.78601546  | -37.78849597  |
| Cl     | CV | 2        | 2 | 17              | 7                   | 27         | 0.005           | 0.003        | -459.47154982 | -459.75526577 | -459.75793110 |
| Cl     | CV | 3        | 2 | 17              | 7                   | 59         | 0.056           | 0.046        | -459.48569051 | -459.97112605 | -459.97951886 |
| Cl     | CV | 4        | 2 | 17              | 7                   | 109        | 0.632           | 0.56         | -459.48924081 | -460.06582026 | -460.07619060 |
| Cl     | CV | 5        | 2 | 17              | 7                   | 181        | 5.008           | 4.485        | -459.48977562 | -460.10523644 | -460.11619870 |
| Cl     | FC | 2        | 2 | 17              | 7                   | 27         | 0.003           | 0.002        | -459.47154982 | -459.60555930 | -459.60715704 |
| Cl     | FC | 3        | 2 | 17              | 7                   | 59         | 0.036           | 0.034        | -459.48569051 | -459.67081243 | -459.67689256 |
| Cl     | FC | 4        | 2 | 17              | 7                   | 109        | 0.51            | 0.494        | -459.48924081 | -459.68907286 | -459.69650501 |
| Cl     | FC | 5        | 2 | 17              | 7                   | 181        | 4.243           | 4.157        | -459.48977562 | -459.69392110 | -459.70173402 |
| F      | CV | 2        | 2 | 9               | 7                   | 18         | 0.002           | 0.002        | -99.37531091  | -99.56548880  | -99.56670982  |
| F      | CV | 3        | 2 | 9               | 7                   | 43         | 0.014           | 0.013        | -99.40558305  | -99.67816009  | -99.68231764  |
| F      | CV | 4        | 2 | 9               | 7                   | 84         | 0.21            | 0.198        | -99.41379882  | -99.70995972  | -99.71506900  |
| F      | CV | 5        | 2 | 9               | 7                   | 145        | 1.924           | 1.86         | -99.41605193  | -99.72022495  | -99.72568156  |
| F      | FC | 2        | 2 | 9               | 7                   | 18         | 0.002           | 0.002        | -99.37531091  | -99.53472335  | -99.53584851  |
| F      | FC | 3        | 2 | 9               | 7                   | 43         | 0.013           | 0.012        | -99.40558305  | -99.62339863  | -99.62728976  |
| F      | FC | 4        | 2 | 9               | 7                   | 84         | 0.201           | 0.193        | -99.41379882  | -99.64860164  | -99.65338981  |
| F      | FC | 5        | 2 | 9               | 7                   | 145        | 1.908           | 1.864        | -99.41605193  | -99.65693019  | -99.66205181  |
| N      | CV | 2        | 4 | 7               | 5                   | 18         | 0.002           | 0.002        | -54.39120752  | -54.51155452  | -54.51235036  |
| N      | CV | 3        | 4 | 7               | 5                   | 43         | 0.014           | 0.013        | -54.40080109  | -54.56471230  | -54.56738385  |

| System | CV | Cardinal | M | N <sub>el</sub> | N <sub>val,el</sub> | Basis size | Time SD(T), min | Time SD, min | HF            | CCSD          | CCSD(T)       |
|--------|----|----------|---|-----------------|---------------------|------------|-----------------|--------------|---------------|---------------|---------------|
| N      | CV | 4        | 4 | 7               | 5                   | 84         | 0.199           | 0.191        | -54.40373484  | -54.57828008  | -54.58143988  |
| N      | CV | 5        | 4 | 7               | 5                   | 145        | 1.834           | 1.791        | -54.40444305  | -54.58225337  | -54.58555929  |
| N      | FC | 2        | 4 | 7               | 5                   | 18         | 0.002           | 0.002        | -54.39120752  | -54.48169855  | -54.48240110  |
| N      | FC | 3        | 4 | 7               | 5                   | 43         | 0.012           | 0.012        | -54.40080109  | -54.51520331  | -54.51763216  |
| N      | FC | 4        | 4 | 7               | 5                   | 84         | 0.182           | 0.178        | -54.40373484  | -54.52302726  | -54.52590094  |
| N      | FC | 5        | 4 | 7               | 5                   | 145        | 1.684           | 1.661        | -54.40444305  | -54.52536151  | -54.52837189  |
| O      | CV | 2        | 3 | 8               | 6                   | 18         | 0.002           | 0.002        | -74.79228596  | -74.94520131  | -74.94619972  |
| O      | CV | 3        | 3 | 8               | 6                   | 43         | 0.014           | 0.013        | -74.81185183  | -75.02779987  | -75.03119727  |
| O      | CV | 4        | 3 | 8               | 6                   | 84         | 0.222           | 0.212        | -74.81732590  | -75.05009728  | -75.05420818  |
| O      | CV | 5        | 3 | 8               | 6                   | 145        | 2.125           | 2.071        | -74.81878772  | -75.05705314  | -75.06140368  |
| O      | FC | 2        | 3 | 8               | 6                   | 18         | 0.002           | 0.002        | -74.79228596  | -74.91497714  | -74.91587772  |
| O      | FC | 3        | 3 | 8               | 6                   | 43         | 0.013           | 0.012        | -74.81185183  | -74.97566730  | -74.97880038  |
| O      | FC | 4        | 3 | 8               | 6                   | 84         | 0.204           | 0.198        | -74.81732590  | -74.99181195  | -74.99560778  |
| O      | FC | 5        | 3 | 8               | 6                   | 145        | 2.025           | 1.99         | -74.81878772  | -74.99696897  | -75.00099213  |
| P      | CV | 2        | 4 | 15              | 5                   | 27         | 0.004           | 0.003        | -340.70924975 | -340.94096681 | -340.94337961 |
| P      | CV | 3        | 4 | 15              | 5                   | 59         | 0.051           | 0.042        | -340.71644935 | -341.10711594 | -341.11360486 |
| P      | CV | 4        | 4 | 15              | 5                   | 109        | 0.591           | 0.536        | -340.71882144 | -341.18694401 | -341.19477656 |
| P      | CV | 5        | 4 | 15              | 5                   | 181        | 4.603           | 4.222        | -340.71916916 | -341.22143701 | -341.22967021 |
| P      | FC | 2        | 4 | 15              | 5                   | 27         | 0.002           | 0.002        | -340.70924975 | -340.79320545 | -340.79438646 |
| P      | FC | 3        | 4 | 15              | 5                   | 59         | 0.033           | 0.032        | -340.71644935 | -340.81866817 | -340.82265525 |
| P      | FC | 4        | 4 | 15              | 5                   | 109        | 0.459           | 0.451        | -340.71882144 | -340.82441826 | -340.82905789 |
| P      | FC | 5        | 4 | 15              | 5                   | 181        | 3.785           | 3.741        | -340.71916916 | -340.82577534 | -340.83057819 |
| S      | CV | 2        | 3 | 16              | 6                   | 27         | 0.004           | 0.003        | -397.49725711 | -397.75381722 | -397.75638667 |
| S      | CV | 3        | 3 | 16              | 6                   | 59         | 0.055           | 0.046        | -397.50955947 | -397.94473562 | -397.95209822 |
| S      | CV | 4        | 3 | 16              | 6                   | 109        | 0.644           | 0.582        | -397.51274737 | -398.03254786 | -398.04152958 |
| S      | CV | 5        | 3 | 16              | 6                   | 181        | 5.109           | 4.652        | -397.51321879 | -398.06942699 | -398.07888523 |
| S      | FC | 2        | 3 | 16              | 6                   | 27         | 0.002           | 0.002        | -397.49725711 | -397.60453364 | -397.60596285 |
| S      | FC | 3        | 3 | 16              | 6                   | 59         | 0.033           | 0.032        | -397.50955947 | -397.65166417 | -397.65663671 |
| S      | FC | 4        | 3 | 16              | 6                   | 109        | 0.508           | 0.496        | -397.51274737 | -397.66321977 | -397.66914920 |
| S      | FC | 5        | 3 | 16              | 6                   | 181        | 4.164           | 4.099        | -397.51321879 | -397.66618226 | -397.67236383 |
| Si     | CV | 2        | 3 | 14              | 4                   | 27         | 0.004           | 0.003        | -288.85031171 | -289.05703463 | -289.05956570 |
| Si     | CV | 3        | 3 | 14              | 4                   | 59         | 0.053           | 0.046        | -288.85657424 | -289.21580311 | -289.22115385 |
| Si     | CV | 4        | 3 | 14              | 4                   | 109        | 0.633           | 0.58         | -288.85854384 | -289.28993851 | -289.29640864 |
| Si     | CV | 5        | 3 | 14              | 4                   | 181        | 4.955           | 4.608        | -288.85884514 | -289.32409204 | -289.33091565 |

| System | CV | Cardinal | M | N <sub>el</sub> | N <sub>val,el</sub> | Basis size | Time SD(T), min | Time SD, min | HF            | CCSD          | CCSD(T)       |
|--------|----|----------|---|-----------------|---------------------|------------|-----------------|--------------|---------------|---------------|---------------|
| Si     | FC | 2        | 3 | 14              | 4                   | 27         | 0.002           | 0.002        | -288.85031171 | -288.91568750 | -288.91677377 |
| Si     | FC | 3        | 3 | 14              | 4                   | 59         | 0.037           | 0.036        | -288.85657424 | -288.93145645 | -288.93398966 |
| Si     | FC | 4        | 3 | 14              | 4                   | 109        | 0.519           | 0.512        | -288.85854384 | -288.93541975 | -288.93829826 |
| Si     | FC | 5        | 3 | 14              | 4                   | 181        | 4.171           | 4.138        | -288.85884514 | -288.93624648 | -288.93920499 |



Table S17. Raw data for SDT(Q)/nZ (n = D, T, Q) computations. System name (System), core electrons treatment (CV), basis set cardinal number (Cardinal), multiplicity (M), total number of electrons ( $N_{el}$ ), number of valence electrons ( $N_{val\_el}$ ), number of basis functions (Basis size), time for SDT(Q) computation, (Time SDT(Q)), time for SDT computation (Time SDT), and energy components in Hartree (CCSDT, CCSDT(Q)) are provided.

| System | CV | Cardinal | M | $N_{el}$ | $N_{val\_el}$ | Basis size | Time SDT(Q), min | Time SDT, min | CCSDT         | CCSDT(Q)      |
|--------|----|----------|---|----------|---------------|------------|------------------|---------------|---------------|---------------|
| alh    | CV | 2        | 1 | 14       | 4             | 32         | 0.384            | 0.327         | -242.66217920 | -242.66217499 |
| alh    | CV | 3        | 1 | 14       | 4             | 73         | 10.421           | 5.292         | -242.82709829 | -242.82721781 |
| alh    | CV | 4        | 1 | 14       | 4             | 139        | 220.109          | 53.958        | -242.90153514 | -242.90167104 |
| alh    | FC | 2        | 1 | 14       | 4             | 32         | 0.018            | 0.015         | -242.53058010 | -242.53061025 |
| alh    | FC | 3        | 1 | 14       | 4             | 73         | 0.65             | 0.461         | -242.54714037 | -242.54718924 |
| alh    | FC | 4        | 1 | 14       | 4             | 139        | 10.626           | 5.43          | -242.55114497 | -242.55120093 |
| bf     | CV | 2        | 1 | 14       | 10            | 36         | 0.682            | 0.552         | -124.44969682 | -124.45029410 |
| bf     | CV | 3        | 1 | 14       | 10            | 86         | 22.314           | 10.721        | -124.61102823 | -124.61157377 |
| bf     | CV | 4        | 1 | 14       | 10            | 168        | 629.389          | 153.507       | -124.65391963 | -124.65452338 |
| bf     | FC | 2        | 1 | 14       | 10            | 36         | 0.261            | 0.208         | -124.39038814 | -124.39096091 |
| bf     | FC | 3        | 1 | 14       | 10            | 86         | 9.255            | 4.549         | -124.51128447 | -124.51178960 |
| bf     | FC | 4        | 1 | 14       | 10            | 168        | 234.94           | 56.477        | -124.54228183 | -124.54283936 |
| bh     | CV | 2        | 1 | 6        | 4             | 23         | 0.022            | 0.018         | -25.24466240  | -25.24472349  |
| bh     | CV | 3        | 1 | 6        | 4             | 57         | 0.622            | 0.397         | -25.27621373  | -25.27629053  |
| bh     | CV | 4        | 1 | 6        | 4             | 114        | 11.338           | 4.608         | -25.28491757  | -25.28500056  |
| bh     | FC | 2        | 1 | 6        | 4             | 23         | 0.01             | 0.009         | -25.21673344  | -25.21678592  |
| bh     | FC | 3        | 1 | 6        | 4             | 57         | 0.305            | 0.228         | -25.23222055  | -25.23228755  |
| bh     | FC | 4        | 1 | 6        | 4             | 114        | 5.268            | 3.092         | -25.23580857  | -25.23588044  |
| bh3    | CV | 2        | 1 | 8        | 6             | 33         | 0.13             | 0.099         | -26.53911619  | -26.53915362  |
| bh3    | CV | 3        | 1 | 8        | 6             | 85         | 5.224            | 2.292         | -26.58480593  | -26.58485240  |
| bh3    | CV | 4        | 1 | 8        | 6             | 174        | 164.84           | 33.959        | -26.59634236  | -26.59639709  |
| bh3    | FC | 2        | 1 | 8        | 6             | 33         | 0.064            | 0.048         | -26.51057689  | -26.51061114  |
| bh3    | FC | 3        | 1 | 8        | 6             | 85         | 2.93             | 1.388         | -26.53953745  | -26.53958139  |
| bh3    | FC | 4        | 1 | 8        | 6             | 174        | 87.911           | 20.814        | -26.54582660  | -26.54587832  |
| cf     | CV | 2        | 2 | 15       | 11            | 36         | 1.296            | 1.045         | -137.54769937 | -137.54831640 |
| cf     | CV | 3        | 2 | 15       | 11            | 86         | 59.976           | 25.721        | -137.71682263 | -137.71743332 |
| cf     | CV | 4        | 2 | 15       | 11            | 168        | 1517.935         | 357.734       | -137.76329970 | -137.76398389 |
| cf     | FC | 2        | 2 | 15       | 11            | 36         | 0.49             | 0.411         | -137.48710218 | -137.48769305 |
| cf     | FC | 3        | 2 | 15       | 11            | 86         | 26.083           | 11.065        | -137.61446717 | -137.61503171 |

| System   | CV | Cardinal | M | N <sub>el</sub> | N <sub>val_el</sub> | Basis size | Time SDT(Q), min | Time SDT, min | CCSDT         | CCSDT(Q)      |
|----------|----|----------|---|-----------------|---------------------|------------|------------------|---------------|---------------|---------------|
| cf       | FC | 4        | 2 | 15              | 11                  | 168        | 646.42           | 141.438       | -137.64885510 | -137.64948544 |
| ch       | CV | 2        | 2 | 7               | 5                   | 23         | 0.053            | 0.045         | -38.41238313  | -38.41245492  |
| ch       | CV | 3        | 2 | 7               | 5                   | 57         | 1.809            | 1.031         | -38.45995091  | -38.46004007  |
| ch       | CV | 4        | 2 | 7               | 5                   | 114        | 34.293           | 11.079        | -38.47251288  | -38.47261618  |
| ch       | FC | 2        | 2 | 7               | 5                   | 23         | 0.029            | 0.024         | -38.38296575  | -38.38302968  |
| ch       | FC | 3        | 2 | 7               | 5                   | 57         | 0.866            | 0.578         | -38.41295889  | -38.41303674  |
| ch       | FC | 4        | 2 | 7               | 5                   | 114        | 15.105           | 6.483         | -38.42010653  | -38.42019609  |
| ch2-sing | CV | 2        | 1 | 8               | 6                   | 28         | 0.084            | 0.07          | -39.05535217  | -39.05551604  |
| ch2-sing | CV | 3        | 1 | 8               | 6                   | 71         | 2.841            | 1.641         | -39.11159461  | -39.11180062  |
| ch2-sing | CV | 4        | 1 | 8               | 6                   | 144        | 64.309           | 19.16         | -39.12624246  | -39.12647422  |
| ch2-sing | FC | 2        | 1 | 8               | 6                   | 28         | 0.044            | 0.037         | -39.02562706  | -39.02578173  |
| ch2-sing | FC | 3        | 1 | 8               | 6                   | 71         | 1.612            | 0.971         | -39.06417644  | -39.06436986  |
| ch2-sing | FC | 4        | 1 | 8               | 6                   | 144        | 35.682           | 12.293        | -39.07337446  | -39.07359111  |
| ch2-trip | CV | 2        | 3 | 8               | 6                   | 28         | 0.124            | 0.095         | -39.07419265  | -39.07426593  |
| ch2-trip | CV | 3        | 3 | 8               | 6                   | 71         | 5.266            | 2.286         | -39.12807200  | -39.12815194  |
| ch2-trip | CV | 4        | 3 | 8               | 6                   | 144        | 139.237          | 30.262        | -39.14181375  | -39.14190935  |
| ch2-trip | FC | 2        | 3 | 8               | 6                   | 28         | 0.06             | 0.048         | -39.04426391  | -39.04433229  |
| ch2-trip | FC | 3        | 3 | 8               | 6                   | 71         | 2.571            | 1.311         | -39.08017367  | -39.08024721  |
| ch2-trip | FC | 4        | 3 | 8               | 6                   | 144        | 64.349           | 17.358        | -39.08841616  | -39.08850380  |
| ch3      | CV | 2        | 2 | 9               | 7                   | 33         | 0.298            | 0.206         | -39.74914849  | -39.74926326  |
| ch3      | CV | 3        | 2 | 9               | 7                   | 85         | 15.47            | 5.3           | -39.81170553  | -39.81182612  |
| ch3      | CV | 4        | 2 | 9               | 7                   | 174        | 501.427          | 81.655        | -39.82737017  | -39.82751231  |
| ch3      | FC | 2        | 2 | 9               | 7                   | 33         | 0.166            | 0.115         | -39.71886464  | -39.71897309  |
| ch3      | FC | 3        | 2 | 9               | 7                   | 85         | 8.58             | 3.048         | -39.76340053  | -39.76351476  |
| ch3      | FC | 4        | 2 | 9               | 7                   | 174        | 283.398          | 46.327        | -39.77354085  | -39.77367528  |
| cn       | CV | 2        | 2 | 13              | 9                   | 36         | 1.157            | 0.986         | -92.55966804  | -92.56176145  |
| cn       | CV | 3        | 2 | 13              | 9                   | 86         | 45.669           | 21.31         | -92.62851711  | -92.63042522  |
| cn       | CV | 4        | 2 | 13              | 9                   | 168        | 1079.502         | 252.522       | -92.65578053  | -92.65761646  |
| cn       | FC | 2        | 2 | 13              | 9                   | 36         | 0.39             | 0.335         | -92.49933819  | -92.50137615  |
| cn       | FC | 3        | 2 | 13              | 9                   | 86         | 17.411           | 7.632         | -92.53030026  | -92.53214250  |
| cn       | FC | 4        | 2 | 13              | 9                   | 168        | 423.894          | 92.819        | -92.54613929  | -92.54791118  |
| co       | CV | 2        | 1 | 14              | 10                  | 36         | 0.685            | 0.555         | -113.12541643 | -113.12651893 |
| co       | CV | 3        | 1 | 14              | 10                  | 86         | 21.362           | 10.042        | -113.26454277 | -113.26573761 |
| co       | CV | 4        | 1 | 14              | 10                  | 168        | 620.952          | 144.585       | -113.30335776 | -113.30464777 |

| System | CV | Cardinal | M | N <sub>el</sub> | N <sub>val_el</sub> | Basis size | Time SDT(Q), min | Time SDT, min | CCSDT         | CCSDT(Q)      |
|--------|----|----------|---|-----------------|---------------------|------------|------------------|---------------|---------------|---------------|
| co     | FC | 2        | 1 | 14              | 10                  | 36         | 0.263            | 0.209         | -113.06489198 | -113.06595928 |
| co     | FC | 3        | 1 | 14              | 10                  | 86         | 8.936            | 4.249         | -113.16387727 | -113.16502129 |
| co     | FC | 4        | 1 | 14              | 10                  | 168        | 232.761          | 56.784        | -113.19091010 | -113.19214233 |
| f2     | CV | 2        | 1 | 18              | 14                  | 36         | 0.678            | 0.465         | -199.17650779 | -199.17816035 |
| f2     | CV | 3        | 1 | 18              | 14                  | 86         | 29.785           | 11.047        | -199.42051850 | -199.42214153 |
| f2     | CV | 4        | 1 | 18              | 14                  | 168        | 728.09           | 131.401       | -199.48856241 | -199.49033942 |
| f2     | FC | 2        | 1 | 18              | 14                  | 36         | 0.397            | 0.283         | -199.11460051 | -199.11622734 |
| f2     | FC | 3        | 1 | 18              | 14                  | 86         | 14.853           | 5.538         | -199.31036637 | -199.31195269 |
| f2     | FC | 4        | 1 | 18              | 14                  | 168        | 335.119          | 59.663        | -199.36511923 | -199.36685104 |
| h2o    | CV | 2        | 1 | 10              | 8                   | 28         | 0.113            | 0.092         | -76.27845597  | -76.27892310  |
| h2o    | CV | 3        | 1 | 10              | 8                   | 71         | 4.296            | 2.251         | -76.39016409  | -76.39054543  |
| h2o    | CV | 4        | 1 | 10              | 8                   | 144        | 110.097          | 28.153        | -76.42112532  | -76.42156084  |
| h2o    | FC | 2        | 1 | 10              | 8                   | 28         | 0.065            | 0.053         | -76.24748006  | -76.24793683  |
| h2o    | FC | 3        | 1 | 10              | 8                   | 71         | 2.561            | 1.356         | -76.33706430  | -76.33742665  |
| h2o    | FC | 4        | 1 | 10              | 8                   | 144        | 62.097           | 16.814        | -76.36177956  | -76.36219122  |
| h2s    | CV | 2        | 1 | 18              | 8                   | 37         | 1.111            | 0.896         | -399.02462515 | -399.02489416 |
| h2s    | CV | 3        | 1 | 18              | 8                   | 87         | 43.639           | 17.789        | -399.23769488 | -399.23812512 |
| h2s    | CV | 4        | 1 | 18              | 8                   | 169        | 1241.699         | 213.642       | -399.33242100 | -399.33294622 |
| h2s    | FC | 2        | 1 | 18              | 8                   | 37         | 0.113            | 0.084         | -398.87385805 | -398.87409602 |
| h2s    | FC | 3        | 1 | 18              | 8                   | 87         | 4.768            | 2.125         | -398.94160945 | -398.94195986 |
| h2s    | FC | 4        | 1 | 18              | 8                   | 169        | 122.422          | 26.72         | -398.95943587 | -398.95986670 |
| hcl    | CV | 2        | 1 | 18              | 8                   | 32         | 0.434            | 0.345         | -460.41569389 | -460.41598198 |
| hcl    | CV | 3        | 1 | 18              | 8                   | 73         | 18.877           | 8.982         | -460.64677245 | -460.64717417 |
| hcl    | CV | 4        | 1 | 18              | 8                   | 139        | 457              | 112.947       | -460.74641855 | -460.74692766 |
| hcl    | FC | 2        | 1 | 18              | 8                   | 32         | 0.06             | 0.048         | -460.26470626 | -460.26496270 |
| hcl    | FC | 3        | 1 | 18              | 8                   | 73         | 2.217            | 1.146         | -460.34385827 | -460.34418115 |
| hcl    | FC | 4        | 1 | 18              | 8                   | 139        | 45.506           | 12.092        | -460.36644969 | -460.36686121 |
| hf     | CV | 2        | 1 | 10              | 8                   | 23         | 0.056            | 0.045         | -100.26785989 | -100.26825758 |
| hf     | CV | 3        | 1 | 10              | 8                   | 57         | 1.729            | 1.04          | -100.40056590 | -100.40083556 |
| hf     | CV | 4        | 1 | 10              | 8                   | 114        | 33.675           | 10.523        | -100.43819603 | -100.43850542 |
| hf     | FC | 2        | 1 | 10              | 8                   | 23         | 0.031            | 0.026         | -100.23668288 | -100.23707138 |
| hf     | FC | 3        | 1 | 10              | 8                   | 57         | 1.01             | 0.598         | -100.34519971 | -100.34544899 |
| hf     | FC | 4        | 1 | 10              | 8                   | 114        | 19.675           | 6.521         | -100.37616385 | -100.37644727 |
| hs     | CV | 2        | 2 | 17              | 7                   | 32         | 0.829            | 0.609         | -398.38259190 | -398.38277625 |

| System | CV | Cardinal | M | N <sub>el</sub> | N <sub>val_el</sub> | Basis size | Time SDT(Q), min | Time SDT, min | CCSDT         | CCSDT(Q)      |
|--------|----|----------|---|-----------------|---------------------|------------|------------------|---------------|---------------|---------------|
| hs     | CV | 3        | 2 | 17              | 7                   | 73         | 36.616           | 16.929        | -398.58803998 | -398.58834246 |
| hs     | CV | 4        | 2 | 17              | 7                   | 139        | 760.031          | 195.144       | -398.68043207 | -398.68081640 |
| hs     | FC | 2        | 2 | 17              | 7                   | 32         | 0.091            | 0.071         | -398.23200091 | -398.23215711 |
| hs     | FC | 3        | 2 | 17              | 7                   | 73         | 3.653            | 1.649         | -398.29231639 | -398.29253955 |
| hs     | FC | 4        | 2 | 17              | 7                   | 139        | 78.832           | 19.647        | -398.30780462 | -398.30809419 |
| n2     | CV | 2        | 1 | 14              | 10                  | 36         | 0.43             | 0.291         | -109.34591435 | -109.34761038 |
| n2     | CV | 3        | 1 | 14              | 10                  | 86         | 14.969           | 5.158         | -109.48237926 | -109.48424592 |
| n2     | CV | 4        | 1 | 14              | 10                  | 168        | 336.819          | 54.707        | -109.51945144 | -109.52143853 |
| n2     | FC | 2        | 1 | 14              | 10                  | 36         | 0.179            | 0.116         | -109.28493267 | -109.28659464 |
| n2     | FC | 3        | 1 | 14              | 10                  | 86         | 6.316            | 2.207         | -109.38134745 | -109.38317361 |
| n2     | FC | 4        | 1 | 14              | 10                  | 168        | 132.247          | 22.81         | -109.40668062 | -109.40862184 |
| nh     | CV | 2        | 3 | 8               | 6                   | 23         | 0.059            | 0.049         | -55.12602008  | -55.12613331  |
| nh     | CV | 3        | 3 | 8               | 6                   | 57         | 2.152            | 1.178         | -55.19414702  | -55.19425701  |
| nh     | CV | 4        | 3 | 8               | 6                   | 114        | 44.94            | 13.619        | -55.21194834  | -55.21208098  |
| nh     | FC | 2        | 3 | 8               | 6                   | 23         | 0.03             | 0.025         | -55.09579361  | -55.09590090  |
| nh     | FC | 3        | 3 | 8               | 6                   | 57         | 1.061            | 0.644         | -55.14414348  | -55.14424257  |
| nh     | FC | 4        | 3 | 8               | 6                   | 114        | 20.467           | 7.164         | -55.15614442  | -55.15626301  |
| nh2    | CV | 2        | 2 | 9               | 7                   | 28         | 0.186            | 0.145         | -55.76784443  | -55.76806126  |
| nh2    | CV | 3        | 2 | 9               | 7                   | 71         | 7.765            | 3.585         | -55.84747658  | -55.84768655  |
| nh2    | CV | 4        | 2 | 9               | 7                   | 144        | 192.698          | 45.639        | -55.86853405  | -55.86877898  |
| nh2    | FC | 2        | 2 | 9               | 7                   | 28         | 0.096            | 0.074         | -55.73728348  | -55.73749262  |
| nh2    | FC | 3        | 2 | 9               | 7                   | 71         | 4.328            | 2.021         | -55.79709424  | -55.79729235  |
| nh2    | FC | 4        | 2 | 9               | 7                   | 144        | 109.228          | 26.274        | -55.81232382  | -55.81255359  |
| nh3    | CV | 2        | 1 | 10              | 8                   | 33         | 0.365            | 0.308         | -56.43766347  | -56.43798980  |
| nh3    | CV | 3        | 1 | 10              | 8                   | 85         | 16.597           | 7.901         | -56.52740157  | -56.52771876  |
| nh3    | CV | 4        | 1 | 10              | 8                   | 174        | 681.104          | 144.905       | -56.55108132  | -56.55144637  |
| nh3    | FC | 2        | 1 | 10              | 8                   | 33         | 0.204            | 0.17          | -56.40668728  | -56.40700396  |
| nh3    | FC | 3        | 1 | 10              | 8                   | 85         | 9.845            | 4.843         | -56.47649833  | -56.47680284  |
| nh3    | FC | 4        | 1 | 10              | 8                   | 174        | 394.256          | 80.484        | -56.49431277  | -56.49466204  |
| no     | CV | 2        | 2 | 15              | 11                  | 36         | 1.701            | 1.343         | -129.67037223 | -129.67186106 |
| no     | CV | 3        | 2 | 15              | 11                  | 86         | 62.884           | 28.657        | -129.82893043 | -129.83053802 |
| no     | CV | 4        | 2 | 15              | 11                  | 168        | 1052.587         | 337.936       | -129.87324780 | -129.87498687 |
| no     | FC | 2        | 2 | 15              | 11                  | 36         | 0.69             | 0.531         | -129.60925950 | -129.61071298 |
| no     | FC | 3        | 2 | 15              | 11                  | 86         | 26.831           | 11.872        | -129.72581941 | -129.72737848 |

| System | CV | Cardinal | M | N <sub>el</sub> | N <sub>val_el</sub> | Basis size | Time SDT(Q), min | Time SDT, min | CCSDT         | CCSDT(Q)      |
|--------|----|----------|---|-----------------|---------------------|------------|------------------|---------------|---------------|---------------|
| no     | FC | 4        | 2 | 15              | 11                  | 168        | 416.437          | 135.255       | -129.75807794 | -129.75976114 |
| o2     | CV | 2        | 3 | 16              | 12                  | 36         | 1.061            | 0.65          | -150.05967915 | -150.06156285 |
| o2     | CV | 3        | 3 | 16              | 12                  | 86         | 46.425           | 14.2          | -150.24461196 | -150.24649965 |
| o2     | CV | 4        | 3 | 16              | 12                  | 168        | 995.307          | 149.32        | -150.29592613 | -150.29794867 |
| o2     | FC | 2        | 3 | 16              | 12                  | 36         | 0.481            | 0.279         | -149.99844998 | -150.00030549 |
| o2     | FC | 3        | 3 | 16              | 12                  | 86         | 21.862           | 5.992         | -150.13919773 | -150.14104982 |
| o2     | FC | 4        | 3 | 16              | 12                  | 168        | 468.424          | 64.022        | -150.17808229 | -150.18006253 |
| oh     | CV | 2        | 2 | 9               | 7                   | 23         | 0.076            | 0.062         | -75.59621903  | -75.59646528  |
| oh     | CV | 3        | 2 | 9               | 7                   | 57         | 3.056            | 1.626         | -75.69553353  | -75.69572956  |
| oh     | CV | 4        | 2 | 9               | 7                   | 114        | 62.447           | 18.949        | -75.72286392  | -75.72309656  |
| oh     | FC | 2        | 2 | 9               | 7                   | 23         | 0.042            | 0.034         | -75.56559094  | -75.56582996  |
| oh     | FC | 3        | 2 | 9               | 7                   | 57         | 1.659            | 0.893         | -75.64283436  | -75.64301504  |
| oh     | FC | 4        | 2 | 9               | 7                   | 114        | 34.381           | 10.261        | -75.66394539  | -75.66415807  |
| sih    | CV | 2        | 2 | 15              | 5                   | 32         | 0.894            | 0.71          | -289.66609263 | -289.66614854 |
| sih    | CV | 3        | 2 | 15              | 5                   | 73         | 28.466           | 13.647        | -289.83620784 | -289.83637403 |
| sih    | CV | 4        | 2 | 15              | 5                   | 139        | 536.153          | 133.023       | -289.91365985 | -289.91385431 |
| sih    | FC | 2        | 2 | 15              | 5                   | 32         | 0.052            | 0.043         | -289.52344679 | -289.52349316 |
| sih    | FC | 3        | 2 | 15              | 5                   | 73         | 1.806            | 1.077         | -289.54906867 | -289.54915035 |
| sih    | FC | 4        | 2 | 15              | 5                   | 139        | 32.258           | 11.434        | -289.55557146 | -289.55567047 |
| Al     | CV | 2        | 2 | 13              | 3                   | 27         | 0.133            | 0.101         | -242.05431894 | -242.05429204 |
| Al     | CV | 3        | 2 | 13              | 3                   | 59         | 4.564            | 1.591         | -242.21219575 | -242.21228558 |
| Al     | CV | 4        | 2 | 13              | 3                   | 109        | 79.86            | 15.348        | -242.28502837 | -242.28513103 |
| Al     | FC | 2        | 2 | 13              | 3                   | 27         | 0.005            | 0.005         | -241.92233030 | -241.92233030 |
| Al     | FC | 3        | 2 | 13              | 3                   | 59         | 0.093            | 0.093         | -241.93206870 | -241.93206870 |
| Al     | FC | 4        | 2 | 13              | 3                   | 109        | 1.122            | 1.122         | -241.93451220 | -241.93451220 |
| B      | CV | 2        | 2 | 5               | 3                   | 18         | 0.009            | 0.007         | -24.61908952  | -24.61910023  |
| B      | CV | 3        | 2 | 5               | 3                   | 43         | 0.168            | 0.091         | -24.64320882  | -24.64322199  |
| B      | CV | 4        | 2 | 5               | 3                   | 84         | 2.462            | 0.895         | -24.65031511  | -24.65032982  |
| B      | FC | 2        | 2 | 5               | 3                   | 18         | 0.003            | 0.003         | -24.59131471  | -24.59131471  |
| B      | FC | 3        | 2 | 5               | 3                   | 43         | 0.04             | 0.04          | -24.59953105  | -24.59953105  |
| B      | FC | 4        | 2 | 5               | 3                   | 84         | 0.507            | 0.507         | -24.60155388  | -24.60155388  |
| C      | CV | 2        | 3 | 6               | 4                   | 18         | 0.009            | 0.007         | -37.79242862  | -37.79246032  |
| C      | CV | 3        | 3 | 6               | 4                   | 43         | 0.149            | 0.086         | -37.82979088  | -37.82983798  |
| C      | CV | 4        | 3 | 6               | 4                   | 84         | 3.254            | 0.993         | -37.83975172  | -37.83980636  |

| System | CV | Cardinal | M | N <sub>el</sub> | N <sub>val_el</sub> | Basis size | Time SDT(Q), min | Time SDT, min | CCSDT         | CCSDT(Q)      |
|--------|----|----------|---|-----------------|---------------------|------------|------------------|---------------|---------------|---------------|
| C      | FC | 2        | 3 | 6               | 4                   | 18         | 0.004            | 0.004         | -37.76325429  | -37.76327789  |
| C      | FC | 3        | 3 | 6               | 4                   | 43         | 0.056            | 0.044         | -37.78308318  | -37.78311815  |
| C      | FC | 4        | 3 | 6               | 4                   | 84         | 0.842            | 0.561         | -37.78764952  | -37.78768993  |
| Cl     | CV | 2        | 2 | 17              | 7                   | 27         | 0.258            | 0.177         | -459.75812946 | -459.75830896 |
| Cl     | CV | 3        | 2 | 17              | 7                   | 59         | 9.379            | 3.673         | -459.98005085 | -459.98029229 |
| Cl     | CV | 4        | 2 | 17              | 7                   | 109        | 148.925          | 29.806        | -460.07677230 | -460.07710284 |
| Cl     | FC | 2        | 2 | 17              | 7                   | 27         | 0.028            | 0.019         | -459.60741570 | -459.60756776 |
| Cl     | FC | 3        | 2 | 17              | 7                   | 59         | 0.967            | 0.321         | -459.67755374 | -459.67772353 |
| Cl     | FC | 4        | 2 | 17              | 7                   | 109        | 16.542           | 3.025         | -459.69721610 | -459.69745729 |
| F      | CV | 2        | 2 | 9               | 7                   | 18         | 0.021            | 0.016         | -99.56677194  | -99.56689113  |
| F      | CV | 3        | 2 | 9               | 7                   | 43         | 0.623            | 0.255         | -99.68247466  | -99.68255830  |
| F      | CV | 4        | 2 | 9               | 7                   | 84         | 10.933           | 2.455         | -99.71524067  | -99.71534940  |
| F      | FC | 2        | 2 | 9               | 7                   | 18         | 0.015            | 0.013         | -99.53591115  | -99.53602508  |
| F      | FC | 3        | 2 | 9               | 7                   | 43         | 0.343            | 0.143         | -99.62744934  | -99.62751998  |
| F      | FC | 4        | 2 | 9               | 7                   | 84         | 6.317            | 1.449         | -99.65356465  | -99.65365643  |
| N      | CV | 2        | 4 | 7               | 5                   | 18         | 0.009            | 0.007         | -54.51247717  | -54.51251840  |
| N      | CV | 3        | 4 | 7               | 5                   | 43         | 0.182            | 0.098         | -54.56770223  | -54.56775256  |
| N      | CV | 4        | 4 | 7               | 5                   | 84         | 4.603            | 1.137         | -54.58176421  | -54.58182838  |
| N      | FC | 2        | 4 | 7               | 5                   | 18         | 0.005            | 0.004         | -54.48252774  | -54.48256403  |
| N      | FC | 3        | 4 | 7               | 5                   | 43         | 0.07             | 0.049         | -54.51795050  | -54.51799050  |
| N      | FC | 4        | 4 | 7               | 5                   | 84         | 1.12             | 0.61          | -54.52622532  | -54.52627658  |
| O      | CV | 2        | 3 | 8               | 6                   | 18         | 0.016            | 0.013         | -74.94630565  | -74.94638281  |
| O      | CV | 3        | 3 | 8               | 6                   | 43         | 0.442            | 0.187         | -75.03147798  | -75.03154318  |
| O      | CV | 4        | 3 | 8               | 6                   | 84         | 7.935            | 1.832         | -75.05451402  | -75.05460141  |
| O      | FC | 2        | 3 | 8               | 6                   | 18         | 0.009            | 0.008         | -74.91598359  | -74.91605614  |
| O      | FC | 3        | 3 | 8               | 6                   | 43         | 0.212            | 0.102         | -74.97908071  | -74.97913461  |
| O      | FC | 4        | 3 | 8               | 6                   | 84         | 3.696            | 1.083         | -74.99591306  | -74.99598569  |
| P      | CV | 2        | 4 | 15              | 5                   | 27         | 0.182            | 0.113         | -340.94362699 | -340.94374325 |
| P      | CV | 3        | 4 | 15              | 5                   | 59         | 6.62             | 2.382         | -341.11424643 | -341.11446410 |
| P      | CV | 4        | 4 | 15              | 5                   | 109        | 102.456          | 17.336        | -341.19537992 | -341.19564447 |
| P      | FC | 2        | 4 | 15              | 5                   | 27         | 0.01             | 0.008         | -340.79469629 | -340.79477917 |
| P      | FC | 3        | 4 | 15              | 5                   | 59         | 0.277            | 0.159         | -340.82343125 | -340.82355516 |
| P      | FC | 4        | 4 | 15              | 5                   | 109        | 3.541            | 1.453         | -340.82979487 | -340.82995159 |
| S      | CV | 2        | 3 | 16              | 6                   | 27         | 0.207            | 0.135         | -397.75663994 | -397.75677664 |

| System | CV | Cardinal | M | N <sub>el</sub> | N <sub>val,el</sub> | Basis size | Time SDT(Q), min | Time SDT, min | CCSDT         | CCSDT(Q)      |
|--------|----|----------|---|-----------------|---------------------|------------|------------------|---------------|---------------|---------------|
| S      | CV | 3        | 3 | 16              | 6                   | 59         | 8.339            | 3.335         | -397.95275636 | -397.95296993 |
| S      | CV | 4        | 3 | 16              | 6                   | 109        | 125.73           | 25.021        | -398.04221424 | -398.04249886 |
| S      | FC | 2        | 3 | 16              | 6                   | 27         | 0.024            | 0.017         | -397.60627836 | -397.60638554 |
| S      | FC | 3        | 3 | 16              | 6                   | 59         | 0.622            | 0.256         | -397.65741986 | -397.65755247 |
| S      | FC | 4        | 3 | 16              | 6                   | 109        | 9.867            | 2.3           | -397.66995788 | -397.67014618 |
| Si     | CV | 2        | 3 | 14              | 4                   | 27         | 0.176            | 0.113         | -289.05992823 | -289.05998148 |
| Si     | CV | 3        | 3 | 14              | 4                   | 59         | 6.316            | 2.455         | -289.22179366 | -289.22195351 |
| Si     | CV | 4        | 3 | 14              | 4                   | 109        | 91.556           | 17.354        | -289.29700945 | -289.29719423 |
| Si     | FC | 2        | 3 | 14              | 4                   | 27         | 0.009            | 0.008         | -288.91719698 | -288.91723406 |
| Si     | FC | 3        | 3 | 14              | 4                   | 59         | 0.198            | 0.136         | -288.93473855 | -288.93479992 |
| Si     | FC | 4        | 3 | 14              | 4                   | 109        | 2.463            | 1.426         | -288.93900979 | -288.93908245 |

Table S18. Raw data for SDTQ(P)/nZ (n = D, T) computations. System name (System), core electrons treatment (CV), basis set cardinal number (Cardinal), multiplicity (M), total number of electrons ( $N_{el}$ ), number of valence electrons ( $N_{val\_el}$ ), number of basis functions (Basis size), time for SDTQ(P) computation, (Time SDTQ(P)), time for SDTQ computation (Time SDTQ), and energy components in Hartree (CCSDTQ, CCSDTQ(P)) are provided.

| System   | CV | Cardinal | M | $N_{el}$ | $N_{val\_el}$ | Basis size | Time SDTQ(P), min | Time SDTQ, min | CCSDTQ        | CCSDTQ(P)     |
|----------|----|----------|---|----------|---------------|------------|-------------------|----------------|---------------|---------------|
| bh3      | CV | 2        | 1 | 8        | 6             | 33         | 2.724             | 1.868          | -26.53916039  | -26.53916021  |
| bh3      | CV | 3        | 1 | 8        | 6             | 85         | 331.571           | 114.353        | -26.58485855  | -26.58485513  |
| bh3      | FC | 2        | 1 | 8        | 6             | 33         | 0.69              | 0.537          | -26.51061771  | -26.51061753  |
| bh3      | FC | 3        | 1 | 8        | 6             | 85         | 70.391            | 29.286         | -26.53958787  | -26.53958503  |
| ch       | CV | 2        | 2 | 7        | 5             | 23         | 0.396             | 0.323          | -38.41246858  | -38.41247018  |
| ch       | CV | 3        | 2 | 7        | 5             | 57         | 46.362            | 22.625         | -38.46005388  | -38.46005372  |
| ch       | FC | 2        | 2 | 7        | 5             | 23         | 0.084             | 0.075          | -38.38304293  | -38.38304438  |
| ch       | FC | 3        | 2 | 7        | 5             | 57         | 7.125             | 4.163          | -38.41305032  | -38.41305029  |
| ch2-sing | CV | 2        | 1 | 8        | 6             | 28         | 1.849             | 1.495          | -39.05554464  | -39.05554845  |
| ch2-sing | CV | 3        | 1 | 8        | 6             | 71         | 126.109           | 64.096         | -39.11183122  | -39.11182980  |
| ch2-sing | FC | 2        | 1 | 8        | 6             | 28         | 0.465             | 0.378          | -39.02581020  | -39.02581382  |
| ch2-sing | FC | 3        | 1 | 8        | 6             | 71         | 31.17             | 17.028         | -39.06440048  | -39.06439948  |
| ch2-trip | CV | 2        | 3 | 8        | 6             | 28         | 2.127             | 1.457          | -39.07427543  | -39.07427742  |
| ch2-trip | CV | 3        | 3 | 8        | 6             | 71         | 213.494           | 70.729         | -39.12815806  | -39.12815789  |
| ch2-trip | FC | 2        | 3 | 8        | 6             | 28         | 0.517             | 0.375          | -39.04434158  | -39.04434341  |
| ch2-trip | FC | 3        | 3 | 8        | 6             | 71         | 40.09             | 15.37          | -39.08025338  | -39.08025325  |
| ch3      | CV | 2        | 2 | 9        | 7             | 33         | 5.337             | 3.471          | -39.74927060  | -39.74927471  |
| ch3      | CV | 3        | 2 | 9        | 7             | 85         | 1433.425          | 356.86         | -39.81183262  | -39.81183100  |
| ch3      | FC | 2        | 2 | 9        | 7             | 33         | 1.801             | 1.16           | -39.71898035  | -39.71898423  |
| ch3      | FC | 3        | 2 | 9        | 7             | 85         | 414.639           | 98.021         | -39.76352172  | -39.76352029  |
| h2o      | CV | 2        | 1 | 10       | 8             | 28         | 3.26              | 2.407          | -76.27889315  | -76.27890913  |
| h2o      | CV | 3        | 1 | 10       | 8             | 71         | 383.068           | 127.991        | -76.39050973  | -76.39052393  |
| h2o      | FC | 2        | 1 | 10       | 8             | 28         | 1.457             | 1.066          | -76.24790773  | -76.24792311  |
| h2o      | FC | 3        | 1 | 10       | 8             | 71         | 128.345           | 49.16          | -76.33739230  | -76.33740544  |
| hf       | CV | 2        | 1 | 10       | 8             | 23         | 0.927             | 0.7            | -100.26823280 | -100.26824376 |
| hf       | CV | 3        | 1 | 10       | 8             | 57         | 101.801           | 44.572         | -100.40080497 | -100.40081169 |
| hf       | FC | 2        | 1 | 10       | 8             | 23         | 0.484             | 0.377          | -100.23704749 | -100.23705803 |
| hf       | FC | 3        | 1 | 10       | 8             | 57         | 36.824            | 17.405         | -100.34541945 | -100.34542533 |
| nh       | CV | 2        | 3 | 8        | 6             | 23         | 0.769             | 0.582          | -55.12614754  | -55.12615004  |



| System | CV | Cardinal | M | N <sub>el</sub> | N <sub>val,el</sub> | Basis size | Time SDTQ(P), min | Time SDTQ, min | CCSDTQ        | CCSDTQ(P)     |
|--------|----|----------|---|-----------------|---------------------|------------|-------------------|----------------|---------------|---------------|
| nh     | CV | 3        | 3 | 8               | 6                   | 57         | 56.71             | 26.124         | -55.19426187  | -55.19426346  |
| nh     | FC | 2        | 3 | 8               | 6                   | 23         | 0.193             | 0.155          | -55.09591516  | -55.09591745  |
| nh     | FC | 3        | 3 | 8               | 6                   | 57         | 12.199            | 6.32           | -55.14424753  | -55.14424885  |
| nh2    | CV | 2        | 2 | 9               | 7                   | 28         | 2.643             | 1.911          | -55.76806726  | -55.76807528  |
| nh2    | CV | 3        | 2 | 9               | 7                   | 71         | 528.478           | 174.939        | -55.84768638  | -55.84769089  |
| nh2    | FC | 2        | 2 | 9               | 7                   | 28         | 0.871             | 0.618          | -55.73749879  | -55.73750644  |
| nh2    | FC | 3        | 2 | 9               | 7                   | 71         | 164.695           | 55.622         | -55.79729269  | -55.79729683  |
| oh     | CV | 2        | 2 | 9               | 7                   | 23         | 0.847             | 0.663          | -75.59647120  | -75.59647719  |
| oh     | CV | 3        | 2 | 9               | 7                   | 57         | 154.119           | 63.842         | -75.69572036  | -75.69572539  |
| oh     | FC | 2        | 2 | 9               | 7                   | 23         | 0.332             | 0.259          | -75.56583636  | -75.56584201  |
| oh     | FC | 3        | 2 | 9               | 7                   | 57         | 49.694            | 20.349         | -75.64300633  | -75.64301079  |
| Al     | CV | 2        | 2 | 13              | 3                   | 27         | 4.33              | 2.097          | -242.05429515 | -242.05429325 |
| Al     | CV | 3        | 2 | 13              | 3                   | 59         | 525.31            | 123.936        | -242.21228078 | -242.21227879 |
| Al     | FC | 2        | 2 | 13              | 3                   | 27         | 0.005             | 0.005          | -241.92233030 | -241.92233030 |
| Al     | FC | 3        | 2 | 13              | 3                   | 59         | 0.094             | 0.094          | -241.93206870 | -241.93206870 |
| B      | CV | 2        | 2 | 5               | 3                   | 18         | 0.022             | 0.019          | -24.61910083  | -24.61910090  |
| B      | CV | 3        | 2 | 5               | 3                   | 43         | 1.08              | 0.493          | -24.64322237  | -24.64322241  |
| B      | FC | 2        | 2 | 5               | 3                   | 18         | 0.003             | 0.003          | -24.59131471  | -24.59131471  |
| B      | FC | 3        | 2 | 5               | 3                   | 43         | 0.038             | 0.038          | -24.59953105  | -24.59953105  |
| C      | CV | 2        | 3 | 6               | 4                   | 18         | 0.035             | 0.029          | -37.79246871  | -37.79246885  |
| C      | CV | 3        | 3 | 6               | 4                   | 43         | 1.799             | 0.819          | -37.82984526  | -37.82984540  |
| C      | FC | 2        | 3 | 6               | 4                   | 18         | 0.006             | 0.006          | -37.76328615  | -37.76328615  |
| C      | FC | 3        | 3 | 6               | 4                   | 43         | 0.111             | 0.111          | -37.78312550  | -37.78312550  |
| Cl     | CV | 2        | 2 | 17              | 7                   | 27         | 8.82              | 4.438          | -459.75831804 | -459.75832422 |
| Cl     | CV | 3        | 2 | 17              | 7                   | 59         | 1425.042          | 379.213        | -459.98029337 | -459.98029606 |
| Cl     | FC | 2        | 2 | 17              | 7                   | 27         | 0.228             | 0.149          | -459.60758420 | -459.60758889 |
| Cl     | FC | 3        | 2 | 17              | 7                   | 59         | 32.208            | 7.827          | -459.67773175 | -459.67773377 |
| F      | CV | 2        | 2 | 9               | 7                   | 18         | 0.151             | 0.102          | -99.56689266  | -99.56689790  |
| F      | CV | 3        | 2 | 9               | 7                   | 43         | 23.984            | 7.728          | -99.68255289  | -99.68255303  |
| F      | FC | 2        | 2 | 9               | 7                   | 18         | 0.076             | 0.058          | -99.53602701  | -99.53603209  |
| F      | FC | 3        | 2 | 9               | 7                   | 43         | 7.947             | 2.395          | -99.62751477  | -99.62751462  |
| N      | CV | 2        | 4 | 7               | 5                   | 18         | 0.048             | 0.037          | -54.51252755  | -54.51252802  |
| N      | CV | 3        | 4 | 7               | 5                   | 43         | 3.335             | 1.397          | -54.56775555  | -54.56775583  |
| N      | FC | 2        | 4 | 7               | 5                   | 18         | 0.012             | 0.01           | -54.48257329  | -54.48257367  |

| System | CV | Cardinal | M | N <sub>el</sub> | N <sub>val_el</sub> | Basis size | Time SDTQ(P), min | Time SDTQ, min | CCSDTQ        | CCSDTQ(P)     |
|--------|----|----------|---|-----------------|---------------------|------------|-------------------|----------------|---------------|---------------|
| N      | FC | 3        | 4 | 7               | 5                   | 43         | 0.415             | 0.224          | -54.51799349  | -54.51799359  |
| O      | CV | 2        | 3 | 8               | 6                   | 18         | 0.1               | 0.074          | -74.94639101  | -74.94639311  |
| O      | CV | 3        | 3 | 8               | 6                   | 43         | 8.518             | 3.233          | -75.03154270  | -75.03154310  |
| O      | FC | 2        | 3 | 8               | 6                   | 18         | 0.035             | 0.029          | -74.91606461  | -74.91606657  |
| O      | FC | 3        | 3 | 8               | 6                   | 43         | 1.949             | 0.848          | -74.97913418  | -74.97913435  |
| P      | CV | 2        | 4 | 15              | 5                   | 27         | 3.923             | 2.365          | -340.94376384 | -340.94376595 |
| P      | CV | 3        | 4 | 15              | 5                   | 59         | 569.292           | 158.274        | -341.11447361 | -341.11447646 |
| P      | FC | 2        | 4 | 15              | 5                   | 27         | 0.026             | 0.021          | -340.79480621 | -340.79480689 |
| P      | FC | 3        | 4 | 15              | 5                   | 59         | 1.465             | 0.664          | -340.82357567 | -340.82357684 |
| S      | CV | 2        | 3 | 16              | 6                   | 27         | 5.167             | 3.315          | -397.75679175 | -397.75679599 |
| S      | CV | 3        | 3 | 16              | 6                   | 59         | 786.623           | 262.657        | -397.95297474 | -397.95297673 |
| S      | FC | 2        | 3 | 16              | 6                   | 27         | 0.096             | 0.069          | -397.60640692 | -397.60640969 |
| S      | FC | 3        | 3 | 16              | 6                   | 59         | 7.423             | 2.564          | -397.65756535 | -397.65756651 |
| Si     | CV | 2        | 3 | 14              | 4                   | 27         | 3.874             | 2.455          | -289.05999414 | -289.05999474 |
| Si     | CV | 3        | 3 | 14              | 4                   | 59         | 485.817           | 144.855        | -289.22195921 | -289.22195973 |
| Si     | FC | 2        | 3 | 14              | 4                   | 27         | 0.012             | 0.012          | -288.91724952 | -288.91724952 |
| Si     | FC | 3        | 3 | 14              | 4                   | 59         | 0.309             | 0.309          | -288.93481545 | -288.93481545 |

Table S19. Raw data for SDTQP/nZ (n = D, T) computations. System name (System), core electrons treatment (CV), basis set cardinal number (Cardinal), multiplicity (M), total number of electrons ( $N_{\text{el}}$ ), number of valence electrons ( $N_{\text{val\_el}}$ ), number of basis functions (Basis size), time for SDTQP computation, (Time SDTQP), and energy in Hartree (CCSDTQP) are provided.

| System   | CV | Cardinal | M | $N_{\text{el}}$ | $N_{\text{val\_el}}$ | Basis size | Time SDTQP, min | CCSDTQP       |
|----------|----|----------|---|-----------------|----------------------|------------|-----------------|---------------|
| bh3      | CV | 2        | 1 | 8               | 6                    | 33         | 18.589          | -26.53916083  |
| bh3      | CV | 3        | 1 | 8               | 6                    | 85         | 5714.978        | -26.58485703  |
| bh3      | FC | 2        | 1 | 8               | 6                    | 33         | 2.512           | -26.51061806  |
| bh3      | FC | 3        | 1 | 8               | 6                    | 85         | 811.759         | -26.53958656  |
| ch2-sing | CV | 2        | 1 | 8               | 6                    | 28         | 9.359           | -39.05555089  |
| ch2-sing | CV | 3        | 1 | 8               | 6                    | 71         | 2605.35         | -39.11183520  |
| ch2-sing | FC | 2        | 1 | 8               | 6                    | 28         | 1.617           | -39.02581597  |
| ch2-sing | FC | 3        | 1 | 8               | 6                    | 71         | 198.975         | -39.06440400  |
| h2o      | CV | 2        | 1 | 10              | 8                    | 28         | 21.137          | -76.27890987  |
| h2o      | CV | 3        | 1 | 10              | 8                    | 71         | 8699.435        | -76.39052858  |
| h2o      | FC | 2        | 1 | 10              | 8                    | 28         | 6.642           | -76.24792386  |
| h2o      | FC | 3        | 1 | 10              | 8                    | 71         | 2172.404        | -76.33740995  |
| hf       | CV | 2        | 1 | 10              | 8                    | 23         | 5.685           | -100.26824396 |
| hf       | CV | 3        | 1 | 10              | 8                    | 57         | 3097.99         | -100.40081521 |
| hf       | FC | 2        | 1 | 10              | 8                    | 23         | 1.643           | -100.23705822 |
| hf       | FC | 3        | 1 | 10              | 8                    | 57         | 398.438         | -100.34542881 |
| B        | CV | 2        | 2 | 5               | 3                    | 18         | 0.03            | -24.61910091  |
| B        | CV | 3        | 2 | 5               | 3                    | 43         | 1.641           | -24.64322243  |
| B        | FC | 2        | 2 | 5               | 3                    | 18         | 0.003           | -24.59131471  |
| B        | FC | 3        | 2 | 5               | 3                    | 43         | 0.039           | -24.59953105  |
| C        | CV | 2        | 3 | 6               | 4                    | 18         | 0.065           | -37.79246889  |
| C        | CV | 3        | 3 | 6               | 4                    | 43         | 4.676           | -37.82984552  |
| C        | FC | 2        | 3 | 6               | 4                    | 18         | 0.007           | -37.76328615  |
| C        | FC | 3        | 3 | 6               | 4                    | 43         | 0.125           | -37.78312550  |
| F        | CV | 2        | 2 | 9               | 7                    | 18         | 0.488           | -99.56689834  |
| F        | CV | 3        | 2 | 9               | 7                    | 43         | 117.583         | -99.68255396  |
| F        | FC | 2        | 2 | 9               | 7                    | 18         | 0.161           | -99.53603252  |
| F        | FC | 3        | 2 | 9               | 7                    | 43         | 24.962          | -99.62751551  |
| O        | CV | 2        | 3 | 8               | 6                    | 18         | 0.289           | -74.94639362  |

| <b>System</b> | <b>CV</b> | <b>Cardinal</b> | <b>M</b> | <b>N<sub>el</sub></b> | <b>N<sub>val_el</sub></b> | <b>Basis size</b> | <b>Time SDTQP, min</b> | <b>CCSDTQP</b> |
|---------------|-----------|-----------------|----------|-----------------------|---------------------------|-------------------|------------------------|----------------|
| O             | CV        | 3               | 3        | 8                     | 6                         | 43                | 53.772                 | -75.03154369   |
| O             | FC        | 2               | 3        | 8                     | 6                         | 18                | 0.075                  | -74.91606707   |
| O             | FC        | 3               | 3        | 8                     | 6                         | 43                | 7.102                  | -74.97913487   |

Table S20. Raw data for SDT(Q)/anZ (n = D, T, Q) computations. System name (System), core electrons treatment (CV), basis set cardinal number (Cardinal), multiplicity (M), total number of electrons ( $N_{el}$ ), number of valence electrons ( $N_{val\_el}$ ), number of basis functions (Basis size), time for SDT(Q) computation, (Time SDT(Q)), time for SDT computation (Time SDT), and energy components in Hartree (HF, CCSD, CCSD(T), CCSDT, CCSDT(Q)) are provided.

| System   | CV | Cardinal | M | $N_{el}$ | $N_{val\_el}$ | Basis size | Time SDT(Q), min | Time SDT, min | HF            | CCSD          | CCSD(T)       | CCSDT         | CCSDT(Q)      |
|----------|----|----------|---|----------|---------------|------------|------------------|---------------|---------------|---------------|---------------|---------------|---------------|
| alh      | CV | 2        | 1 | 14       | 4             | 45         | 1.503            | 1.109         | -242.45548109 | -242.66273330 | -242.66579276 | -242.66616110 | -242.66616459 |
| alh      | CV | 3        | 1 | 14       | 4             | 98         | 39.457           | 14.962        | -242.46268591 | -242.82297802 | -242.82783768 | -242.82819533 | -242.82831966 |
| alh      | CV | 4        | 1 | 14       | 4             | 180        | 896.143          | 183.197       | -242.46426772 | -242.89567388 | -242.90153830 | -242.90186246 | -242.90199972 |
| alh      | FC | 2        | 1 | 14       | 4             | 45         | 0.083            | 0.068         | -242.45548109 | -242.53232752 | -242.53348638 | -242.53387284 | -242.53390959 |
| alh      | FC | 3        | 1 | 14       | 4             | 98         | 2.356            | 1.514         | -242.46268591 | -242.54615282 | -242.54766503 | -242.54804765 | -242.54810025 |
| alh      | FC | 4        | 1 | 14       | 4             | 180        | 38.853           | 16.526        | -242.46426772 | -242.54943023 | -242.55104711 | -242.55139833 | -242.55145555 |
| bh       | CV | 2        | 1 | 6        | 4             | 36         | 0.113            | 0.088         | -25.12657759  | -25.24555456  | -25.24741407  | -25.24786849  | -25.24793723  |
| bh       | CV | 3        | 1 | 6        | 4             | 82         | 2.845            | 1.575         | -25.13038518  | -25.27383952  | -25.27652113  | -25.27699235  | -25.27707277  |
| bh       | CV | 4        | 1 | 6        | 4             | 155        | 49.136           | 15.373        | -25.13140703  | -25.28187606  | -25.28471575  | -25.28515742  | -25.28524174  |
| bh       | FC | 2        | 1 | 6        | 4             | 36         | 0.054            | 0.044         | -25.12657759  | -25.21779143  | -25.21936076  | -25.21980269  | -25.21986210  |
| bh       | FC | 3        | 1 | 6        | 4             | 82         | 1.366            | 0.936         | -25.13038518  | -25.23039578  | -25.23255509  | -25.23298882  | -25.23305919  |
| bh       | FC | 4        | 1 | 6        | 4             | 155        | 21.855           | 10.716        | -25.13140703  | -25.23337958  | -25.23564339  | -25.23604564  | -25.23611881  |
| ch       | CV | 2        | 2 | 7        | 5             | 36         | 0.221            | 0.176         | -38.27558801  | -38.41668058  | -38.41930847  | -38.41992348  | -38.42001101  |
| ch       | CV | 3        | 2 | 7        | 5             | 82         | 5.359            | 3.053         | -38.28229881  | -38.45749747  | -38.46151677  | -38.46221035  | -38.46231017  |
| ch       | CV | 4        | 2 | 7        | 5             | 155        | 155.476          | 38.275        | -38.28401537  | -38.46834147  | -38.47262519  | -38.47327890  | -38.47338689  |
| ch       | FC | 2        | 2 | 7        | 5             | 36         | 0.109            | 0.09          | -38.27558801  | -38.38734668  | -38.38975547  | -38.39036295  | -38.39044027  |
| ch       | FC | 3        | 2 | 7        | 5             | 82         | 2.704            | 1.768         | -38.28229881  | -38.41093891  | -38.41454531  | -38.41521084  | -38.41529775  |
| ch       | FC | 4        | 2 | 7        | 5             | 155        | 67.296           | 22.809        | -38.28401537  | -38.41643006  | -38.42025208  | -38.42087428  | -38.42096804  |
| ch2-sing | CV | 2        | 1 | 8        | 6             | 45         | 0.518            | 0.385         | -38.88464723  | -39.05988815  | -39.06380956  | -39.06459827  | -39.06479204  |
| ch2-sing | CV | 3        | 1 | 8        | 6             | 105        | 15.206           | 6.57          | -38.89354886  | -39.10800337  | -39.11367936  | -39.11454655  | -39.11477029  |
| ch2-sing | CV | 4        | 1 | 8        | 6             | 201        | 382.731          | 84.074        | -38.89546774  | -39.12040422  | -39.12641846  | -39.12724848  | -39.12748784  |
| ch2-sing | FC | 2        | 1 | 8        | 6             | 45         | 0.277            | 0.207         | -38.88464723  | -39.03025287  | -39.03392788  | -39.03469423  | -39.03487679  |
| ch2-sing | FC | 3        | 1 | 8        | 6             | 105        | 8.68             | 4.034         | -38.89354886  | -39.06108225  | -39.06630403  | -39.06710954  | -39.06731930  |
| ch2-sing | FC | 4        | 1 | 8        | 6             | 201        | 204.95           | 47.414        | -38.89546774  | -39.06811105  | -39.07361865  | -39.07437948  | -39.07460331  |
| ch2-trip | CV | 2        | 3 | 8        | 6             | 45         | 0.566            | 0.4           | -38.92849911  | -39.07801388  | -39.08054598  | -39.08100732  | -39.08109032  |
| ch2-trip | CV | 3        | 3 | 8        | 6             | 105        | 19.12            | 7.809         | -38.93827206  | -39.12559389  | -39.12960314  | -39.13011532  | -39.13020580  |
| ch2-trip | CV | 4        | 3 | 8        | 6             | 201        | 503.273          | 110.58        | -38.94034843  | -39.13770144  | -39.14200991  | -39.14248347  | -39.14258319  |
| ch2-trip | FC | 2        | 3 | 8        | 6             | 45         | 0.28             | 0.205         | -38.92849911  | -39.04804992  | -39.05044169  | -39.05090138  | -39.05097806  |
| ch2-trip | FC | 3        | 3 | 8        | 6             | 105        | 9.383            | 4.33          | -38.93827206  | -39.07798149  | -39.08169896  | -39.08219852  | -39.08228149  |

| System   | CV | Cardinal | M | N <sub>el</sub> | N <sub>val,el</sub> | Basis size | Time SDT(Q), min | Time SDT, min | HF            | CCSD          | CCSD(T)       | CCSDT         | CCSDT(Q)      |
|----------|----|----------|---|-----------------|---------------------|------------|------------------|---------------|---------------|---------------|---------------|---------------|---------------|
| ch2-trip | FC | 4        | 3 | 8               | 6                   | 201        | 247.431          | 61.185        | -38.94034843  | -39.08465434  | -39.08862682  | -39.08908548  | -39.08917693  |
| h2o      | CV | 2        | 1 | 10              | 8                   | 45         | 0.765            | 0.545         | -76.04155800  | -76.30508411  | -76.31093082  | -76.31109633  | -76.31159572  |
| h2o      | CV | 3        | 1 | 10              | 8                   | 105        | 24.687           | 9.632         | -76.06068649  | -76.39050101  | -76.39983174  | -76.39986483  | -76.40029028  |
| h2o      | CV | 4        | 1 | 10              | 8                   | 201        | 641.382          | 123.166       | -76.06596896  | -76.41480779  | -76.42476010  | -76.42473376  | -76.42519480  |
| h2o      | FC | 2        | 1 | 10              | 8                   | 45         | 0.441            | 0.308         | -76.04155800  | -76.27412080  | -76.27979992  | -76.27996979  | -76.28045403  |
| h2o      | FC | 3        | 1 | 10              | 8                   | 105        | 13.9             | 5.416         | -76.06068649  | -76.33777859  | -76.34673569  | -76.34676509  | -76.34716651  |
| h2o      | FC | 4        | 1 | 10              | 8                   | 201        | 376.369          | 71.899        | -76.06596896  | -76.35590785  | -76.36543115  | -76.36539649  | -76.36583156  |
| hcl      | CV | 2        | 1 | 18              | 8                   | 45         | 2.394            | 1.759         | -460.09476058 | -460.42831169 | -460.43416628 | -460.43446913 | -460.43485721 |
| hcl      | CV | 3        | 1 | 18              | 8                   | 98         | 76.869           | 28.419        | -460.10884558 | -460.64090073 | -460.65244788 | -460.65285092 | -460.65331668 |
| hcl      | CV | 4        | 1 | 18              | 8                   | 180        | 1801.263         | 349.606       | -460.11212603 | -460.73491743 | -460.74807731 | -460.74843444 | -460.74896930 |
| hcl      | FC | 2        | 1 | 18              | 8                   | 45         | 0.277            | 0.194         | -460.09476058 | -460.27777380 | -460.28233558 | -460.28272600 | -460.28307238 |
| hcl      | FC | 3        | 1 | 18              | 8                   | 98         | 8.575            | 3.566         | -460.10884558 | -460.34000631 | -460.34909291 | -460.34964278 | -460.35001680 |
| hcl      | FC | 4        | 1 | 18              | 8                   | 180        | 180.33           | 37.466        | -460.11212603 | -460.35779571 | -460.36788404 | -460.36838027 | -460.36881410 |
| hf       | CV | 2        | 1 | 10              | 8                   | 36         | 0.306            | 0.235         | -100.03353372 | -100.29848065 | -100.30325500 | -100.30338454 | -100.30374110 |
| hf       | CV | 3        | 1 | 10              | 8                   | 82         | 7.668            | 3.657         | -100.06113323 | -100.40317292 | -100.41140739 | -100.41138968 | -100.41167700 |
| hf       | CV | 4        | 1 | 10              | 8                   | 155        | 160.224          | 40.183        | -100.06857916 | -100.43339796 | -100.44225124 | -100.44217862 | -100.44250529 |
| hf       | FC | 2        | 1 | 10              | 8                   | 36         | 0.173            | 0.131         | -100.03353372 | -100.26727864 | -100.27190975 | -100.27204500 | -100.27238810 |
| hf       | FC | 3        | 1 | 10              | 8                   | 82         | 4.668            | 2.206         | -100.06113323 | -100.34813366 | -100.35603227 | -100.35602474 | -100.35628632 |
| hf       | FC | 4        | 1 | 10              | 8                   | 155        | 92.788           | 22.396        | -100.06857916 | -100.37175751 | -100.38022072 | -100.38015659 | -100.38045515 |
| hs       | CV | 2        | 2 | 17              | 7                   | 45         | 3.318            | 2.607         | -398.09441097 | -398.39109235 | -398.39617609 | -398.39671186 | -398.39696714 |
| hs       | CV | 3        | 2 | 17              | 7                   | 98         | 95.407           | 42.979        | -398.10734459 | -398.58213699 | -398.59164030 | -398.59238782 | -398.59273593 |
| hs       | CV | 4        | 2 | 17              | 7                   | 180        | 2892.256         | 643.921       | -398.11029898 | -398.67021115 | -398.68112550 | -398.68182695 | -398.68222900 |
| hs       | FC | 2        | 2 | 17              | 7                   | 45         | 0.309            | 0.227         | -398.09441097 | -398.24111191 | -398.24485236 | -398.24547101 | -398.24568844 |
| hs       | FC | 3        | 2 | 17              | 7                   | 98         | 9.207            | 4.264         | -398.10734459 | -398.28859321 | -398.29558140 | -398.29645589 | -398.29671481 |
| hs       | FC | 4        | 2 | 17              | 7                   | 180        | 300.002          | 57.362        | -398.11029898 | -398.30056852 | -398.30831279 | -398.30913383 | -398.30943852 |
| nh       | CV | 2        | 3 | 8               | 6                   | 36         | 0.272            | 0.216         | -54.97218218  | -55.13719904  | -55.13999073  | -55.14042035  | -55.14054961  |
| nh       | CV | 3        | 3 | 8               | 6                   | 82         | 6.534            | 3.551         | -54.98270341  | -55.19320968  | -55.19790517  | -55.19839909  | -55.19852795  |
| nh       | CV | 4        | 3 | 8               | 6                   | 155        | 126.354          | 39.409        | -54.98559399  | -55.20793548  | -55.21299750  | -55.21344963  | -55.21359171  |
| nh       | FC | 2        | 3 | 8               | 6                   | 36         | 0.136            | 0.11          | -54.97218218  | -55.10696499  | -55.10961180  | -55.11004192  | -55.11016214  |
| nh       | FC | 3        | 3 | 8               | 6                   | 82         | 3.421            | 2.04          | -54.98270341  | -55.14352703  | -55.14790847  | -55.14839610  | -55.14851113  |
| nh       | FC | 4        | 3 | 8               | 6                   | 155        | 62.711           | 21.93         | -54.98559399  | -55.15250543  | -55.15720704  | -55.15765082  | -55.15777777  |
| nh2      | CV | 2        | 2 | 9               | 7                   | 45         | 0.913            | 0.686         | -55.57536280  | -55.78223614  | -55.78658319  | -55.78702260  | -55.78727328  |
| nh2      | CV | 3        | 2 | 9               | 7                   | 105        | 27.308           | 12.066        | -55.58821629  | -55.84622498  | -55.85299550  | -55.85343049  | -55.85367149  |

| System | CV | Cardinal | M | N <sub>el</sub> | N <sub>val,el</sub> | Basis size | Time SDT(Q), min | Time SDT, min | HF            | CCSD          | CCSD(T)       | CCSDT         | CCSDT(Q)      |
|--------|----|----------|---|-----------------|---------------------|------------|------------------|---------------|---------------|---------------|---------------|---------------|---------------|
| nh2    | CV | 4        | 2 | 9               | 7                   | 201        | 1111.904         | 204.276       | -55.59139345  | -55.86310138  | -55.87032445  | -55.87070844  | -55.87096908  |
| nh2    | FC | 2        | 2 | 9               | 7                   | 45         | 0.503            | 0.373         | -55.57536280  | -55.75167762  | -55.75585724  | -55.75629677  | -55.75653626  |
| nh2    | FC | 3        | 2 | 9               | 7                   | 105        | 15.71            | 6.99          | -55.58821629  | -55.79620765  | -55.80262057  | -55.80304157  | -55.80326730  |
| nh2    | FC | 4        | 2 | 9               | 7                   | 201        | 624.884          | 116.119       | -55.59139345  | -55.80732192  | -55.81413648  | -55.81450243  | -55.81474652  |
| oh     | CV | 2        | 2 | 9               | 7                   | 36         | 0.378            | 0.303         | -75.40377876  | -75.61690549  | -75.62074107  | -75.62106853  | -75.62132204  |
| oh     | CV | 3        | 2 | 9               | 7                   | 82         | 9.022            | 4.997         | -75.42176498  | -75.69632995  | -75.70282216  | -75.70314567  | -75.70337016  |
| oh     | CV | 4        | 2 | 9               | 7                   | 155        | 288.736          | 67.362        | -75.42666849  | -75.71833565  | -75.72532780  | -75.72560696  | -75.72585689  |
| oh     | FC | 2        | 2 | 9               | 7                   | 36         | 0.206            | 0.161         | -75.40377876  | -75.58627307  | -75.58995746  | -75.59028736  | -75.59052968  |
| oh     | FC | 3        | 2 | 9               | 7                   | 82         | 5.298            | 2.914         | -75.42176498  | -75.64397659  | -75.65013050  | -75.65045324  | -75.65065780  |
| oh     | FC | 4        | 2 | 9               | 7                   | 155        | 162.604          | 38.005        | -75.42666849  | -75.65981935  | -75.66642201  | -75.66669795  | -75.66692612  |
| sih    | CV | 2        | 2 | 15              | 5                   | 45         | 2.535            | 1.977         | -289.43190008 | -289.66743489 | -289.67117241 | -289.67178300 | -289.67185820 |
| sih    | CV | 3        | 2 | 15              | 5                   | 98         | 68.671           | 30.956        | -289.44032345 | -289.83107605 | -289.83724928 | -289.83799792 | -289.83817689 |
| sih    | CV | 4        | 2 | 15              | 5                   | 180        | 2113.153         | 460.531       | -289.44247034 | -289.90628909 | -289.91350852 | -289.91419969 | -289.91439817 |
| sih    | FC | 2        | 2 | 15              | 5                   | 45         | 0.169            | 0.135         | -289.43190008 | -289.52580878 | -289.52793775 | -289.52860897 | -289.52866953 |
| sih    | FC | 3        | 2 | 15              | 5                   | 98         | 4.6              | 2.746         | -289.44032345 | -289.54661828 | -289.54985321 | -289.55067862 | -289.55076931 |
| sih    | FC | 4        | 2 | 15              | 5                   | 180        | 122.957          | 34.333        | -289.44247034 | -289.55177038 | -289.55527085 | -289.55603481 | -289.55613716 |
| Al     | CV | 2        | 2 | 13              | 3                   | 36         | 0.442            | 0.3           | -241.87427740 | -242.05308553 | -242.05566446 | -242.05604412 | -242.05602075 |
| Al     | CV | 3        | 2 | 13              | 3                   | 75         | 14.184           | 3.992         | -241.87924597 | -242.20777522 | -242.21216352 | -242.21258500 | -242.21267706 |
| Al     | CV | 4        | 2 | 13              | 3                   | 134        | 197.118          | 30.6          | -241.88050267 | -242.27937609 | -242.28474957 | -242.28512684 | -242.28522971 |
| Al     | FC | 2        | 2 | 13              | 3                   | 36         | 0.011            | 0.011         | -241.87427740 | -241.92254684 | -241.92336853 | -241.92378883 | -241.92378883 |
| Al     | FC | 3        | 2 | 13              | 3                   | 75         | 0.231            | 0.231         | -241.87924597 | -241.93067732 | -241.93188003 | -241.93237202 | -241.93237202 |
| Al     | FC | 4        | 2 | 13              | 3                   | 134        | 2.44             | 2.44          | -241.88050267 | -241.93282379 | -241.93412574 | -241.93457728 | -241.93457728 |
| B      | CV | 2        | 2 | 5               | 3                   | 27         | 0.033            | 0.024         | -24.53058146  | -24.61925669  | -24.62042882  | -24.62083353  | -24.62084563  |
| B      | CV | 3        | 2 | 5               | 3                   | 59         | 0.594            | 0.28          | -24.53221572  | -24.64124940  | -24.64309205  | -24.64354614  | -24.64355990  |
| B      | CV | 4        | 2 | 5               | 3                   | 109        | 7.317            | 2.435         | -24.53300052  | -24.64803008  | -24.64999865  | -24.65042118  | -24.65043602  |
| B      | FC | 2        | 2 | 5               | 3                   | 27         | 0.007            | 0.007         | -24.53058146  | -24.59166843  | -24.59260484  | -24.59300528  | -24.59300528  |
| B      | FC | 3        | 2 | 5               | 3                   | 59         | 0.123            | 0.123         | -24.53221572  | -24.59802583  | -24.59943095  | -24.59986877  | -24.59986877  |
| B      | FC | 4        | 2 | 5               | 3                   | 109        | 1.229            | 1.229         | -24.53300052  | -24.59976827  | -24.60125406  | -24.60166054  | -24.60166054  |
| C      | CV | 2        | 3 | 6               | 4                   | 27         | 0.03             | 0.023         | -37.68779748  | -37.79512520  | -37.79661340  | -37.79700823  | -37.79704938  |
| C      | CV | 3        | 3 | 6               | 4                   | 59         | 0.601            | 0.309         | -37.69187228  | -37.82769652  | -37.83030273  | -37.83080966  | -37.83086191  |
| C      | CV | 4        | 3 | 6               | 4                   | 109        | 10.229           | 2.877         | -37.69337496  | -37.83678361  | -37.83960660  | -37.84007295  | -37.84012945  |
| C      | FC | 2        | 3 | 6               | 4                   | 27         | 0.013            | 0.011         | -37.68779748  | -37.76604417  | -37.76735810  | -37.76775081  | -37.76778166  |
| C      | FC | 3        | 3 | 6               | 4                   | 59         | 0.22             | 0.168         | -37.69187228  | -37.78133785  | -37.78360750  | -37.78410502  | -37.78414388  |

| System | CV | Cardinal | M | N <sub>el</sub> | N <sub>val,el</sub> | Basis size | Time SDT(Q), min | Time SDT, min | HF            | CCSD          | CCSD(T)       | CCSDT         | CCSDT(Q)      |
|--------|----|----------|---|-----------------|---------------------|------------|------------------|---------------|---------------|---------------|---------------|---------------|---------------|
| C      | FC | 4        | 3 | 6               | 4                   | 109        | 2.805            | 1.699         | -37.69337496  | -37.78507276  | -37.78751701  | -37.78797281  | -37.78801478  |
| Cl     | CV | 2        | 2 | 17              | 7                   | 36         | 0.816            | 0.576         | -459.47321127 | -459.76837596 | -459.77231850 | -459.77266836 | -459.77292057 |
| Cl     | CV | 3        | 2 | 17              | 7                   | 75         | 26.914           | 8.949         | -459.48623678 | -459.97498958 | -459.98403215 | -459.98463268 | -459.98492399 |
| Cl     | CV | 4        | 2 | 17              | 7                   | 134        | 372.251          | 63.766        | -459.48932510 | -460.06710139 | -460.07765656 | -460.07823249 | -460.07858218 |
| Cl     | FC | 2        | 2 | 17              | 7                   | 36         | 0.078            | 0.052         | -459.47321127 | -459.61810946 | -459.62086545 | -459.62128775 | -459.62150407 |
| Cl     | FC | 3        | 2 | 17              | 7                   | 75         | 2.781            | 0.829         | -459.48623678 | -459.67447736 | -459.68117842 | -459.68191398 | -459.68212137 |
| Cl     | FC | 4        | 2 | 17              | 7                   | 134        | 43.318           | 7.107         | -459.48932510 | -459.69029045 | -459.69790115 | -459.69860791 | -459.69886512 |
| F      | CV | 2        | 2 | 9               | 7                   | 27         | 0.076            | 0.056         | -99.38113528  | -99.58656768  | -99.58927299  | -99.58946436  | -99.58954758  |
| F      | CV | 3        | 2 | 9               | 7                   | 59         | 1.588            | 0.742         | -99.40694448  | -99.68471552  | -99.68966804  | -99.68986741  | -99.68996411  |
| F      | CV | 4        | 2 | 9               | 7                   | 109        | 20.4             | 5.543         | -99.41411220  | -99.71226537  | -99.71767032  | -99.71783977  | -99.71795947  |
| F      | FC | 2        | 2 | 9               | 7                   | 27         | 0.042            | 0.032         | -99.38113528  | -99.55566983  | -99.55825840  | -99.55845162  | -99.55852701  |
| F      | FC | 3        | 2 | 9               | 7                   | 59         | 0.896            | 0.415         | -99.40694448  | -99.62996581  | -99.63464201  | -99.63484622  | -99.63492615  |
| F      | FC | 4        | 2 | 9               | 7                   | 109        | 12.049           | 3.359         | -99.41411220  | -99.65091865  | -99.65599963  | -99.65617314  | -99.65627449  |
| N      | CV | 2        | 4 | 7               | 5                   | 27         | 0.033            | 0.025         | -54.39326499  | -54.51936825  | -54.52083635  | -54.52108144  | -54.52113024  |
| N      | CV | 3        | 4 | 7               | 5                   | 59         | 0.684            | 0.327         | -54.40121154  | -54.56650328  | -54.56945176  | -54.56981437  | -54.56987525  |
| N      | CV | 4        | 4 | 7               | 5                   | 109        | 8.795            | 2.658         | -54.40383912  | -54.57885619  | -54.58210609  | -54.58243160  | -54.58250025  |
| N      | FC | 2        | 4 | 7               | 5                   | 27         | 0.015            | 0.012         | -54.39326499  | -54.48941856  | -54.49077590  | -54.49102116  | -54.49106260  |
| N      | FC | 3        | 4 | 7               | 5                   | 59         | 0.253            | 0.16          | -54.40121154  | -54.51700331  | -54.51970513  | -54.52006848  | -54.52011701  |
| N      | FC | 4        | 4 | 7               | 5                   | 109        | 3.188            | 1.608         | -54.40383912  | -54.52360772  | -54.52657074  | -54.52689644  | -54.52695161  |
| O      | CV | 2        | 3 | 8               | 6                   | 27         | 0.078            | 0.052         | -74.79669729  | -74.95981945  | -74.96191746  | -74.96218153  | -74.96225420  |
| O      | CV | 3        | 3 | 8               | 6                   | 59         | 1.82             | 0.695         | -74.81306194  | -75.03212611  | -75.03604535  | -75.03638860  | -75.03646986  |
| O      | CV | 4        | 3 | 8               | 6                   | 109        | 24.768           | 5.123         | -74.81765587  | -75.05157727  | -75.05587043  | -75.05618387  | -75.05628007  |
| O      | FC | 2        | 3 | 8               | 6                   | 27         | 0.039            | 0.028         | -74.79669729  | -74.92948767  | -74.93146673  | -74.93173120  | -74.93179660  |
| O      | FC | 3        | 3 | 8               | 6                   | 59         | 0.872            | 0.381         | -74.81306194  | -74.98001204  | -74.98365889  | -74.98400274  | -74.98406948  |
| O      | FC | 4        | 3 | 8               | 6                   | 109        | 11.729           | 3.099         | -74.81765587  | -74.99330259  | -74.99727854  | -74.99759165  | -74.99767199  |
| P      | CV | 2        | 4 | 15              | 5                   | 36         | 0.498            | 0.34          | -340.71016765 | -340.94616649 | -340.94918620 | -340.94954381 | -340.94969647 |
| P      | CV | 3        | 4 | 15              | 5                   | 75         | 10.874           | 4.202         | -340.71661072 | -341.10817891 | -341.11487930 | -341.11556854 | -341.11580594 |
| P      | CV | 4        | 4 | 15              | 5                   | 134        | 155.353          | 31.887        | -340.71884321 | -341.18725878 | -341.19515753 | -341.19575842 | -341.19602932 |
| P      | FC | 2        | 4 | 15              | 5                   | 36         | 0.023            | 0.019         | -340.71016765 | -340.79804231 | -340.79976016 | -340.80018854 | -340.80029863 |
| P      | FC | 3        | 4 | 15              | 5                   | 75         | 0.534            | 0.323         | -340.71661072 | -340.81959695 | -340.82378954 | -340.82461810 | -340.82475561 |
| P      | FC | 4        | 4 | 15              | 5                   | 134        | 6.704            | 2.931         | -340.71884321 | -340.82468726 | -340.82939359 | -340.83012866 | -340.83029077 |
| S      | CV | 2        | 3 | 16              | 6                   | 36         | 0.957            | 0.61          | -397.49920841 | -397.76353323 | -397.76707106 | -397.76749471 | -397.76768745 |
| S      | CV | 3        | 3 | 16              | 6                   | 75         | 23.368           | 7.633         | -397.51015949 | -397.94723688 | -397.95498440 | -397.95570600 | -397.95595351 |



| System | CV | Cardinal | M | N <sub>el</sub> | N <sub>val,el</sub> | Basis size | Time SDT(Q), min | Time SDT, min | HF            | CCSD          | CCSD(T)       | CCSDT         | CCSDT(Q)      |
|--------|----|----------|---|-----------------|---------------------|------------|------------------|---------------|---------------|---------------|---------------|---------------|---------------|
| S      | CV | 4        | 3 | 16              | 6                   | 134        | 317.555          | 57.716        | -397.51285896 | -398.03332728 | -398.04242292 | -398.04310858 | -398.04340549 |
| S      | FC | 2        | 3 | 16              | 6                   | 36         | 0.076            | 0.05          | -397.49920841 | -397.61380121 | -397.61609563 | -397.61659337 | -397.61674735 |
| S      | FC | 3        | 3 | 16              | 6                   | 75         | 1.858            | 0.682         | -397.51015949 | -397.65402603 | -397.65936318 | -397.66021417 | -397.66037140 |
| S      | FC | 4        | 3 | 16              | 6                   | 134        | 25.374           | 5.553         | -397.51285896 | -397.66395720 | -397.66999715 | -397.67080773 | -397.67100610 |
| Si     | CV | 2        | 3 | 14              | 4                   | 36         | 0.684            | 0.41          | -288.85117655 | -289.06024460 | -289.06311754 | -289.06356653 | -289.06363535 |
| Si     | CV | 3        | 3 | 14              | 4                   | 75         | 16.826           | 5.009         | -288.85676433 | -289.21649486 | -289.22195337 | -289.22262846 | -289.22279776 |
| Si     | CV | 4        | 3 | 14              | 4                   | 134        | 227.017          | 35.887        | -288.85855950 | -289.29012855 | -289.29663082 | -289.29722769 | -289.29741479 |
| Si     | FC | 2        | 3 | 14              | 4                   | 36         | 0.025            | 0.021         | -288.85117655 | -288.91859516 | -288.91996922 | -288.92048381 | -288.92052965 |
| Si     | FC | 3        | 3 | 14              | 4                   | 75         | 0.549            | 0.36          | -288.85676433 | -288.93203158 | -288.93466753 | -288.93545584 | -288.93552217 |
| Si     | FC | 4        | 3 | 14              | 4                   | 134        | 6.141            | 3.3           | -288.85855950 | -288.93556412 | -288.93847507 | -288.93918284 | -288.93925732 |

Table S21. Raw data for SDT(Q)/nZ (n = D, T, Q) computations. The geometries were optimized using SD(T)/nZ method with the basis set and frozen core approximation type corresponding to the given energy evaluation (FC-SD(T) for the FC single-point computation and CV-SD(T) for the CV one). System name (System), core electrons treatment (CV), basis set cardinal number (Cardinal), multiplicity (M), total number of electrons ( $N_{el}$ ), number of valence electrons ( $N_{val_{el}}$ ), number of basis functions (Basis size), time for SDT(Q) computation, (Time SDT(Q)), time for SDT computation (Time SDT), and energy components in Hartree (HF, CCSD, CCSD(T), CCSDT, CCSDT(Q)) are provided.

| System | CV | Cardinal | M | $N_{el}$ | $N_{val_{el}}$ | Basis size | Time SDT(Q), min | Time SDT, min | HF            | CCSD          | CCSD(T)       | CCSDT         | CCSDT(Q)      |
|--------|----|----------|---|----------|----------------|------------|------------------|---------------|---------------|---------------|---------------|---------------|---------------|
| alh    | CV | 2        | 1 | 14       | 4              | 32         | 0.528            | 0.408         | -242.45506481 | -242.65895817 | -242.66184896 | -242.66218621 | -242.66218217 |
| alh    | CV | 3        | 1 | 14       | 4              | 73         | 16.506           | 6.948         | -242.46258338 | -242.82196897 | -242.82675183 | -242.82710025 | -242.82721962 |
| alh    | CV | 4        | 1 | 14       | 4              | 139        | 337.848          | 63.11         | -242.46424330 | -242.89537597 | -242.90121196 | -242.90153948 | -242.90167517 |
| alh    | FC | 2        | 1 | 14       | 4              | 32         | 0.02             | 0.017         | -242.45506621 | -242.52920323 | -242.53022997 | -242.53058416 | -242.53061436 |
| alh    | FC | 3        | 1 | 14       | 4              | 73         | 0.893            | 0.584         | -242.46258117 | -242.54532245 | -242.54676770 | -242.54714035 | -242.54718922 |
| alh    | FC | 4        | 1 | 14       | 4              | 139        | 15.069           | 6.367         | -242.46423992 | -242.54919731 | -242.55078984 | -242.55114493 | -242.55120087 |
| bf     | CV | 2        | 1 | 14       | 10             | 36         | 0.918            | 0.677         | -124.10759579 | -124.44277369 | -124.44986908 | -124.45023790 | -124.45085668 |
| bf     | CV | 3        | 1 | 14       | 10             | 86         | 36.42            | 14.54         | -124.15698939 | -124.59851553 | -124.61080397 | -124.61103144 | -124.61157541 |
| bf     | CV | 4        | 1 | 14       | 10             | 168        | 978.41           | 172.641       | -124.16615481 | -124.64022575 | -124.65378564 | -124.65393622 | -124.65453641 |
| bf     | FC | 2        | 1 | 14       | 10             | 36         | 0.35             | 0.253         | -124.10755118 | -124.38388800 | -124.39062828 | -124.39098176 | -124.39157653 |
| bf     | FC | 3        | 1 | 14       | 10             | 86         | 14.769           | 5.583         | -124.15686037 | -124.49958036 | -124.51109876 | -124.51128606 | -124.51179208 |
| bf     | FC | 4        | 1 | 14       | 10             | 168        | 394.273          | 66.505        | -124.16600393 | -124.52949036 | -124.54217483 | -124.54228197 | -124.54283916 |
| bh     | CV | 2        | 1 | 6        | 4              | 23         | 0.028            | 0.022         | -25.12539651  | -25.24268233  | -25.24439162  | -25.24481577  | -25.24487661  |
| bh     | CV | 3        | 1 | 6        | 4              | 57         | 0.922            | 0.496         | -25.13011366  | -25.27312399  | -25.27575035  | -25.27621390  | -25.27629068  |
| bh     | CV | 4        | 1 | 6        | 4              | 114        | 18.314           | 5.543         | -25.13135590  | -25.28165787  | -25.28447517  | -25.28491982  | -25.28500274  |
| bh     | FC | 2        | 1 | 6        | 4              | 23         | 0.013            | 0.011         | -25.12538601  | -25.21505741  | -25.21648534  | -25.21689783  | -25.21695004  |
| bh     | FC | 3        | 1 | 6        | 4              | 57         | 0.431            | 0.3           | -25.13008909  | -25.22969046  | -25.23179598  | -25.23222201  | -25.23228906  |
| bh     | FC | 4        | 1 | 6        | 4              | 114        | 7.122            | 3.651         | -25.13132917  | -25.23315977  | -25.23540314  | -25.23580870  | -25.23588059  |
| bh3    | CV | 2        | 1 | 8        | 6              | 33         | 0.184            | 0.131         | -26.39127217  | -26.53733477  | -26.53911323  | -26.53947668  | -26.53951489  |
| bh3    | CV | 3        | 1 | 8        | 6              | 85         | 16.586           | 5.682         | -26.40044593  | -26.58147718  | -26.58437868  | -26.58480678  | -26.58485321  |
| bh3    | CV | 4        | 1 | 8        | 6              | 174        | 757.073          | 90.93         | -26.40217395  | -26.59279459  | -26.59594302  | -26.59634771  | -26.59640233  |
| bh3    | FC | 2        | 1 | 8        | 6              | 33         | 0.164            | 0.128         | -26.39125711  | -26.50897020  | -26.51060578  | -26.51096303  | -26.51099809  |
| bh3    | FC | 3        | 1 | 8        | 6              | 85         | 8.516            | 3.3           | -26.40043137  | -26.53652599  | -26.53913264  | -26.53953964  | -26.53958364  |
| bh3    | FC | 4        | 1 | 8        | 6              | 174        | 383.878          | 52.436        | -26.40216193  | -26.54263541  | -26.54544460  | -26.54582683  | -26.54587857  |
| cf     | CV | 2        | 2 | 15       | 11             | 36         | 1.971            | 1.605         | -137.17999475 | -137.53908813 | -137.54732170 | -137.54794583 | -137.54858557 |
| cf     | CV | 3        | 2 | 15       | 11             | 86         | 65.735           | 27.816        | -137.22546512 | -137.70192845 | -137.71627024 | -137.71682231 | -137.71743168 |
| cf     | CV | 4        | 2 | 15       | 11             | 168        | 1682.503         | 360.479       | -137.23585138 | -137.74697926 | -137.76282053 | -137.76330368 | -137.76398383 |

| System   | CV | Cardinal | M | N <sub>el</sub> | N <sub>val_el</sub> | Basis size | Time SDT(Q), min | Time SDT, min | HF            | CCSD          | CCSD(T)       | CCSDT         | CCSDT(Q)      |
|----------|----|----------|---|-----------------|---------------------|------------|------------------|---------------|---------------|---------------|---------------|---------------|---------------|
| cf       | FC | 2        | 2 | 15              | 11                  | 36         | 0.473            | 0.396         | -137.17994603 | -137.47885326 | -137.48676280 | -137.48738208 | -137.48799671 |
| cf       | FC | 3        | 2 | 15              | 11                  | 86         | 29.481           | 12.52         | -137.22536587 | -137.60033757 | -137.61394537 | -137.61447096 | -137.61503755 |
| cf       | FC | 4        | 2 | 15              | 11                  | 168        | 744.024          | 140.005       | -137.23573823 | -137.63340158 | -137.64840164 | -137.64885519 | -137.64948565 |
| ch       | CV | 2        | 2 | 7               | 5                   | 23         | 0.069            | 0.058         | -38.27247979  | -38.40996861  | -38.41212869  | -38.41264187  | -38.41271457  |
| ch       | CV | 3        | 2 | 7               | 5                   | 57         | 2.034            | 1.23          | -38.28151232  | -38.45547206  | -38.45929150  | -38.45995122  | -38.46004043  |
| ch       | CV | 4        | 2 | 7               | 5                   | 114        | 37.844           | 10.936        | -38.28380427  | -38.46765245  | -38.47186059  | -38.47251350  | -38.47261669  |
| ch       | FC | 2        | 2 | 7               | 5                   | 23         | 0.035            | 0.031         | -38.27246075  | -38.38078317  | -38.38273620  | -38.38324161  | -38.38330644  |
| ch       | FC | 3        | 2 | 7               | 5                   | 57         | 0.983            | 0.677         | -38.28148434  | -38.40891888  | -38.41233081  | -38.41296192  | -38.41303995  |
| ch       | FC | 4        | 2 | 7               | 5                   | 114        | 15.89            | 6.358         | -38.28377380  | -38.41573488  | -38.41948526  | -38.42010682  | -38.42019643  |
| ch2-sing | CV | 2        | 1 | 8               | 6                   | 28         | 0.11             | 0.086         | -38.88086049  | -39.05171853  | -39.05505552  | -39.05577284  | -39.05593734  |
| ch2-sing | CV | 3        | 1 | 8               | 6                   | 71         | 4.465            | 2.046         | -38.89254771  | -39.10532609  | -39.11073858  | -39.11159396  | -39.11179960  |
| ch2-sing | CV | 4        | 1 | 8               | 6                   | 144        | 116.382          | 23.954        | -38.89520977  | -39.11949521  | -39.12540448  | -39.12624483  | -39.12647631  |
| ch2-sing | FC | 2        | 1 | 8               | 6                   | 28         | 0.056            | 0.044         | -38.88081905  | -39.02229011  | -39.02538898  | -39.02608299  | -39.02623837  |
| ch2-sing | FC | 3        | 1 | 8               | 6                   | 71         | 2.369            | 1.188         | -38.89248904  | -39.05842329  | -39.06338823  | -39.06417940  | -39.06437262  |
| ch2-sing | FC | 4        | 1 | 8               | 6                   | 144        | 59.226           | 14.272        | -38.89514649  | -39.06719512  | -39.07260444  | -39.07337382  | -39.07359034  |
| ch2-trip | CV | 2        | 3 | 8               | 6                   | 28         | 0.151            | 0.12          | -38.92690162  | -39.07217750  | -39.07421846  | -39.07459884  | -39.07467462  |
| ch2-trip | CV | 3        | 3 | 8               | 6                   | 71         | 5.765            | 2.58          | -38.93793509  | -39.12378128  | -39.12758543  | -39.12807201  | -39.12815187  |
| ch2-trip | CV | 4        | 3 | 8               | 6                   | 144        | 157.703          | 29.687        | -38.94028303  | -39.13710919  | -39.14134081  | -39.14181533  | -39.14191071  |
| ch2-trip | FC | 2        | 3 | 8               | 6                   | 28         | 0.045            | 0.037         | -38.92688030  | -39.04241223  | -39.04432104  | -39.04469967  | -39.04477058  |
| ch2-trip | FC | 3        | 3 | 8               | 6                   | 71         | 2.73             | 1.485         | -38.93791348  | -39.07618279  | -39.07970186  | -39.08017587  | -39.08024951  |
| ch2-trip | FC | 4        | 3 | 8               | 6                   | 144        | 70.724           | 16.622        | -38.94026008  | -39.08405446  | -39.08795594  | -39.08841631  | -39.08850397  |
| ch3      | CV | 2        | 2 | 9               | 7                   | 33         | 0.655            | 0.524         | -39.56397316  | -39.74626635  | -39.74925885  | -39.74966352  | -39.74978204  |
| ch3      | CV | 3        | 2 | 9               | 7                   | 85         | 32.493           | 12.223        | -39.57777943  | -39.80604244  | -39.81123495  | -39.81170560  | -39.81182609  |
| ch3      | CV | 4        | 2 | 9               | 7                   | 174        | 1372.48          | 198.768       | -39.58041428  | -39.82121774  | -39.82692759  | -39.82737265  | -39.82751443  |
| ch3      | FC | 2        | 2 | 9               | 7                   | 33         | 0.332            | 0.265         | -39.56394254  | -39.71617973  | -39.71901573  | -39.71941626  | -39.71952853  |
| ch3      | FC | 3        | 2 | 9               | 7                   | 85         | 17.693           | 6.537         | -39.57774381  | -39.75808656  | -39.76295259  | -39.76340237  | -39.76351681  |
| ch3      | FC | 4        | 2 | 9               | 7                   | 174        | 762.804          | 101.646       | -39.58037545  | -39.76778568  | -39.77311982  | -39.77354098  | -39.77367545  |
| cn       | CV | 2        | 2 | 13              | 9                   | 36         | 1.063            | 0.915         | -92.21288843  | -92.54349675  | -92.55752528  | -92.56023160  | -92.56244733  |
| cn       | CV | 3        | 2 | 13              | 9                   | 86         | 52.882           | 25.859        | -92.23590032  | -92.65022222  | -92.67030792  | -92.67270090  | -92.67515355  |
| cn       | CV | 4        | 2 | 13              | 9                   | 168        | 1247.397         | 300.074       | -92.24154595  | -92.68032292  | -92.70168064  | -92.70389156  | -92.70644781  |
| cn       | FC | 2        | 2 | 13              | 9                   | 36         | 0.363            | 0.309         | -92.21282507  | -92.48375212  | -92.49727206  | -92.49994851  | -92.50211314  |
| cn       | FC | 3        | 2 | 13              | 9                   | 86         | 19.942           | 9.416         | -92.23574144  | -92.55299177  | -92.57208287  | -92.57437395  | -92.57677393  |
| cn       | FC | 4        | 2 | 13              | 9                   | 168        | 483.709          | 108.878       | -92.24137441  | -92.57182076  | -92.59207033  | -92.59416845  | -92.59666884  |

| System | CV | Cardinal | M | N <sub>el</sub> | N <sub>val_el</sub> | Basis size | Time SDT(Q), min | Time SDT, min | HF            | CCSD          | CCSD(T)       | CCSDT         | CCSDT(Q)      |
|--------|----|----------|---|-----------------|---------------------|------------|------------------|---------------|---------------|---------------|---------------|---------------|---------------|
| co     | CV | 2        | 1 | 14              | 10                  | 36         | 0.979            | 0.718         | -112.74830388 | -113.11309986 | -113.12534435 | -113.12569583 | -113.12683552 |
| co     | CV | 3        | 1 | 14              | 10                  | 86         | 36.044           | 13.122        | -112.78112978 | -113.24593946 | -113.26442684 | -113.26454369 | -113.26574162 |
| co     | CV | 4        | 1 | 14              | 10                  | 168        | 962.525          | 163.759       | -112.78900821 | -113.28356208 | -113.30335674 | -113.30336787 | -113.30464938 |
| co     | FC | 2        | 1 | 14              | 10                  | 36         | 0.383            | 0.273         | -112.74818495 | -113.05298985 | -113.06486418 | -113.06520763 | -113.06631360 |
| co     | FC | 3        | 1 | 14              | 10                  | 86         | 15.205           | 5.459         | -112.78084289 | -113.14616260 | -113.16383012 | -113.16389183 | -113.16504662 |
| co     | FC | 4        | 1 | 14              | 10                  | 168        | 407.744          | 66.567        | -112.78868462 | -113.17210120 | -113.19096316 | -113.19091005 | -113.19214366 |
| f2     | CV | 2        | 1 | 18              | 14                  | 36         | 1.001            | 0.582         | -198.68080708 | -199.16575320 | -199.17722624 | -199.17740005 | -199.17922989 |
| f2     | CV | 3        | 1 | 18              | 14                  | 86         | 52.892           | 15.165        | -198.75233363 | -199.40073624 | -199.42053685 | -199.42052303 | -199.42216063 |
| f2     | CV | 4        | 1 | 18              | 14                  | 168        | 1172.257         | 155.216       | -198.76847319 | -199.46628306 | -199.48861466 | -199.48856261 | -199.49034463 |
| f2     | FC | 2        | 1 | 18              | 14                  | 36         | 0.548            | 0.338         | -198.68069242 | -199.10429413 | -199.11535979 | -199.11552078 | -199.11732619 |
| f2     | FC | 3        | 1 | 18              | 14                  | 86         | 26.715           | 7.496         | -198.75216623 | -199.29151329 | -199.31044115 | -199.31037447 | -199.31198118 |
| f2     | FC | 4        | 1 | 18              | 14                  | 168        | 583.776          | 71.915        | -198.76828689 | -199.34390708 | -199.36523337 | -199.36512083 | -199.36686479 |
| h2o    | CV | 2        | 1 | 10              | 8                   | 28         | 0.167            | 0.127         | -76.02651910  | -76.27485871  | -76.27856217  | -76.27867957  | -76.27915731  |
| h2o    | CV | 3        | 1 | 10              | 8                   | 71         | 6.99             | 2.841         | -76.05716368  | -76.38175254  | -76.39012489  | -76.39017779  | -76.39055978  |
| h2o    | CV | 4        | 1 | 10              | 8                   | 144        | 195.33           | 34.925        | -76.06490106  | -76.41156061  | -76.42112891  | -76.42113016  | -76.42156432  |
| h2o    | FC | 2        | 1 | 10              | 8                   | 28         | 0.077            | 0.06          | -76.02647141  | -76.24405034  | -76.24760594  | -76.24772403  | -76.24819200  |
| h2o    | FC | 3        | 1 | 10              | 8                   | 71         | 4.136            | 1.704         | -76.05709849  | -76.32901971  | -76.33703792  | -76.33708150  | -76.33744554  |
| h2o    | FC | 4        | 1 | 10              | 8                   | 144        | 112.801          | 20.363        | -76.06482927  | -76.35263840  | -76.36179261  | -76.36178278  | -76.36219434  |
| h2s    | CV | 2        | 1 | 18              | 8                   | 37         | 1.612            | 1.168         | -398.69833424 | -399.01922297 | -399.02434843 | -399.02472062 | -399.02499210 |
| h2s    | CV | 3        | 1 | 18              | 8                   | 87         | 69.746           | 22.717        | -398.71557366 | -399.22631417 | -399.23714128 | -399.23770457 | -399.23813352 |
| h2s    | CV | 4        | 1 | 18              | 8                   | 169        | 1795.367         | 252.554       | -398.71936612 | -399.31911073 | -399.33187877 | -399.33242862 | -399.33295238 |
| h2s    | FC | 2        | 1 | 18              | 8                   | 37         | 0.166            | 0.112         | -398.69833271 | -398.86972572 | -398.87350560 | -398.87395968 | -398.87419970 |
| h2s    | FC | 3        | 1 | 18              | 8                   | 87         | 7.76             | 2.636         | -398.71554239 | -398.93268415 | -398.94092557 | -398.94161101 | -398.94196098 |
| h2s    | FC | 4        | 1 | 18              | 8                   | 169        | 214.704          | 33.078        | -398.71932286 | -398.94926204 | -398.95877038 | -398.95943606 | -398.95986664 |
| hcl    | CV | 2        | 1 | 18              | 8                   | 32         | 0.647            | 0.458         | -460.09151330 | -460.41141575 | -460.41553822 | -460.41574014 | -460.41602975 |
| hcl    | CV | 3        | 1 | 18              | 8                   | 73         | 29.228           | 11.679        | -460.10816109 | -460.63572874 | -460.64641303 | -460.64678033 | -460.64718099 |
| hcl    | CV | 4        | 1 | 18              | 8                   | 139        | 665.435          | 130.431       | -460.11197306 | -460.73315290 | -460.74604615 | -460.74642237 | -460.74693061 |
| hcl    | FC | 2        | 1 | 18              | 8                   | 32         | 0.071            | 0.056         | -460.09150769 | -460.26153724 | -460.26447810 | -460.26475676 | -460.26501459 |
| hcl    | FC | 3        | 1 | 18              | 8                   | 73         | 3.546            | 1.44          | -460.10814486 | -460.33509940 | -460.34335379 | -460.34386112 | -460.34418343 |
| hcl    | FC | 4        | 1 | 18              | 8                   | 139        | 79.548           | 14.671        | -460.11194986 | -460.35610308 | -460.36593633 | -460.36645000 | -460.36686127 |
| hf     | CV | 2        | 1 | 10              | 8                   | 23         | 0.068            | 0.054         | -100.01948288 | -100.26530506 | -100.26781600 | -100.26786534 | -100.26826447 |
| hf     | CV | 3        | 1 | 10              | 8                   | 57         | 2.585            | 1.257         | -100.05812315 | -100.39349126 | -100.40057574 | -100.40056650 | -100.40083575 |
| hf     | CV | 4        | 1 | 10              | 8                   | 114        | 57.219           | 13.225        | -100.06778603 | -100.42984437 | -100.43824776 | -100.43819864 | -100.43850711 |
| hf     | FC | 2        | 1 | 10              | 8                   | 23         | 0.037            | 0.031         | -100.01946810 | -100.23425097 | -100.23663890 | -100.23669014 | -100.23708029 |

| System | CV | Cardinal | M | N <sub>el</sub> | N <sub>val_el</sub> | Basis size | Time SDT(Q), min | Time SDT, min | HF            | CCSD          | CCSD(T)       | CCSDT         | CCSDT(Q)      |
|--------|----|----------|---|-----------------|---------------------|------------|------------------|---------------|---------------|---------------|---------------|---------------|---------------|
| hf     | FC | 3        | 1 | 10              | 8                   | 57         | 1.524            | 0.744         | -100.05810038 | -100.33844122 | -100.34520500 | -100.34519977 | -100.34544893 |
| hf     | FC | 4        | 1 | 10              | 8                   | 114        | 33.987           | 8.094         | -100.06775946 | -100.36818678 | -100.37620836 | -100.37616486 | -100.37644774 |
| hs     | CV | 2        | 2 | 17              | 7                   | 32         | 0.969            | 0.747         | -398.09109313 | -398.37845091 | -398.38228320 | -398.38265948 | -398.38284517 |
| hs     | CV | 3        | 2 | 17              | 7                   | 73         | 40.607           | 18.75         | -398.10652679 | -398.57838940 | -398.58735011 | -398.58804266 | -398.58834457 |
| hs     | CV | 4        | 2 | 17              | 7                   | 139        | 835.436          | 195.554       | -398.11010980 | -398.66899422 | -398.67972819 | -398.68043486 | -398.68081851 |
| hs     | FC | 2        | 2 | 17              | 7                   | 32         | 0.115            | 0.091         | -398.09109061 | -398.22903661 | -398.23162094 | -398.23207084 | -398.23222810 |
| hs     | FC | 3        | 2 | 17              | 7                   | 73         | 3.904            | 1.838         | -398.10650723 | -398.28503150 | -398.29150152 | -398.29231651 | -398.29253950 |
| hs     | FC | 4        | 2 | 17              | 7                   | 139        | 85.997           | 17.741        | -398.11008442 | -398.29940528 | -398.30697871 | -398.30780459 | -398.30809405 |
| n2     | CV | 2        | 1 | 14              | 10                  | 36         | 0.609            | 0.353         | -108.95116256 | -109.33300576 | -109.34677366 | -109.34668263 | -109.34852712 |
| n2     | CV | 3        | 1 | 14              | 10                  | 86         | 25.24            | 6.669         | -108.98396469 | -109.46250103 | -109.48266269 | -109.48237827 | -109.48425087 |
| n2     | CV | 4        | 1 | 14              | 10                  | 168        | 549.429          | 64.053        | -108.99122856 | -109.49830823 | -109.51983923 | -109.51946077 | -109.52143528 |
| n2     | FC | 2        | 1 | 14              | 10                  | 36         | 0.27             | 0.149         | -108.95101066 | -109.27250362 | -109.28585392 | -109.28575323 | -109.28756761 |
| n2     | FC | 3        | 1 | 14              | 10                  | 86         | 11.017           | 2.741         | -108.98359101 | -109.36244705 | -109.38171605 | -109.38135392 | -109.38320136 |
| n2     | FC | 4        | 1 | 14              | 10                  | 168        | 240.991          | 27.613        | -108.99080184 | -109.38663124 | -109.40714961 | -109.40667935 | -109.40862684 |
| nh     | CV | 2        | 3 | 8               | 6                   | 23         | 0.076            | 0.062         | -54.96639596  | -55.12410627  | -55.12596435  | -55.12624625  | -55.12636256  |
| nh     | CV | 3        | 3 | 8               | 6                   | 57         | 2.46             | 1.436         | -54.98134565  | -55.18942887  | -55.19370750  | -55.19414752  | -55.19425762  |
| nh     | CV | 4        | 3 | 8               | 6                   | 114        | 49.55            | 13.312        | -54.98518536  | -55.20660006  | -55.21150381  | -55.21194847  | -55.21208092  |
| nh     | FC | 2        | 3 | 8               | 6                   | 23         | 0.04             | 0.035         | -54.96637362  | -55.09402344  | -55.09575383  | -55.09603580  | -55.09614619  |
| nh     | FC | 3        | 3 | 8               | 6                   | 57         | 1.255            | 0.814         | -54.98131792  | -55.13973877  | -55.14371319  | -55.14414606  | -55.14424547  |
| nh     | FC | 4        | 3 | 8               | 6                   | 114        | 22.054           | 7.149         | -54.98515471  | -55.15115858  | -55.15570819  | -55.15614463  | -55.15626328  |
| nh2    | CV | 2        | 2 | 9               | 7                   | 28         | 0.23             | 0.187         | -55.56679391  | -55.76480231  | -55.76792832  | -55.76825451  | -55.76847970  |
| nh2    | CV | 3        | 2 | 9               | 7                   | 71         | 8.266            | 3.925         | -55.58611559  | -55.84086933  | -55.84708221  | -55.84748702  | -55.84769754  |
| nh2    | CV | 4        | 2 | 9               | 7                   | 144        | 218.42           | 44.785        | -55.59074032  | -55.86115163  | -55.86814954  | -55.86853637  | -55.86878077  |
| nh2    | FC | 2        | 2 | 9               | 7                   | 28         | 0.131            | 0.106         | -55.56674362  | -55.73442696  | -55.73740250  | -55.73772781  | -55.73794556  |
| nh2    | FC | 3        | 2 | 9               | 7                   | 71         | 4.628            | 2.277         | -55.58605125  | -55.79084982  | -55.79672118  | -55.79711040  | -55.79730975  |
| nh2    | FC | 4        | 2 | 9               | 7                   | 144        | 123.969          | 25.811        | -55.59067050  | -55.80535514  | -55.81195771  | -55.81232633  | -55.81255642  |
| nh3    | CV | 2        | 1 | 10              | 8                   | 33         | 0.958            | 0.785         | -56.19535618  | -56.43370142  | -56.43817777  | -56.43841900  | -56.43875753  |
| nh3    | CV | 3        | 1 | 10              | 8                   | 85         | 65.689           | 25.399        | -56.21799275  | -56.51893974  | -56.52722468  | -56.52743334  | -56.52775149  |
| nh3    | CV | 4        | 1 | 10              | 8                   | 174        | 3366.784         | 513.298       | -56.22320010  | -56.54170756  | -56.55092847  | -56.55108800  | -56.55145221  |
| nh3    | FC | 2        | 1 | 10              | 8                   | 33         | 0.502            | 0.411         | -56.19527476  | -56.40295182  | -56.40726796  | -56.40750683  | -56.40783625  |
| nh3    | FC | 3        | 1 | 10              | 8                   | 85         | 38.524           | 14.053        | -56.21789415  | -56.46843014  | -56.47635857  | -56.47654302  | -56.47684980  |
| nh3    | FC | 4        | 1 | 10              | 8                   | 174        | 1937.267         | 253.31        | -56.22309553  | -56.48538175  | -56.49419062  | -56.49432124  | -56.49467120  |
| no     | CV | 2        | 2 | 15              | 11                  | 36         | 1.893            | 1.467         | -129.25958504 | -129.65750430 | -129.67000340 | -129.67061441 | -129.67215316 |
| no     | CV | 3        | 2 | 15              | 11                  | 86         | 65.977           | 28.769        | -129.29727568 | -129.80861184 | -129.82863013 | -129.82891780 | -129.83051457 |

| System | CV | Cardinal | M | N <sub>el</sub> | N <sub>val_el</sub> | Basis size | Time SDT(Q), min | Time SDT, min | HF            | CCSD          | CCSD(T)       | CCSDT         | CCSDT(Q)      |
|--------|----|----------|---|-----------------|---------------------|------------|------------------|---------------|---------------|---------------|---------------|---------------|---------------|
| no     | CV | 4        | 2 | 15              | 11                  | 168        | 1697.14          | 401.9         | -129.30695472 | -129.85135411 | -129.87305229 | -129.87323754 | -129.87494742 |
| no     | FC | 2        | 2 | 15              | 11                  | 36         | 0.809            | 0.647         | -129.25949207 | -129.59681609 | -129.60891776 | -129.60953310 | -129.61103976 |
| no     | FC | 3        | 2 | 15              | 11                  | 86         | 30.386           | 12.623        | -129.29707159 | -129.70642881 | -129.72557437 | -129.72581877 | -129.72737744 |
| no     | FC | 4        | 2 | 15              | 11                  | 168        | 737.902          | 154.447       | -129.30672074 | -129.73722703 | -129.75793218 | -129.75806387 | -129.75973079 |
| o2     | CV | 2        | 3 | 16              | 12                  | 36         | 1.258            | 0.806         | -149.62693033 | -150.04846551 | -150.05969467 | -150.05976957 | -150.06172282 |
| o2     | CV | 3        | 3 | 16              | 12                  | 86         | 53.462           | 15.335        | -149.67539619 | -150.22515634 | -150.24466117 | -150.24462170 | -150.24653726 |
| o2     | CV | 4        | 3 | 16              | 12                  | 168        | 1131.377         | 141.323       | -149.68794573 | -150.27459925 | -150.29599286 | -150.29592850 | -150.29794234 |
| o2     | FC | 2        | 3 | 16              | 12                  | 36         | 0.559            | 0.343         | -149.62675227 | -149.98759933 | -149.99848887 | -149.99856111 | -150.00049335 |
| o2     | FC | 3        | 3 | 16              | 12                  | 86         | 24.84            | 6.767         | -149.67508494 | -150.12060509 | -150.13931898 | -150.13922292 | -150.14111799 |
| o2     | FC | 4        | 3 | 16              | 12                  | 168        | 538.516          | 63.851        | -149.68761250 | -150.15773239 | -150.17821456 | -150.17808220 | -150.18007117 |
| oh     | CV | 2        | 2 | 9               | 7                   | 23         | 0.108            | 0.092         | -75.39376837  | -75.59392703  | -75.59611789  | -75.59629032  | -75.59654034  |
| oh     | CV | 3        | 2 | 9               | 7                   | 57         | 3.372            | 1.9           | -75.41935974  | -75.68954809  | -75.69525634  | -75.69553351  | -75.69572946  |
| oh     | CV | 4        | 2 | 9               | 7                   | 114        | 69.434           | 18.992        | -75.42597524  | -75.71589810  | -75.72258768  | -75.72286496  | -75.72309702  |
| oh     | FC | 2        | 2 | 9               | 7                   | 23         | 0.054            | 0.046         | -75.39374842  | -75.56343659  | -75.56549705  | -75.56567015  | -75.56591309  |
| oh     | FC | 3        | 2 | 9               | 7                   | 57         | 1.93             | 1.084         | -75.41933260  | -75.63717770  | -75.64256132  | -75.64283474  | -75.64301563  |
| oh     | FC | 4        | 2 | 9               | 7                   | 114        | 39.853           | 10.906        | -75.42594425  | -75.65736459  | -75.66367243  | -75.66394543  | -75.66415793  |
| sih    | CV | 2        | 2 | 15              | 5                   | 32         | 1.008            | 0.826         | -289.43070478 | -289.66230706 | -289.66563352 | -289.66614179 | -289.66619823 |
| sih    | CV | 3        | 2 | 15              | 5                   | 73         | 31.058           | 14.264        | -289.44000027 | -289.82949217 | -289.83549425 | -289.83620858 | -289.83637461 |
| sih    | CV | 4        | 2 | 15              | 5                   | 139        | 590.636          | 133.256       | -289.44242225 | -289.90581093 | -289.91296800 | -289.91366301 | -289.91385717 |
| sih    | FC | 2        | 2 | 15              | 5                   | 32         | 0.068            | 0.057         | -289.43071043 | -289.52115900 | -289.52292606 | -289.52349059 | -289.52353716 |
| sih    | FC | 3        | 2 | 15              | 5                   | 73         | 1.89             | 1.155         | -289.43998824 | -289.54520485 | -289.54828012 | -289.54906897 | -289.54915069 |
| sih    | FC | 4        | 2 | 15              | 5                   | 139        | 35.813           | 11.225        | -289.44240827 | -289.55135979 | -289.55480295 | -289.55557140 | -289.55567039 |
